# Supplementary material for: An experimental and theoretical study on stereocontrolled glycosylations by a “one-pot” procedure
Source: Royal Society of Chemistry journal article supplement (doi:10.1039/d2qo00727d), 2022-01-01
Supplement: d2qo00727d1.pdf [file d2qo00727d1.pdf]

## **Supplementary Information**

### **An Experimental and Theoretical Study on Stereocontrolled Glycosylations by “One-pot” Procedure**

Xuemei Zhong,<sup>a,#</sup> Xiaoya Zhao,<sup>a,#</sup> Jiaming Ao,<sup>a,#</sup> Yan Huang,<sup>a</sup> Yuhua Liu,<sup>b\*</sup> Siai Zhou,<sup>a</sup> Bizhi Li,<sup>a</sup> Akihiro Ishiwata,<sup>c</sup> Qianglin Fang,<sup>d</sup> Chongguang Yang,<sup>d</sup> Hui Cai,<sup>\*a</sup>  
Feiqing Ding<sup>\*a</sup>

<sup>a</sup>School of Pharmaceutical Sciences (Shenzhen), Sun Yat-sen University, Shenzhen 518107,  
China

<sup>b</sup>School of Physics and Electronic Engineering, Guangzhou University, Guangzhou 510006,  
China

<sup>c</sup>RIKEN Cluster for Pioneering Research, Saitama 351-0198, Japan

<sup>d</sup>School of Public Health (Shenzhen), Shenzhen Campus of Sun Yat-sen University, Shenzhen  
518107, China

E-mail: [liuyuhua@gzhu.edu.cn](mailto:liuyuhua@gzhu.edu.cn), [caihui5@mail.sysu.edu.cn](mailto:caihui5@mail.sysu.edu.cn), and: [dingfq3@mail.sysu.edu.cn](mailto:dingfq3@mail.sysu.edu.cn)

---

## Table of Contents

|                                                        |    |
|--------------------------------------------------------|----|
| 1 General Information.....                             | 3  |
| 2 Cartesian coordinates of all the key structures..... | 3  |
| 3 General Glycosylation Procedures.....                | 13 |
| 4 NMR data of Compounds.....                           | 14 |
| 5 Reference.....                                       | 38 |
| 6 NMR Spectrums of Compounds.....                      | 39 |

---

## 1 General Information

All reactions sensitive to air and/or moisture were carried out under nitrogen or argon atmosphere with anhydrous solvents. Substrates of glycosylations were dried by a zeotropic removal with toluene. Column chromatography was performed on silica gel, 300–400 mesh. Reactions were monitored by thin-layer chromatography (TLC) on silica gel 60 F254 of 0.2mm thickness, and compounds were detected by examination under UV light and by charring with 10% sulfuric acid in MeOH. Noted that when using toluene–ethyl acetate (CAUTION! STRONG CARCINOGENIC ACTIVITY). Solvents were removed under reduced pressure at <40 °C. CH<sub>2</sub>Cl<sub>2</sub> was freshly distilled from calcium hydride under nitrogen prior to use. Molecular sieves (4Å) were activated at 170 °C for 2–3 h under reduced pressure prior to application. All reactions were carried out under an argon atmosphere. <sup>1</sup>H NMR and <sup>13</sup>C NMR spectra were recorded on Bruker spectrometers at 400 MHz or JEOL ECX 400 spectrometer. <sup>1</sup>H NMR spectra were referenced to CDCl<sub>3</sub> at 7.26 ppm, MeOD at 3.31 ppm and C<sub>6</sub>D<sub>6</sub> at 7.15 ppm, and <sup>13</sup>C NMR spectra were referenced to CDCl<sub>3</sub> at 77.0 ppm, MeOD at 47.67 ppm and C<sub>6</sub>D<sub>6</sub> at 128.01 ppm or native scale. Assignments were made by standard 2D experiments. Optical rotations were measured with ‘Insmark IP-digi300/1’ polarimeter. HRMS were recorded on Shimadzu (LCMS-IT-TOF). All other reagents were purchased from Adamas-Beta Co., Bidepharm Co. and Macklin Co.

The calculation package used is the Gaussian program.<sup>1</sup> All geometries were optimized at the theory level of B3LYP<sup>2</sup> //BS1 (BS1 = 6-31G(d)<sup>3</sup> for main group elements and Lanl2dz<sup>4</sup> for Sn) in the gas phase. Vibrational frequency calculations were used to confirm that the optimized structures are minima on the potential energy surface. The single point energies for the B3LYP optimized geometries were computed using the SMD<sup>5</sup> solvent model (solvent = DCM) at the M06<sup>6</sup> //BS2 (BS2=6-311+G\*\*<sup>4</sup> for main group elements and SDD<sup>7</sup> for Sn) level of theory.

## 2 Cartesian coordinates of all the key structures

TS4

Charge = 0 Multiplicity = 1

|                                            |          |          |              |
|--------------------------------------------|----------|----------|--------------|
| H                                          | 2.06158  | -0.84197 | -1.0792      |
| Cl                                         | 1.50483  | 0.52711  | -1.41039     |
| Cl                                         | -0.70483 | -0.46186 | 1.40732      |
| Cl                                         | -1.41844 | -1.59589 | -2.28873     |
| Cl                                         | -0.72329 | -3.98442 | 0.42136      |
| C                                          | 2.63535  | -2.95346 | 0.0944       |
| H                                          | 2.20053  | -3.94917 | 0.20091      |
| H                                          | 3.57032  | -3.01827 | -0.46561     |
| H                                          | 2.81575  | -2.512   | 1.07898      |
| Sn                                         | -0.17903 | -1.85347 | -0.36417     |
| O                                          | 1.74764  | -2.11835 | -0.68303     |
| Thermal correction to Energy=              |          |          | 0.063922     |
| Thermal correction to Enthalpy=            |          |          | 0.064866     |
| Thermal correction to Gibbs Free Energy=   |          |          | 0.011712     |
| Sum of electronic and zero-point Energies= |          |          | -1959.953068 |
| Sum of electronic and thermal Energies=    |          |          | -1959.941634 |

---

Sum of electronic and thermal Enthalpies= -1959.940689  
Sum of electronic and thermal Free Energies= -1959.993844  
SCF Done: E(RM06) = -1959.97209909

TS7

Charge = 0 Multiplicity = 1

|   |          |          |          |
|---|----------|----------|----------|
| C | 1.56299  | 0.0197   | 0.17844  |
| H | 1.49616  | -1.01917 | -0.02876 |
| C | 0.29809  | 0.70658  | 0.62337  |
| H | 0.39262  | 0.83783  | 1.7153   |
| C | 0.19942  | 2.11257  | 0.01193  |
| H | 0.06428  | 2.02633  | -1.07327 |
| C | 1.51076  | 2.86459  | 0.29005  |
| H | 1.61541  | 3.00335  | 1.37836  |
| C | 2.71961  | 2.08653  | -0.25551 |
| H | 2.67178  | 2.10492  | -1.34785 |
| O | 2.69431  | 0.65879  | 0.10025  |
| C | -1.18954 | -1.02575 | 1.32443  |
| H | -1.45971 | -0.47767 | 2.24031  |
| C | -2.35009 | -1.84261 | 0.8251   |
| C | -2.14863 | -3.13532 | 0.32813  |
| H | -1.14697 | -3.55846 | 0.32185  |
| C | -3.22451 | -3.88534 | -0.15077 |
| H | -3.05611 | -4.88954 | -0.53    |
| C | -4.51212 | -3.34626 | -0.13947 |
| H | -5.35055 | -3.92995 | -0.51013 |
| C | -4.72222 | -2.05603 | 0.3547   |
| C | -3.64653 | -1.31064 | 0.83606  |
| O | -0.86284 | 2.83526  | 0.59859  |
| C | -2.07722 | 2.84289  | -0.1655  |
| O | 1.53277  | 4.11162  | -0.37763 |
| C | 1.11636  | 5.23609  | 0.4244   |
| C | 4.06     | 2.62601  | 0.23584  |
| H | 4.03288  | 3.72123  | 0.14063  |
| H | -5.72359 | -1.63408 | 0.36905  |
| O | 1.37381  | -0.15046 | -1.9174  |
| C | 2.06483  | -1.22948 | -3.90298 |
| O | 2.30737  | -1.31681 | 1.74785  |
| C | 2.89491  | -0.74837 | 2.89345  |
| H | 3.51062  | -1.4695  | 3.44791  |
| H | 3.52982  | 0.12033  | 2.65805  |
| H | 2.08435  | -0.41975 | 3.56229  |
| C | 2.11796  | -1.05649 | -2.32519 |
| N | 2.91392  | -1.89    | -1.64484 |
| H | 3.40262  | -2.53276 | -2.26733 |



---

|    |          |          |          |
|----|----------|----------|----------|
| Cl | 2.45162  | 0.36621  | -4.63906 |
| Cl | 0.38966  | -1.71071 | -4.32365 |
| Cl | 3.2081   | -2.45101 | -4.5633  |
| O  | -0.83361 | -0.05902 | 0.3075   |
| H  | -0.32566 | -1.66121 | 1.55414  |
| H  | -3.81154 | -0.30814 | 1.22489  |
| H  | -1.89019 | 3.29049  | -1.15237 |
| H  | -2.40728 | 1.80833  | -0.32331 |
| C  | -3.12139 | 3.63847  | 0.57912  |
| C  | -3.94363 | 4.5416   | -0.10451 |
| C  | -3.30722 | 3.46121  | 1.95705  |
| C  | -4.94135 | 5.24828  | 0.5713   |
| H  | -3.80509 | 4.69106  | -1.17314 |
| C  | -4.29684 | 4.17254  | 2.63486  |
| H  | -2.66137 | 2.77418  | 2.49564  |
| C  | -5.11918 | 5.06627  | 1.94326  |
| H  | -5.57291 | 5.94491  | 0.02647  |
| H  | -4.42774 | 4.02934  | 3.70427  |
| H  | -5.89097 | 5.61902  | 2.47199  |
| C  | 1.05968  | 6.4569   | -0.45602 |
| C  | 2.23842  | 7.04974  | -0.92801 |
| C  | -0.17212 | 7.00883  | -0.82536 |
| C  | 2.18741  | 8.17166  | -1.75392 |
| H  | 3.20022  | 6.62765  | -0.64573 |
| C  | -0.22693 | 8.13621  | -1.64783 |
| H  | -1.0922  | 6.55473  | -0.46433 |
| C  | 0.95251  | 8.71826  | -2.11448 |
| H  | 3.10852  | 8.62323  | -2.11257 |
| H  | -1.18956 | 8.55849  | -1.92341 |
| H  | 0.91174  | 9.5959   | -2.75404 |
| H  | 1.84445  | 5.37617  | 1.23922  |
| H  | 0.13848  | 5.02909  | 0.86704  |
| O  | 5.16242  | 2.07638  | -0.44553 |
| H  | 4.18295  | 2.36596  | 1.29325  |
| C  | 5.47192  | 2.70859  | -1.68295 |
| H  | 5.54848  | 3.79846  | -1.5198  |
| H  | 4.669    | 2.55359  | -2.42065 |
| C  | 6.77507  | 2.16552  | -2.22263 |
| C  | 7.79187  | 1.74226  | -1.35871 |
| C  | 6.99364  | 2.12535  | -3.60433 |
| C  | 9.00712  | 1.28765  | -1.87199 |
| H  | 7.61715  | 1.75327  | -0.28806 |
| C  | 8.21299  | 1.68084  | -4.11773 |
| H  | 6.20443  | 2.4398   | -4.28435 |

|                                              |                |          |              |
|----------------------------------------------|----------------|----------|--------------|
| C                                            | 9.22338        | 1.2595   | -3.25144     |
| H                                            | 9.78538        | 0.95111  | -1.19219     |
| H                                            | 8.36822        | 1.65284  | -5.19302     |
| H                                            | 10.17023       | 0.90389  | -3.64891     |
| Sn                                           | 3.677          | -2.57181 | 0.29343      |
| Cl                                           | 5.56905        | -1.56402 | 1.27773      |
| Cl                                           | 2.34146        | -4.34764 | 1.09765      |
| Cl                                           | 5.02484        | -4.0156  | -1.07417     |
| Thermal correction to Energy=                |                |          | 0.756009     |
| Thermal correction to Enthalpy=              |                |          | 0.756953     |
| Thermal correction to Gibbs Free Energy=     |                |          | 0.591507     |
| Sum of electronic and zero-point Energies=   |                |          | -4778.552194 |
| Sum of electronic and thermal Energies=      |                |          | -4778.497306 |
| Sum of electronic and thermal Enthalpies=    |                |          | -4778.496362 |
| Sum of electronic and thermal Free Energies= |                |          | -4778.661808 |
| SCF Done: E(RM06) =                          | -4778.50245395 |          |              |

TS10

Charge = 0 Multiplicity = 1

|                                              |                |          |              |
|----------------------------------------------|----------------|----------|--------------|
| H                                            | 1.49098        | -1.31437 | -1.51627     |
| Cl                                           | 0.4018         | -0.68127 | -2.30303     |
| Cl                                           | -0.15561       | 0.5197   | 1.11142      |
| Cl                                           | -2.37059       | -2.14187 | -0.62162     |
| Cl                                           | -0.10363       | -3.04993 | 2.03629      |
| Sn                                           | -0.25769       | -1.61087 | 0.19233      |
| N                                            | 1.8601         | -1.83664 | -0.37041     |
| C                                            | 2.64292        | -3.01721 | -0.27137     |
| O                                            | 3.61034        | -3.10177 | 0.43577      |
| C                                            | 2.2543         | -4.17404 | -1.24787     |
| Cl                                           | 2.97548        | -3.73554 | -2.83814     |
| Cl                                           | 0.45716        | -4.30486 | -1.42563     |
| Cl                                           | 2.90528        | -5.71227 | -0.66819     |
| H                                            | 2.36076        | -1.12411 | 0.17321      |
| Thermal correction to Energy=                |                |          | 0.062329     |
| Thermal correction to Enthalpy=              |                |          | 0.063273     |
| Thermal correction to Gibbs Free Energy=     |                |          | -0.002404    |
| Sum of electronic and zero-point Energies=   |                |          | -3432.160597 |
| Sum of electronic and thermal Energies=      |                |          | -3432.144165 |
| Sum of electronic and thermal Enthalpies=    |                |          | -3432.143221 |
| Sum of electronic and thermal Free Energies= |                |          | -3432.208898 |
| SCF Done: E(RM06) =                          | -3432.17327234 |          |              |

12

Charge = 0 Multiplicity = 1

|   |          |          |          |
|---|----------|----------|----------|
| C | -0.50447 | -0.82175 | -0.43832 |
| H | -1.11031 | -1.58742 | -0.89601 |

---

|   |          |          |          |
|---|----------|----------|----------|
| C | -1.12822 | 0.36755  | 0.31577  |
| H | -1.03923 | 0.18117  | 1.39699  |
| C | -0.3839  | 1.67588  | 0.02176  |
| H | -0.86439 | 1.87401  | -0.93957 |
| C | 1.10934  | 1.97111  | -0.09013 |
| H | 1.60025  | 1.76426  | 0.87286  |
| C | 1.85048  | 1.46219  | -1.33949 |
| H | 1.40536  | 1.9216   | -2.22242 |
| O | 1.74563  | 0.01503  | -1.53291 |
| C | -3.44296 | -0.37126 | 0.35139  |
| H | -3.69457 | -0.27238 | 1.42018  |
| C | -4.66322 | -0.17016 | -0.51734 |
| C | -4.49396 | 0.12007  | -1.87904 |
| H | -3.4841  | 0.23784  | -2.26819 |
| C | -5.61339 | 0.26655  | -2.69835 |
| H | -5.48051 | 0.49443  | -3.75295 |
| C | -6.90102 | 0.12253  | -2.1728  |
| H | -7.76945 | 0.23818  | -2.81634 |
| C | -7.06891 | -0.1643  | -0.8173  |
| C | -5.95112 | -0.30538 | 0.00862  |
| O | -0.91024 | 2.49185  | 1.05918  |
| C | -2.2065  | 3.03406  | 0.79296  |
| O | 1.35402  | 3.30834  | -0.49671 |
| C | 1.5663   | 4.2474   | 0.57933  |
| C | 3.34099  | 1.72907  | -1.24761 |
| H | 3.8439   | 1.63795  | -2.21401 |
| H | 3.49537  | 2.72575  | -0.83323 |
| O | 3.90368  | 0.73917  | -0.33722 |
| C | 5.27276  | 1.07506  | 0.09709  |
| H | -8.06702 | -0.2693  | -0.39982 |
| H | 5.86662  | 1.28335  | -0.79741 |
| H | 5.63763  | 0.15744  | 0.55725  |
| C | 5.28184  | 2.22388  | 1.06773  |
| C | 4.72268  | 2.07149  | 2.34566  |
| C | 5.87537  | 3.44463  | 0.72352  |
| C | 4.75135  | 3.12498  | 3.25803  |
| H | 4.27093  | 1.12244  | 2.62329  |
| C | 5.91224  | 4.49869  | 1.64011  |
| H | 6.32161  | 3.56718  | -0.26078 |
| C | 5.34709  | 4.34065  | 2.90643  |
| H | 4.3183   | 2.99704  | 4.24607  |
| H | 6.383    | 5.43834  | 1.36533  |
| H | 5.37336  | 5.15921  | 3.62005  |
| O | -2.47043 | 0.5948   | -0.02526 |

---

|                                            |          |          |              |
|--------------------------------------------|----------|----------|--------------|
| H                                          | -3.05157 | -1.3887  | 0.20296      |
| H                                          | -6.08424 | -0.51783 | 1.06774      |
| H                                          | -2.19028 | 3.59273  | -0.15433     |
| H                                          | -2.92665 | 2.2138   | 0.67755      |
| C                                          | -2.6051  | 3.94822  | 1.92771      |
| C                                          | -3.36244 | 5.098    | 1.67131      |
| C                                          | -2.26287 | 3.64582  | 3.25243      |
| C                                          | -3.77855 | 5.92563  | 2.71635      |
| H                                          | -3.63158 | 5.34581  | 0.64658      |
| C                                          | -2.67036 | 4.47654  | 4.29661      |
| H                                          | -1.6665  | 2.76179  | 3.45464      |
| C                                          | -3.43202 | 5.61761  | 4.03289      |
| H                                          | -4.36646 | 6.81385  | 2.50013      |
| H                                          | -2.39434 | 4.2318   | 5.31924      |
| H                                          | -3.75016 | 6.26316  | 4.84721      |
| C                                          | 1.68313  | 5.62647  | -0.01578     |
| C                                          | 2.90307  | 6.08     | -0.53336     |
| C                                          | 0.56436  | 6.46581  | -0.08296     |
| C                                          | 3.00405  | 7.34599  | -1.11072     |
| H                                          | 3.77933  | 5.4382   | -0.4739      |
| C                                          | 0.66195  | 7.73405  | -0.65759     |
| H                                          | -0.38461 | 6.1245   | 0.32404      |
| C                                          | 1.88179  | 8.17552  | -1.1743      |
| H                                          | 3.95677  | 7.68779  | -1.50697     |
| H                                          | -0.21257 | 8.37783  | -0.69994     |
| H                                          | 1.95925  | 9.16351  | -1.62048     |
| H                                          | 2.48769  | 3.97586  | 1.11524      |
| H                                          | 0.72788  | 4.1915   | 1.27773      |
| O                                          | -0.06268 | -1.79203 | 0.98647      |
| C                                          | -1.06175 | -2.49689 | 1.73464      |
| H                                          | -1.65227 | -3.15014 | 1.0845       |
| H                                          | -0.56943 | -3.09826 | 2.50303      |
| H                                          | -1.70964 | -1.76137 | 2.2197       |
| Sn                                         | 3.39312  | -1.39256 | -1.09613     |
| Cl                                         | 5.44068  | -2.38906 | -0.37046     |
| Cl                                         | 4.48507  | -1.1924  | -3.21265     |
| Cl                                         | 2.32576  | -3.2996  | -2.06362     |
| Cl                                         | 2.50882  | -2.20783 | 0.96917      |
| Thermal correction to Energy=              |          |          | 0.718816     |
| Thermal correction to Enthalpy=            |          |          | 0.719761     |
| Thermal correction to Gibbs Free Energy=   |          |          | 0.578992     |
| Sum of electronic and zero-point Energies= |          |          | -3651.507872 |
| Sum of electronic and thermal Energies=    |          |          | -3651.461030 |
| Sum of electronic and thermal Enthalpies=  |          |          | -3651.460086 |

---

Sum of electronic and thermal Free Energies= -3651.600854

SCF Done: E(RM06) = -3651.47710568

13

Charge = 0 Multiplicity = 1

|   |          |          |          |
|---|----------|----------|----------|
| C | 2.0692   | 2.19754  | 1.76033  |
| O | -0.07362 | -0.00849 | -0.89147 |
| C | -0.47625 | 1.31363  | -0.99163 |
| C | 0.0836   | 2.12319  | 0.17316  |
| C | -0.22328 | 1.45496  | 1.53524  |
| C | 1.13456  | 1.08816  | 2.19536  |
| C | 4.30355  | 3.01939  | 1.95409  |
| C | -0.23311 | 1.83077  | -2.41563 |
| O | 1.71605  | -0.10959 | 1.80333  |
| C | 1.06478  | -1.31353 | 2.2777   |
| O | -0.89457 | 2.37818  | 2.37723  |
| C | -2.29666 | 2.09026  | 2.59735  |
| O | 1.58283  | 2.24178  | 0.17538  |
| C | 2.20783  | 3.23486  | -0.70548 |
| O | -0.97742 | 0.9263   | -3.2374  |
| C | -0.85855 | 1.16412  | -4.6609  |
| C | -1.55372 | 2.44032  | -5.0715  |
| C | -0.88466 | 3.41096  | -5.82505 |
| C | -2.89474 | 2.65475  | -4.71784 |
| C | -1.54342 | 4.57416  | -6.2324  |
| C | -3.54949 | 3.81948  | -5.11542 |
| C | -2.87639 | 4.781    | -5.87606 |
| H | 1.76323  | 3.19669  | 2.09268  |
| H | -1.56768 | 1.41581  | -0.82569 |
| H | -0.30097 | 3.14781  | 0.17319  |
| H | -0.80208 | 0.54419  | 1.37535  |
| H | 0.99215  | 1.15481  | 3.28647  |
| H | 4.72665  | 3.22894  | 0.96916  |
| H | 3.82668  | 3.91491  | 2.37003  |
| H | -0.61298 | 2.85029  | -2.56283 |
| H | 0.82508  | 1.77379  | -2.69869 |
| H | 0.30476  | -1.6129  | 1.54946  |
| H | 2.44752  | 4.11697  | -0.09995 |
| H | 0.20362  | 1.16979  | -4.93237 |
| H | -1.32469 | 0.28669  | -5.11307 |
| H | 0.15509  | 3.25163  | -6.10321 |
| H | -3.41654 | 1.90407  | -4.12996 |
| H | -1.01418 | 5.31685  | -6.82371 |
| H | -4.58903 | 3.97456  | -4.83898 |
| H | -3.391   | 5.68515  | -6.19052 |

---

|    |          |          |          |
|----|----------|----------|----------|
| O  | 3.36054  | 1.93665  | 1.85303  |
| Cl | -1.98711 | -2.10421 | -4.17975 |
| Cl | 1.2879   | -1.37495 | -3.31843 |
| Cl | -3.09809 | -0.64187 | -1.27259 |
| Cl | -0.63451 | -3.25178 | -0.88417 |
| Sn | -0.8909  | -1.28792 | -2.20065 |
| H  | 5.08862  | 2.67375  | 2.62756  |
| H  | 3.06689  | 2.82459  | -1.19395 |
| C  | 1.66241  | 3.87483  | -1.99566 |
| C  | 2.30773  | 3.65084  | -3.21215 |
| C  | 0.52324  | 4.6783   | -1.94809 |
| C  | 1.8143   | 4.23077  | -4.38067 |
| H  | 3.20625  | 3.01797  | -3.2492  |
| C  | 0.02896  | 5.25769  | -3.11702 |
| H  | 0.01441  | 4.85481  | -0.98941 |
| C  | 0.67434  | 5.03418  | -4.33319 |
| H  | 2.32325  | 4.05477  | -5.33946 |
| H  | -0.86948 | 5.89081  | -3.07928 |
| H  | 0.28544  | 5.49128  | -5.25466 |
| C  | -3.03725 | 2.04653  | 1.24782  |
| C  | -3.96649 | 1.03717  | 0.9945   |
| C  | -2.77914 | 3.01605  | 0.27882  |
| C  | -4.63693 | 0.99702  | -0.22784 |
| H  | -4.16919 | 0.27253  | 1.75836  |
| C  | -3.45043 | 2.9766   | -0.94357 |
| H  | -2.04692 | 3.81176  | 0.47838  |
| C  | -4.37911 | 1.96723  | -1.19709 |
| H  | -5.36892 | 0.2011   | -0.42783 |
| H  | -3.24702 | 3.74139  | -1.70724 |
| H  | -4.9079  | 1.93541  | -2.16076 |
| H  | -2.45943 | 1.18402  | 3.14246  |
| H  | -2.64634 | 2.94147  | 3.1433   |
| C  | 0.37885  | -1.01764 | 3.62438  |
| C  | 0.98259  | -0.15544 | 4.54011  |
| C  | -0.84604 | -1.6115  | 3.9286   |
| C  | 0.36185  | 0.11226  | 5.76005  |
| H  | 1.94864  | 0.31199  | 4.30029  |
| C  | -1.46757 | -1.34305 | 5.14845  |
| H  | -1.32211 | -2.29093 | 3.2069   |
| C  | -0.8638  | -0.48143 | 6.06421  |
| H  | 0.83797  | 0.79136  | 6.48215  |
| H  | -2.43353 | -1.8111  | 5.38787  |
| H  | -1.35307 | -0.27017 | 7.02612  |
| H  | 1.81105  | -2.07144 | 2.39405  |

---

|                                              |                |
|----------------------------------------------|----------------|
| Thermal correction to Energy=                | 0.718444       |
| Thermal correction to Enthalpy=              | 0.719388       |
| Thermal correction to Gibbs Free Energy=     | 0.580582       |
| Sum of electronic and zero-point Energies=   | -3651.461083   |
| Sum of electronic and thermal Energies=      | -3651.414173   |
| Sum of electronic and thermal Enthalpies=    | -3651.413229   |
| Sum of electronic and thermal Free Energies= | -3651.552036   |
| SCF Done: E(RM06) =                          | -3651.45413091 |

14

Charge = 1 Multiplicity = 1

|   |          |          |          |
|---|----------|----------|----------|
| C | 1.40569  | 0.00768  | -0.94711 |
| H | 1.44891  | -1.0179  | -1.26833 |
| C | 0.14467  | 0.55091  | -0.29821 |
| H | 0.28767  | 0.46237  | 0.78317  |
| C | -0.0409  | 2.03985  | -0.60086 |
| H | -0.3012  | 2.1845   | -1.65754 |
| C | 1.2778   | 2.75399  | -0.28881 |
| H | 1.53362  | 2.58538  | 0.76325  |
| C | 2.40822  | 2.23157  | -1.17907 |
| H | 2.22352  | 2.56342  | -2.2045  |
| O | 2.41023  | 0.74852  | -1.3008  |
| C | -1.54257 | -1.04046 | 0.31768  |
| H | -1.94893 | -0.37904 | 1.09468  |
| C | -2.62978 | -1.87568 | -0.30234 |
| C | -2.39815 | -3.217   | -0.62999 |
| H | -1.43003 | -3.66052 | -0.40981 |
| C | -3.3998  | -3.9848  | -1.22715 |
| H | -3.21039 | -5.02683 | -1.47049 |
| C | -4.64305 | -3.41451 | -1.50741 |
| H | -5.4246  | -4.0119  | -1.96944 |
| C | -4.8832  | -2.07577 | -1.18599 |
| C | -3.88178 | -1.31277 | -0.58564 |
| O | -1.06901 | 2.52806  | 0.23995  |
| C | -2.02461 | 3.36189  | -0.40743 |
| O | 1.16906  | 4.14081  | -0.56289 |
| C | 1.2383   | 4.98266  | 0.60875  |
| C | 3.81051  | 2.70334  | -0.77796 |
| H | 4.55647  | 2.06902  | -1.27417 |
| H | 3.9126   | 3.71861  | -1.17424 |
| O | 4.03822  | 2.80154  | 0.60922  |
| C | 4.46988  | 1.59452  | 1.27431  |
| H | -5.85186 | -1.63024 | -1.39659 |
| H | 3.71284  | 0.8054   | 1.20078  |
| H | 4.53133  | 1.89545  | 2.32577  |

---

|                                            |          |          |              |
|--------------------------------------------|----------|----------|--------------|
| C                                          | 5.81014  | 1.0847   | 0.78837      |
| C                                          | 6.90143  | 1.95532  | 0.65299      |
| C                                          | 5.97951  | -0.27393 | 0.49378      |
| C                                          | 8.14134  | 1.4757   | 0.2329       |
| H                                          | 6.77     | 3.01173  | 0.87429      |
| C                                          | 7.22547  | -0.7557  | 0.0824       |
| H                                          | 5.13223  | -0.94883 | 0.59397      |
| C                                          | 8.30681  | 0.11639  | -0.05062     |
| H                                          | 8.98058  | 2.15928  | 0.13077      |
| H                                          | 7.34706  | -1.81261 | -0.14022     |
| H                                          | 9.27447  | -0.25834 | -0.37447     |
| O                                          | -0.96029 | -0.21423 | -0.72056     |
| H                                          | -0.76136 | -1.66528 | 0.76438      |
| H                                          | -4.07002 | -0.27294 | -0.32792     |
| H                                          | -1.5167  | 4.19101  | -0.91798     |
| H                                          | -2.55492 | 2.77506  | -1.17626     |
| C                                          | -3.0111  | 3.89997  | 0.60547      |
| C                                          | -3.83565 | 4.97655  | 0.25016      |
| C                                          | -3.14441 | 3.33392  | 1.87779      |
| C                                          | -4.78248 | 5.4724   | 1.14646      |
| H                                          | -3.73621 | 5.42923  | -0.73464     |
| C                                          | -4.08862 | 3.83482  | 2.77741      |
| H                                          | -2.49939 | 2.50988  | 2.16179      |
| C                                          | -4.91169 | 4.90183  | 2.4153       |
| H                                          | -5.4147  | 6.30751  | 0.85645      |
| H                                          | -4.17861 | 3.38856  | 3.76436      |
| H                                          | -5.64545 | 5.28986  | 3.11657      |
| C                                          | 1.0817   | 6.41551  | 0.172        |
| C                                          | 2.16101  | 7.10287  | -0.39895     |
| C                                          | -0.14621 | 7.07411  | 0.30793      |
| C                                          | 2.01677  | 8.42184  | -0.82766     |
| H                                          | 3.11951  | 6.59961  | -0.50299     |
| C                                          | -0.29324 | 8.39633  | -0.11678     |
| H                                          | -0.99018 | 6.55055  | 0.75157      |
| C                                          | 0.78749  | 9.07161  | -0.68632     |
| H                                          | 2.86243  | 8.94507  | -1.26599     |
| H                                          | -1.25    | 8.89847  | -0.00025     |
| H                                          | 0.67507  | 10.10143 | -1.01492     |
| H                                          | 2.20571  | 4.82038  | 1.1018       |
| H                                          | 0.43935  | 4.70015  | 1.30463      |
| Thermal correction to Energy=              |          |          | 0.654963     |
| Thermal correction to Enthalpy=            |          |          | 0.655907     |
| Thermal correction to Gibbs Free Energy=   |          |          | 0.541902     |
| Sum of electronic and zero-point Energies= |          |          | -1691.844062 |



|                                              |                |
|----------------------------------------------|----------------|
| Sum of electronic and thermal Energies=      | -1691.808999   |
| Sum of electronic and thermal Enthalpies=    | -1691.808055   |
| Sum of electronic and thermal Free Energies= | -1691.922060   |
| SCF Done: E(RM06) =                          | -1691.81594352 |

### 3 General Glycosylation Procedures

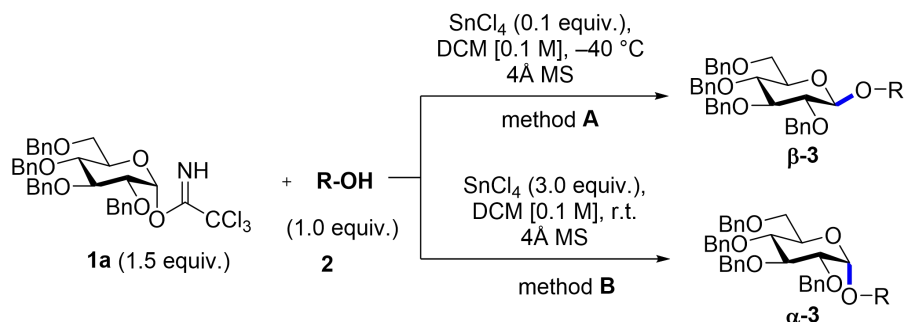

General procedure of **Method A**: The trichloroacetimidate donor **1a** and alcohol acceptor **2** were combined in a flask, co-evaporated with toluene (3 × 3 mL) and dissolved in DCM to maintain a concentration of 0.01 M (based on the acceptor). Powdered freshly activated molecular sieves (100 mg/mL solvent) were added, and the mixture was stirred for 30 min under argon at ambient temperature and then cooled to -40 °C. A solution of SnCl<sub>4</sub> in DCM (0.10 equiv, 0.1 M solution in DCM) was added dropwise. After stirring for 12 hours at the same temperature, TLC indicated that the reaction was complete and then the reaction was allowed to warm slowly to room temperature. The reaction was quenched by the addition of Et<sub>3</sub>N. The suspension was diluted with DCM and filtered through a pad of Celite, and the filtrate washed with saturated NaHCO<sub>3</sub> and NaCl aqueous, dried over Na<sub>2</sub>SO<sub>4</sub> and evaporated. The residue was purified by flash chromatography or simple preparative thin-layer chromatography on silica gel (EtOAc–hexane or EtOAc–toluene or acetone–toluene elution) to afford the β-isomer and a trace amount of N-glucosyl trichloroacetamide.

General procedure of **Method B**: The trichloroacetimidate donor **1a** and alcohol acceptor **2** were combined in a flask, co-evaporated with toluene (3 × 3 mL) and dissolved in DCM to maintain a concentration of 0.01 M (based on acceptor). Powdered freshly activated molecular sieves (100 mg/mL solvent) were added, and the mixture was stirred for 15 min under argon at ambient temperature. Then, a solution of SnCl<sub>4</sub> in DCM (3.0 equiv., 0.1 M solution in DCM) was added dropwise at 0 °C. After stirring for 3 hours at ambient temperature, TLC indicated that the reaction was complete, and then the reaction was quenched by the addition of Et<sub>3</sub>N. The suspension was diluted with EtOAc and filtered through a pad of Celite, and the filtrate washed with saturated NaHCO<sub>3</sub> and NaCl aqueous, dried over Na<sub>2</sub>SO<sub>4</sub> and evaporated. The residue was purified by flash chromatography or simple preparative thin-layer chromatography on silica gel (EtOAc–hexane or EtOAc–toluene or acetone–toluene elution) to afford pure α-isomer concomitant as major with pure β-isomer as minor.

## 4 NMR data of Compounds

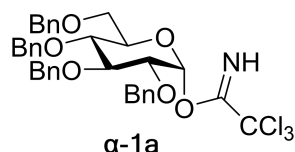

### 2,3,4,6-tetra-*O*-benzyl- $\alpha$ -D-glucopyranoside trichloroacetimidate **$\alpha$ -1a**:

To a magnetically stirred solution of 2,3,4,6-tetra-*O*-benzyl- $\alpha$ -D-glucopyranoside (500 mg, 0.9 mmol) and  $\text{CCl}_3\text{CN}$  (0.37 mL, 3.7 mmol, 4 equiv.) in anhydrous  $\text{CH}_2\text{Cl}_2$  (20 mL), DBU (26  $\mu\text{L}$ , 0.18 mmol, 0.2 equiv.) was added dropwise at 0  $^\circ\text{C}$ , and the reaction mixture was stirred at the same temperature for 3 h, after which complete consumption of starting materials was observed. The reaction mixture was concentrated and purified by flash chromatography on silica gel (preconditioned with  $\text{Et}_3\text{N}$ ; eluent: hexane– $\text{EtOAc}$ , 4:1) to afford compound  **$\alpha$ -1a** (600 mg, 97% yield) as a white powder. TLC (hexane– $\text{EtOAc}$ , 4:1):  $R_f = 0.60$ ;  $^1\text{H}$  NMR ( $\text{CDCl}_3$ , 400 MHz):  $\delta$  8.60 (s, 1H, NH), 7.36–7.16 (m, 20H, ArH), 6.55 (d, 1H,  $J = 3.48\text{ Hz}$ , C1<sup>Glc</sup>-H), 4.98 (d, 1H,  $J = 11.00\text{ Hz}$ , OCH<sub>2</sub>Ph), 4.89–4.83 (m, 2H, OCH<sub>2</sub>Ph), 4.77 (d, 1H,  $J = 11.56\text{ Hz}$ , OCH<sub>2</sub>Ph), 4.70 (d, 1H,  $J = 11.36\text{ Hz}$ , OCH<sub>2</sub>Ph), 4.62 (d, 1H,  $J = 12.04\text{ Hz}$ , OCH<sub>2</sub>Ph), 4.55 (d, 1H,  $J = 10.72\text{ Hz}$ , OCH<sub>2</sub>Ph), 4.49 (d, 1H,  $J = 12.04\text{ Hz}$ , OCH<sub>2</sub>Ph), 4.07 (t, 1H,  $J = 9.36\text{ Hz}$ , C3<sup>Glc</sup>-H), 4.02–4.00 (m, 1H, C5<sup>Glc</sup>-H), 3.83–3.77 (m, 3H, C4<sup>Glc</sup>-H, C6<sup>Glc</sup>-H and C2<sup>Glc</sup>-H), 3.69 (dd, 1H,  $J = 1.92, 10.76\text{ Hz}$ , C6<sup>Glc</sup>-H);  $^{13}\text{C}\{^1\text{H}\}$  NMR ( $\text{CDCl}_3$ , 400 MHz):  $\delta$  162.3, 138.3, 137.9, 137.8, 128.6, 128.5, 127.9, 92.5, 77.5, 77.1, 77.0, 76.8, 76.6, 75.6, 73.7, 73.0, 72.0; HRMS (ESI)  $m/z$   $[\text{M}+\text{Na}]^+$  calcd for  $\text{C}_{36}\text{H}_{36}\text{Cl}_3\text{NNaO}_6$  706.1506, found 706.1509.

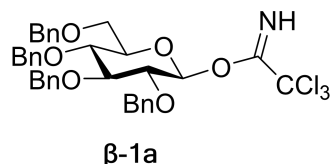

### 2,3,4,6-tetra-*O*-benzyl- $\beta$ -D-glucopyranoside trichloroacetimidate **$\beta$ -1a**:

To a magnetically stirred solution of 2,3,4,6-tetra-*O*-benzyl- $\alpha$ -D-glucopyranoside (60 mg, 0.12 mmol) and  $\text{CCl}_3\text{CN}$  (0.15 mL, 1.44 mmol, 13.0 equiv.) in anhydrous  $\text{CH}_2\text{Cl}_2$  (2.0 mL),  $\text{K}_2\text{CO}_3$  (77.0 mg, 0.55 mmol, 5.0 equiv.) was added at room temperature, and the reaction mixture was stirred at the same temperature for overnight, after which complete consumption of starting materials was observed. The reaction mixture was concentrated and purified by flash chromatography on silica gel (preconditioned with  $\text{Et}_3\text{N}$ ; eluent: hexane– $\text{EtOAc}$ , 5:1) to afford compound  **$\beta$ -1a** (71.3 mg, 87% yield) as a white powder. TLC (hexane– $\text{EtOAc}$ , 4:1):  $R_f = 0.60$ ,  $[\alpha]_D^{21} = +18.6$  ( $c = 0.66$ ,  $\text{CHCl}_3$ );  $^1\text{H}$  NMR ( $\text{CDCl}_3$ , 400 MHz):  $\delta$  8.70 (s, 1H, NH), 7.33–7.15 (m, 20H, ArH), 5.80 (d, 1H,  $J = 6.80\text{ Hz}$ , C1<sup>Glc</sup>-H), 4.94 (d, 1H,  $J = 10.80\text{ Hz}$ , OCH<sub>2</sub>Ph), 4.91 (d, 1H,  $J = 11.20\text{ Hz}$ , OCH<sub>2</sub>Ph), 4.83–4.74 (m, 3H, OCH<sub>2</sub>Ph), 4.62 (d, 1H,  $J = 12.40\text{ Hz}$ , OCH<sub>2</sub>Ph), 4.57 (d, 1H,  $J = 10.80\text{ Hz}$ , OCH<sub>2</sub>Ph), 4.53 (d, 1H,  $J = 12.40\text{ Hz}$ , OCH<sub>2</sub>Ph), 3.76–3.61 (m, 6H, C3<sup>Glc</sup>-H, C5<sup>Glc</sup>-H, C4<sup>Glc</sup>-H, C6<sup>Glc</sup>-H, C6<sup>Glc</sup>-H and C2<sup>Glc</sup>-H);  $^{13}\text{C}\{^1\text{H}\}$  NMR ( $\text{CDCl}_3$ , 400 MHz):  $\delta$  161.2, 138.4, 138.1, 138.0, 137.9, 128.4, 128.3, 128.0, 127.9, 128.8, 127.7, 127.6, 100.0, 98.4 (C1<sup>Glc</sup>), 91.0, 84.6, 80.9, 77.4, 77.3, 77.0, 76.7, 75.9, 75.6, 75.0, 75.9, 73.3, 68.2, 29.7; HRMS (ESI)  $m/z$   $[\text{M}+\text{Na}]^+$  calcd for  $\text{C}_{36}\text{H}_{36}\text{Cl}_3\text{NNaO}_6$  706.1506, found 706.1512.

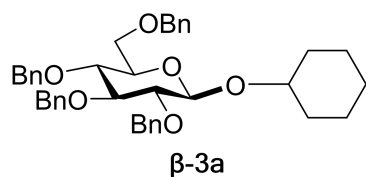

**Cyclohexanol 2,3,4,6-tetra-*O*-benzyl- $\beta$ -D-glucopyranoside  $\beta$ -3a:**

Following the general procedure of Method A using trichloroacetimidate **1a** (50 mg, 0.073 mmol, 1.5 equiv.) and acceptor cyclohexanol **2a** (4.87 mg, 0.049 mmol) in DCM (4.90 mL) at  $-40^{\circ}\text{C}$  temperature for 12 hours afforded  **$\beta$ -3a** (24 mg, 80% yield) as a white solid (eluent, Toluene–Ethyl acetate 15:1).  $[\alpha]_{\text{D}}^{21} = +16.7$  ( $c = 1.0$ ,  $\text{CHCl}_3$ );  $^1\text{H NMR}$  ( $\text{CDCl}_3$ , 400 MHz):  $\delta$  7.28–7.09 (m, 20H, ArH), 4.92 (d, 1H,  $J = 10.88$  Hz,  $\text{OCH}_2\text{Ph}$ ), 4.85 (d, 1H,  $J = 10.96$  Hz,  $\text{OCH}_2\text{Ph}$ ), 4.72 (dd, 2H,  $J = 10.88$ , 16.24 Hz,  $\text{OCH}_2\text{Ph}$ ), 4.64 (d, 1H,  $J = 10.92$  Hz,  $\text{OCH}_2\text{Ph}$ ), 4.52–4.45 (m, 3H,  $\text{OCH}_2\text{Ph}$ ), 4.43 (d, 1H,  $J = 7.8$  Hz,  $\text{C1}^{\text{Glc1-H}}$ ), 3.69–3.61 (m, 2H,  $\text{C6}^{\text{Glc1-H}}$  and  $\text{OCH}$ ), 3.60–3.54 (m, 2H,  $\text{C3}^{\text{Glc1-H}}$  and  $\text{C6}^{\text{Glc1-H}}$ ), 3.50–3.45 (m, 1H,  $\text{C4}^{\text{Glc1-H}}$ ), 3.40–3.35 (m, 2H,  $\text{C2}^{\text{Glc1-H}}$  and  $\text{C5}^{\text{Glc1-H}}$ ), 1.96–1.16 (m, 10H,  $\text{CH}_3$ );  $^{13}\text{C}\{^1\text{H}\}$  NMR ( $\text{CDCl}_3$ , 400 MHz):  $\delta$  138.7, 138.6, 138.3, 138.2, 128.4, 128.3, 128.2, 128.0, 127.9, 127.7, 127.6, 127.5, 101.9 ( $\text{C1}^{\text{Glc1}}$ ), 84.9, 82.3, 77.4, 77.0, 76.7, 74.8, 73.4, 69.2, 58.4, 33.8, 32.0, 29.7, 25.7, 24.1, 24.0, 18.4; HRMS (ESI)  $m/z$   $[\text{M}+\text{Na}]^+$  calcd for  $\text{C}_{40}\text{H}_{46}\text{O}_6\text{Na}$  645.3192, found 645.3199.

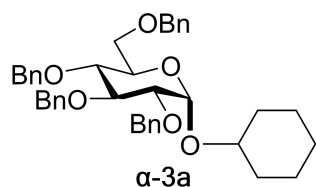

**Cyclohexanol 2,3,4,6-tetra-*O*-benzyl- $\alpha$ -D-glucopyranoside  $\alpha$ -3a:**

Following the general procedure of Method B using trichloroacetimidate **1a** (50 mg, 0.073 mmol, 1.5 equiv.) and acceptor cyclohexanol **2a** (4.87 mg, 0.049 mmol) in DCM (4.90 mL) at room temperature for 3 hours afforded  **$\alpha$ -3a** (23 mg, 76% yield) as a white solid (eluent, Toluene–Ethyl acetate 15:1).  $[\alpha]_{\text{D}}^{21} = +31.5$  ( $c = 1.0$ ,  $\text{CHCl}_3$ );  $^1\text{H NMR}$  ( $\text{CDCl}_3$ , 400 MHz):  $\delta$  7.36–7.25 (m, 20H, ArH), 4.99 (d, 1H,  $J = 10.88$  Hz,  $\text{OCH}_2\text{Ph}$ ), 4.96 (d, 1H,  $J = 3.68$  Hz,  $\text{C1}^{\text{Glc1-H}}$ ), 4.84–4.79 (m, 2H,  $\text{OCH}_2\text{Ph}$ ), 4.74 (d, 1H,  $J = 12.08$  Hz,  $\text{OCH}_2\text{Ph}$ ), 4.65 (d, 1H,  $J = 11.96$  Hz,  $\text{OCH}_2\text{Ph}$ ), 4.61 (d, 1H,  $J = 12.16$  Hz,  $\text{OCH}_2\text{Ph}$ ), 4.48 (d, 1H,  $J = 2.40$  Hz,  $\text{OCH}_2\text{Ph}$ ), 4.45 (d, 1H,  $J = 3.84$  Hz,  $\text{OCH}_2\text{Ph}$ ), 4.00 (t, 1H,  $J = 9.28$  Hz,  $\text{C3}^{\text{Glc1-H}}$ ), 3.89–3.86 (m, 1H,  $\text{OCH}_2$ ), 3.75–3.70 (m, 1H,  $\text{C6}^{\text{Glc1-H}}$ ), 3.64–3.60 (m, 2H,  $\text{C6}^{\text{Glc1-H}}$  and  $\text{C5}^{\text{Glc1-H}}$ ), 3.57–3.53 (m, 2H,  $\text{C4}^{\text{Glc1-H}}$  and  $\text{C2}^{\text{Glc1-H}}$ ), 1.86–1.33 (m, 10H,  $\text{CH}_3$ );  $^{13}\text{C}\{^1\text{H}\}$  NMR ( $\text{CDCl}_3$ , 400 MHz):  $\delta$  139.0, 138.4, 138.3, 138.1, 128.4, 128.3, 128.2, 128.1, 128.0, 127.9, 127.8, 127.7, 127.6, 127.5, 94.7 ( $\text{C1}^{\text{Glc1}}$ ), 82.1, 80.0, 78.0, 77.3, 77.0, 76.7, 75.6, 75.4, 75.1, 74.8, 73.5, 73.0, 70.1, 68.7, 33.4, 31.5, 29.7, 25.6, 24.5, 24.2; HRMS (ESI)  $m/z$   $[\text{M}+\text{Na}]^+$  calcd for  $\text{C}_{40}\text{H}_{46}\text{O}_6\text{Na}$  645.3192, found 645.3199.

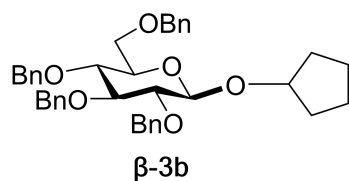

**Cyclopentanol 2,3,4,6-tetra-*O*-benzyl- $\beta$ -D-glucopyranoside  $\beta$ -3b:**

Following the general procedure of **Method A** using trichloroacetimidate **1a** (50 mg, 0.073 mmol, 1.5 equiv.) and acceptor **2b** (4.19 mg, 0.049 mmol) in DCM (4.90 mL) at  $-40^{\circ}\text{C}$  temperature for 12 hours afforded  **$\beta$ -3b** (24 mg, 80% yield) as a white solid (eluent, Toluene–Ethyl acetate 15:1).  $[\alpha]_{\text{D}}^{21} = +28.3$  ( $c = 1.0$ ,  $\text{CHCl}_3$ );  $^1\text{H NMR}$  ( $\text{CDCl}_3$ , 400 MHz):  $\delta$  7.26–7.08 (m, 20H, ArH), 4.85 (dd, 1H,  $J = 5.36, 10.92$  Hz,  $\text{OCH}_2\text{Ph}$ ), 4.83 (d, 1H,  $J = 9.96$  Hz,  $\text{OCH}_2\text{Ph}$ ), 4.74 (d, 1H,  $J = 10.84$  Hz,  $\text{OCH}_2\text{Ph}$ ), 4.70 (d, 1H,  $J = 11.00$  Hz,  $\text{OCH}_2\text{Ph}$ ), 4.62 (d, 1H,  $J = 10.92$  Hz,  $\text{OCH}_2\text{Ph}$ ), 4.55–4.45 (m, 3H,  $\text{OCH}_2\text{Ph}$ ), 4.35 (d, 1H,  $J = 7.84$  Hz,  $\text{C1}^{\text{Glc1-H}}$ ), 4.31–4.29 (m, 1H,  $\text{OCH}_2$ ), 3.67 (dd, 1H,  $J = 1.76, 10.76$  Hz,  $\text{C6}^{\text{Glc1-H}}$ ), 3.61–3.54 (m, 2H,  $\text{C6}^{\text{Glc1-H}}$  and  $\text{C3}^{\text{Glc1-H}}$ ), 3.47 (t, 1H,  $J = 9.56$  Hz,  $\text{C4}^{\text{Glc1-H}}$ ), 3.40–3.32 (m, 2H,  $\text{C5}^{\text{Glc1-H}}$  and  $\text{C2}^{\text{Glc1-H}}$ ), 1.81–1.45 (m, 8H,  $\text{CH}_2$ );  $^{13}\text{C}\{^1\text{H}\}$  NMR ( $\text{CDCl}_3$ , 400 MHz):  $\delta$  138.7, 138.6, 138.3, 138.2, 128.4, 128.2, 128.0, 127.9, 127.8, 127.7, 127.6, 102.1, 84.9, 82.3, 81.0, 78.0, 77.4, 77.0, 76.7, 75.7, 75.0, 74.9, 74.8, 73.5, 69.2, 33.6, 32.1, 29.7, 23.7, 23.4; HRMS (ESI)  $m/z$   $[\text{M}+\text{Na}]^+$  calcd for  $\text{C}_{39}\text{H}_{44}\text{O}_6\text{Na}$  631.3036, found 631.3041.

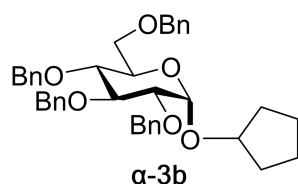

Cyclopentanol 2,3,4,6-tetra-*O*-benzyl- $\alpha$ -D-glucopyranoside  **$\alpha$ -3b**:

Following the general procedure of **Method B** using trichloroacetimidate **1a** (50 mg, 0.073 mmol, 1.5 equiv.) and acceptor **3b** (4.19 mg, 0.049 mmol) in DCM (4.90 mL) at room temperature for 3 hours afforded  **$\alpha$ -3b** (17mg, 61% yield) as a white solid (eluent, Toluene–Ethyl acetate 15:1).  $[\alpha]_{\text{D}}^{21} = +110.1$  ( $c = 1.0$ ,  $\text{CHCl}_3$ );  $^1\text{H NMR}$  ( $\text{CDCl}_3$ , 400 MHz):  $\delta$  7.36–7.12 (m, 20H, ArH), 4.99 (d, 1H,  $J = 10.88$  Hz,  $\text{OCH}_2\text{Ph}$ ), 4.86 (d, 1H,  $J = 3.64$  Hz,  $\text{C1}^{\text{Glc1-H}}$ ), 4.82 (d, 1H,  $J = 9.96$  Hz,  $\text{OCH}_2\text{Ph}$ ), 4.77 (d, 1H,  $J = 12.76$  Hz,  $\text{OCH}_2\text{Ph}$ ), 4.74 (d, 1H,  $J = 12.04$  Hz,  $\text{OCH}_2\text{Ph}$ ), 4.65–4.57 (m, 3H,  $\text{OCH}_2\text{Ph}$ ), 4.47 (d, 1H,  $J = 11.60$  Hz,  $\text{OCH}_2\text{Ph}$ ), 4.15–4.14 (m, 1H,  $\text{OCH}_2$ ), 3.97 (t, 1H,  $J = 9.28$  Hz,  $\text{C3}^{\text{Glc1-H}}$ ), 3.83–3.80 (m, 1H,  $\text{C6}^{\text{Glc1-H}}$ ), 3.74 (dd, 1H,  $J = 3.60, 10.52$  Hz,  $\text{C6}^{\text{Glc1-H}}$ ), 3.64–3.61 (m, 2H,  $\text{C5}^{\text{Glc1-H}}$  and  $\text{C4}^{\text{Glc1-H}}$ ), 3.54 (dd, 1H,  $J = 3.68, 9.60$  Hz,  $\text{C2}^{\text{Glc1-H}}$ ), 1.74–1.33 (m, 8H,  $\text{CH}_2$ );  $^{13}\text{C}\{^1\text{H}\}$  NMR ( $\text{CDCl}_3$ , 400 MHz):  $\delta$  139.0, 138.4, 138.3, 138.1, 128.4, 128.3, 128.2, 128.1, 128.0, 127.9, 127.8, 127.7, 127.6, 127.6, 127.5, 95.6 ( $\text{C1}^{\text{Glc1}}$ ), 82.1, 80.2, 79.0, 78.0, 77.9, 77.4, 77.0, 76.7, 75.6, 75.1, 75.0, 73.5, 73.0, 70.1, 68.7, 32.9, 31.7, 29.7, 23.5, 23.3; HRMS (ESI)  $m/z$   $[\text{M}+\text{Na}]^+$  calcd for  $\text{C}_{39}\text{H}_{44}\text{O}_6\text{Na}$  631.3036, 631.3041.

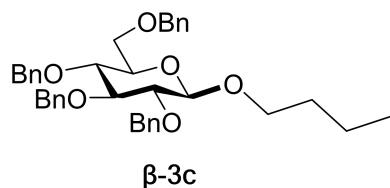

*n*-Butanol 2,3,4,6-tetra-*O*-benzyl- $\beta$ -D-glucopyranoside  **$\beta$ -3c**:

Following the general procedure of **Method A** using trichloroacetimidate **1a** (50 mg, 0.073 mmol, 1.5 equiv.) and acceptor *n*-butanol **2c** (3.61 mg, 0.049 mmol) in DCM (4.90 mL) at  $-40^{\circ}\text{C}$  temperature for 12 hours afforded  **$\beta$ -3c** (20 mg, 69% yield) as a white solid (eluent, Toluene–acetonitrile 15:1).  $[\alpha]_{\text{D}}^{21} = +23.0$  ( $c = 1.0$ ,  $\text{CHCl}_3$ );  $^1\text{H NMR}$  ( $\text{CDCl}_3$ , 400 MHz):  $\delta$  7.28–7.08 (m, 20H, ArH), 4.87 (t, 2H,  $J = 9.4$  Hz,  $\text{OCH}_2\text{Ph}$ ), 4.74 (d, 1H,  $J = 8.64$  Hz,  $\text{OCH}_2\text{Ph}$ ), 4.71 (d, 1H,  $J = 8.76$  Hz,  $\text{OCH}_2\text{Ph}$ ), 4.64 (d, 1H,  $J = 8.79$  Hz,  $\text{OCH}_2\text{Ph}$ ), 4.54 (d, 1H,  $J = 9.76$  Hz,  $\text{OCH}_2\text{Ph}$ ), 4.50–4.44 (m, 2H,  $\text{OCH}_2\text{Ph}$ ), 4.31 (d, 1H,  $J = 6.24$  Hz,  $\text{C1}^{\text{Glc1-H}}$ ), 3.92–3.87 (m, 1H,  $\text{OCH}_2$ ), 3.67 (d, 1H,  $J = 8.44$  Hz,  $\text{C6}^{\text{Glc1-H}}$ ), 3.61–3.55 (m, 2H,  $\text{C6}^{\text{Glc1-H}}$  and  $\text{C3}^{\text{Glc1-H}}$ ), 3.52–3.45 (m, 2H,  $\text{C5}^{\text{Glc1-H}}$  and  $\text{OCH}_2$ ), 3.40–3.36 (m, 2H,  $\text{C4}^{\text{Glc1-H}}$  and

C2<sup>Glc1</sup>-H), 1.61–1.54 (m, 2H, CH<sub>2</sub>), 1.39–1.33 (m, 2H, CH<sub>2</sub>), 0.86 (t, 3H, *J* = 5.88 Hz, CH<sub>3</sub>); <sup>13</sup>C{<sup>1</sup>H} NMR (CDCl<sub>3</sub>, 400 MHz): δ 138.7, 138.5, 138.2, 138.1, 128.5, 128.4, 128.3, 128.2, 127.9, 127.8, 127.7, 127.6, 103.7 (C1<sup>Glc1</sup>), 84.8, 82.3, 78.0, 77.0, 76.8, 75.7, 75.0, 74.9, 74.8, 73.5, 69.8, 69.1, 33.5, 31.9, 31.8, 29.7, 29.4, 29.3, 29.1, 24.8, 22.7, 19.3, 14.1, 13.9; HRMS (ESI) *m/z* [M+Na]<sup>+</sup> calcd for C<sub>38</sub>H<sub>44</sub>O<sub>6</sub>Na 619.3036, found 619.3038.

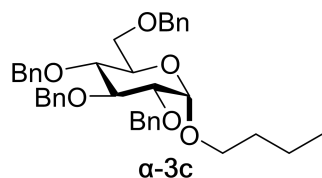

**n-Butanol 2,3,4,6-tetra-*O*-benzyl- $\alpha$ -D-glucopyranoside  $\alpha$ -3c:**

Following the general procedure of **Method B** using trichloroacetimidate **1a** (50 mg, 0.073 mmol, 1.5 equiv.) and acceptor n-butanol **2c** (3.61 mg, 0.049 mmol) in DCM (4.90 mL) at room temperature for 3 hours afforded **α-3c** (23 mg, 77% yield) as a white solid (eluent, Toluene–acetonitrile 15:1). [ $\alpha$ ]<sub>D</sub><sup>21</sup> = +204.2 (*c* = 0.2, CHCl<sub>3</sub>); <sup>1</sup>H NMR (CDCl<sub>3</sub>, 400 MHz): δ 7.36–7.13 (m, 20H, ArCH), 4.99 (d, 1H, *J* = 10.88 Hz, OCH<sub>2</sub>Ph), 4.84–4.79 (m, 3H, OCH<sub>2</sub>Ph), 4.75 (d, 1H, *J* = 2.44 Hz, C1<sup>Glc1</sup>-H), 4.62 (dd, 2H, *J* = 12.12, 16.40 Hz, OCH<sub>2</sub>Ph), 4.48–4.45 (m, 2H, OCH<sub>2</sub>Ph), 3.98 (t, 1H, *J* = 9.28 Hz, C3<sup>Glc1</sup>-H), 3.79–3.76 (m, 1H, OCH<sub>2</sub>), 3.72 (dd, 1H, *J* = 3.76, 10.56 Hz, C6<sup>Glc1</sup>-H), 3.66–3.60 (m, 3H, C6<sup>Glc1</sup>-H, C4<sup>Glc1</sup>-H and OCH<sub>2</sub>), 3.55 (dd, 1H, *J* = 3.64, 9.64 Hz, C2<sup>Glc1</sup>-H), 3.45–3.39 (m, 1H, C5<sup>Glc1</sup>-H), 1.63–1.58 (m, 2H, CH<sub>2</sub>), 1.42–1.33 (m, 2H, CH<sub>2</sub>), 0.91 (t, 3H, *J* = 7.36 Hz, CH<sub>3</sub>); <sup>13</sup>C{<sup>1</sup>H} NMR (CDCl<sub>3</sub>, 400 MHz): δ 139.0, 138.4, 138.3, 138.0, 128.4, 128.3, 128.2, 128.1, 127.9, 129.0, 127.8, 127.7, 127.5, 96.9 (C1<sup>Glc1</sup>), 82.1, 80.2, 77.8, 77.4, 77.0, 76.7, 75.7, 75.1, 73.5, 73.1, 70.1, 68.6, 67.9, 31.9, 31.5, 29.7, 29.4, 22.7, 19.4, 14.1, 13.9; HRMS (ESI) *m/z* [M+Na]<sup>+</sup> calcd for C<sub>38</sub>H<sub>44</sub>O<sub>6</sub>Na 619.3036, found 619.3038.

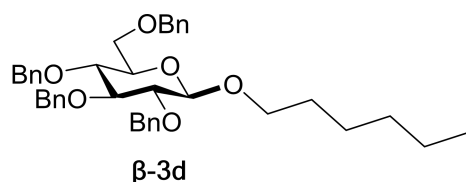

**n-Hexanol 2,3,4,6-tetra-*O*-benzyl- $\beta$ -D-glucopyranoside  $\beta$ -3d:**

Following the general procedure of **Method A** using trichloroacetimidate **1a** (50 mg, 0.073 mmol, 1.5 equiv.) and acceptor **3d** (4.97 mg, 0.049 mmol) in DCM (4.90 mL) at –40°C temperature for 12 hours afforded **β-3d** (24 mg, 81% yield) as a white solid (eluent, Toluene–Ethyl acetate 30:1). [ $\alpha$ ]<sub>D</sub><sup>21</sup> = –1.2 (*c* = 1.0, CHCl<sub>3</sub>); <sup>1</sup>H NMR (CDCl<sub>3</sub>, 400 MHz): δ 7.28–7.08 (m, 20H, ArH), 4.87 (t, 2H, *J* = 10.92 Hz, OCH<sub>2</sub>Ph), 4.76–4.70 (m, 2H, OCH<sub>2</sub>Ph), 4.64 (d, 1H, *J* = 10.96 Hz, OCH<sub>2</sub>Ph), 4.56–4.41 (m, 3H, OCH<sub>2</sub>Ph), 4.31 (d, 1H, *J* = 7.80 Hz, C1<sup>Glc1</sup>-H), 3.92–3.86 (m, 1H, OCH<sub>2</sub>), 3.68–3.66 (m, 1H, C6<sup>Glc1</sup>-H), 3.62–3.43 (m, 4H, C6<sup>Glc1</sup>-H, C3<sup>Glc1</sup>-H, C5<sup>Glc1</sup>-H and OCH<sub>2</sub>), 3.41–3.35 (m, 2H, C4<sup>Glc1</sup>-H and C2<sup>Glc1</sup>-H), 1.62–1.53 (m, 4H, CH<sub>2</sub>), 1.35–1.22 (m, 4H, CH<sub>2</sub>), 0.81 (t, 3H, *J* = 6.80 Hz, CH<sub>3</sub>); <sup>13</sup>C{<sup>1</sup>H} NMR (CDCl<sub>3</sub>, 400 MHz): δ 138.7, 138.6, 138.3, 138.2, 128.4, 128.2, 128.0, 127.9, 127.8, 127.6, 127.5, 103.7 (C1<sup>Glc1</sup>), 84.8, 82.3, 78.0, 77.3, 77.0, 76.7, 75.7, 75.0, 74.9, 74.8, 73.5, 70.2, 69.1, 31.7, 29.8, 29.7, 25.9, 22.6, 14.1; HRMS (ESI) *m/z* [M+Na]<sup>+</sup> calcd for C<sub>40</sub>H<sub>48</sub>O<sub>6</sub>Na 647.3349, found 647.3355.

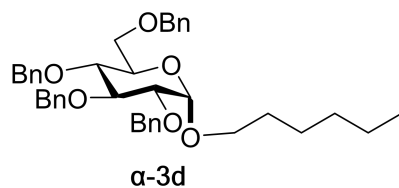

**n-Hexanol 2,3,4,6-tetra-*O*-benzyl- $\alpha$ -D-glucopyranoside  $\alpha$ -3d:**

Following the general procedure of **Method B** using trichloroacetimidate **1a** (50 mg, 0.073 mmol, 1.5 equiv.) and acceptor **3d** (4.97 mg, 0.049 mmol) in DCM (4.90 mL) at room temperature for 3 hours afforded  **$\alpha$ -3d** (24 mg, 80% yield) as a white solid (eluent, Toluene–Ethyl acetate 30:1).  $[\alpha]_D^{21} = +27.0$  ( $c = 1.0$ ,  $\text{CHCl}_3$ );  $^1\text{H NMR}$  ( $\text{CDCl}_3$ , 400 MHz):  $\delta$  7.36–7.12 (m, 20H, ArH), 5.00 (d, 1H,  $J = 10.88$  Hz,  $\text{OCH}_2\text{Ph}$ ), 4.84–4.76 (m, 3H,  $\text{OCH}_2\text{Ph}$ ), 4.75 (d, 1H,  $J = 3.72$  Hz,  $\text{C1}^{\text{Glc-H}}$ ), 4.64 (d, 1H,  $J = 12.12$  Hz,  $\text{OCH}_2\text{Ph}$ ), 4.60 (d, 1H,  $J = 12.12$  Hz,  $\text{OCH}_2\text{Ph}$ ), 4.46 (d, 2H,  $J = 11.52$  Hz,  $\text{OCH}_2\text{Ph}$ ), 3.99 (d, 1H,  $J = 9.24$  Hz,  $\text{C3}^{\text{Glc-H}}$ ), 3.79–3.76 (m, 1H,  $\text{OCH}_2$ ), 3.72 (dd, 1H,  $J = 3.60, 10.48$  Hz,  $\text{C6}^{\text{Glc-H}}$ ), 3.65–3.59 (m, 3H,  $\text{OCH}_2$ ,  $\text{C4}^{\text{Glc-H}}$  and  $\text{C6}^{\text{Glc-H}}$ ), 3.55 (dd, 1H,  $J = 3.68, 9.68$  Hz,  $\text{C2}^{\text{Glc-H}}$ ), 3.46–3.39 (m, 1H,  $\text{C5}^{\text{Glc-H}}$ ), 1.65–1.56 (m, 4H,  $\text{CH}_2$ ), 1.35–1.25 (m, 4H,  $\text{CH}_2$ ), 0.88 (t, 3H,  $J = 6.72$  Hz,  $\text{CH}_3$ );  $^{13}\text{C}\{^1\text{H}\}$  NMR ( $\text{CDCl}_3$ , 400 MHz):  $\delta$  140.0, 138.7, 138.6, 138.3, 138.2, 138.1, 128.4, 128.2, 128.0, 127.9, 127.8, 127.7, 127.6, 127.5, 127.4, 103.7, 96.9, 84.8, 82.3, 82.1, 80.2, 80.0, 78.00, 77.8, 77.4, 77.0, 76.7, 75.7, 75.1, 75.0, 74.9, 74.8, 73.5, 73.1, 70.2, 70.1, 69.1, 68.6, 68.3, 31.7, 29.8, 29.4, 25.9, 22.6, 22.5; HRMS (ESI)  $m/z$   $[\text{M}+\text{Na}]^+$  calcd for  $\text{C}_{40}\text{H}_{48}\text{O}_6\text{Na}$  647.3349, found 647.3355.

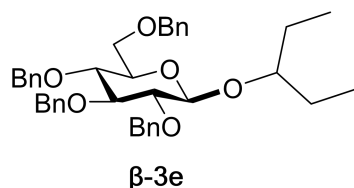

**Isoamyl 2,3,4,6-tetra-*O*-benzyl- $\beta$ -D-glucopyranoside  $\beta$ -3e:**

Following the general procedure of **Method A** using trichloroacetimidate **1a** (50 mg, 0.073 mmol, 1.5 equiv.) and acceptor **3e** (4.29 mg, 0.049 mmol) in DCM (4.90 mL) at  $-40^\circ\text{C}$  temperature for 12 hours afforded  **$\beta$ -3e** (25 mg, 82% yield) as a white solid (eluent, Toluene–Ethyl acetate 15:1).  $[\alpha]_D^{21} = +24.9$  ( $c = 1.0$ ,  $\text{CHCl}_3$ );  $^1\text{H NMR}$  ( $\text{CDCl}_3$ , 400 MHz):  $\delta$  7.26–7.13 (m, 20H, ArH), 4.91 (d, 1H,  $J = 10.92$  Hz,  $\text{OCH}_2\text{Ph}$ ), 4.85 (d, 1H,  $J = 10.86$  Hz,  $\text{OCH}_2\text{Ph}$ ), 4.73 (dd, 2H,  $J = 13.64, 2.76$  Hz,  $\text{OCH}_2\text{Ph}$ ), 4.64 (d, 1H,  $J = 10.92$  Hz,  $\text{OCH}_2\text{Ph}$ ), 4.56–4.48 (m, 3H,  $\text{OCH}_2\text{Ph}$ ), 4.37 (d, 1H,  $J = 7.76$  Hz,  $\text{C1}^{\text{Glc1-H}}$ ), 3.68–3.64 (m, 1H,  $\text{C6}^{\text{Glc1-H}}$ ), 3.62–3.57 (m, 2H,  $\text{C6}^{\text{Glc1-H}}$  and  $\text{C3}^{\text{Glc1-H}}$ ), 3.54–3.47 (m, 2H,  $\text{OCH}_2$  and  $\text{C5}^{\text{Glc1-H}}$ ), 3.39–3.35 (m, 2H,  $\text{C4}^{\text{Glc1-H}}$  and  $\text{C2}^{\text{Glc1-H}}$ ), 1.59–1.50 (m, 4H,  $\text{CH}_2$ ), 0.91–0.79 (m, 6H,  $\text{CH}_3$ );  $^{13}\text{C}\{^1\text{H}\}$  NMR ( $\text{CDCl}_3$ , 400 MHz):  $\delta$  138.8, 138.6, 138.5, 138.2, 128.4, 128.3, 128.2, 128.0, 127.8, 127.6, 127.5, 102.6 ( $\text{C1}^{\text{Glc1}}$ ), 85.0, 82.5, 82.0, 78.1, 77.3, 77.0, 76.7, 75.7, 75.0, 74.9, 73.5, 69.2, 29.7, 27.0, 26.0, 9.7, 9.5; HRMS (ESI)  $m/z$   $[\text{M}+\text{Na}]^+$  calcd for  $\text{C}_{39}\text{H}_{46}\text{O}_6\text{Na}$  633.3192, found 633.3199.

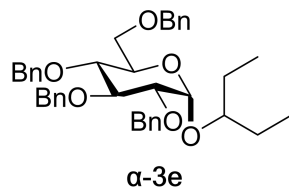

**Isoamyl 2,3,4,6-tetra-*O*-benzyl- $\alpha$ -D-glucopyranoside  $\alpha$ -3e:**

Following the general procedure of **Method B** using trichloroacetimidate **1a** (50 mg, 0.073 mmol, 1.5 equiv.) and acceptor **3e** (4.29 mg, 0.049 mmol) in DCM (4.90 mL) at room temperature for 4 hours

afforded ***α*-3e** (24 mg, 80% yield) as a white solid (eluent, Toluene–Ethyl acetate 15:1).  $[\alpha]_D^{21} = +19.4$  ( $c = 1.0$ ,  $\text{CHCl}_3$ );  $^1\text{H NMR}$  ( $\text{CDCl}_3$ , 400 MHz):  $\delta$  7.27–7.06 (m, 20H, ArH), 4.91 (d, 1H,  $J = 10.88$  Hz,  $\text{OCH}_2\text{Ph}$ ), 4.89 (d, 1H,  $J = 3.64$  Hz,  $\text{C1}^{\text{Glc1-H}}$ ), 4.76 (d, 1H,  $J = 7.48$  Hz,  $\text{OCH}_2\text{Ph}$ ), 4.73 (d, 1H,  $J = 7.68$  Hz,  $\text{OCH}_2\text{Ph}$ ), 4.64–4.62 (m, 2H,  $\text{OCH}_2\text{Ph}$ ), 4.54 (d, 1H,  $J = 12.08$  Hz,  $\text{OCH}_2\text{Ph}$ ), 4.42–4.37 (m, 2H,  $\text{OCH}_2\text{Ph}$ ), 3.92 (t, 1H,  $J = 9.32$  Hz,  $\text{C3}^{\text{Glc1-H}}$ ), 3.84–3.82 (m, 1H,  $\text{OCH}_2$ ), 3.66 (dd, 1H,  $J = 3.56$ , 10.52 Hz,  $\text{C6}^{\text{Glc1-H}}$ ), 3.58–3.54 (m, 2H,  $\text{C6}^{\text{Glc1-H}}$  and  $\text{C4}^{\text{Glc1-H}}$ ), 3.51–3.47 (m, 1H,  $\text{C2}^{\text{Glc1-H}}$ ), 3.44–3.35 (m, 1H,  $\text{C5}^{\text{Glc1-H}}$ ), 1.59–1.44 (m, 4H,  $\text{CH}_2$ ), 0.91–0.81 (m, 6H,  $\text{CH}_3$ );  $^{13}\text{C}\{^1\text{H}\}$  NMR ( $\text{CDCl}_3$ , 400 MHz):  $\delta$  139.0, 138.4, 138.3, 138.1, 128.4, 128.2, 128.1, 128.0, 127.9, 127.8, 127.7, 127.6, 127.5, 95.6, 82.1, 80.2, 78.0, 77.3, 77.0, 76.7, 75.1, 73.2, 70.4, 68.6, 29.7, 26.6, 26.0, 25.1, 10.2, 9.2; HRMS (ESI)  $m/z$   $[\text{M}+\text{Na}]^+$  calcd for  $\text{C}_{39}\text{H}_{46}\text{O}_6\text{Na}$  633.3192, found 633.3199.

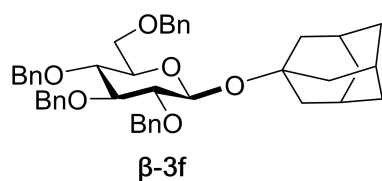

**Adamantyl 2,3,4,6-tetra-*O*-benzyl-*β*-D-glucopyranoside *β*-3f:**

Following the general procedure of **Method A** using trichloroacetimidate **1a** (50 mg, 0.073 mmol, 1.5 equiv.) and acceptor 1-admantanol **2f** (7.46 mg, 0.049 mmol) in DCM (4.90 mL) at  $-40^\circ\text{C}$  temperature for 12 hours afforded ***β*-3f** (29 mg, 88% yield) as a white solid (eluent, Toluene–Ethyl acetate 30:1).  $[\alpha]_D^{21} = -21.6$  ( $c = 1.0$ ,  $\text{CHCl}_3$ );  $^1\text{H NMR}$  ( $\text{CDCl}_3$ , 400 MHz):  $\delta$  7.29–7.11 (m, 20H, ArH), 4.93 (d, 1H,  $J = 11.00$  Hz,  $\text{OCH}_2\text{Ph}$ ), 4.83 (d, 1H,  $J = 10.92$  Hz,  $\text{OCH}_2\text{Ph}$ ), 4.74 (d, 1H,  $J = 10.92$  Hz,  $\text{OCH}_2\text{Ph}$ ), 4.69 (d, 1H,  $J = 10.92$  Hz,  $\text{OCH}_2\text{Ph}$ ), 4.64 (d, 1H,  $J = 7.32$  Hz,  $\text{C1}^{\text{Glc1-H}}$ ), 4.61 (d, 1H,  $J = 4.16$  Hz,  $\text{OCH}_2\text{Ph}$ ), 4.53–4.45 (m, 3H,  $\text{OCH}_2\text{Ph}$ ), 3.65 (dd, 1H,  $J = 1.56$ , 10.84 Hz,  $\text{C6}^{\text{Glc1-H}}$ ), 3.59–3.52 (m, 2H,  $\text{C4}^{\text{Glc1-H}}$  and  $\text{C6}^{\text{Glc1-H}}$ ), 3.46–3.34 (m, 3H,  $\text{C3}^{\text{Glc1-H}}$ ,  $\text{C2}^{\text{Glc1-H}}$  and  $\text{C5}^{\text{Glc1-H}}$ ), 2.07 (s, 3H,  $\text{CH}_3$ ), 1.88–1.75 (m, 6H,  $\text{CH}_3$ ), 1.59–1.52 (m, 6H,  $\text{CH}_3$ );  $^{13}\text{C}\{^1\text{H}\}$  NMR ( $\text{CDCl}_3$ , 400 MHz):  $\delta$  138.7, 138.6, 138.4, 138.2, 128.5, 128.4, 128.3, 128.2, 128.0, 127.9, 127.7, 127.6, 127.5, 127.4, 96.3 ( $\text{C1}^{\text{Glc1}}$ ), 85.2, 82.4, 78.3, 77.4, 77.1, 76.7, 75.7, 75.3, 75.0, 74.6, 73.4, 69.6, 42.8, 36.3, 30.7, 30.7, 29.7; HRMS (ESI)  $m/z$   $[\text{M}+\text{Na}]^+$  calcd for  $\text{C}_{44}\text{H}_{50}\text{O}_6\text{Na}$  697.3505, found 697.3508.

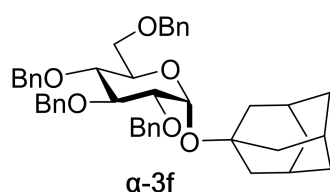

**Adamantyl 2,3,4,6-tetra-*O*-benzyl-*α*-D-glucopyranoside *α*-3f:**

Following the general procedure of **Method B** using trichloroacetimidate **1a** (50 mg, 0.073 mmol, 1.5 equiv.) and acceptor 1-admantanol **2f** (7.46 mg, 0.049 mmol) in DCM (4.90 mL) at room temperature for 3 hours afforded ***α*-3f** (26 mg, 80% yield) as a white solid (eluent, Toluene–Ethyl acetate 30:1).  $^1\text{H NMR}$  ( $\text{CDCl}_3$ , 400 MHz):  $\delta$  7.35–7.30 (m, 20H, ArH), 5.29 (d, 1H,  $J = 4.12$  Hz,  $\text{C1}^{\text{Glc1-H}}$ ), 5.00 (d, 1H,  $J = 11.00$  Hz,  $\text{OCH}_2\text{Ph}$ ), 4.83 (t, 2H,  $J = 11.00$  Hz,  $\text{OCH}_2\text{Ph}$ ), 4.69–4.63 (m, 3H,  $\text{OCH}_2\text{Ph}$ ), 4.48–4.44 (m, 2H,  $\text{OCH}_2\text{Ph}$ ), 4.05–4.00 (m, 2H,  $\text{C3}^{\text{Glc1-H}}$  and  $\text{C5}^{\text{Glc1-H}}$ ), 3.76 (dd, 1H,  $J = 3.68$ , 6.88 Hz,  $\text{C6}^{\text{Glc1-H}}$ ), 3.69–3.60 (m, 2H,  $\text{C4}^{\text{Glc1-H}}$  and  $\text{C6}^{\text{Glc1-H}}$ ), 3.54 (dd, 1H,  $J = 3.68$ , 10.00 Hz,  $\text{C2}^{\text{Glc1-H}}$ ), 2.14 (s, 3H,  $\text{CH}_3$ ), 1.88–1.83 (m, 6H,  $\text{CH}_3$ ), 1.62–1.59 (m, 6H,  $\text{CH}_3$ );  $^{13}\text{C}\{^1\text{H}\}$  NMR ( $\text{CDCl}_3$ , 400 MHz):  $\delta$  139.2, 138.5, 138.4, 128.5, 128.4, 128.0, 89.9 ( $\text{C1}^{\text{Glc1}}$ ), 82.2, 80.2, 78.2, 77.5, 77.1, 76.8, 74.7, 69.7,

69.7, 68.8, 42.5, 36.4, 30.7; HRMS (ESI)  $m/z$   $[M+Na]^+$  calcd for  $C_{44}H_{50}O_6Na$  697.3505, found 697.3508.

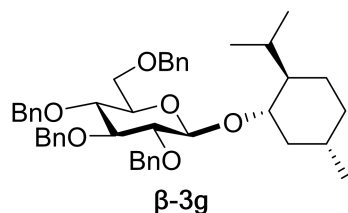

(L)-Menthyl 2,3,4,6-tetra-*O*-benzyl- $\beta$ -D-glucopyranoside  **$\beta$ -3g**:

Following the general procedure of **Method A** using trichloroacetimidate **1a** (50 mg, 0.073 mmol, 1.5 equiv.) and acceptor (L)-menthyl **3g** (7.60 mg, 0.049 mmol) in DCM (4.90 mL) at  $-40^\circ\text{C}$  temperature for 12 hours afforded  **$\beta$ -3g** (27 mg, 82% yield) as a white solid (eluent, Toluene–Ethyl acetate 15:1).  $[\alpha]_D^{21} = -15.5$  ( $c = 1.0$ ,  $\text{CHCl}_3$ );  $^1\text{H NMR}$  ( $\text{CDCl}_3$ , 400 MHz):  $\delta$  7.28–7.11 (m, 20H, ArH), 4.86 (t, 2H,  $J = 10.68$  Hz,  $\text{OCH}_2\text{Ph}$ ), 4.73 (t, 2H,  $J = 11.24$  Hz,  $\text{OCH}_2\text{Ph}$ ), 4.61 (d, 1H,  $J = 10.92$  Hz,  $\text{OCH}_2\text{Ph}$ ), 4.55–4.45 (m, 3H,  $\text{OCH}_2\text{Ph}$ ), 4.40 (d, 1H,  $J = 7.80$  Hz,  $\text{C1}^{\text{Glc1-H}}$ ), 3.63–3.58 (m, 2H,  $\text{C5}^{\text{Glc1-H}}$  and  $\text{C6}^{\text{Glc1-H}}$ ), 3.56–3.50 (m, 2H,  $\text{C3}^{\text{Glc1-H}}$  and  $\text{C6}^{\text{Glc1-H}}$ ), 3.46–3.40 (m, 1H, OCH), 3.56–3.32 (m, 2H,  $\text{C2}^{\text{Glc1-H}}$  and  $\text{C4}^{\text{Glc1-H}}$ ), 2.29–2.26 (m, 1H,  $\text{CH}_2$ ), 2.06 (d, 1H,  $J = 9.00$  Hz,  $\text{CH}_2$ ), 1.60–1.57 (m, 3H,  $\text{CH}_2$ ), 0.86–0.74 (m, 13H,  $\text{CH}_3$ );  $^{13}\text{C}\{^1\text{H}\}$  NMR ( $\text{CDCl}_3$ , 400 MHz):  $\delta$  128.6, 128.5, 128.4, 128.2, 127.9, 127.8, 127.6, 100.9 ( $\text{C1}^{\text{Glc1}}$ ), 82.4, 78.1, 77.5, 77.2, 76.8, 75.7, 75.1, 75.0, 73.8, 48.3, 31.6, 29.9, 22.4, 21.2, 16.1; HRMS (ESI)  $m/z$   $[M+Na]^+$  calcd for  $C_{44}H_{54}O_6Na$  701.3818, found 701.3826.

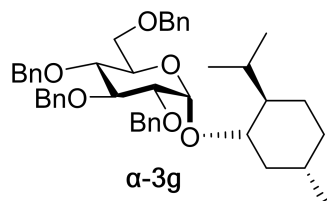

(L)-Menthyl 2,3,4,6-tetra-*O*-benzyl- $\alpha$ -D-glucopyranoside  **$\alpha$ -3g**:

Following the general procedure of **Method B** using trichloroacetimidate **1a** (50 mg, 0.073 mmol, 1.5 equiv.) and acceptor (L)-menthyl **3g** (7.60 mg, 0.049 mmol) in DCM (4.90 mL) at room temperature for 3 hours afforded  **$\alpha$ -3g** (53 mg, 81% yield) as a white solid (eluent, Toluene–Ethyl acetate 15:1).  $[\alpha]_D^{21} = +31.5$  ( $c = 1.0$ ,  $\text{CHCl}_3$ );  $^1\text{H NMR}$  ( $\text{CDCl}_3$ , 400 MHz):  $\delta$  7.33–7.14 (m, 20H, ArH), 5.02 (d, 1H,  $J = 3.68$  Hz,  $\text{C1}^{\text{Glc1-H}}$ ), 4.98 (d, 1H,  $J = 11.00$  Hz,  $\text{OCH}_2\text{Ph}$ ), 4.84 (d, 1H,  $J = 5.96$  Hz,  $\text{OCH}_2\text{Ph}$ ), 4.82 (d, 1H,  $J = 5.96$  Hz,  $\text{OCH}_2\text{Ph}$ ), 4.73–4.63 (m, 3H,  $\text{OCH}_2\text{Ph}$ ), 4.49–4.44 (m, 2H,  $\text{OCH}_2\text{Ph}$ ), 4.04–3.96 (m, 2H,  $\text{C3}^{\text{Glc1-H}}$  and  $\text{C5}^{\text{Glc1-H}}$ ), 3.75 (dd, 1H,  $J = 4.12, 10.56$  Hz,  $\text{C6}^{\text{Glc1-H}}$ ), 3.66–3.61 (m, 2H,  $\text{C4}^{\text{Glc1-H}}$  and  $\text{C6}^{\text{Glc1-H}}$ ), 3.56–3.53 (m, 1H,  $\text{C2}^{\text{Glc1-H}}$ ), 3.39–3.32 (m, 1H, OCH), 2.45–2.39 (m, 1H,  $\text{CH}_2$ ), 2.12 (d, 1H,  $J = 12.35$  Hz,  $\text{CH}_2$ ), 1.63–1.57 (m, 3H,  $\text{CH}_2$ ), 1.38–1.26 (m, 2H,  $\text{CH}_2$ ), 1.08–0.97 (m, 7H,  $\text{CH}_3$ ), 0.72–0.70 (d, 3H,  $J = 6.88$  Hz,  $\text{CH}_3$ );  $^{13}\text{C}\{^1\text{H}\}$  NMR ( $\text{CDCl}_3$ , 400 MHz):  $\delta$  139.0, 138.4, 138.1, 128.5, 128.0, 127.7, 98.7 ( $\text{C1}^{\text{Glc1}}$ ), 82.1, 81.1, 80.6, 78.2, 77.5, 77.1, 76.8, 70.4, 68.7, 48.9, 43.2, 34.4, 31.8, 24.7, 23.0, 22.4, 21.2, 16.2; HRMS (ESI)  $m/z$   $[M+Na]^+$  calcd for  $C_{44}H_{54}O_6Na$  701.3818, found 701.3826.



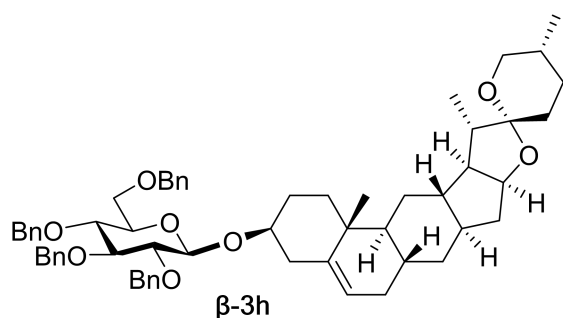

**3-O-[2,3,4,6-tetra-O-benzyl- $\beta$ -D-glucopyranoside]diosgenin  $\beta$ -3h:**

Following the general procedure of **Method A** using trichloroacetimidate **1a** (50 mg, 0.073 mmol, 1.5 equiv.) and acceptor diosgenin **2h** (20.3 mg, 0.049 mmol) in DCM (4.90 mL) at  $-40^{\circ}\text{C}$  temperature for 12 hours afforded  **$\beta$ -3h** (28 mg, 60% yield) as a white solid (eluent, Toluene–Ethyl acetate 15:1).  $[\alpha]_{\text{D}}^{21} = -11.2$  ( $c = 0.5$ ,  $\text{CHCl}_3$ );  $^1\text{H NMR}$  ( $\text{CDCl}_3$ , 400 MHz):  $\delta$  7.29–7.09 (m, 20H, ArH), 5.26 (d, 1H,  $J = 4.72$  Hz,  $\text{CH}=\text{CH}_2$ ), 4.90 (d, 1H,  $J = 10.88$  Hz,  $\text{OCH}_2\text{Ph}$ ), 4.85 (d, 1H,  $J = 10.92$  Hz,  $\text{OCH}_2\text{Ph}$ ), 4.75–4.63 (m, 3H,  $\text{OCH}_2\text{Ph}$ ), 4.52–4.45 (m, 3H,  $\text{OCH}_2\text{Ph}$ ), 4.42 (d, 1H,  $J = 7.84$  Hz,  $\text{C1}^{\text{Glc1-H}}$ ), 4.39–4.31 (m, 1H, OCH), 3.67–3.64 (m, 1H,  $\text{C6}^{\text{Glc1-H}}$ ), 3.59–3.45 (m, 4H,  $\text{C6}^{\text{Glc1-H}}$ ,  $\text{C3}^{\text{Glc1-H}}$ ,  $\text{C5}^{\text{Glc1-H}}$  and OCH), 3.41–3.28 (m, 4H,  $\text{C4}^{\text{Glc1-H}}$ ,  $\text{C2}^{\text{Glc1-H}}$ , OCH and OCH), 2.36–0.71 (m, 34H, diosgeninyl);  $^{13}\text{C}\{^1\text{H}\}$  NMR ( $\text{CDCl}_3$ , 400 MHz):  $\delta$  140.6, 138.7, 138.5, 138.3, 138.1, 128.4, 128.3, 128.0, 127.9, 127.7, 121.6, 109.3, 102.2 ( $\text{C1}^{\text{Glc1}}$ ), 84.8, 82.4, 80.8, 79.6, 78.0, 77.3, 77.0, 76.7, 75.7, 75.0, 74.8, 73.4, 69.2, 66.9, 62.1, 56.5, 50.1, 41.6, 40.3, 39.8, 39.1, 37.3, 36.9, 31.5, 31.4, 30.3, 29.7, 28.8, 20.9, 19.5, 17.2, 16.3, 14.5; HRMS (ESI)  $m/z$   $[\text{M}+\text{Na}]^+$  calcd for  $\text{C}_{60}\text{H}_{74}\text{O}_8\text{Na}$  945.5281, found 945.5288.

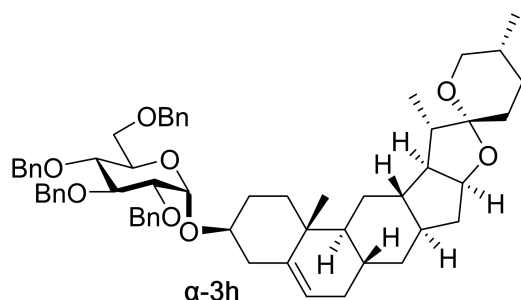

**3-O-[2,3,4,6-tetra-O-benzyl- $\alpha$ -D-glucopyranoside]diosgenin  $\alpha$ -3h:**

Following the general procedure of **Method B** using trichloroacetimidate **1a** (50 mg, 0.073 mmol, 1.5 equiv.) and acceptor diosgenin **2h** (18.8 mg, 0.049 mmol) in DCM (4.90 mL) at room temperature for 3 hours afforded  **$\alpha$ -3h** (38 mg, 85% yield) as a white solid (eluent, Toluene–Ethyl acetate 15:1).  $^1\text{H NMR}$  ( $\text{CDCl}_3$ , 400 MHz):  $\delta$  7.35–7.13 (m, 20H, ArH), 5.28 (d, 1H,  $J = 5.04$  Hz,  $\text{CH}=\text{CH}_2$ ), 5.01 (d, 1H,  $J = 11.00$  Hz,  $\text{OCH}_2\text{Ph}$ ), 4.93 (d, 1H,  $J = 3.68$  Hz,  $\text{C1}^{\text{Glc1-H}}$ ), 4.85–4.76 (m, 3H,  $\text{OCH}_2\text{Ph}$ ), 4.63 (dd, 2H,  $J = 3.68$ , 12.36 Hz,  $\text{OCH}_2\text{Ph}$ ), 4.48–4.39 (m, 3H,  $\text{OCH}_2\text{Ph}$  and OCH), 4.00 (t, 1H,  $J = 9.60$  Hz,  $\text{C3}^{\text{Glc1-H}}$ ), 3.88 (d, 1H,  $J = 10.08$  Hz,  $\text{C5}^{\text{Glc1-H}}$ ), 3.74 (dd, 1H,  $J = 3.64$ , 6.88 Hz,  $\text{C6}^{\text{Glc1-H}}$ ), 3.66–3.61 (m, 2H,  $\text{C6}^{\text{Glc1-H}}$  and  $\text{C4}^{\text{Glc1-H}}$ ), 3.55 (dd, 1H,  $J = 3.68$ , 9.64 Hz,  $\text{C2}^{\text{Glc1-H}}$ ), 3.50–3.35 (m, 3H, OCH), 2.42–0.75 (m, 34H, diosgeninyl);  $^{13}\text{C}\{^1\text{H}\}$  NMR ( $\text{CDCl}_3$ , 400 MHz):  $\delta$  141.0, 139.0, 138.4, 138.0, 128.5, 128.4, 128.0, 121.6, 109.4, 94.7 ( $\text{C1}^{\text{Glc1}}$ ), 82.2, 80.9, 80.0, 78.0, 77.5, 77.1, 76.8, 76.5, 73.5, 70.1, 66.9, 62.2, 56.6, 50.1, 41.7, 40.4, 39.9, 39.9, 37.0, 32.0, 31.5, 30.4, 28.9, 27.5, 20.9, 19.5, 17.3, 16.4, 14.7; HRMS (ESI)  $m/z$   $[\text{M}+\text{Na}]^+$  calcd for  $\text{C}_{60}\text{H}_{74}\text{O}_8\text{Na}$  945.5281, found 945.5288.

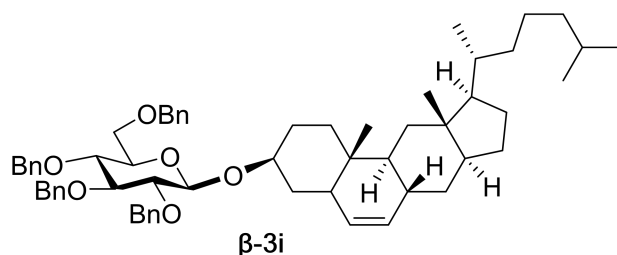

**3-O-[2,3,4,6-tetra-O-benzyl- $\beta$ -D-glucopyranoside]cholesterol  $\beta$ -3i:**

Following the general procedure of **Method A** using trichloroacetimidate **1a** (50 mg, 0.073 mmol, 1.5 equiv.) and acceptor cholesterol **2i** (18.8 mg, 0.049 mmol) in DCM (4.90 mL) at  $-40^{\circ}\text{C}$  temperature for 12 hours afforded  **$\beta$ -3i** (34 mg, 76% yield) as a white solid (eluent, Toluene–Ethyl acetate 15:1).  $[\alpha]_{\text{D}}^{21} = -20.2$  ( $c = 1.0$ ,  $\text{CHCl}_3$ );  $^1\text{H NMR}$  ( $\text{CDCl}_3$ , 400 MHz):  $\delta$  7.29–7.09 (m, 20H, ArH), 5.28–5.22 (m, 1H,  $\text{CH}=\text{CH}_2$ ), 4.90 (d, 1H,  $J = 10.88$  Hz,  $\text{OCH}_2\text{Ph}$ ), 4.85 (d, 1H,  $J = 10.96$  Hz,  $\text{OCH}_2\text{Ph}$ ), 4.77–4.63 (m, 3H,  $\text{OCH}_2\text{Ph}$ ), 4.55–4.44 (m, 3H,  $\text{OCH}_2\text{Ph}$ ), 4.40 (d, 1H,  $J = 9.48$  Hz,  $\text{C1}^{\text{Glc1-H}}$ ), 3.67–3.65 (m, 1H,  $\text{C6}^{\text{Glc1-H}}$ ), 3.59–3.45 (m, 4H,  $\text{C3}^{\text{Glc1-H}}$ ,  $\text{C6}^{\text{Glc1-H}}$ ,  $\text{C5}^{\text{Glc1-H}}$  and OCH), 3.39–3.35 (m, 2H,  $\text{C4}^{\text{Glc1-H}}$  and  $\text{C2}^{\text{Glc1-H}}$ ), 2.35–0.79 (m, 43H, cholesteryl);  $^{13}\text{C NMR}$  ( $\text{CDCl}_3$ , 400 MHz):  $\delta$  140.6, 138.7, 138.6, 138.3, 138.2, 128.4, 128.3, 128.0, 127.9, 127.7, 121.9, 102.3 ( $\text{C1}^{\text{Glc1}}$ ), 84.9, 82.4, 79.7, 78.0, 77.4, 77.0, 76.7, 74.7, 75.0, 75.0, 74.8, 73.4, 69.2, 56.8, 56.2, 50.2, 42.4, 39.8, 39.6, 36.8, 35.8, 32.0, 31.9, 30.0, 29.7, 28.3, 28.0, 24.3, 23.8, 22.8, 22.6, 21.1, 19.4, 18.8, 11.9; HRMS (ESI)  $m/z$   $[\text{M}+\text{Na}]^+$  calcd for  $\text{C}_{61}\text{H}_{80}\text{O}_6\text{Na}$  931.5853, found 931.5860.

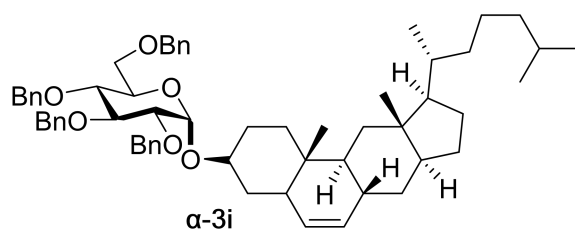

**3-O-[2,3,4,6-tetra-O-benzyl- $\alpha$ -D-glucopyranoside]cholesterol  $\alpha$ -3i:**

Following the general procedure of **Method B** using trichloroacetimidate **1a** (50 mg, 0.073 mmol, 1.5 equiv.) and acceptor cholesterol **2i** (20.3 mg, 0.049 mmol) in DCM (4.90 mL) at room temperature for 3 hours afforded  **$\alpha$ -3i** (38 mg, 82% yield) as a white solid (eluent, Toluene–Ethyl acetate 15:1).  $^1\text{H NMR}$  ( $\text{CDCl}_3$ , 400 MHz):  $\delta$  7.36–7.15 (m, 20H, ArH), 5.29 (d, 1H,  $J = 5.08$  Hz,  $\text{CH}=\text{CH}_2$ ), 5.01 (d, 1H,  $J = 11.00$  Hz,  $\text{OCH}_2\text{Ph}$ ), 4.94 (d, 1H,  $J = 3.68$  Hz,  $\text{C1}^{\text{Glc1-H}}$ ), 4.85–4.76 (m, 3H,  $\text{OCH}_2\text{Ph}$ ), 4.64 (dd, 2H,  $J = 12.36$ , 16.04 Hz,  $\text{OCH}_2\text{Ph}$ ), 4.46 (dd, 2H,  $J = 4.60$ , 11.00 Hz,  $\text{OCH}_2\text{Ph}$ ), 4.01 (t, 1H,  $J = 9.64$  Hz,  $\text{C3}^{\text{Glc1-H}}$ ), 3.88 (d, 1H,  $J = 10.08$  Hz,  $\text{C5}^{\text{Glc1-H}}$ ), 3.74 (dd, 1H,  $J = 3.68$ , 11.00 Hz,  $\text{C6}^{\text{Glc1-H}}$ ), 3.67–3.62 (m, 2H,  $\text{C6}^{\text{Glc1-H}}$  and  $\text{C4}^{\text{Glc1-H}}$ ), 3.56 (dd, 1H,  $J = 3.68$ , 9.64 Hz,  $\text{C2}^{\text{Glc1-H}}$ ), 3.51–3.45 (m, 1H, OCH), 2.47–0.68 (m, 43H, cholesteryl);  $^{13}\text{C}\{^1\text{H}\}$  NMR ( $\text{CDCl}_3$ , 400 MHz):  $\delta$  140.9, 139.0, 138.4, 138.1, 128.6, 128.5, 128.0, 121.8, 94.7 ( $\text{C1}^{\text{Glc1}}$ ), 82.2, 80.0, 78.0, 77.5, 77.1, 76.8, 76.6, 73.5, 73.2, 70.1, 56.9, 56.2, 50.2, 42.4, 40.0, 39.6, 36.9, 35.9, 32.0, 31.9, 28.4, 28.1, 23.9, 23.0, 22.7, 19.5, 18.8, 12.0; HRMS (ESI)  $m/z$   $[\text{M}+\text{Na}]^+$  calcd for  $\text{C}_{61}\text{H}_{80}\text{O}_6\text{Na}$  931.5853, found 931.5860.

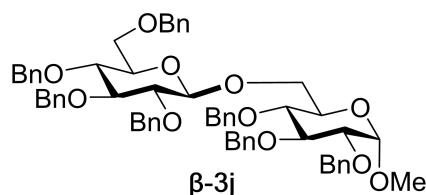

Methyl 2,3,4,6-tetra-*O*-benzyl- $\beta$ -D-glucopyranoside-(1  $\rightarrow$  6)-2,3,4-tri-*O*-benzyl- $\alpha$ -D-glucopyranoside  **$\beta$ -3j**:

Following the general procedure of **Method A** using trichloroacetimidate **1a** (50 mg, 0.073 mmol, 1.5 equiv.) and acceptor **2j** (22.6 mg, 0.049 mmol) in DCM (4.90 mL) at  $-40^{\circ}\text{C}$  temperature for 12 hours afforded  **$\alpha$ -3j** (40 mg, 83% yield) as a white solid (eluent, Toluene–Ethyl acetate 50:1).  $^1\text{H}$  NMR ( $\text{CDCl}_3$ , 400 MHz):  $\delta$  7.31–7.15 (m, 35H, ArH), 4.97 (d, 1H,  $J = 3.20$  Hz,  $\text{OCH}_2\text{Ph}$ ), 4.95 (d, 1H,  $J = 2.76$  Hz,  $\text{OCH}_2\text{Ph}$ ), 4.90 (d, 1H,  $J = 11.00$  Hz,  $\text{OCH}_2\text{Ph}$ ), 4.82–4.49 (m, 12H,  $\text{OCH}_2\text{Ph}$  and  $\text{C1}^{\text{Glc1-H}}$ ), 4.34 (d, 1H,  $J = 7.80$  Hz,  $\text{C1}^{\text{Glc2-H}}$ ), 4.22–4.16 (m, 1H,  $\text{C6}^{\text{Glc2-H}}$ ), 3.99 (t, 1H,  $J = 9.16$  Hz,  $\text{C3}^{\text{Glc1-H}}$ ), 3.84–3.81 (m, 1H,  $\text{C6}^{\text{Glc1-H}}$ ), 3.73–3.48 (m, 8H,  $\text{C4}^{\text{Glc2-H}}$ ,  $\text{C3}^{\text{Glc2-H}}$ ,  $\text{C5}^{\text{Glc2-H}}$ ,  $\text{C6}^{\text{Glc2-H}}$ ,  $\text{C6}^{\text{Glc1-H}}$ ,  $\text{C4}^{\text{Glc1-H}}$ ,  $\text{C2}^{\text{Glc1-H}}$  and  $\text{C3}^{\text{Glc1-H}}$ ), 3.44–3.41 (m, 1H,  $\text{C2}^{\text{Glc2-H}}$ ), 3.32 (s, 3H, OMe);  $^{13}\text{C}\{^1\text{H}\}$  ( $\text{CDCl}_3$ , 400 MHz):  $\delta$  138.9, 138.6, 138.5, 138.3, 138.2, 128.6, 128.4, 128.3, 128.1, 128.0, 127.9, 127.8, 127.6, 103.9 ( $\text{C1}^{\text{Glc2}}$ ), 98.1 ( $\text{C1}^{\text{Glc1}}$ ), 84.9, 82.2, 82.1, 79.8, 78.1, 78.0, 77.4, 77.1, 76.8, 75.8, 75.1, 75.0, 73.5, 73.5, 69.9, 69.1, 68.6, 55.3; HRMS (ESI)  $m/z$   $[\text{M}+\text{Na}]^+$  calcd for  $\text{C}_{62}\text{H}_{66}\text{O}_{11}\text{Na}$  1009.4503, found 1009.4510.

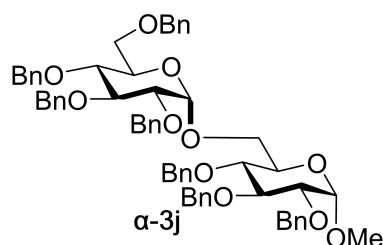

Methyl 2,3,4,6-tetra-*O*-benzyl- $\alpha$ -D-glucopyranoside-(1  $\rightarrow$  6) -2,3,4-tri-*O*-benzyl- $\alpha$ -D-glucopyranoside  **$\alpha$ -3j**:

Following the general procedure of **Method B** using trichloroacetimidate **1a** (50 mg, 0.073 mmol, 1.5 equiv.) and acceptor **2j** (22.6 mg, 0.049 mmol) in DCM (4.90 mL) at room temperature for 3 hours afforded  **$\alpha$ -3j** (43 mg, 90% yield) as a white solid (eluent, Toluene–Ethyl acetate 50:1).  $^1\text{H}$  NMR ( $\text{CDCl}_3$ , 400 MHz):  $\delta$  7.29–7.10 (m, 35H, ArH), 4.98 (d, 1H,  $J = 2.28$  Hz,  $\text{C1}^{\text{Glc1-H}}$ ), 4.95–4.90 (m, 3H,  $\text{OCH}_2\text{Ph}$ ), 4.84–4.78 (m, 3H,  $\text{OCH}_2\text{Ph}$ ), 4.75–4.56 (m, 6H,  $\text{OCH}_2\text{Ph}$ ), 4.55 (d, 1H,  $J = 4.12$  Hz,  $\text{C1}^{\text{Glc2-H}}$ ), 4.43 (t, 2H,  $J = 11.92$  Hz,  $\text{OCH}_2\text{Ph}$ ), 3.99 (d, 1H,  $J = 9.64$  Hz,  $\text{C3}^{\text{Glc2-H}}$ ), 3.94 (d, 1H,  $J = 9.64$  Hz,  $\text{C3}^{\text{Glc1-H}}$ ), 3.83–3.60 (m, 7H,  $\text{C6}^{\text{Glc1-H}}$ ,  $\text{C5}^{\text{Glc1-H}}$ ,  $\text{C5}^{\text{Glc2-H}}$ ,  $\text{C6}^{\text{Glc2-H}}$ ,  $\text{C6}^{\text{Glc1-H}}$  and  $\text{C4}^{\text{Glc2-H}}$ ), 3.56–3.52 (m, 2H,  $\text{C4}^{\text{Glc1-H}}$  and  $\text{C2}^{\text{Glc1-H}}$ ), 3.44 (dd, 1H,  $J = 3.68, 10.08$  Hz,  $\text{C2}^{\text{Glc2-H}}$ ), 3.35 (s, 3H, OMe);  $^{13}\text{C}\{^1\text{H}\}$  NMR ( $\text{CDCl}_3$ , 400 MHz):  $\delta$  138.9, 138.5, 138.3, 138.1, 128.5, 128.5, 128.4, 128.4, 128.1, 128.0, 127.8, 127.7, 98.0 ( $\text{C1}^{\text{Glc1}}$ ), 97.4 ( $\text{C1}^{\text{Glc2}}$ ), 82.2, 81.8, 80.2, 80.1, 77.9, 77.7, 77.4, 77.1, 76.8, 75.8, 75.6, 75.1, 75.0, 73.5, 72.5, 70.4, 70.3, 68.5, 66.1, 55.3; HRMS (ESI)  $m/z$   $[\text{M}+\text{Na}]^+$  calcd for  $\text{C}_{62}\text{H}_{66}\text{O}_{11}\text{Na}$  1009.4503, found 1009.4510.

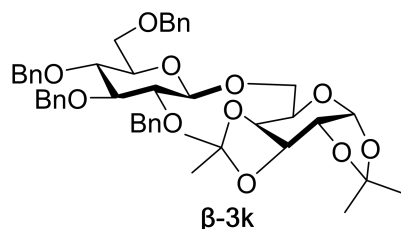

2,3,4,6-tetra-*O*-benzyl- $\beta$ -D-glucopyranoside-(1  $\rightarrow$  6)-1,2:3,4-di-*O*-isopropylidene- $\alpha$ -D-galactopyranose  **$\beta$ -3k**:

Following the general procedure of **Method A** using trichloroacetimidate **1a** (50 mg, 0.073 mmol, 1.5 equiv.) and acceptor **2k** (12.7 mg, 0.049 mmol) in DCM (4.90 mL) at  $-40^{\circ}\text{C}$  for 12 hours afforded

**$\beta$ -3k** (30 mg, 79% yield) as a white solid (eluent: Toluene–acetone 15:1).  $^1\text{H}$  NMR ( $\text{CDCl}_3$ , 400 MHz):  $\delta$  7.35–7.05 (m, 20H, ArH), 5.49 (d, 1H,  $J = 5.00$  Hz,  $\text{C1}^{\text{Gal}2}\text{-H}$ ), 4.98 (d, 1H,  $J = 11.16$  Hz,  $\text{OCH}_2\text{Ph}$ ), 4.87 (d, 1H,  $J = 10.96$  Hz,  $\text{OCH}_2\text{Ph}$ ), 4.71 (dd, 2H,  $J = 10.08, 14.00$  Hz,  $\text{OCH}_2\text{Ph}$ ), 4.64 (d, 1H,  $J = 11.12$  Hz,  $\text{OCH}_2\text{Ph}$ ), 4.52–4.42 (m, 4H,  $\text{C3}^{\text{Gal}2}\text{-H}$  and  $\text{OCH}_2\text{Ph}$ ), 4.38 (d, 1H,  $J = 7.76$  Hz,  $\text{C1}^{\text{Glc}1}\text{-H}$ ), 4.24 (dd, 1H,  $J = 2.36, 4.96$  Hz,  $\text{C2}^{\text{Gal}2}\text{-H}$ ), 4.17 (dd, 1H,  $J = 1.64, 7.92$  Hz,  $\text{C4}^{\text{Gal}2}\text{-H}$ ), 4.09–4.04 (m, 2H,  $\text{C5}^{\text{Gal}2}\text{-H}$  and  $\text{C6}^{\text{Gal}2}\text{-H}$ ), 3.68–3.51 (m, 5H,  $\text{C6}^{\text{Glc}1}\text{-H}$ ,  $\text{C6}^{\text{Glc}1}\text{-H}$ ,  $\text{C6}^{\text{Gal}2}\text{-H}$ ,  $\text{C5}^{\text{Glc}1}\text{-H}$  and  $\text{C3}^{\text{Glc}1}\text{-H}$ ), 3.41–3.37 (m, 2H,  $\text{C4}^{\text{Glc}1}\text{-H}$  and  $\text{C2}^{\text{Glc}1}\text{-H}$ ), 1.43 (s, 3H, Me), 1.38 (s, 3H, Me), 1.24 (s, 3H, Me), 1.19 (s, 3H, Me);  $^{13}\text{C}\{^1\text{H}\}$  NMR ( $\text{CDCl}_3$ , 400 MHz):  $\delta$  138.7, 138.2, 128.6, 128.3, 128.2, 127.9, 127.8, 127.7, 127.6, 127.5, 127.4, 109.4, 104.4 ( $\text{C1}^{\text{Glc}1}$ ), 96.4 ( $\text{C1}^{\text{Gal}2}$ ), 84.6, 81.7, 77.8, 77.3, 77.0, 76.7, 75.7, 75.0, 74.8, 74.4, 73.5, 71.5, 70.8, 70.5, 69.7, 68.8, 67.4, 29.7, 26.1, 26.0, 25.0, 24.5; HRMS (ESI)  $m/z$   $[\text{M}+\text{Na}]^+$  calcd for  $\text{C}_{46}\text{H}_{54}\text{O}_{11}\text{Na}$  805.3564, found 805.3567.

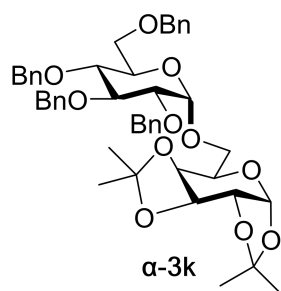

2,3,4,6-tetra-*O*-benzyl- $\alpha$ -D-glucopyranoside-(1  $\rightarrow$  6)-1,2:3,4-di-*O*-isopropylidene- $\alpha$ -D-galactopyranose  
 **$\alpha$ -3k:**

Following the general procedure of **Method B** using trichloroacetimidate **1a** (50 mg, 0.073 mmol, 1.5 equiv.) and acceptor **3k** (12.7 mg, 0.049 mmol) in DCM (4.90 mL) at room temperature for 3 hours afforded  **$\alpha$ -3k** (26 mg, 68% yield) as a white solid, (eluent: Toluene–acetone 15:1).  $^1\text{H}$  NMR ( $\text{CDCl}_3$ , 400 MHz):  $\delta$  7.38–7.12 (m, 20H, ArH), 5.52 (d, 1H,  $J = 5.20$  Hz,  $\text{C1}^{\text{Gal}1}\text{-H}$ ), 5.00 (d, 1H,  $J = 3.44$  Hz,  $\text{C1}^{\text{Glc}2}\text{-H}$ ), 4.98 (d, 1H,  $J = 10.76$  Hz,  $\text{OCH}_2\text{Ph}$ ), 4.82 (d, 1H,  $J = 11.00$  Hz,  $\text{OCH}_2\text{Ph}$ ), 4.80 (d, 1H,  $J = 11.44$  Hz,  $\text{OCH}_2\text{Ph}$ ), 4.72 (q, 2H,  $J = 11.92$  Hz,  $\text{OCH}_2\text{Ph}$ ), 4.63 (d, 1H,  $J = 12.40$  Hz,  $\text{OCH}_2\text{Ph}$ ), 4.60 (dd, 1H,  $J = 2.32, 10.08$  Hz,  $\text{C3}^{\text{Gal}1}\text{-H}$ ), 4.48 (d, 1H,  $J = 10.96$  Hz,  $\text{OCH}_2\text{Ph}$ ), 4.46 (d, 1H,  $J = 12.36$  Hz,  $\text{OCH}_2\text{Ph}$ ), 4.36 (dd, 1H,  $J = 1.84, 7.80$  Hz,  $\text{C4}^{\text{Gal}1}\text{-H}$ ), 4.32 (dd, 1H,  $J = 2.28, 5.04$  Hz,  $\text{C2}^{\text{Gal}1}\text{-H}$ ), 4.06–4.02 (m, 1H,  $\text{C5}^{\text{Gal}1}\text{-H}$ ), 3.99 (t, 1H,  $J = 9.64$  Hz,  $\text{C3}^{\text{Glc}2}\text{-H}$ ), 3.84–3.79 (m, 1H,  $\text{C3}^{\text{Glc}2}\text{-H}$ ), 3.78–3.74 (m, 3H,  $\text{C6}^{\text{Glc}2}\text{-H}$ ,  $\text{C6}^{\text{Gal}1}\text{-H}$  and  $\text{C6}^{\text{Gal}1}\text{-H}$ ), 3.72–3.63 (m, 2H,  $\text{C6}^{\text{Glc}2}\text{-H}$  and  $\text{C4}^{\text{Glc}2}\text{-H}$ ), 3.58 (dd, 1H,  $J = 3.68, 9.60$  Hz,  $\text{C2}^{\text{Glc}2}\text{-H}$ ), 1.53 (s, 3H, Me), 1.45 (s, 3H, Me), 1.33 (s, 3H, Me), 1.32 (s, 3H, Me);  $^{13}\text{C}\{^1\text{H}\}$  NMR ( $\text{CDCl}_3$ , 400 MHz):  $\delta$  139.0, 138.4, 138.1, 128.5, 128.0, 128.0, 127.9, 127.8, 127.7, 127.6, 109.3, 108.7, 97.1 ( $\text{C1}^{\text{Glc}2}$ ), 96.4 ( $\text{C1}^{\text{Gal}1}$ ), 82.1, 79.9, 77.7, 77.4, 75.7, 75.1, 73.6, 72.5, 70.9, 70.8, 70.7, 70.3, 68.4, 66.3, 65.8, 26.3, 26.2, 25.0, 25.0; HRMS (ESI)  $m/z$   $[\text{M}+\text{Na}]^+$  calcd for  $\text{C}_{46}\text{H}_{54}\text{O}_{11}\text{Na}$  805.3564, found 805.3567.

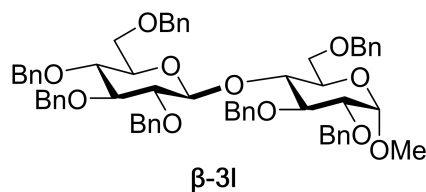

Methyl 2,3,4,6-tetra-*O*-benzyl- $\beta$ -D-glucopyranoside-(1  $\rightarrow$  4)-2,3,6-tri-*O*-benzyl- $\alpha$ -D-glucopyranoside  
 **$\beta$ -3l:**

Following the general procedure of **Method A** using trichloroacetimidate **1a** (65 mg, 0.095 mmol, 1.5 equiv.) and acceptor **3l** (29.4 mg, 0.063 mmol) in DCM (6.30 mL) at  $-40\text{ }^{\circ}\text{C}$  for 12 hours afforded  $\beta$ -**3l** (38 mg, 71% yield) as a white solid (eluent, Toluene–Ethyl acetate 15:1).  $[\alpha]_{\text{D}}^{21} = +79.6$  ( $c = 1.0$ ,  $\text{CHCl}_3$ );  $^1\text{H NMR}$  ( $\text{CDCl}_3$ , 400 MHz):  $\delta$  7.26–7.09 (m, 35H, ArH), 4.89 (dd, 2H,  $J = 3.88, 11.04$  Hz,  $\text{OCH}_2\text{Ph}$ ), 4.83 (d, 1H,  $J = 10.96$  Hz,  $\text{OCH}_2\text{Ph}$ ), 4.74–4.63 (m, 6H,  $\text{OCH}_2\text{Ph}$ ), 4.57 (d, 1H,  $J = 12.12$  Hz,  $\text{OCH}_2\text{Ph}$ ), 4.53 (d, 1H,  $J = 3.12$  Hz,  $\text{C1}^{\text{Glc}2}\text{-H}$ ), 4.50–4.42 (m, 4H,  $\text{OCH}_2\text{Ph}$ ), 4.27 (d, 1H,  $J = 7.76$  Hz,  $\text{C1}^{\text{Glc}1}\text{-H}$ ), 4.11–4.09 (m, 1H,  $\text{C6}^{\text{Glc}2}\text{-H}$ ), 3.92 (t, 1H,  $J = 9.28$  Hz,  $\text{C3}^{\text{Glc}2}\text{-H}$ ), 3.77–3.74 (m, 1H,  $\text{C3}^{\text{Glc}1}\text{-H}$ ), 3.86–3.81 (m, 5H,  $\text{C6}^{\text{Glc}1}\text{-H}$ ,  $\text{C6}^{\text{Glc}2}\text{-H}$ ,  $\text{C5}^{\text{Glc}2}\text{-H}$ ,  $\text{C4}^{\text{Glc}1}\text{-H}$  and  $\text{C6}^{\text{Glc}1}\text{-H}$ ), 3.46–3.39 (m, 3H,  $\text{C2}^{\text{Glc}2}\text{-H}$ ,  $\text{C4}^{\text{Glc}2}\text{-H}$  and  $\text{C2}^{\text{Glc}1}\text{-H}$ ), 3.37–3.34 (m, 1H,  $\text{C5}^{\text{Glc}1}\text{-H}$ ), 3.25 (s, 3H, OMe);  $^{13}\text{C}\{^1\text{H}\}$  NMR ( $\text{CDCl}_3$ , 400 MHz):  $\delta$  138.9, 138.6, 138.4, 138.3, 138.2, 128.4, 128.4, 128.3, 128.1, 128.0, 127.9, 127.8, 127.7, 127.6, 127.5, 103.8 ( $\text{C1}^{\text{Glc}1}$ ), 98.1 ( $\text{C1}^{\text{Glc}1}$ ), 84.8, 82.1, 79.8, 78.0, 77.9, 77.3, 77.0, 76.7, 75.7, 75.1, 75.0, 74.9, 73.5, 73.4, 69.9, 55.2, 29.7; HRMS (ESI)  $m/z$   $[\text{M}+\text{Na}]^+$  calcd for  $\text{C}_{62}\text{H}_{66}\text{O}_{11}\text{Na}$  1009.4503, found 1009.4509.

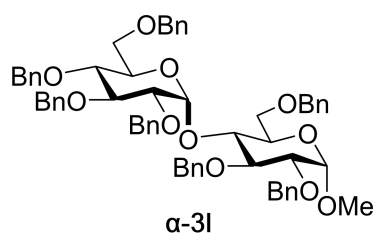

Methyl 2,3,4,6-tetra-*O*-benzyl- $\alpha$ -D-glucopyranoside-(1  $\rightarrow$  4)-2,3,6-tri-*O*-benzyl- $\alpha$ -D-glucopyranoside  **$\alpha$ -3l**:

Following the general procedure of **Method B** using trichloroacetimidate **1a** (65 mg, 0.095 mmol, 1.5 equiv.) and acceptor **3l** (29.4 mg, 0.063 mmol) in DCM (6.30 mL) at room temperature for 3 hours afforded  $\alpha$ -**3l** (37 mg, 63% yield) as a white solid (eluent, Toluene–Ethyl acetate 15:1).  $^1\text{H NMR}$  ( $\text{CDCl}_3$ , 400 MHz):  $\delta$  7.32–7.08 (m, 35H, ArH), 5.69 (d, 1H,  $J = 3.68$  Hz,  $\text{C1}^{\text{Glc}2}\text{-H}$ ), 5.03 (d, 1H,  $J = 11.32$  Hz,  $\text{OCH}_2\text{Ph}$ ), 4.88 (d, 1H,  $J = 11.00$  Hz,  $\text{OCH}_2\text{Ph}$ ), 4.82–4.76 (m, 3H,  $\text{OCH}_2\text{Ph}$ ), 4.70 (d, 1H,  $J = 12.36$  Hz,  $\text{OCH}_2\text{Ph}$ ), 4.60 (d, 1H,  $J = 3.68$  Hz,  $\text{C1}^{\text{Glc}1}\text{-H}$ ), 4.58–4.49 (m, 6H,  $\text{OCH}_2\text{Ph}$ ), 4.42 (d, 1H,  $J = 11.44$  Hz,  $\text{OCH}_2\text{Ph}$ ), 4.27 (d, 1H,  $J = 12.84$  Hz,  $\text{OCH}_2\text{Ph}$ ), 4.11–4.02 (m, 2H,  $\text{C3}^{\text{Glc}1}\text{-H}$  and  $\text{C4}^{\text{Glc}1}\text{-H}$ ), 3.90 (t, 1H,  $J = 8.72$  Hz,  $\text{C3}^{\text{Glc}2}\text{-H}$ ), 3.86–3.81 (m, 2H,  $\text{C5}^{\text{Glc}1}\text{-H}$  and  $\text{C6}^{\text{Glc}1}\text{-H}$ ), 3.72–3.62 (m, 3H,  $\text{C6}^{\text{Glc}1}\text{-H}$ ,  $\text{C4}^{\text{Glc}2}\text{-H}$  and  $\text{C5}^{\text{Glc}2}\text{-H}$ ), 3.59 (dd, 1H,  $J = 3.64, 9.16$  Hz,  $\text{C2}^{\text{Glc}1}\text{-H}$ ), 3.51–3.47 (m, 2H,  $\text{C2}^{\text{Glc}2}\text{-H}$  and  $\text{C6}^{\text{Glc}2}\text{-H}$ ), 3.39 (dd, 1H,  $J = 1.84, 11.00$  Hz,  $\text{C6}^{\text{Glc}1}\text{-H}$ ), 3.37 (s, 3H, OMe);  $^{13}\text{C}\{^1\text{H}\}$  NMR ( $\text{CDCl}_3$ , 400 MHz):  $\delta$  139.1, 138.9, 138.6, 138.3, 138.1, 138.0, 128.5, 128.4, 128.3, 128.2, 128.1, 128.0, 127.9, 127.8, 127.7, 127.6, 127.5, 127.4, 127.3, 127.2, 126.9, 97.9 ( $\text{C1}^{\text{Glc}1}$ ), 96.7 ( $\text{C1}^{\text{Glc}1}$ ), 82.1, 80.3, 79.6, 77.7, 77.4, 75.6, 75.0, 74.5, 73.6, 73.5, 73.3, 73.2, 72.4, 71.1, 69.6, 69.1, 68.3, 55.2; HRMS (ESI)  $m/z$   $[\text{M}+\text{Na}]^+$  calcd for  $\text{C}_{62}\text{H}_{66}\text{O}_{11}\text{Na}$  1009.4503, found 1009.4509.

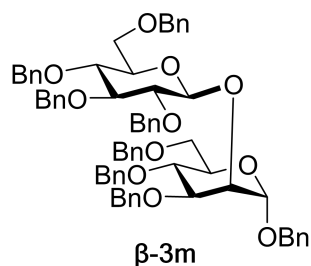

Benzyl 2,3,4,6-tetra-*O*-benzyl- $\beta$ -D-glucopyranoside-(1  $\rightarrow$  2)-3,4,6-tri-*O*-benzyl- $\beta$ -D-mannopyranoside  **$\beta$ -3m**:

Following the general procedure of **Method A** using trichloroacetimidate **1a** (65 mg, 0.095 mmol, 1.5 equiv.) and acceptor **2m** (34 mg, 0.063 mmol) in DCM (6.30 mL) at  $-40\text{ }^{\circ}\text{C}$  for 12 hours afforded  **$\beta$ -3m** (17 mg, 55% yield) as a white solid (eluent, Toluene–Ethyl acetate 15:1).  $[\alpha]_{\text{D}}^{21} = +31.0$  ( $c = 0.4$ ,  $\text{CHCl}_3$ );  $^1\text{H NMR}$  ( $\text{CDCl}_3$ , 400 MHz):  $\delta$  7.36–7.06 (m, 40H, ArH), 5.09 (d, 1H,  $J = 10.16$  Hz,  $\text{OCH}_2\text{Ph}$ ), 5.01 (s, 1H,  $\text{C1}^{\text{Glc}1}\text{-H}$ ), 4.88–4.83 (m, 3H,  $\text{OCH}_2\text{Ph}$ ), 4.74–4.65 (m, 3H,  $\text{OCH}_2\text{Ph}$ ), 4.45–4.41 (m, 5H,  $\text{OCH}_2\text{Ph}$ ), 4.36 (d, 1H,  $J = 2.04$  Hz,  $\text{C1}^{\text{Man}2}\text{-H}$ ), 4.38–4.36 (m, 2H,  $\text{OCH}_2\text{Ph}$ ), 4.33 (d, 2H,  $J = 3.00$  Hz,  $\text{OCH}_2\text{Ph}$ ), 4.23–4.22 (m, 1H,  $\text{C2}^{\text{Glc}1}\text{-H}$ ), 3.98 (t, 1H,  $J = 9.28$  Hz,  $\text{C4}^{\text{Glc}1}\text{-H}$ ), 3.92 (dd, 1H,  $J = 3.20, 9.36$  Hz,  $\text{C3}^{\text{Glc}1}\text{-H}$ ), 3.77–3.74 (m, 1H,  $\text{C5}^{\text{Glc}1}\text{-H}$ ), 3.67 (dd, 1H,  $J = 4.60, 10.52$  Hz,  $\text{C6}^{\text{Glc}1}\text{-H}$ ), 3.66–3.40 (m, 7H,  $\text{C6}^{\text{Glc}1}\text{-H}$ ,  $\text{C6}^{\text{Man}2}\text{-H}$ ,  $\text{C6}^{\text{Man}2}\text{-H}$ ,  $\text{C4}^{\text{Man}2}\text{-H}$ ,  $\text{C5}^{\text{Man}2}\text{-H}$ ,  $\text{C2}^{\text{Man}2}\text{-H}$  and  $\text{C3}^{\text{Man}2}\text{-H}$ );  $^{13}\text{C}\{^1\text{H}\}$  NMR ( $\text{CDCl}_3$ , 400 MHz):  $\delta$  129.2, 128.5, 128.4, 128.3, 128.2, 128.1, 128.0, 127.9, 127.7, 127.5, 127.3, 103.0 ( $\text{C1}^{\text{Glc}1}$ ), 97.6 ( $\text{C1}^{\text{Man}2}$ ), 84.7, 81.5, 77.3, 77.0, 76.7, 75.0, 73.3, 29.5; HRMS (ESI)  $m/z$   $[\text{M}+\text{Na}]^+$  calcd for  $\text{C}_{68}\text{H}_{70}\text{O}_{11}\text{Na}$  1085.4816, found 1085.4822.

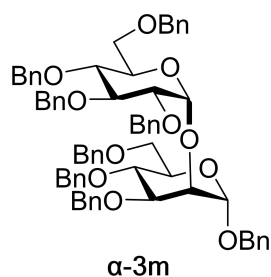

Benzyl 2,3,4,6-tetra-*O*-benzyl- $\alpha$ -D-glucopyranoside-(1  $\rightarrow$  2)-3,4,6-tri-*O*-benzyl- $\beta$ -D-mannopyranoside  **$\alpha$ -3m**:

Following the general procedure of **Method B** using trichloroacetimidate **1a** (65 mg, 0.095 mmol, 1.5 equiv.) and acceptor **2m** (34 mg, 0.063 mmol) in DCM (6.30 mL) at room temperature for 3 hours afforded  **$\alpha$ -3m** (17 mg, 51% yield) as a white solid (eluent, Toluene–Ethyl acetate 15:1).  $^1\text{H NMR}$  ( $\text{CDCl}_3$ , 400 MHz):  $\delta$  7.37–7.09 (m, 40H, ArH), 5.44 (d, 1H,  $J = 3.64$  Hz,  $\text{C1}^{\text{Glc}2}\text{-H}$ ), 4.92 (d, 1H,  $J = 1.84$  Hz,  $\text{C1}^{\text{Man}1}\text{-H}$ ), 4.88 (d, 1H,  $J = 11.00$  Hz,  $\text{OCH}_2\text{Ph}$ ), 4.82–4.51 (m, 10H,  $\text{OCH}_2\text{Ph}$ ), 4.45–4.40 (m, 4H,  $\text{OCH}_2\text{Ph}$ ), 4.35 (d, 1H,  $J = 11.44$  Hz,  $\text{OCH}_2\text{Ph}$ ), 4.21 (t, 1H,  $J = 2.28$  Hz,  $\text{C2}^{\text{Man}1}\text{-H}$ ), 4.07 (t, 1H,  $J = 9.64$  Hz,  $\text{C4}^{\text{Man}1}\text{-H}$ ), 4.01–3.96 (m, 2H,  $\text{C3}^{\text{Man}1}\text{-H}$  and  $\text{C3}^{\text{Glc}2}\text{-H}$ ), 3.83–3.77 (m, 3H,  $\text{C5}^{\text{Man}1}\text{-H}$ ,  $\text{C6}^{\text{Man}1}\text{-H}$  and  $\text{C6}^{\text{Glc}2}\text{-H}$ ), 3.73–3.69 (m, 1H,  $\text{C6}^{\text{Man}1}\text{-H}$ ), 3.63 (dd, 1H,  $J = 4.12, 11.00$  Hz,  $\text{C6}^{\text{Glc}2}\text{-H}$ ), 3.59 (t, 1H,  $J = 9.64$  Hz,  $\text{C4}^{\text{Glc}2}\text{-H}$ ), 3.53 (dd, 1H,  $J = 3.64, 10.08$  Hz,  $\text{C2}^{\text{Glc}2}\text{-H}$ ), 3.48 (dd, 1H,  $J = 1.64, 9.16$  Hz,  $\text{C5}^{\text{Glc}2}\text{-H}$ );  $^{13}\text{C}\{^1\text{H}\}$  NMR ( $\text{CDCl}_3$ , 400 MHz):  $\delta$  139.1, 138.7, 138.6, 138.5, 138.2, 138.0, 137.4, 128.5, 128.4, 128.3, 128.2, 128.1, 128.0, 127.8, 127.6, 127.5, 127.4, 127.3, 98.3 ( $\text{C1}^{\text{Glc}2}$ ), 97.3 ( $\text{C1}^{\text{Man}1}$ ), 81.6, 80.6, 79.8, 77.3, 77.1, 75.6, 75.2, 75.1, 73.6, 73.5, 73.2, 73.1, 72.8, 71.8, 70.7, 69.5, 69.0, 68.5; HRMS (ESI)  $m/z$   $[\text{M}+\text{Na}]^+$  calcd for  $\text{C}_{68}\text{H}_{70}\text{O}_{11}\text{Na}$  1085.4816, found 1085.4822.

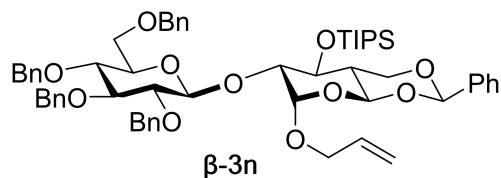

Benzyl 2,3,4,6-tetra-*O*-benzyl- $\beta$ -D-glucopyranoside (1 $\rightarrow$ 2)-4,6-*O*-benzylidene-3-*O*-TIBS- $\alpha$ -D-glucopyranoside  **$\beta$ -3n**:

Following the general procedure of **Method A** using trichloroacetimidate **1a** (50 mg, 0.073 mmol, 1.5 equiv.) and acceptor **2n** (23 mg, 0.049 mmol) in DCM (4.90 mL) at  $-40\text{ }^{\circ}\text{C}$  for 12 hours afforded  **$\beta$ -3n** (26 mg, 54% yield) as a white solid (eluent, *N*-hexane–Ethyl acetate 6:1).  $[\alpha]_{\text{D}}^{21} = +28.5$  ( $c = 1.0$ ,

CHCl<sub>3</sub>); <sup>1</sup>H NMR (CDCl<sub>3</sub>, 400 MHz): δ 7.48–7.18 (m, 25H, ArH), 6.01–5.91 (m, 1H, OCH<sub>2</sub>CH=CH<sub>2</sub>), 5.43 (s, 1H, ArCH), 5.40 (dd, 1H, *J* = 1.40, 17.44 Hz, OCH<sub>2</sub>CH=CH<sub>2</sub>), 5.18 (dd, 1H, *J* = 0.88, 11.44 Hz, OCH<sub>2</sub>CH=CH<sub>2</sub>), 5.05 (d, 1H, *J* = 10.48 Hz, OCH<sub>2</sub>Ph), 5.04 (d, 1H, *J* = 2.96 Hz, C1<sup>Glc1</sup>-H), 4.94 (d, 1H, *J* = 10.48 Hz, OCH<sub>2</sub>Ph), 4.82 (d, 1H, *J* = 7.56 Hz, C1<sup>Glc2</sup>-H), 4.81–4.75 (m, 3H, OCH<sub>2</sub>CH), 4.64–4.53 (m, 3H, OCH<sub>2</sub>CH), 4.36 (t, 1H, *J* = 9.16 Hz, C3<sup>Glc1</sup>-H), 4.30–4.22 (m, 2H, C5<sup>Glc2</sup>-H and OCH<sub>2</sub>CH), 4.09 (dd, 1H, *J* = 5.12, 13.40 Hz, C6<sup>Glc2</sup>-H), 3.98–3.87 (m, 2H, C2<sup>Glc1</sup>-H and OCH<sub>2</sub>CH), 3.77–3.68 (m, 3H, C6<sup>Glc2</sup>-H, C6<sup>Glc1</sup>-H and C3<sup>Glc2</sup>-H), 3.64–3.60 (m, 2H, C6<sup>Glc1</sup>-H and C4<sup>Glc2</sup>-H), 3.50–3.41 (m, 3H, C5<sup>Glc1</sup>-H, C4<sup>Glc1</sup>-H and C2<sup>Glc2</sup>-H), 1.09–0.92 (m, 21H, TIPIS); <sup>13</sup>C{<sup>1</sup>H} NMR (CDCl<sub>3</sub>, 400 MHz): δ 138.2, 134.2, 128.4, 128.2, 128.1, 128.0, 127.9, 127.8, 127.6, 127.5, 126.4, 104.2, 102.3, 98.2, 81.7, 77.9, 77.3, 77.0, 76.7, 75.4, 74.9, 48.2, 18.1, 13.2; HRMS (ESI) *m/z* [M+Na]<sup>+</sup> calcd for C<sub>59</sub>H<sub>74</sub>NaO<sub>11</sub>Si 1009.4898, found 1009.4905.

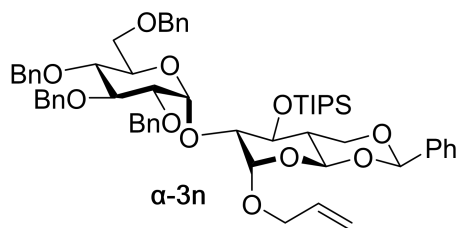

Benzyl 2,3,4,6-tetra-*O*-benzyl- $\alpha$ -D-glucopyranoside (1 $\rightarrow$ 2)-4,6-*O*-benzylidene-3-*O*-TIBS- $\alpha$ -D-glucopyranoside  **$\alpha$ -3n**:

Following the general procedure of **Method B** using trichloroacetimidate **1a** (50 mg, 0.073 mmol, 1.5 equiv.) and acceptor **2n** (23 mg, 0.049 mmol) in DCM (4.90 mL) at room temperature for 3 hours afforded  **$\alpha$ -3n** (24 mg, 51% yield) as a white solid (eluent, hexane–Ethyl acetate 6:1). <sup>1</sup>H NMR (CDCl<sub>3</sub>, 400 MHz): δ 7.47–7.16 (m, 25H, ArH), 5.93–5.84 (m, 1H, OCH<sub>2</sub>CH=CH<sub>2</sub>), 5.43 (s, 1H, ArCH), 5.31 (dd, 1H, *J* = 1.40, 17.44 Hz, OCH<sub>2</sub>CH=CH<sub>2</sub>), 5.21 (d, 1H, *J* = 3.68 Hz, C1<sup>Glc1</sup>-H), 5.17 (d, 1H, *J* = 3.68 Hz, C1<sup>Glc2</sup>-H), 5.15 (dd, 1H, *J* = 0.88, 11.44 Hz, OCH<sub>2</sub>CH=CH<sub>2</sub>), 4.89 (d, 1H, *J* = 11.00 Hz, OCH<sub>2</sub>Ph), 4.87 (d, 1H, *J* = 11.32 Hz, OCH<sub>2</sub>Ph), 4.78 (d, 1H, *J* = 11.92 Hz, OCH<sub>2</sub>Ph), 4.71 (d, 1H, *J* = 11.00 Hz, OCH<sub>2</sub>Ph), 4.61 (d, 1H, *J* = 12.36 Hz, OCH<sub>2</sub>Ph), 4.59 (d, 1H, *J* = 11.92 Hz, OCH<sub>2</sub>Ph), 4.49 (d, 1H, *J* = 11.00 Hz, OCH<sub>2</sub>Ph), 4.46 (d, 1H, *J* = 12.36 Hz, OCH<sub>2</sub>Ph), 4.38 (t, 1H, *J* = 9.16 Hz, C3<sup>Glc1</sup>-H), 4.26–4.19 (m, 2H, C6<sup>Glc1</sup>-H and OCH<sub>2</sub>CH), 4.11 (t, 1H, *J* = 9.16 Hz, C3<sup>Glc2</sup>-H), 4.02–3.96 (m, 2H, C6<sup>Glc2</sup>-H and OCH<sub>2</sub>CH), 3.90–3.84 (m, 1H, C5<sup>Glc1</sup>-H), 3.74–3.64 (m, 5H, C4<sup>Glc2</sup>-H, C6<sup>Glc1</sup>-H, C6<sup>Glc2</sup>-H, C2<sup>Glc1</sup>-H and C5<sup>Glc2</sup>-H), 3.62 (dd, 1H, *J* = 3.68, 9.60 Hz, C2<sup>Glc2</sup>-H), 3.41 (t, 1H, *J* = 9.04 Hz, C4<sup>Glc1</sup>-H), 1.15–0.95 (m, 21H, TIPIS); <sup>13</sup>C{<sup>1</sup>H} NMR (CDCl<sub>3</sub>, 400 MHz): δ 139.0, 138.9, 138.6, 138.1, 137.3, 133.5, 129.2, 128.4, 128.30, 128.2, 128.1, 127.9, 127.8, 127.7, 127.6, 127.5, 127.3, 127.2, 126.5, 118.4, 102.5, 95.2 (C1<sup>Glc1</sup>), 92.6 (C1<sup>Glc2</sup>), 82.7, 82.0, 79.4, 77.4, 75.8, 74.7, 73.6, 71.7, 71.2, 70.5, 69.2, 68.5, 68.3, 62.5, 18.3, 18.2, 13.3; HRMS (ESI) *m/z* [M+Na]<sup>+</sup> calcd for C<sub>59</sub>H<sub>74</sub>NaO<sub>11</sub>Si 1009.4898, found 1009.4905.

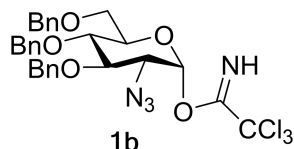

2-azido-3,4,6-tri-*O*-benzyl- $\alpha$ -D-glucopyranoside trichloroacetimidate **1b**:

To a magnetically stirred solution of 2-azido-3,4,6-tri-*O*-benzyl- $\alpha$ -D-glucopyranoside (103.4 mg, 0.22 mmol) and CCl<sub>3</sub>CN (0.22 mL, 2.2 mmol, 10.0 equiv.) in anhydrous CH<sub>2</sub>Cl<sub>2</sub> (5 mL), DBU (15.3  $\mu$ L, 0.11 mmol, 0.5 equiv.) was added dropwise at 0 °C, and the reaction mixture was

stirred at the same temperature for 3 h, after which complete consumption of starting materials was observed. The reaction mixture was concentrated and purified by flash chromatography on silica gel (preconditioned with Et<sub>3</sub>N; eluent: toluene–EtOAc, 12:1) to afford compound **1b** (133 mg, 99% yield) as a white powder. TLC (toluene–EtOAc, 12:1): *R*<sub>f</sub> = 0.60, [α]<sub>D</sub><sup>21</sup> = +61.4 (*c* = 0.53, CHCl<sub>3</sub>); <sup>1</sup>H NMR (CDCl<sub>3</sub>, 400 MHz): δ 8.70 (s, 1H, NH), 7.40–7.14 (m, 15H, ArH), 6.44 (d, 1H, *J* = 3.60 Hz, C1<sup>Glc</sup>-H), 4.94 (d, 1H, *J* = 10.80 Hz, OCH<sub>2</sub>Ph), 4.89 (d, 1H, *J* = 10.80 Hz, OCH<sub>2</sub>Ph), 4.82 (d, 1H, *J* = 10.80 Hz, OCH<sub>2</sub>Ph), 4.62 (d, 1H, *J* = 11.60 Hz, OCH<sub>2</sub>Ph), 4.57 (d, 1H, *J* = 10.80 Hz, OCH<sub>2</sub>Ph), 4.47 (d, 1H, *J* = 11.60 Hz, OCH<sub>2</sub>Ph), 4.06–3.97 (m, 2H, C3<sup>Glc</sup>-H and C5<sup>Glc</sup>-H), 3.88 (t, 1H, *J* = 9.20 Hz, C4<sup>Glc</sup>-H), 3.80 (dd, 1H, *J* = 3.20, 11.20 Hz, C6<sup>Glc</sup>-H), 3.71–3.65 (m, 2H, C6<sup>Glc</sup>-H and C2<sup>Glc</sup>-H); <sup>13</sup>C{<sup>1</sup>H} NMR (CDCl<sub>3</sub>, 400 MHz): δ 160.8, 137.7, 137.6, 128.5, 128.4, 128.0, 127.9, 127.8, 95.0 (C1<sup>Glc</sup>), 90.9, 80.1, 77.8, 77.3, 77.0, 76.7, 75.5, 75.3, 73.6, 67.8, 63.1; HRMS (ESI) *m/z* [M+Na]<sup>+</sup> calcd for C<sub>29</sub>H<sub>29</sub>Cl<sub>3</sub>N<sub>4</sub>NaO<sub>5</sub> 641.1101, found 641.1108.

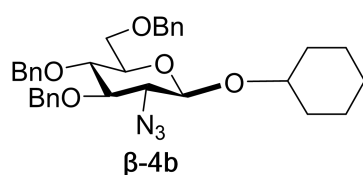

**Cyclohexanol 2-azide-3,4,6-tri-*O*-benzyl-β-D-glucopyranoside β-4b:**

Following the general procedure of Method **A** using trichloroacetimidate **1b** (50 mg, 0.081 mmol, 1.5 equiv.) and acceptor cyclohexanol **2a** (4.87 mg, 0.048 mmol) in DCM (4.80 mL) at –40°C temperature for 12 hours afforded **α/β-4b** (18.7 mg, 70% yield, α/β=9/91) as a white solid (eluent, Toluene–Ethyl acetate 30:1). [α]<sub>D</sub><sup>21</sup> = +2.12 (*c* = 1.29, CHCl<sub>3</sub>); <sup>1</sup>H NMR (CDCl<sub>3</sub>, 400 MHz): δ 7.38–7.16 (m, 15H, ArH), 4.88 (d, 1H, *J* = 11.24 Hz, OCH<sub>2</sub>Ph), 4.80 (d, 1H, *J* = 10.36 Hz, OCH<sub>2</sub>Ph), 4.78 (d, 1H, *J* = 10.28 Hz, OCH<sub>2</sub>Ph), 4.62–4.53 (m, 3H, OCH<sub>2</sub>Ph), 4.38 (d, 1H, *J* = 7.72 Hz, C1<sup>Glc1</sup>-H), 3.73–3.64 (m, 3H, C6<sup>Glc1</sup>-H, C6<sup>Glc1</sup>-H and C4<sup>Glc1</sup>-H), 3.57 (t, 1H, *J* = 8.92 Hz, C3<sup>Glc1</sup>-H), 3.44–3.36 (m, 3H, C5<sup>Glc1</sup>-H, C2<sup>Glc1</sup>-H and CHO), 1.98–1.23 (m, 10H, CH<sub>3</sub>); <sup>13</sup>C{<sup>1</sup>H} NMR (CDCl<sub>3</sub>, 400 MHz): δ 138.2, 138.1, 137.9, 128.5, 128.4, 128.0, 127.9, 127.8, 127.7, 127.6, 100.6 (C1<sup>Glc1</sup>), 83.2, 78.0, 77.8, 77.4, 77.3, 77.2, 77.1, 77.0, 76.7, 75.5, 75.1, 75.0, 73.5, 68.9, 66.5, 33.6, 31.7, 25.6, 23.9, 23.8; HRMS (ESI) *m/z* [M+Na]<sup>+</sup> calcd for C<sub>33</sub>H<sub>39</sub>N<sub>3</sub>O<sub>5</sub>Na 580.2787, found 580.2769.

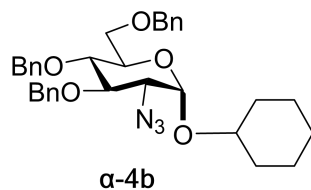

**Cyclohexanol 2-azide-3,4,6-tri-*O*-benzyl-α-D-glucopyranoside α-4b:**

Following the general procedure of Method **B** using trichloroacetimidate **1b** (50 mg, 0.081 mmol, 1.5 equiv.) and acceptor cyclohexanol **2a** (5.39 mg, 0.048 mmol) in DCM (4.80 mL) at room temperature for 3 hours afforded **α-4b** (21.7 mg, 81% yield) as a white solid (eluent, Toluene–Ethyl acetate 30:1); <sup>1</sup>H NMR (CDCl<sub>3</sub>, 400 MHz): δ 7.39–7.14 (m, 15H, ArH), 5.07 (d, 1H, *J* = 3.64 Hz, C1<sup>Glc1</sup>-H), 4.89 (d, 1H, *J* = 10.68 Hz, OCH<sub>2</sub>Ph), 4.86 (d, 1H, *J* = 10.72 Hz, OCH<sub>2</sub>Ph), 4.80 (d, 1H, *J* = 10.72 Hz, OCH<sub>2</sub>Ph), 4.63 (d, 1H, *J* = 12.04 Hz, OCH<sub>2</sub>Ph), 4.52–4.47 (m, 2H, OCH<sub>2</sub>Ph), 4.03 (dd, 1H, *J* = 8.76, 10.28 Hz, C6<sup>Glc1</sup>-H), 3.95–3.91 (m, 1H, C3<sup>Glc1</sup>-H), 3.79–3.59 (m, 4H, C4<sup>Glc1</sup>-H, C5<sup>Glc1</sup>-H, C6<sup>Glc1</sup>-H and OCH), 3.28 (dd, 1H, *J* = 3.60, 10.24 Hz,



C2<sup>Gal</sup>-H), 1.92–1.21 (m, 10H, CH<sub>2</sub>); <sup>13</sup>C{<sup>1</sup>H} NMR (CDCl<sub>3</sub>, 400 MHz): δ 138.1, 138.0, 137.9, 128.5, 128.4, 128.0, 127.9, 127.8, 127.7, 127.6, 96.3 (C1<sup>Gal</sup>), 80.1, 78.5, 77.3, 77.0, 76.7, 76.4, 75.3, 75.1, 73.5, 70.7, 68.4, 63.29, 33.3, 33.4, 29.7, 25.6, 24.1, 23.8; HRMS (ESI) m/z [M+Na]<sup>+</sup> calcd for C<sub>33</sub>H<sub>39</sub>N<sub>3</sub>O<sub>5</sub>Na 580.2787, found 580.2759.

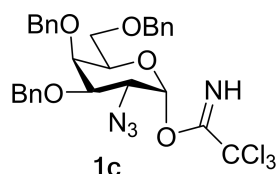

2-azide-3,4,6-tri-*O*-benzyl- $\alpha$ -D-galactose-pyranoside trichloroacetimidate **1c**:

To a magnetically stirred solution of 2-azide-3,4,6-tri-*O*-benzyl- $\alpha$ -D-galactose-pyranoside (117.7 mg, 0.25 mmol) and CCl<sub>3</sub>CN (0.25 mL, 2.5 mmol, 10.0 equiv.) in anhydrous CH<sub>2</sub>Cl<sub>2</sub> (5 mL), DBU (17.5  $\mu$ L, 0.12 mmol, 0.5 equiv.) was added dropwise at 0 °C, and the reaction mixture was stirred at the same temperature for 3 h, after which complete consumption of starting materials was observed. The reaction mixture was concentrated and purified by flash chromatography on silica gel (preconditioned with Et<sub>3</sub>N; eluent: hexane–EtOAc, 4:1) to afford compound **1c** (144.3 mg, 97% yield) as a white powder. TLC (hexane–EtOAc, 4:1): *R*<sub>f</sub> = 0.60, [ $\alpha$ ]<sub>D</sub><sup>21</sup> = +66.0 (*c* = 0.36, CHCl<sub>3</sub>); <sup>1</sup>H NMR (CDCl<sub>3</sub>, 400 MHz): δ 8.65 (s, 1H, NH), 7.43–7.23 (m, 15H, ArH), 6.38 (d, 1H, *J* = 3.60 Hz, C1<sup>Gal</sup>-H), 4.91 (d, 1H, *J* = 11.20 Hz, OCH<sub>2</sub>Ph), 4.79 (d, 1H, *J* = 11.20 Hz, OCH<sub>2</sub>Ph), 4.69 (d, 1H, *J* = 11.20 Hz, OCH<sub>2</sub>Ph), 4.57 (d, 1H, *J* = 11.20 Hz, OCH<sub>2</sub>Ph), 4.48 (d, 1H, *J* = 11.60 Hz, OCH<sub>2</sub>Ph), 4.42 (d, 1H, *J* = 11.60 Hz, OCH<sub>2</sub>Ph), 4.20–4.13 (m, 3H, C2<sup>Gal</sup>-H, C6<sup>Gal</sup>-H and C4<sup>Gal</sup>-H), 4.03 (dd, 1H, *J* = 2.40, 10.40 Hz, C3<sup>Gal</sup>-H), 3.68–3.64 (m, 1H, C5<sup>Gal</sup>-H), 3.58–3.54 (m, 1H, C6<sup>Gal</sup>-H); <sup>13</sup>C{<sup>1</sup>H} NMR (CDCl<sub>3</sub>, 400 MHz): δ 160.8, 138.1, 137.7, 137.2, 128.6, 128.4, 128.3, 128.0, 127.9, 127.8, 95.5 (C1<sup>Gal</sup>), 91.1, 77.3, 77.2, 77.0, 76.7, 75.0, 73.6, 72.8, 72.2, 72.1, 68.0, 59.2, 29.7; HRMS (ESI) m/z [M+Na]<sup>+</sup> calcd for C<sub>29</sub>H<sub>29</sub>Cl<sub>3</sub>N<sub>4</sub>NaO<sub>5</sub> 641.1101, found 641.1120.

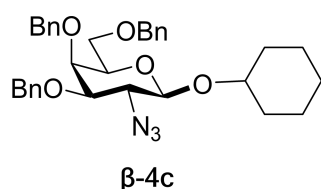

Cyclohexanol 2-azide-3,4,6-tri-*O*-benzyl- $\beta$ -D-galactose-pyranoside  **$\beta$ -4c**:

Following the general procedure of Method A using trichloroacetimidate **1c** (54.7 mg, 0.088 mmol, 1.5 equiv.) and acceptor cyclohexanol **2a** (5.89 mg, 0.059 mmol) in DCM (5.90 mL) at –40°C temperature for 12 hours afforded  $\alpha/\beta$ -**4c** (23.7 mg, 72% yield,  $\alpha/\beta$ =10:90) as a white solid (eluent, Toluene–Ethyl acetate 30:1). [ $\alpha$ ]<sub>D</sub><sup>21</sup> = –1.33 (*c* = 0.86, CHCl<sub>3</sub>); <sup>1</sup>H NMR (CDCl<sub>3</sub>, 400 MHz): δ 7.40–7.25 (m, 15H, ArH), 4.88 (d, 1H, *J* = 11.24 Hz, OCH<sub>2</sub>Ph), 4.67 (s, 2H, OCH<sub>2</sub>Ph), 4.59 (d, 1H, *J* = 12.00 Hz, OCH<sub>2</sub>Ph), 4.46–4.40 (m, 2H, OCH<sub>2</sub>Ph), 4.31 (d, 1H, *J* = 8.00 Hz, C1<sup>Gal</sup>-H), 3.85–3.78 (m, 2H, C4<sup>Gal</sup>-H and C2<sup>Gal</sup>-H), 3.69–3.55 (m, 4H, OCH, C5<sup>Gal</sup>-H, C6<sup>Gal</sup>-H and C6<sup>Gal</sup>-H), 3.26 (dd, 1H, *J* = 2.80, 10.40 Hz, C3<sup>Gal</sup>-H), 1.92–1.22 (m, 10H, CH<sub>3</sub>); <sup>13</sup>C{<sup>1</sup>H} NMR (CDCl<sub>3</sub>, 400 MHz): δ 138.4, 138.0, 137.8, 128.5, 128.4, 128.3, 128.2, 127.9, 127.8, 127.7, 127.6, 127.5, 100.7 (C1<sup>Gal</sup>), 80.7, 77.8, 77.4, 77.1, 76.7, 74.6, 73.6, 72.6, 72.2, 68.8, 63.5, 33.5, 31.6, 25.6, 24.0, 23.9; HRMS (ESI) m/z [M+Na]<sup>+</sup> calcd for C<sub>33</sub>H<sub>39</sub>N<sub>3</sub>O<sub>5</sub>Na 580.2787, found 580.2868.

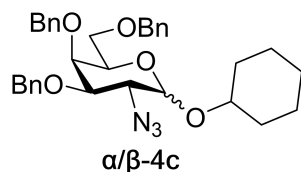

**Cyclohexanol 2-azide-3,4,6-tri-*O*-benzyl-D-galactose-pyranoside  $\alpha/\beta$ -4c:**

Following the general procedure of Method **B** using trichloroacetimidate **1c** (54.7 mg, 0.088 mmol, 1.5 equiv.) and acceptor cyclohexanol **2a** (5.89 mg, 0.059 mmol) in DCM (5.90 mL) at room temperature for 3 hours afforded  **$\alpha/\beta$ -4c** (19.7 mg, 60% yield,  $\alpha/\beta$ =50:50) as a white solid (eluent, Toluene–Ethyl acetate 30:1).  $[\alpha]_D^{21} = +56.47$  ( $c = 0.61$ ,  $\text{CHCl}_3$ );  $^1\text{H NMR}$  ( $\text{CDCl}_3$ , 400 MHz):  $\delta$  7.42–7.24 (m, 30H, ArH), 5.05 (d, 1H,  $J = 3.60$  Hz, C1<sup>Gal</sup>-H), 4.90–4.86 (m, 2H, OCH<sub>2</sub>Ph), 4.76–4.67 (m, 4H, OCH<sub>2</sub>Ph), 4.60–4.40 (m, 6H, OCH<sub>2</sub>Ph), 4.31 (d, 1H,  $J = 8.00$  Hz, C1<sup>Gal</sup>-H), 4.08–3.98 (m, 6H), 3.85–3.75 (m, 6H), 3.69–3.45 (m, 6H), 3.26 (dd, 1H,  $J = 3.60$ , 12.00 Hz), 1.91–1.25 (m, 20H, CH<sub>2</sub>);  $^{13}\text{C}\{^1\text{H}\}$  NMR ( $\text{CDCl}_3$ , 400 MHz):  $\delta$  138.4, 138.0, 137.8, 137.7, 128.5, 128.4, 128.3, 128.2, 128.1, 127.9, 127.8, 127.7, 127.6, 127.5, 100.7 (C1<sup>Gal</sup>), 96.7 (C1<sup>Gal</sup>), 80.7, 77.3, 77.2, 77.0, 76.7, 76.4, 74.8, 74.6, 73.6, 72.6, 72.2, 69.6, 68.8, 63.5, 59.7, 33.5, 33.3, 31.6, 31.5, 29.7, 25.6, 24.1, 24.0, 23.9; HRMS (ESI)  $m/z$   $[\text{M}+\text{Na}]^+$  calcd for  $\text{C}_{33}\text{H}_{39}\text{N}_3\text{O}_5\text{Na}$  580.2787, found 580.2780.

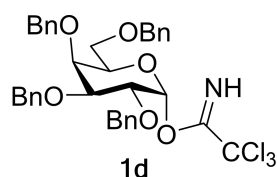

**2,3,4,6-tetra-*O*-benzyl- $\alpha$ -D-galactopyranoside trichloroacetimidate **1d**:**

To a magnetically stirred solution of 2,3,4,6-tetra-*O*-benzyl- $\alpha$ -D-galactopyranoside (49.6 mg, 0.09 mmol) and  $\text{CCl}_3\text{CN}$  (0.93 mL, 0.92 mmol, 10.0 equiv.) in anhydrous  $\text{CH}_2\text{Cl}_2$  (5.0 mL), DBU (7.1  $\mu\text{L}$ , 0.05 mmol, 0.5 equiv.) was added dropwise at 0 °C, and the reaction mixture was stirred at the same temperature for 3 h, after which complete consumption of starting materials was observed. The reaction mixture was concentrated and purified by flash chromatography on silica gel (preconditioned with  $\text{Et}_3\text{N}$ ; eluent: hexane–EtOAc, 5:1) to afford compound **1d** (61 mg, 99% yield) as a white powder. TLC (hexane–EtOAc, 5:1):  $R_f = 0.60$ . The  $^1\text{H NMR}$  is accordance with the literature previously reported<sup>8</sup>.

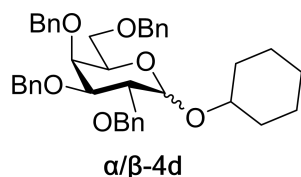

**Cyclohexanol 2,3,4,6-tetra-*O*-benzyl-D-galactose-pyranoside  $\alpha/\beta$ -4d:**

Following the general procedure of Method **A** using trichloroacetimidate **1d** (50.0 mg, 0.073 mmol, 1.5 equiv.) and acceptor cyclohexanol **2a** (4.87 mg, 0.049 mmol) in DCM (4.90 mL) at  $-40^\circ\text{C}$  temperature for 12 hours afforded  **$\alpha/\beta$ -4d** (18.6 mg, 61% yield,  $\alpha/\beta$ =14:86) as a white solid (eluent, Toluene–Ethyl acetate 15:1).  $[\alpha]_D^{21} = +32$  ( $c = 1.0$ ,  $\text{CHCl}_3$ );  $^1\text{H NMR}$  ( $\text{CDCl}_3$ , 400 MHz):  $\delta$  7.30–7.18 (m, 24H, ArH), 4.94–4.84 (m, 2H), 4.79–4.49 (m, 6H), 4.42–4.22 (m, 4H), 3.98–3.87 (m, 1H), 3.80–3.70 (m, 2H), 3.62–3.58 (m, 1H), 3.51–3.41 (m, 5H), 1.86–0.79 (m, 12H, CH<sub>2</sub>);  $^{13}\text{C}\{^1\text{H}\}$  NMR ( $\text{CDCl}_3$ , 400 MHz):  $\delta$  138.7, 128.4, 128.3, 128.2, 128.1, 127.9,

127.8, 127.5, 127.4, 102.2 (C1<sup>Gal</sup>), 82.5, 79.6, 77.3, 77.0, 76.7, 75.2, 75.3, 74.5, 73.7, 73.5, 73.4, 73.2, 69.1, 33.7, 31.9, 29.7, 25.7, 24.1, 24.0; HRMS (ESI)  $m/z$  [M+Na]<sup>+</sup> calcd for C<sub>40</sub>H<sub>46</sub>O<sub>6</sub>Na 645.3192, found 645.3222.

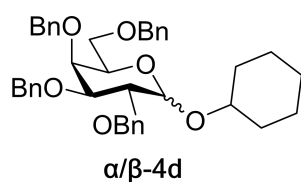

**Cyclohexanol 2,3,4,6-tetra-*O*-benzyl-D-galactose -pyranoside  $\alpha/\beta$ -4d:**

Following the general procedure of Method **B** using trichloroacetimidate **1d** (95.0 mg, 0.139 mmol, 1.5 equiv.) and acceptor cyclohexanol **2a** (9.26 mg, 0.092 mmol) in DCM (9.20 mL) at room temperature for 3 hours afforded  **$\alpha/\beta$ -4d** (48.7 mg, 85% yield,  $\alpha/\beta$ =67:33) as a white solid (eluent, Toluene–Ethyl acetate 15:1).  $[\alpha]_D^{21} = +1.7$  ( $c = 1.0$ , CHCl<sub>3</sub>); <sup>1</sup>H NMR (CDCl<sub>3</sub>, 400 MHz):  $\delta$  7.30–7.18 (m, 30H, ArH), 4.93 (d, 1H,  $J = 3.65$  Hz, C1<sup>Gal</sup>-H), 4.90–4.84 (m, 2H), 4.77 (d, 1H,  $J = 11.64$  Hz), 4.72–4.48 (m, 6H), 4.42–4.31 (m, 5H), 4.23 (t, 1H,  $J = 6.72$  Hz), 3.99–3.87 (m, 4H), 3.80–3.70 (m, 1H), 3.63–3.41 (m, 6H), 1.84–0.79 (m, 15H, CH<sub>2</sub>); <sup>13</sup>C {<sup>1</sup>H} NMR (CDCl<sub>3</sub>, 400 MHz):  $\delta$  139.0, 138.8, 138.2, 128.8, 128.5, 128.4, 128.3, 128.2, 128.1, 128.0, 127.9, 127.8, 127.6, 127.5, 127.4, 127.3, 102.2 (C1<sup>Gal</sup>), 95.5 (C1<sup>Gal</sup>), 82.5, 79.6, 79.2, 77.3, 77.0, 76.7, 76.6, 75.4, 75.3, 74.8, 73.7, 73.5, 73.4, 73.2, 73.0, 69.3, 69.2, 65.6, 33.7, 33.4, 31.6, 29.7, 25.7, 24.5, 24.3, 19.2, 13.7; HRMS (ESI)  $m/z$  [M+Na]<sup>+</sup> calcd for C<sub>40</sub>H<sub>46</sub>O<sub>6</sub>Na 645.3192, found 645.3222.

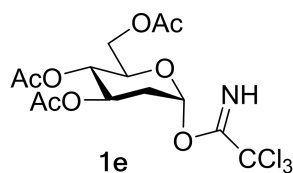

**3,4,6-tri-*O*-acetyl-2-dexoy- $\alpha$ -D-glucopyranoside trichloroacetimidate **1e**:**

To a magnetically stirred solution of 3,4,6-tri-*O*-acetyl-2-dexoy- $\alpha$ -D-glucopyranosid (39.9 mg, 0.14 mmol) and CCl<sub>3</sub>CN (0.14 mL, 1.37 mmol, 10.0 equiv.) in anhydrous CH<sub>2</sub>Cl<sub>2</sub> (5.0 mL), DBU (2.0  $\mu$ L, 0.01 mmol, 0.1 equiv.) was added dropwise at 0 °C, and the reaction mixture was stirred at the same temperature for 5 min, after 5 min the ice bath was remove and solution stirred for 1.5 h. after which complete consumption of starting materials was observed. The reaction mixture was concentrated and purified by flash chromatography on silica gel (preconditioned with Et<sub>3</sub>N; eluent: hexane–EtOAc, 2:1) to afford compound **1e** (60.2 mg, 99% yield) as a white powder. TLC (hexane–EtOAc, 2:1):  $R_f = 0.50$ . The <sup>1</sup>H NMR is accordance with the literature previously reported<sup>9</sup>.

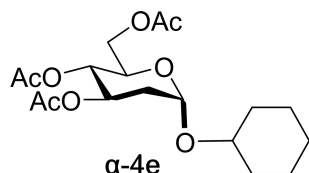

**Cyclohexanol 3,4,6-tri-*O*-acetyl-2-dexoy- $\alpha$ -D-glucopyranoside  **$\alpha$ -4e**:**

Following the general procedure of **Method A** using trichloroacetimidate **1e** (41.4 mg, 0.095 mmol, 1.5 equiv.) and acceptor cyclohexanol **2a** (6.74 mg, 0.064 mmol) in DCM (6.40 mL) at –40°C temperature for 12 hours afforded  **$\alpha/\beta$ -4e** (17.1 mg, 72% yield,  $\alpha/\beta$ =88/12) as a white solid (eluent, Hex–Ethyl acetate 3:1); <sup>1</sup>H NMR (CDCl<sub>3</sub>, 400 MHz):  $\delta$  5.40–5.34 (m, 1H, C3<sup>Glc1</sup>-H), 5.13 (d, 1H,  $J = 3.16$  Hz,

C4<sup>Glc1</sup>-H), 5.00 (t, 1H,  $J = 9.64$  Hz, C1<sup>Glc1</sup>-H), 4.30 (dd, 1H,  $J = 5.24, 12.64$  Hz, C6<sup>Glc1</sup>-H), 4.10–4.06 (m, 2H, C5<sup>Glc1</sup>-H and C6<sup>Glc1</sup>-H), 3.59–3.52 (m, 1H, OCH), 2.20 (dd, 1H,  $J = 5.04, 12.48$  Hz, C2<sup>Glc1</sup>-H), 2.11 (s, 3H, OAc), 2.06 (s, 3H, OAc), 2.03 (s, 3H, OAc), 1.89–1.23 (m, 11H, C2<sup>Glc1</sup>-H and CH<sub>3</sub>); <sup>13</sup>C{<sup>1</sup>H} NMR (CDCl<sub>3</sub>, 400 MHz):  $\delta$  170.8, 170.3, 170.0, 101.1, 94.9, 77.3, 77.0, 76.7, 75.5, 69.7, 69.3, 67.9, 62.6, 35.6, 33.4, 31.5, 25.6, 24.2, 23.9, 21.0, 20.8, HRMS (ESI)  $m/z$  [M+Na]<sup>+</sup> calcd for C<sub>18</sub>H<sub>28</sub>O<sub>8</sub>Na 395.1682, found 395.1673.

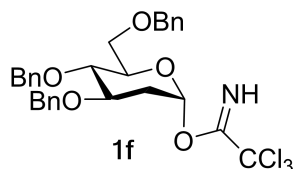

**3,4,6-tri-*O*-benzyl-2-dexoy- $\alpha$ -D-glucopyranoside trichloroacetimidate **1f**:**

To a magnetically stirred solution of 3,4,6-tri-*O*-benzyl-2-dexoy- $\alpha$ -D-glucopyranosid (50.0 mg, 0.12 mmol) and CCl<sub>3</sub>CN (0.12 mL, 1.15 mmol, 10.0 equiv.) in anhydrous CH<sub>2</sub>Cl<sub>2</sub> (3.0 mL), DBU (1.7  $\mu$ L, 0.01 mmol, 0.1 equiv.) was added dropwise at 0 °C, and the reaction mixture was stirred at the same temperature for 5 min, after 5 min the ice bath was remove and solution stirred for 1.5 h. Evaporation of solvents afforded **1f**, the product was used without purification for the glycosytion.. The <sup>1</sup>H NMR is accordance with the literature previously reported<sup>9</sup>.

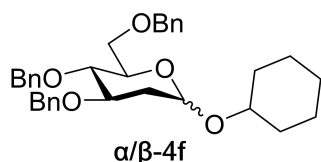

**Cyclohexanol 3,4,6-tri-*O*-benzyl-2-dexoy-D-glucopyranoside  $\alpha/\beta$ -**4f**:**

Following the general procedure of **Method A** using trichloroacetimidate **1f** (33.3 mg, 0.06 mmol, 1.5 equiv.) and acceptor cyclohexanol **2a** (3.85 mg, 0.04 mmol) in DCM (4.00 mL) at –40°C temperature for 12 hours afforded  $\alpha/\beta$ -**4f** (18.0 mg, 87% yield,  $\alpha/\beta=33/67$ ) as a white solid (eluent, Toluene–Ethyl acetate 15:1); <sup>1</sup>H NMR (CDCl<sub>3</sub>, 400 MHz):  $\delta$  7.39–7.19 (m, 22.5H), 5.14 (d, 1H,  $J = 2.96$  Hz), 4.94–4.90 (m, 1.4H), 4.73–4.51 (m, 7.7H), 4.08–4.02 (m, 1.0H), 3.90–3.78 (m, 2.6H), 3.73–3.42 (m, 5.2H), 2.37–1.24 (m, 22H); <sup>13</sup>C{<sup>1</sup>H} NMR (CDCl<sub>3</sub>, 400 MHz):  $\delta$  138.9, 138.6, 138.4, 138.3, 128.4, 128.3, 128.2, 128.1, 128.0, 127.9, 127.7, 127.6, 127.5, 127.4, 97.9, 95.1, 78.5, 77.9, 77.3, 77.0, 76.7, 75.0, 74.9, 73.4, 71.8, 70.7, 65.9, 36.0, 33.4, 31.5, 25.7, 24.3, 24.0; HRMS (ESI)  $m/z$  [M+Na]<sup>+</sup> calcd for C<sub>33</sub>H<sub>40</sub>O<sub>5</sub>Na 539.2773, found 539.2764.

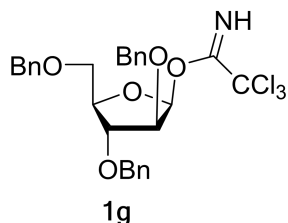

**2,3,5-tri-*O*-benzyl- $\beta$ -D-Arabinose-furanose trichloroacetimidate **1g**:**

To a magnetically stirred solution of 2,3,5-tri-*O*-benzyl- $\beta$ -D-Arabinose-furanose (131.7 mg, 0.29 mmol) and CCl<sub>3</sub>CN (0.3 mL, 2.94 mmol, 10.0 equiv.) in anhydrous CH<sub>2</sub>Cl<sub>2</sub> (10.0 mL), DBU (22  $\mu$ L, 0.15 mmol, 0.5 equiv.) was added dropwise at 0 °C, and the reaction mixture was stirred at the same temperature for 3 h, after which complete consumption of starting materials was observed. The reaction mixture was concentrated and purified by flash chromatography on

silica gel (preconditioned with Et<sub>3</sub>N; eluent: hexane–EtOAc, 3:1) to afford compound **1g** (159 mg, 97% yield) as a white powder. TLC (hexane–EtOAc, 3:1): *R*<sub>f</sub> = 0.50, [α]<sub>D</sub><sup>21</sup> = +22.9 (*c* = 0.65, CHCl<sub>3</sub>); <sup>1</sup>H NMR (CDCl<sub>3</sub>, 400 MHz): δ 8.52 (s, 1H, NH), 7.39–7.24 (m, 15H, ArH), 6.36 (s, 1H, C1<sup>Ara</sup>-H), 4.70 (d, 1H, *J* = 11.60 Hz, OCH<sub>2</sub>Ph), 4.57–4.54 (m, 3H, OCH<sub>2</sub>Ph), 4.50 (d, 2H, *J* = 2.40 Hz, OCH<sub>2</sub>Ph), 4.48–4.43 (m, 1H, C4<sup>Ara</sup>-H), 4.26 (d, 1H, *J* = 2.40 Hz, C2<sup>Ara</sup>-H), 4.06 (dd, 1H, *J* = 2.40, 6.00 Hz, C3<sup>Ara</sup>-H), 3.70–3.65 (m, 2H, C5<sup>Ara</sup>-H and C5<sup>Ara</sup>-H); <sup>13</sup>C{<sup>1</sup>H} NMR (CDCl<sub>3</sub>, 400 MHz): δ 161.1, 138.0, 137.7, 137.3, 128.5, 128.4, 128.3, 128.0, 127.9, 127.8, 127.6, 127.5, 104.4, 86.6, 83.7, 83.5, 77.4, 77.0, 76.7, 73.5, 72.1, 72.0, 69.4, 29.7; HRMS (ESI) *m/z* [M+Na]<sup>+</sup> calcd for C<sub>28</sub>H<sub>28</sub>Cl<sub>3</sub>NNaO<sub>5</sub> 586.0931, found 586.0935.

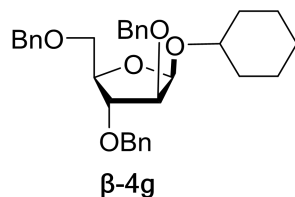

Cyclohexanol 2,3,5-tri-*O*-benzyl-β-D-Arabinose-furanose **β-4g**:

Following the general procedure of **Method A** using trichloroacetimidate **1g** (83.1 mg, 0.15 mmol, 1.5 equiv.) and acceptor cyclohexanol **2a** (10.01 mg, 0.10 mmol) in DCM (10.00 mL) at –40°C temperature for 12 hours afforded **α/β-4g** (25.1 mg, 50% yield, α/β=25/75) as a white solid (eluent, Toluene–Ethyl acetate 15:1). [α]<sub>D</sub><sup>21</sup> = +49.68 (*c* = 0.92, CHCl<sub>3</sub>); <sup>1</sup>H NMR (CDCl<sub>3</sub>, 400 MHz): δ 7.35–7.24 (m, 15H, ArH), 5.10 (d, 1H, *J* = 4.40 Hz, C1<sup>Ara</sup>-H), 4.70–4.50 (m, 6H, OCH<sub>2</sub>Ph), 4.11–4.03 (m, 3H, OCH, C3<sup>Ara</sup>-H and C2<sup>Ara</sup>-H), 3.59–3.52 (m, 3H, C4<sup>Ara</sup>-H, C5<sup>Ara</sup>-H and C5<sup>Ara</sup>-H), 1.90–1.14 (m, 10H, CH<sub>3</sub>); <sup>13</sup>C{<sup>1</sup>H} NMR (CDCl<sub>3</sub>, 400 MHz): δ 138.3, 138.1, 137.8, 128.4, 128.3, 128.0, 127.8, 127.7, 127.6, 127.5, 98.7 (C1<sup>Ara</sup>), 84.0, 83.7, 79.9, 77.3, 77.0, 76.7, 75.9, 73.3, 73.0, 72.3, 72.2, 33.7, 31.8, 25.6, 24.5, 24.3; HRMS (ESI) *m/z* [M+Na]<sup>+</sup> calcd for C<sub>32</sub>H<sub>38</sub>O<sub>5</sub>Na 525.2617, found 525.2608.

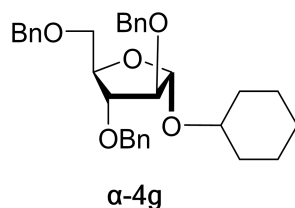

Cyclohexanol 2,3,5-tri-*O*-benzyl-α-D-Arabinose-furanose **α-4g**:

Following the general procedure of **Method B** using trichloroacetimidate **1g** (83.1 mg, 0.15 mmol, 1.5 equiv.) and acceptor cyclohexanol **2a** (10.01 mg, 0.10 mmol) in DCM (10.00 mL) at room temperature for 3 hours afforded **α/β-4g** (31.1 mg, 62% yield, α/β=86/14) as a white solid (eluent, Toluene–Ethyl acetate 15:1). [α]<sub>D</sub><sup>21</sup> = –20.4 (*c* = 2.02, CHCl<sub>3</sub>); <sup>1</sup>H NMR (CDCl<sub>3</sub>, 400 MHz): δ 7.34–7.23 (m, 15H, ArH), 5.21 (d, 1H, *J* = 1.60 Hz, C1<sup>Ara</sup>-H), 4.60–4.46 (m, 6H, OCH<sub>2</sub>Ph), 4.22–4.19 (m, 1H, C4<sup>Ara</sup>-H), 4.03–4.01 (dd, 1H, *J* = 1.60, 3.60 Hz, C2<sup>Ara</sup>-H), 3.94–3.91 (q, 1H, *J* = 3.60 Hz, C3<sup>Ara</sup>-H), 3.67–3.57 (m, 3H, C5<sup>Ara</sup>-H, C5<sup>Ara</sup>-H and OCH), 1.91–1.24 (m, 10H, CH<sub>3</sub>); <sup>13</sup>C{<sup>1</sup>H} NMR (CDCl<sub>3</sub>, 400 MHz): δ 138.2, 138.0, 137.7, 128.4, 128.3, 128.0, 127.8, 127.7, 127.6, 127.5, 104.1 (C1<sup>Ara</sup>), 88.8, 83.6, 80.0, 77.3, 77.0, 76.7, 74.9, 73.3, 72.0, 71.9, 70.0, 33.7, 31.7, 25.7, 24.2, 24.1; HRMS (ESI) *m/z* [M+Na]<sup>+</sup> calcd for C<sub>32</sub>H<sub>38</sub>O<sub>5</sub>Na 525.2617, found 525.2733.

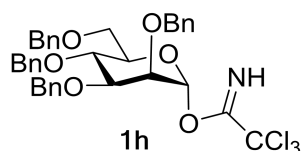

2,3,4,6-tetra-*O*-benzyl- $\alpha$ -D-mannose-pyranoside trichloroacetimidate **1h**:

To a magnetically stirred solution of 2,3,4,6-tetra-*O*-benzyl- $\alpha$ -D-mannose-pyranoside (73.7 mg, 0.14 mmol) and  $\text{CCl}_3\text{CN}$  (0.14 mL, 1.36 mmol, 10.0 equiv.) in anhydrous  $\text{CH}_2\text{Cl}_2$  (5.0 mL), DBU (9.6  $\mu\text{L}$ , 0.068 mmol, 0.5 equiv.) was added dropwise at 0 °C, and the reaction mixture was stirred at the same temperature for 3 h, after which complete consumption of starting materials was observed. The reaction mixture was concentrated and purified by flash chromatography on silica gel (preconditioned with  $\text{Et}_3\text{N}$ ; eluent: hexane–EtOAc, 4:1) to afford compound **1h** (91.3 mg, 98% yield) as a white powder. TLC (hexane–EtOAc, 4:1):  $R_f = 0.50$ ,  $[\alpha]_D^{21} = +26.0$  ( $c = 0.19$ ,  $\text{CHCl}_3$ );  $^1\text{H}$  NMR ( $\text{CDCl}_3$ , 400 MHz):  $\delta$  8.52 (s, 1H, NH), 7.43–7.19 (m, 20H, ArH), 6.36 (d, 1H,  $J = 2.00$  Hz,  $\text{C1}^{\text{Man-H}}$ ), 4.89 (d, 1H,  $J = 10.40$  Hz,  $\text{OCH}_2\text{Ph}$ ), 4.77 (s, 2H,  $\text{OCH}_2\text{Ph}$ ), 4.69–4.51 (m, 5H,  $\text{OCH}_2\text{Ph}$ ), 4.15 (t, 1H,  $J = 9.60$  Hz,  $\text{C4}^{\text{Man-H}}$ ), 3.98–3.91 (m, 2H,  $\text{C6}^{\text{Man-H}}$  and  $\text{C3}^{\text{Man-H}}$ ), 3.88–3.87 (m, 1H,  $\text{C2}^{\text{Man-H}}$ ), 3.82 (dd, 1H,  $J = 4.40, 11.20$  Hz,  $\text{C5}^{\text{Man-H}}$ ), 3.74–3.71 (m, 1H,  $\text{C6}^{\text{Man-H}}$ );  $^{13}\text{C}\{^1\text{H}\}$  NMR ( $\text{CDCl}_3$ , 400 MHz):  $\delta$  161.0, 138.3, 138.1, 128.4, 128.3, 128.2, 128.0, 127.9, 127.8, 127.7, 96.1, 78.9, 77.3, 77.0, 76.7, 75.4, 74.8, 74.2, 73.5, 73.4, 72.7, 72.4, 68.8, 29.7; HRMS (ESI)  $m/z$   $[\text{M}+\text{Na}]^+$  calcd for  $\text{C}_{36}\text{H}_{36}\text{Cl}_3\text{NNaO}_6$  706.1506, found 706.1510.

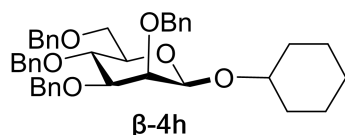

Cyclohexanol 2,3,4,6-tetra-*O*-benzyl- $\beta$ -D-mannose-pyranoside  **$\beta$ -4h**:

Following the general procedure of Method **A** using trichloroacetimidate **1h** (40.4 mg, 0.059 mmol, 1.5 equiv.) and acceptor cyclohexanol **2a** (3.90 mg, 0.039 mmol) in DCM (3.90 mL) at  $-40^\circ\text{C}$  temperature for 12 hours afforded  $\alpha/\beta$ -**4h** (21.1 mg, 87% yield,  $\alpha/\beta=25:75$ ) as a white solid (eluent, Toluene–Acetonitrile 15:1);  $^1\text{H}$  NMR ( $\text{CDCl}_3$ , 400 MHz):  $\delta$  7.36–7.25 (m, 20H, ArH), 4.99 (d, 1H,  $J = 1.60$  Hz,  $\text{C1}^{\text{Glc1-H}}$ ), 4.87 (d, 1H,  $J = 10.80$  Hz,  $\text{OCH}_2\text{Ph}$ ), 4.78–4.61 (m, 5H,  $\text{OCH}_2\text{Ph}$ ), 4.55–4.49 (m, 2H,  $\text{OCH}_2\text{Ph}$ ), 4.00–3.91 (m, 2H,  $\text{C3}^{\text{Glc1-H}}$  and  $\text{C4}^{\text{Glc1-H}}$ ), 3.86–3.70 (m, 4H,  $\text{C2}^{\text{Glc1-H}}$ ,  $\text{C5}^{\text{Glc1-H}}$ ,  $\text{C6}^{\text{Glc1-H}}$  and  $\text{C6}^{\text{Glc1-H}}$ ), 3.61–3.54 (m, 1H, OCH), 1.67–1.16 (m, 10H,  $\text{CH}_2$ );  $^{13}\text{C}\{^1\text{H}\}$  NMR ( $\text{CDCl}_3$ , 400 MHz):  $\delta$  138.7, 138.5, 138.4, 128.3, 128.2, 128.1, 127.8, 127.7, 127.6, 127.5, 127.4, 127.3, 95.7 ( $\text{C1}^{\text{Glc1}}$ ), 80.3, 77.4, 77.0, 76.7, 75.4, 75.1, 74.8, 73.3, 72.6, 72.2, 71.8, 69.4, 33.2, 31.3, 25.7, 24.0, 23.8; HRMS (ESI)  $m/z$   $[\text{M}+\text{Na}]^+$  calcd for  $\text{C}_{40}\text{H}_{46}\text{O}_6\text{Na}$  645.3192, found 645.3202.

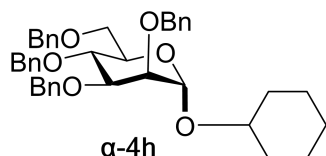

Cyclohexanol 2,3,4,6-tetra-*O*-benzyl- $\alpha$ -D-mannose-pyranoside  **$\alpha$ -4h**:

Following the general procedure of Method **B** using trichloroacetimidate **1h** (46.2 mg, 0.067 mmol, 1.5 equiv.) and acceptor cyclohexanol **2a** (4.50 mg, 0.045 mmol) in DCM (4.50 mL) at room temperature for 3 hours afforded  $\alpha/\beta$ -**4h** (24.1 mg, 86% yield,  $\alpha/\beta=25:75$ ) as a white solid

(eluent, Toluene–Acetonitrile 15:1);  $^1\text{H}$  NMR ( $\text{CDCl}_3$ , 400 MHz):  $\delta$  7.49–7.19 (m, 20H, ArH), 5.02 (d, 1H,  $J = 12.40$  Hz,  $\text{OCH}_2\text{Ph}$ ), 4.92–4.89 (m, 2H,  $\text{OCH}_2\text{Ph}$ ), 4.64–4.42 (m, 6H,  $\text{C}1^{\text{Glc}1}\text{-H}$  and  $\text{OCH}_2\text{Ph}$ ), 3.86–3.81 (m, 3H,  $\text{C}2^{\text{Glc}1}\text{-H}$ ,  $\text{C}4^{\text{Glc}1}\text{-H}$  and  $\text{C}6^{\text{Glc}1}\text{-H}$ ), 3.74–3.69 (m, 2H,  $\text{C}6^{\text{Glc}1}\text{-H}$  and  $\text{OCH}$ ), 3.50 (dd, 1H,  $J = 3.20, 9.20$  Hz,  $\text{C}3^{\text{Glc}1}\text{-H}$ ), 3.47–3.42 (m, 1H,  $\text{C}5^{\text{Glc}1}\text{-H}$ ), 1.79–1.26 (m, 10H,  $\text{CH}_2$ );  $^{13}\text{C}\{^1\text{H}\}$  NMR ( $\text{CDCl}_3$ , 400 MHz):  $\delta$  138.9, 138.6, 138.4, 138.3, 128.5, 128.3, 128.1, 127.8, 127.6, 127.5, 127.4, 127.3, 99.5 ( $\text{C}1^{\text{Glc}1}$ ), 82.6, 77.3, 77.0, 76.7, 75.9, 75.1, 75.0, 74.1, 73.7, 73.4, 71.4, 69.9, 33.5, 31.6, 25.8, 23.9, 23.7; HRMS (ESI)  $m/z$   $[\text{M}+\text{Na}]^+$  calcd for  $\text{C}_{40}\text{H}_{46}\text{O}_6\text{Na}$  645.3192, found 645.3199.

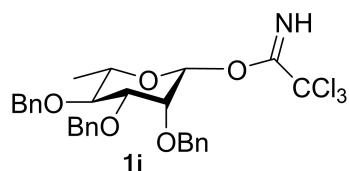

2,3,4,6-tetra-*O*-benzyl- $\beta$ -D-rhamnose-pyranoside trichloroacetimidate **1i**:

To a magnetically stirred solution of 2,3,4,6-tetra-*O*-benzyl- $\beta$ -D-rhamnose-pyranoside (60 mg, 0.14 mmol) and  $\text{CCl}_3\text{CN}$  (0.1 mL, 1.11 mmol, 8.0 equiv.) in anhydrous  $\text{CH}_2\text{Cl}_2$  (3.0 mL), DBU (8.0  $\mu\text{L}$ , 0.06 mmol, 0.4 equiv.) was added dropwise at 0  $^\circ\text{C}$ , and the reaction mixture was stirred at the same temperature for 3 h, after which complete consumption of starting materials was observed. The reaction mixture was concentrated and purified by flash chromatography on silica gel (preconditioned with  $\text{Et}_3\text{N}$ ; eluent: hexane– $\text{EtOAc}$ , 4:1) to afford compound **1i** (91.3 mg, 98% yield) as a white powder. TLC (hexane– $\text{EtOAc}$ , 4:1):  $R_f = 0.50$ ,  $[\alpha]_D^{21} = -29.5$  ( $c = 0.36$ ,  $\text{CHCl}_3$ );  $^1\text{H}$  NMR ( $\text{CDCl}_3$ , 400 MHz):  $\delta$  8.51 (s, 1H, NH), 7.42–7.25 (m, 15H, ArH), 6.24 (d, 1H,  $J = 2.00$  Hz,  $\text{C}1^{\text{Rha}}\text{-H}$ ), 4.96 (d, 1H,  $J = 10.80$  Hz,  $\text{OCH}_2\text{Ph}$ ), 4.78 (s, 2H,  $\text{OCH}_2\text{Ph}$ ), 4.67–4.57 (m, 3H,  $\text{OCH}_2\text{Ph}$ ), 3.92–3.85 (m, 3H,  $\text{C}5^{\text{Rha}}\text{-H}$ ,  $\text{C}2^{\text{Rha}}\text{-H}$  and  $\text{C}3^{\text{Rha}}\text{-H}$ ), 3.71 (t, 1H,  $J = 9.20$  Hz,  $\text{C}4^{\text{Rha}}\text{-H}$ ), 1.35 (d, 1H,  $J = 6.40$  Hz,  $\text{CH}_3$ );  $^{13}\text{C}\{^1\text{H}\}$  NMR ( $\text{CDCl}_3$ , 400 MHz):  $\delta$  160.6, 138.3, 138.1, 137.9, 128.6, 128.5, 128.4, 128.2, 128.0, 127.8, 127.7, 96.0, 79.8, 78.9, 77.3, 77.0, 76.7, 75.6, 73.9, 72.8, 72.3, 71.1, 29.7, 18.1; HRMS (ESI)  $m/z$   $[\text{M}+\text{Na}]^+$  calcd for  $\text{C}_{29}\text{H}_{30}\text{Cl}_3\text{NNaO}_5$  600.1087, found 600.1089.

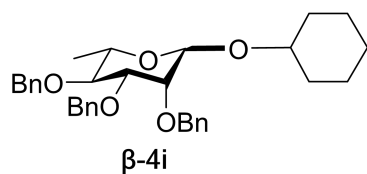

Cyclohexanol 2,3,4,6-tetra-*O*-benzyl- $\beta$ -D-rhamnose-pyranoside  **$\beta$ -4i**:

Following the general procedure of Method A using trichloroacetimidate **1i** (36.0 mg, 0.062 mmol, 1.5 equiv.) and acceptor cyclohexanol **2a** (4.15 mg, 0.041 mmol) in DCM (4.10 mL) at  $-40^\circ\text{C}$  temperature for 12 hours afforded  **$\alpha/\beta$ -4i** (19.1 mg, 90% yield,  $\alpha/\beta=52:48$ ) as a white solid (eluent, Toluene–Ethyl acetate 15:1).  $[\alpha]_D^{21} = -45.9$  ( $c = 1.3$ ,  $\text{CHCl}_3$ );  $^1\text{H}$  NMR ( $\text{CDCl}_3$ , 400 MHz):  $\delta$  7.50–7.23 (m, 15H, ArH), 5.02–4.89 (m, 3H,  $\text{OCH}_2\text{Ph}$ ), 4.65 (d, 1H,  $J = 10.80$  Hz,  $\text{OCH}_2\text{Ph}$ ), 4.51–4.40 (m, 3H,  $\text{C}1^{\text{Glc}1}\text{-H}$  and  $\text{OCH}_2\text{Ph}$ ), 3.84 (d, 1H,  $J = 2.80$  Hz,  $\text{C}2^{\text{Glc}1}\text{-H}$ ), 3.71–3.65 (m, 1H,  $\text{OCH}$ ), 3.62 (t, 1H,  $J = 9.20$  Hz,  $\text{C}4^{\text{Glc}1}\text{-H}$ ), 3.44 (dd, 1H,  $J = 2.80, 9.20$  Hz,  $\text{C}3^{\text{Glc}1}\text{-H}$ ), 3.32–3.26 (m, 1H,  $\text{C}5^{\text{Glc}1}\text{-H}$ ), 1.92–1.24 (m, 13H,  $\text{CH}_2$ );  $^{13}\text{C}\{^1\text{H}\}$  NMR ( $\text{CDCl}_3$ , 400 MHz):  $\delta$  138.9, 138.6, 138.3, 128.5, 128.3, 128.1, 128.0, 127.6, 127.5, 127.4, 127.3, 99.2 ( $\text{C}1^{\text{Glc}1}$ ), 82.4,

80.2, 77.3, 77.0, 76.7, 76.2, 75.4, 74.3, 73.7, 71.8, 71.3, 33.4, 31.5, 25.8, 23.8, 23.6, 18.1; HRMS (ESI)  $m/z$   $[M+Na]^+$  calcd for  $C_{33}H_{40}O_5Na$  539.2773, found 539.2752.

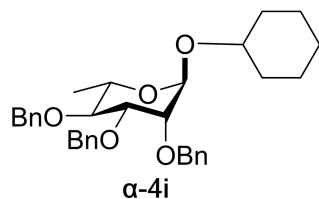

**Cyclohexanol 2,3,4,6-tetra-*O*-benzyl- $\alpha$ -D-rhamnose-pyranoside  $\alpha$ -4i:**

Following the general procedure of Method **B** using trichloroacetimidate **1i** (39.7 mg, 0.069 mmol, 1.5 equiv.) and acceptor cyclohexanol **2a** (4.58 mg, 0.046 mmol) in DCM (4.60 mL) at room temperature for 3 hours afforded  $\alpha/\beta$ -**4i** (20.7 mg, 87% yield,  $\alpha/\beta=91:9$ ) as a white solid (eluent, Toluene–Ethyl acetate 15:1);  $^1H$  NMR ( $CDCl_3$ , 400 MHz):  $\delta$  7.38–7.25 (m, 15H, ArH), 4.94 (d, 1H,  $J = 10.80$  Hz,  $OCH_2Ph$ ), 4.86 (d, 1H,  $J = 1.60$  Hz,  $C1^{Glc1-H}$ ), 4.79–4.61 (m, 5H,  $OCH_2Ph$ ), 3.88 (dd, 1H,  $J = 3.20, 9.60$  Hz), 3.79–3.70 (m, 2H,  $C5^{Glc1-H}$  and  $C2^{Glc1-H}$ ), 3.61 (t, 1H,  $J = 9.20$  Hz,  $C4^{Glc1-H}$ ), 3.55–3.48 (m, 1H, OCH), 1.76–1.15 (m, 13H,  $CH_2$ );  $^{13}C\{^1H\}$  NMR ( $CDCl_3$ , 400 MHz):  $\delta$  138.7, 138.6, 138.5, 128.4, 128.3, 128.1, 128.0, 127.9, 127.7, 127.6, 127.5, 95.7 ( $C1^{Glc1}$ ), 80.8, 80.3, 77.4, 77.0, 76.7, 75.6, 75.5, 74.5, 72.8, 72.2, 68.0, 33.3, 31.2, 25.7, 24.0, 23.8, 18.0; HRMS (ESI)  $m/z$   $[M+Na]^+$  calcd for  $C_{33}H_{40}O_5Na$  539.2773, found 539.2764.

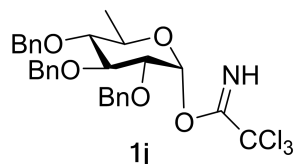

**2,3,4-tri-*O*-benzyl-6-dexoy- $\alpha$ -D-glucopyranoside trichloroacetimidate **1j**:**

To a magnetically stirred solution of 2,3,4-tri-*O*-benzyl-6-dexoy- $\alpha$ -D-glucopyranoside (60 mg, 0.14 mmol) and  $CCl_3CN$  (0.14 mL, 1.38 mmol, 10.0 equiv.) in anhydrous  $CH_2Cl_2$  (5.0 mL), DBU (10.0  $\mu$ L, 0.07 mmol, 0.5 equiv.) was added dropwise at 0 °C, and the reaction mixture was stirred at the same temperature for 3 h, after which complete consumption of starting materials was observed. The reaction mixture was concentrated and purified by flash chromatography on silica gel (preconditioned with  $Et_3N$ ; eluent: hexane–EtOAc, 3:1) to afford compound **1j** (79.4 mg, 98% yield) as a white powder. TLC (hexane–EtOAc, 3:1):  $R_f = 0.50$ ,  $[\alpha]_D^{21} = +78.3$  ( $c = 0.56$ ,  $CHCl_3$ );  $^1H$  NMR ( $CDCl_3$ , 400 MHz):  $\delta$  8.55 (s, 1H, NH), 7.31–7.25 (m, 15H, ArH), 6.40 (d, 1H,  $J = 3.56$  Hz,  $C1^{Glc-H}$ ), 4.96 (d, 1H,  $J = 10.88$  Hz,  $OCH_2Ph$ ), 4.91 (d, 1H,  $J = 10.92$  Hz,  $OCH_2Ph$ ), 4.82 (d, 1H,  $J = 10.88$  Hz,  $OCH_2Ph$ ), 4.75–4.63 (m, 3H,  $OCH_2Ph$ ), 4.04–3.93 (m, 2H,  $C3^{Glc-H}$  and  $C5^{Glc-H}$ ), 3.72 (dd, 1H,  $J = 3.36, 9.44$  Hz,  $C2^{Glc-H}$ ), 3.22 (t, 1H,  $J = 9.48$  Hz,  $C4^{Glc-H}$ ), 1.25 (d, 3H,  $J = 3.24$  Hz,  $CH_3$ );  $^{13}C\{^1H\}$  NMR ( $CDCl_3$ , 400 MHz):  $\delta$  161.5, 138.6, 138.1, 138.0, 128.5, 128.4, 128.2, 128.1, 127.9, 127.7, 127.6, 94.1 ( $C1^{Glc}$ ), 91.3, 82.9, 81.2, 79.7, 77.4, 77.0, 76.7, 75.7, 75.6, 72.9, 69.7, 29.7, 18.0; HRMS (ESI)  $m/z$   $[M+Na]^+$  calcd for  $C_{29}H_{30}Cl_3NNaO_5$  600.1087, found 600.1092.



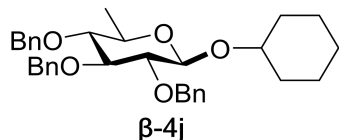

Cyclohexanol 2,3,4-tri-*O*-benzyl-6-dexoy- $\beta$ -D-glucopyranoside  **$\beta$ -4j**:

Following the general procedure of **Method A** using trichloroacetimidate **1j** (46.7 mg, 0.08 mmol, 1.5 equiv.) and acceptor cyclohexanol **2a** (5.78 mg, 0.05 mmol) in DCM (5.00 mL) at  $-40^{\circ}\text{C}$  temperature for 12 hours afforded  **$\alpha/\beta$ -4j** (23.2 mg, 90% yield,  $\alpha/\beta=33/67$ ) as a white solid (eluent, Hex–Ethyl acetate 4:1);  $^1\text{H}$  NMR ( $\text{CDCl}_3$ , 400 MHz):  $\delta$  7.39–7.28 (m, 15H, ArH), 5.02 (d, 1H,  $J = 10.88$  Hz,  $\text{OCH}_2\text{Ph}$ ), 4.94 (d, 1H,  $J = 10.92$  Hz,  $\text{OCH}_2\text{Ph}$ ), 4.88 (d, 1H,  $J = 10.84$  Hz,  $\text{OCH}_2\text{Ph}$ ), 4.80 (d, 1H,  $J = 10.92$  Hz,  $\text{OCH}_2\text{Ph}$ ), 4.73 (d, 1H,  $J = 10.88$  Hz,  $\text{OCH}_2\text{Ph}$ ), 4.64 (d, 1H,  $J = 10.84$  Hz,  $\text{OCH}_2\text{Ph}$ ), 4.51 (d, 1H,  $J = 7.84$  Hz,  $\text{C1}^{\text{Glc1-H}}$ ), 3.74–3.67 (m, 1H, OCH), 3.62 (t, 1H,  $J = 9.12$  Hz,  $\text{C4}^{\text{Glc1-H}}$ ), 3.47–3.36 (m, 2H,  $\text{C2}^{\text{Glc1-H}}$  and  $\text{C5}^{\text{Glc1-H}}$ ), 3.22 (t, 1H,  $J = 9.12$  Hz,  $\text{C3}^{\text{Glc1-H}}$ ), 2.01–1.24 (m, 13H,  $\text{CH}_3$ );  $^{13}\text{C}\{^1\text{H}\}$  NMR ( $\text{CDCl}_3$ , 400 MHz):  $\delta$  138.7, 138.6, 138.2, 128.4, 128.3, 128.1, 128.0, 127.9, 127.8, 127.6, 127.5, 101.6 ( $\text{C1}^{\text{Glc1}}$ ), 84.7, 83.4, 82.6, 77.3, 77.0, 76.7, 75.7, 75.3, 74.9, 71.0, 33.8, 31.9, 25.6, 24.1, 24.0, 18.0; HRMS (ESI)  $m/z$   $[\text{M}+\text{Na}]^+$  calcd for  $\text{C}_{33}\text{H}_{40}\text{O}_5\text{Na}$  539.2773, found 539.2762.

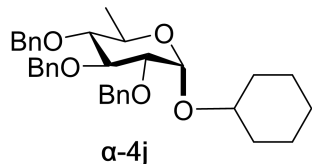

Cyclohexanol 2,3,4-tri-*O*-benzyl-6-dexoy- $\alpha$ -D-glucopyranoside  **$\alpha$ -4j**:

Following the general procedure of **Method B** using trichloroacetimidate **1j** (46.7 mg, 0.08 mmol, 1.5 equiv.) and acceptor cyclohexanol **2a** (5.78 mg, 0.05 mmol) in DCM (5.00 mL) at room temperature for 3 hours afforded  **$\alpha/\beta$ -4j** (24.8 mg, 87% yield,  $\alpha/\beta=33/67$ ) as a white solid (eluent, Hex–Ethyl acetate 4:1).  $[\alpha]_D^{21} = +64.3$  ( $c = 0.61$ ,  $\text{CHCl}_3$ ),  $^1\text{H}$  NMR ( $\text{CDCl}_3$ , 400 MHz):  $\delta$  7.40–7.28 (m, 15H, ArH), 5.02 (d, 1H,  $J = 10.76$  Hz,  $\text{OCH}_2\text{Ph}$ ), 4.92 (d, 1H,  $J = 10.80$  Hz,  $\text{OCH}_2\text{Ph}$ ), 4.88 (d, 1H,  $J = 3.68$  Hz,  $\text{C1}^{\text{Glc1-H}}$ ), 4.83 (d, 1H,  $J = 10.72$  Hz,  $\text{OCH}_2\text{Ph}$ ), 4.77 (d, 1H,  $J = 11.92$  Hz,  $\text{OCH}_2\text{Ph}$ ), 4.70–4.64 (m, 2H,  $\text{OCH}_2\text{Ph}$ ), 4.00 (t, 1H,  $J = 9.82$  Hz,  $\text{C3}^{\text{Glc1-H}}$ ), 3.91–3.84 (m, 1H,  $\text{C5}^{\text{Glc1-H}}$ ), 3.56–3.52 (m, 2H,  $\text{C2}^{\text{Glc1-H}}$  and CHO), 3.15 (t, 1H,  $J = 9.24$  Hz,  $\text{C4}^{\text{Glc1-H}}$ ), 1.93–1.20 (m, 13H,  $\text{CH}_3$ );  $^{13}\text{C}\{^1\text{H}\}$  NMR ( $\text{CDCl}_3$ , 400 MHz):  $\delta$  139.0, 138.4, 128.4, 128.3, 128.0, 94.4 ( $\text{C1}^{\text{Glc1}}$ ), 84.1, 80.4, 77.3, 77.0, 76.7, 75.6, 75.4, 75.2, 72.9, 33.4, 31.5, 25.6, 24.5, 24.2; HRMS (ESI)  $m/z$   $[\text{M}+\text{Na}]^+$  calcd for  $\text{C}_{33}\text{H}_{40}\text{O}_5\text{Na}$  539.2773, found 539.2806.

---

## 5 Reference

- 1 M. J. Frisch, G. W. Trucks, H. B. Schlegel, G. E. Scuseria, M. A. Robb, J. R. Cheeseman, G. Scalmani, V. Barone, B. Mennucci, G. A. Petersson, H. Nakatsuji, M. Caricato, X. Li, H. P. Hratchian, A. F. Izmaylov, J. Bloino, G. Zheng, J. L. Sonnenberg, M. Hada, M. Ehara, K. Toyota, R. Fukuda, J. Hasegawa, M. Ishida, T. Nakajima, Y. Honda, O. Kitao, H. Nakai, T. Vreven, J. A. Montgomery, Jr., J. E. Peralta, F. Ogliaro, M. Bearpark, J. J. Heyd, E. Brothers, K. N. Kudin, V. N. Staroverov, R. Kobayashi, J. Normand, K. Raghavachari, A. Rendell, J. C. Burant, S. S. Iyengar, J. Tomasi, M. Cossi, N. Rega, J. M. Millam, M. Klene, J. E. Knox, J. B. Cross, V. Bakken, C. Adamo, J. Jaramillo, R. Gomperts, R. E. Stratmann, O. Yazyev, A. J. Austin, R. Cammi, C. Pomelli, J. W. Ochterski, R. L. Martin, K. Morokuma, V. G. Zakrzewski, G. A. Voth, P. Salvador, J. J. Dannenberg, S. Dapprich, A. D. Daniels, O. Farkas, J. B. Foresman, J. V. Ortiz, J. Cioslowski, D. J. Fox, Gaussian 09, revision D.01; Gaussian, Inc.: Wallingford, CT, 2009.
- 2 A. V. Marenich, C. J. Cramer, D. G. Truhlar, Universal Solvation Model Based on Solute Electron Density and on a Continuum Model of the Solvent Defined by the Bulk Dielectric Constant and Atomic Surface Tensions. *J. Phys. Chem.*, 2009, **113**, 6378–6396.
- 3 (a) P. C. Hariharan, J. A. Pople, The influence of polarization functions on molecular orbital hydrogenation energies, *Theor. Chem. Acc.*, 1973, **28**, 213–222. (b) M. J. Frisch, J. A. Pople, J. S. Binkley, Self-consistent molecular orbital methods 25. Supplementary functions for Gaussian basis sets, *J. Chem. Phys.*, 1984, **80**, 3265–3269.
- 4 M. Dolg, U. Wedig, H. Stoll, H. Preuss, Energy-adjusted ab initio pseudopotentials for the first row transition elements, *J. Chem. Phys.*, 1987, **86**, 866–872.
- 5 A. V. Marenich, C. J. Cramer, D. G. Truhlar, Universal Solvation Model Based on Solute Electron Density and on a Continuum Model of the Solvent Defined by the Bulk Dielectric Constant and Atomic Surface Tensions, *J. Phys. Chem. B.*, 2009, **113**, 6378–6396.
- 6 Y. Zhao, D. G. Truhlar, The M06 suite of density functionals for main group thermochemistry, thermochemical kinetics, noncovalent interactions, excited states, and transition elements: two new functionals and systematic testing of four M06-class functionals and 12 other functionals, *Theor. Chem. Acc.*, 2008, **120**, 215–241.
- 7 P. Fuentealba, H. Preuss, H. Stoll, L. V. Szentpaly, A proper account of core-polarization with pseudopotentials: single valence-electron alkali compounds, *Chem. Phys. Lett.*, 1982, **89**, 418–422.
- 8 S. Kim, S. Song, T. Lee, S. Jung, D. Kim, Practical Synthesis of KRN7000 from Phytosphingosine, *Synthesis*, 2004, **6**, 847–850
9. C. Bucher, Prof. Dr. Ryan Gilmour, Fluorine-Directed Glycosylation, *Angew. Chem.*, 2010, **122**, 8906–8910

## 6 NMR Spectrums of Compounds

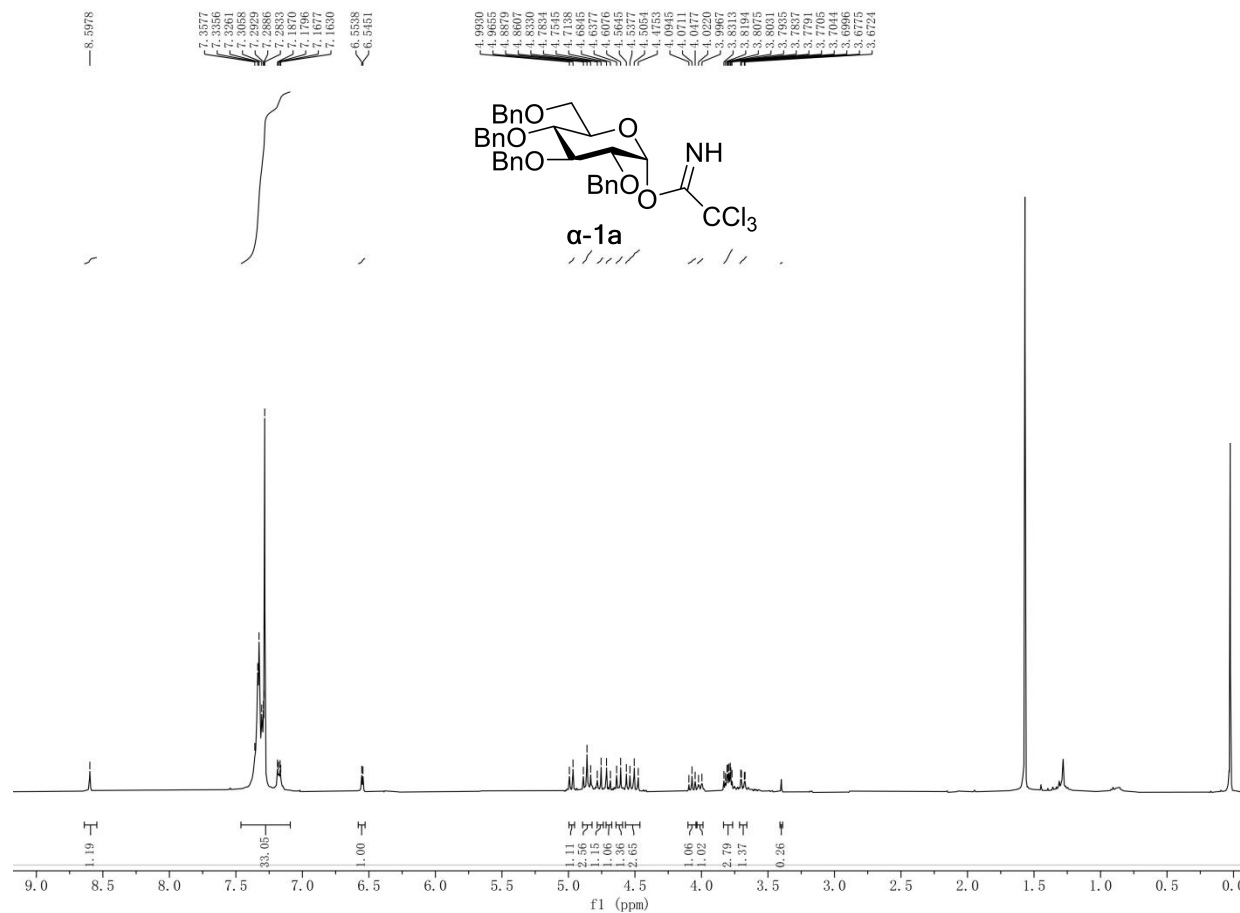

Figure S1. <sup>1</sup>H NMR (400 MHz, CDCl<sub>3</sub>) spectrum of **α-1a**

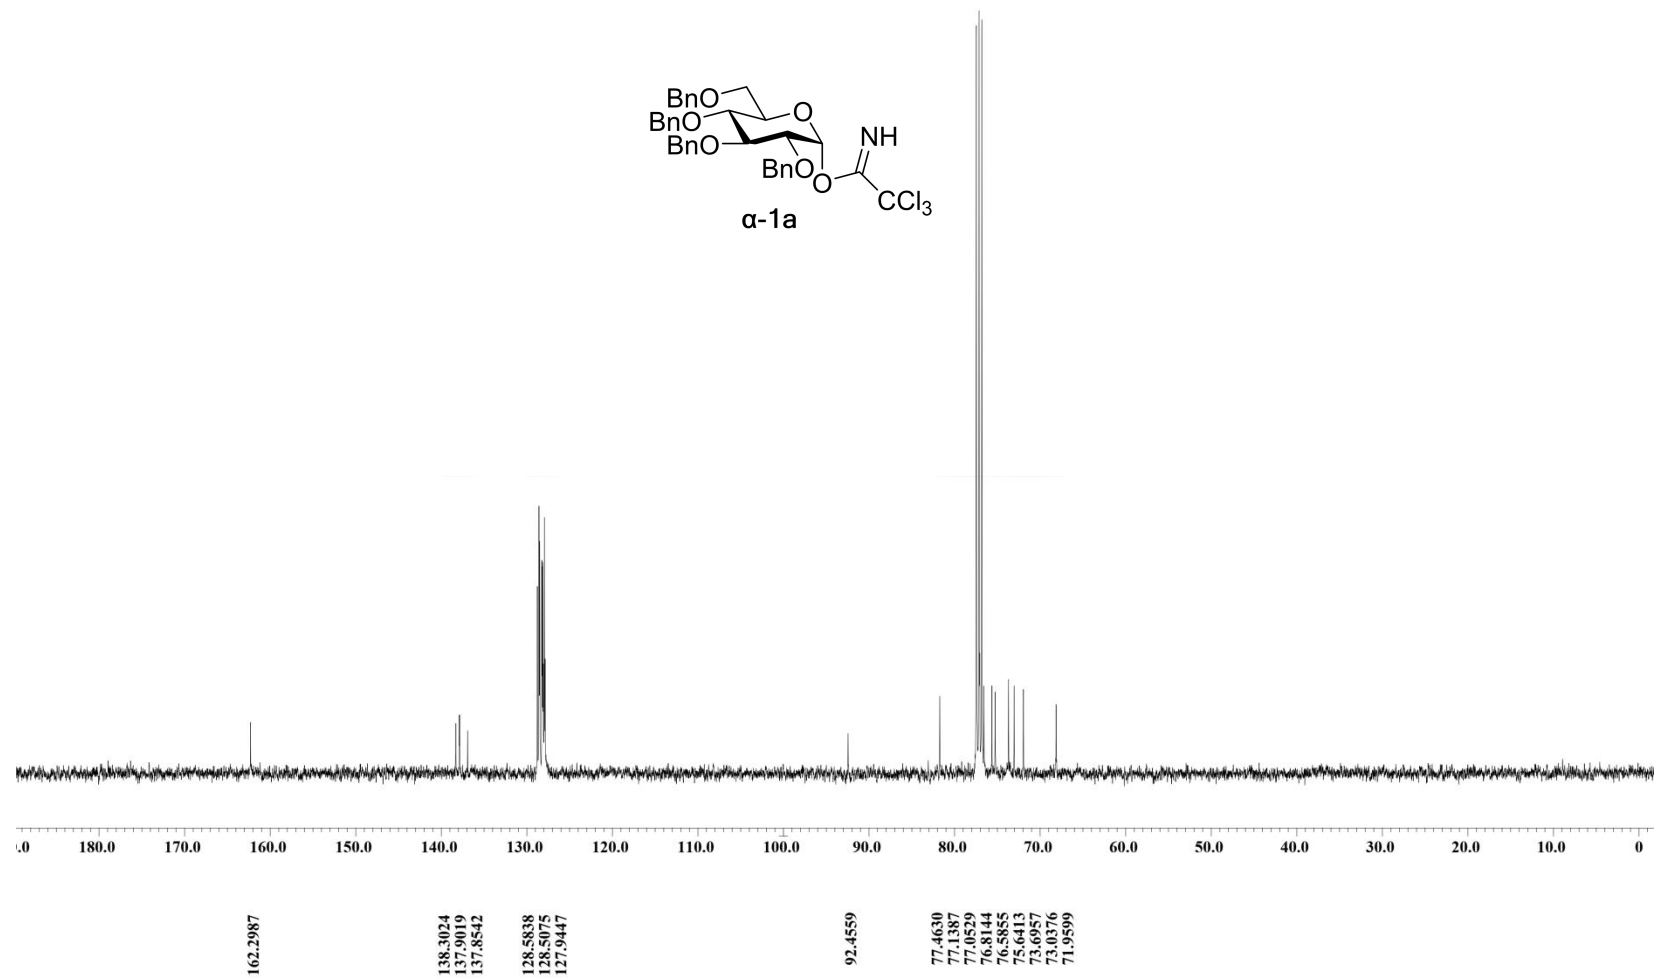

**Figure S2.** <sup>13</sup>C NMR (400 MHz, CDCl<sub>3</sub>) spectrum of **α-1a**

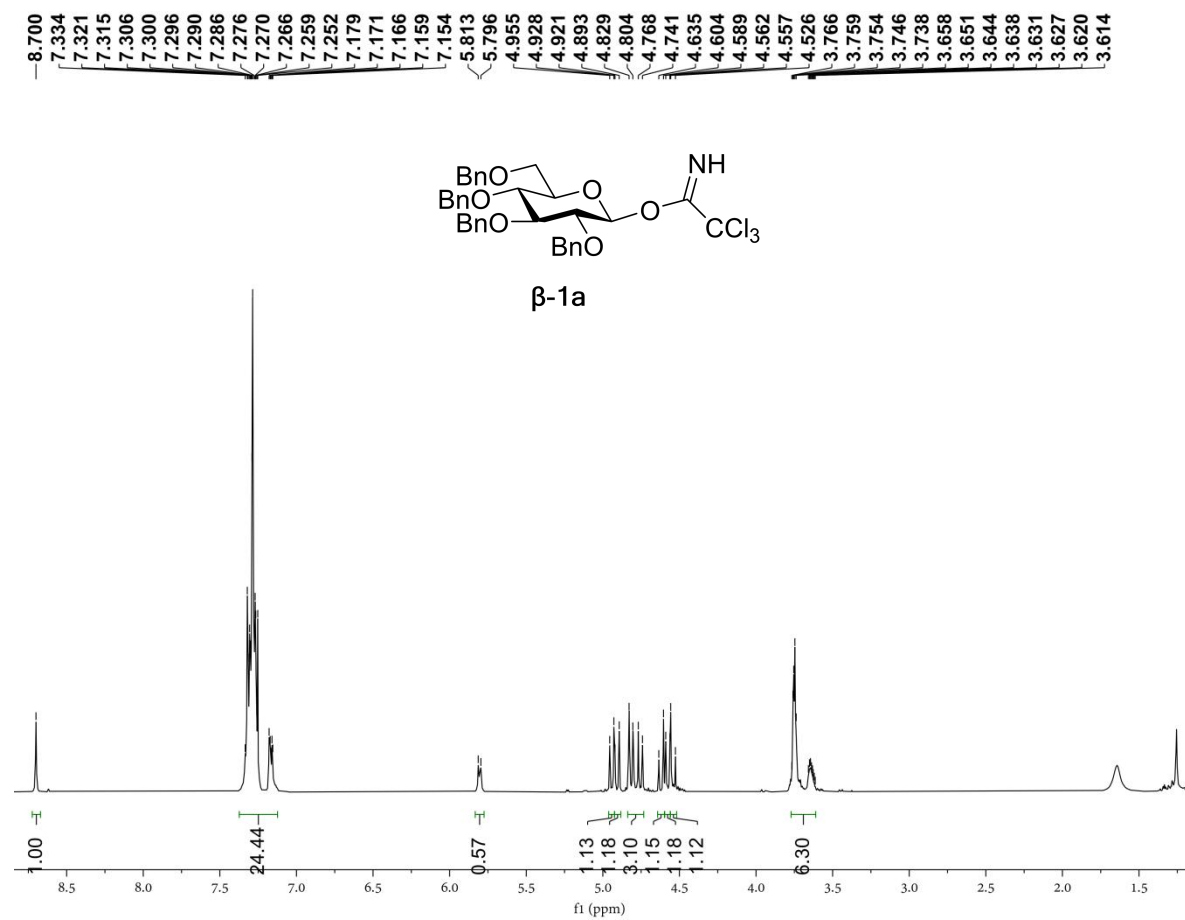

Figure S3.  $^1\text{H}$  NMR (400 MHz,  $\text{CDCl}_3$ ) spectrum of  $\beta$ -1a

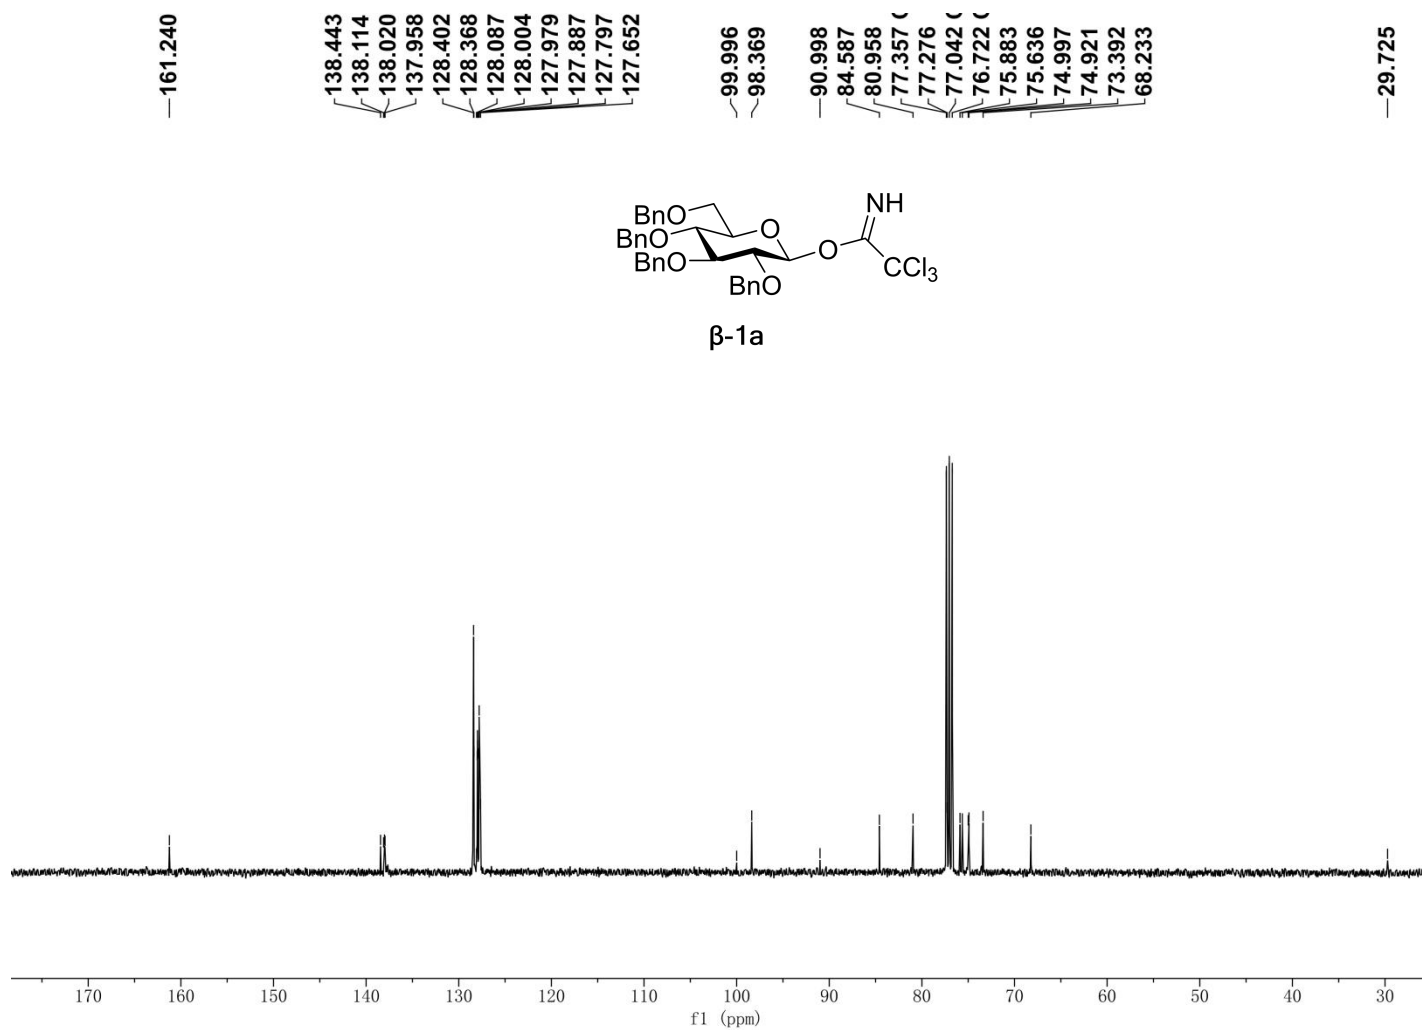

Figure S4. <sup>13</sup>C NMR (400 MHz, CDCl<sub>3</sub>) spectrum of **β-1a**

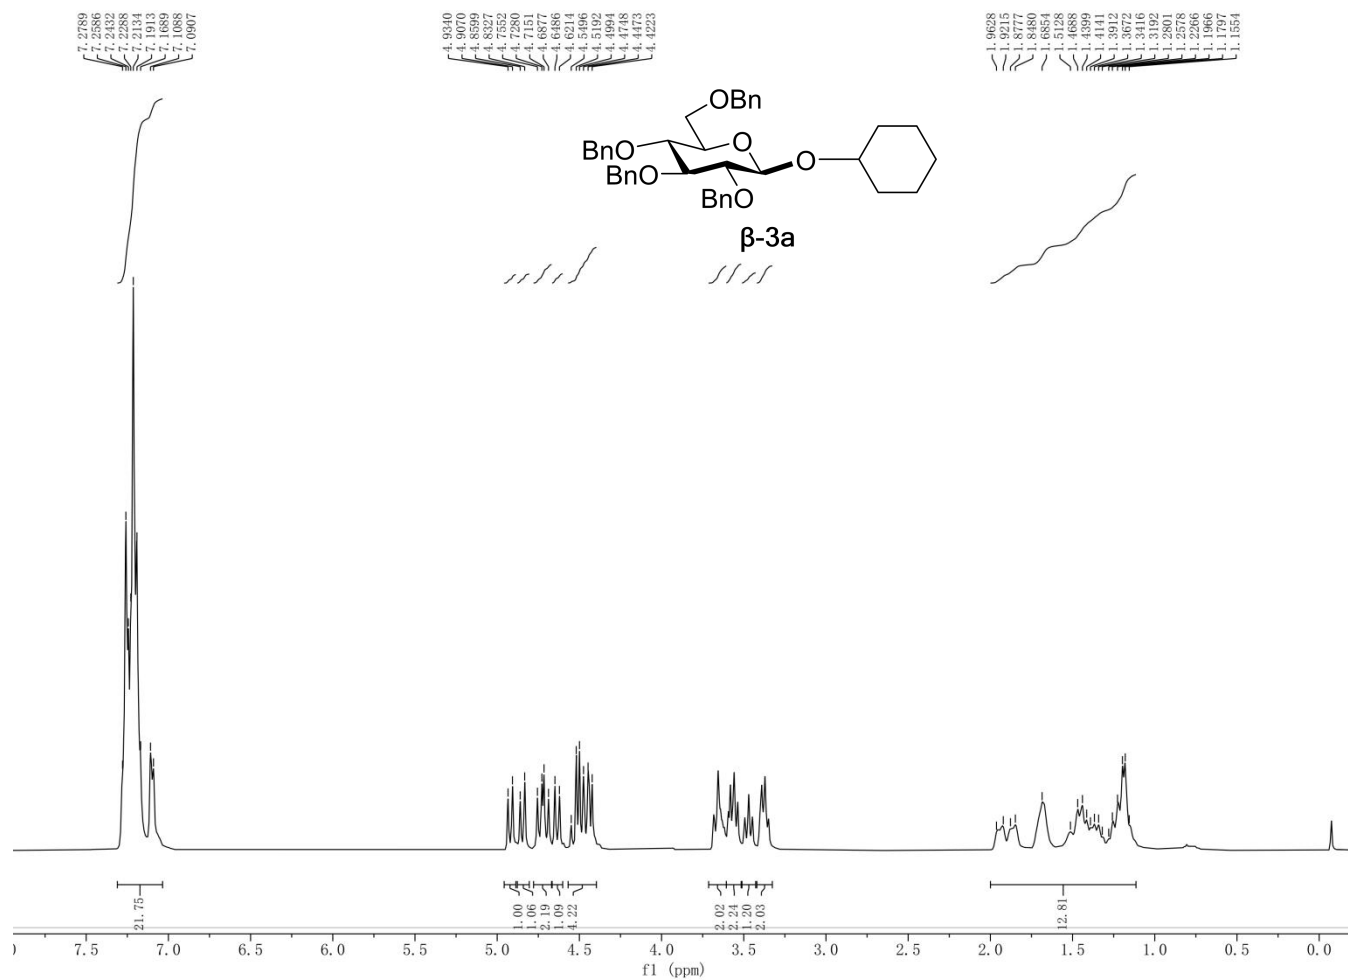

Figure S5.  $^1\text{H NMR}$  (400 MHz,  $\text{CDCl}_3$ ) spectrum of  $\beta$ -3a

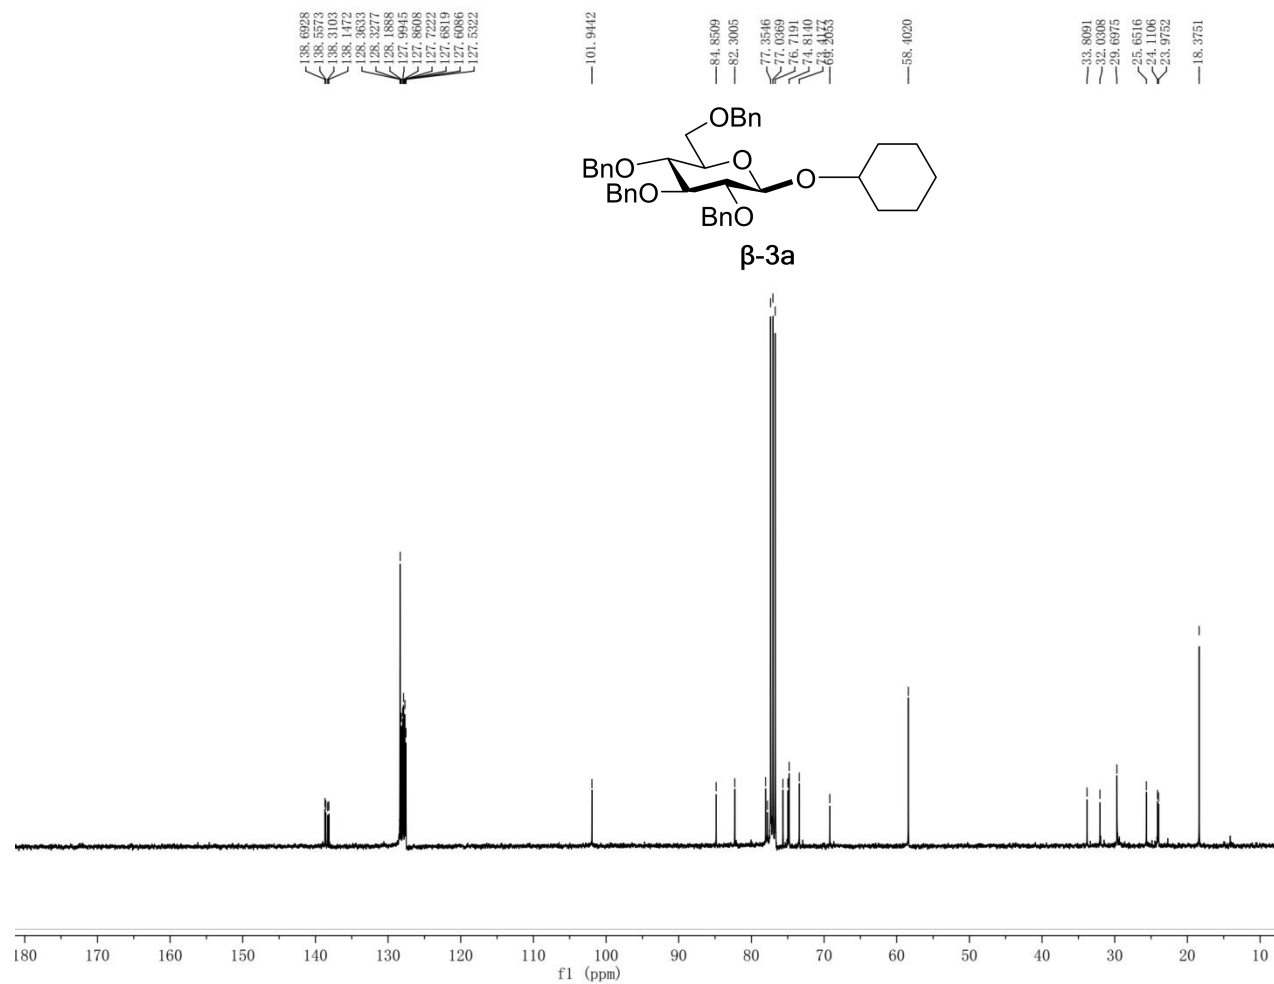

Figure S6.  $^{13}\text{C}$  NMR (400 MHz,  $\text{CDCl}_3$ ) spectrum of  $\beta$ -3a



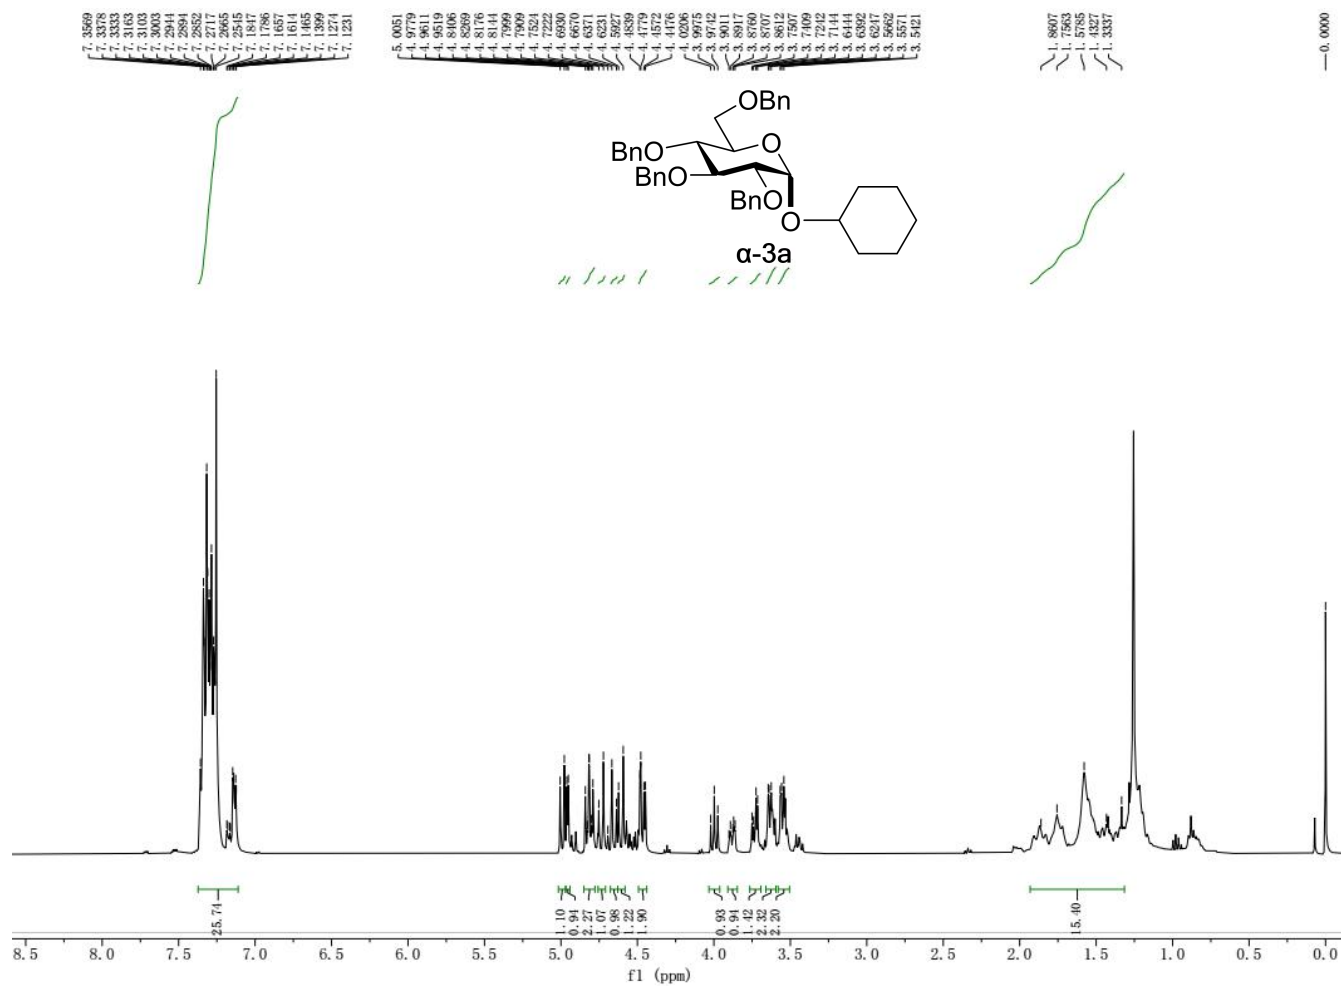

Figure S7.  $^1\text{H NMR}$  (400 MHz,  $\text{CDCl}_3$ ) spectrum of  $\alpha$ -3a

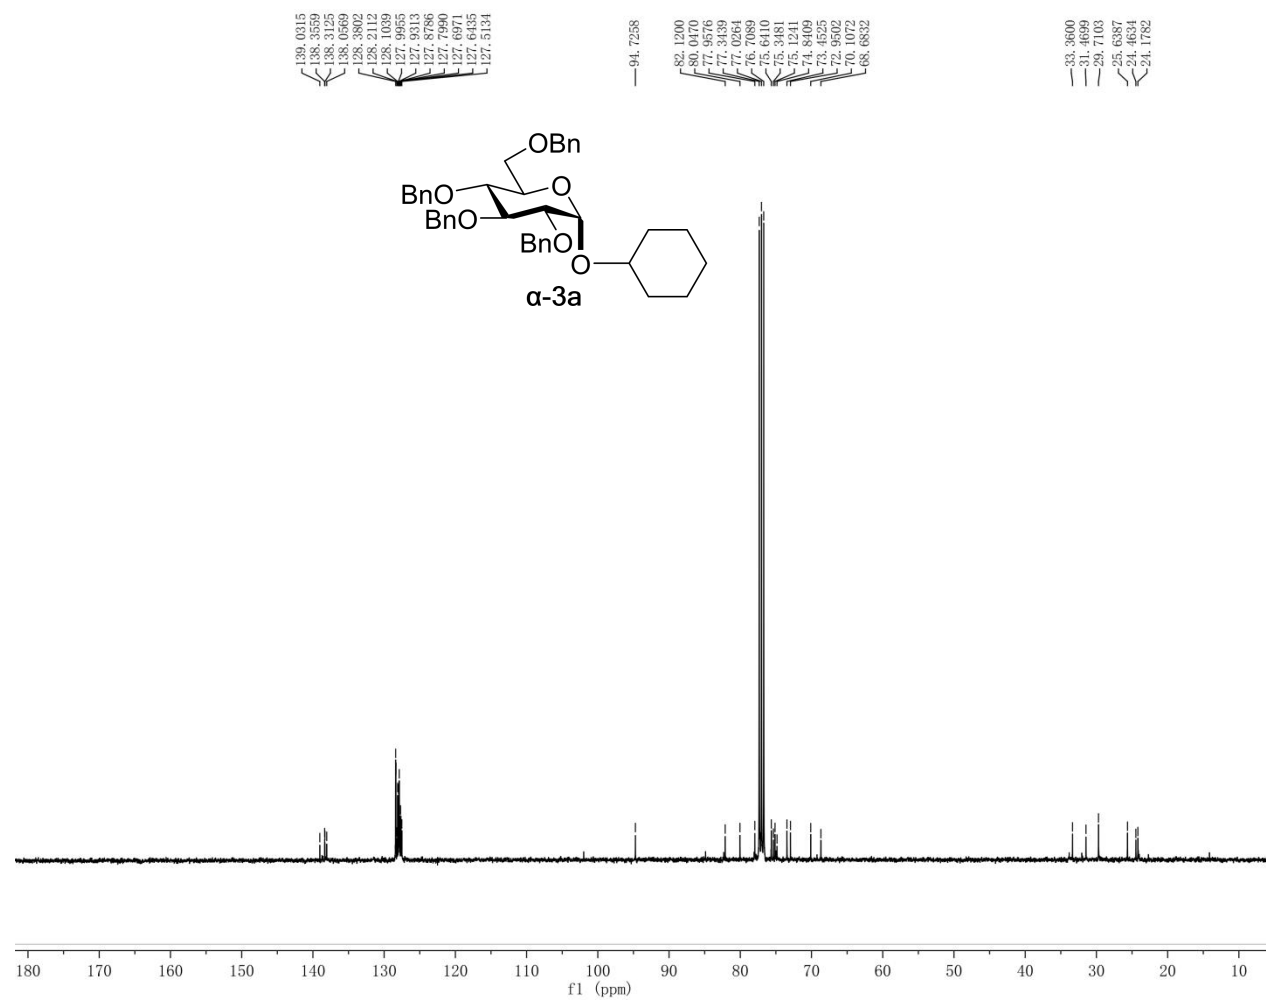

Figure S8.  $^{13}\text{C}$  NMR (400 MHz,  $\text{CDCl}_3$ ) spectrum of  $\alpha$ -3a

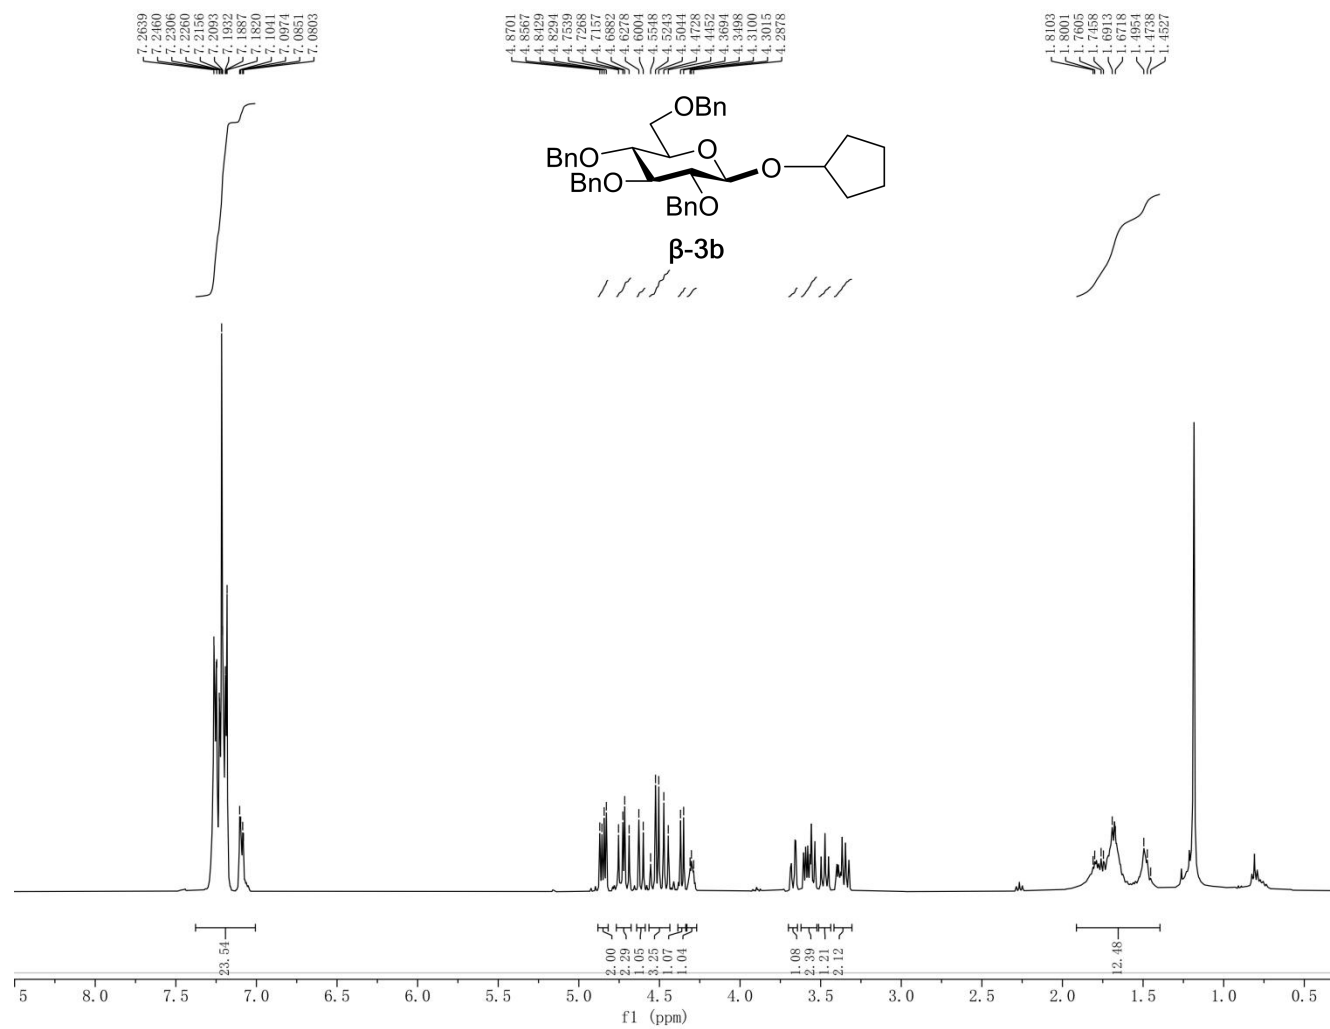

Figure S9.  $^1\text{H NMR}$  (400 MHz,  $\text{CDCl}_3$ ) spectrum of  $\beta$ -3b

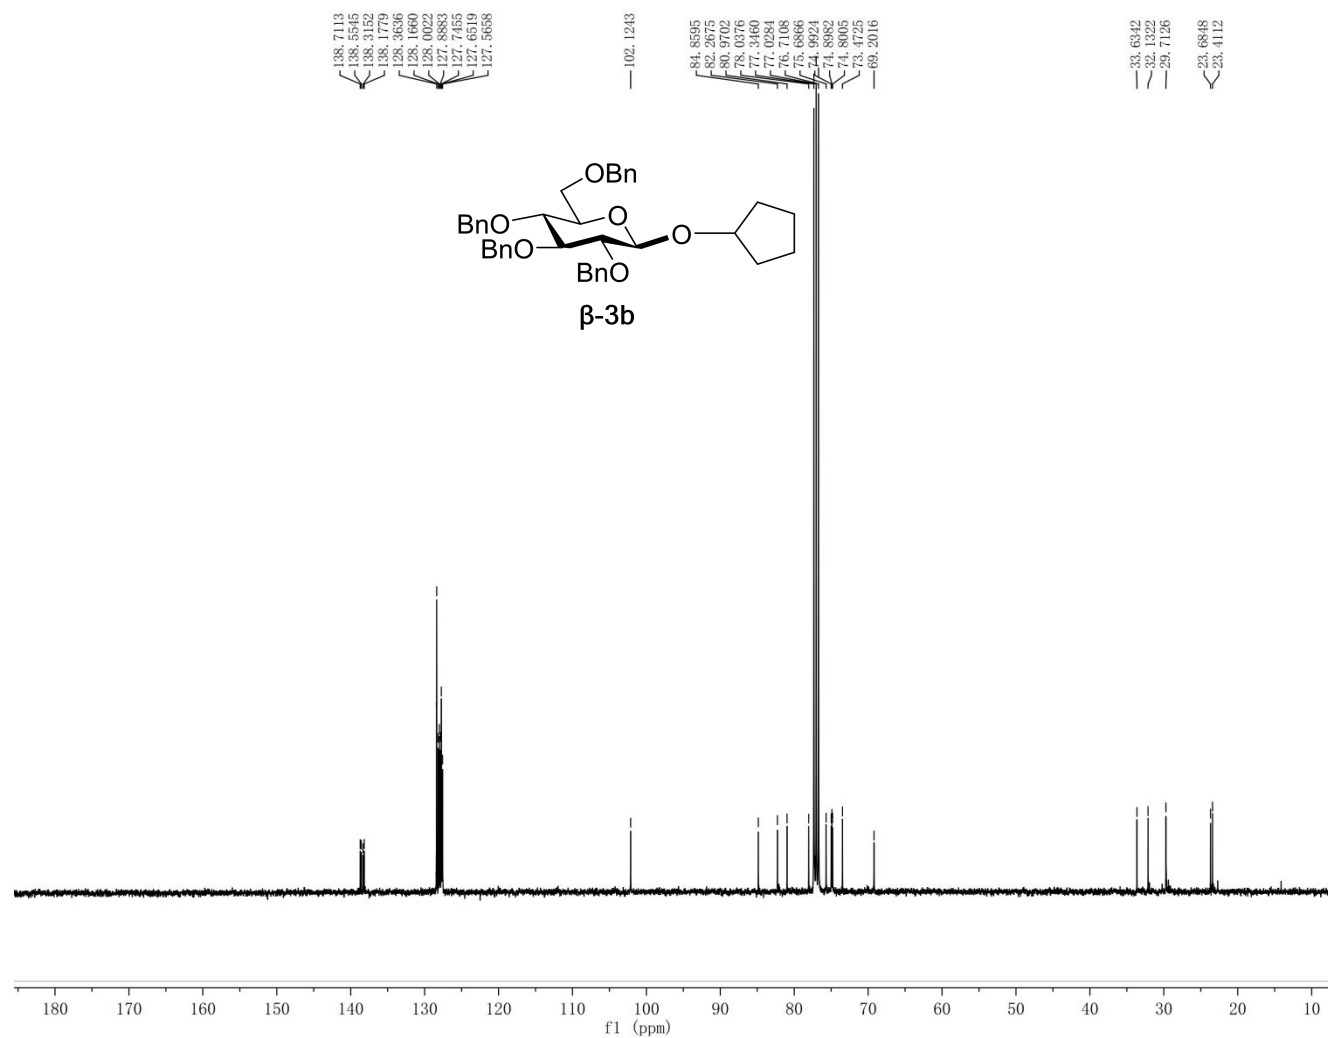

Figure S10. <sup>13</sup>C NMR (400 MHz, CDCl<sub>3</sub>) spectrum of **β-3b**

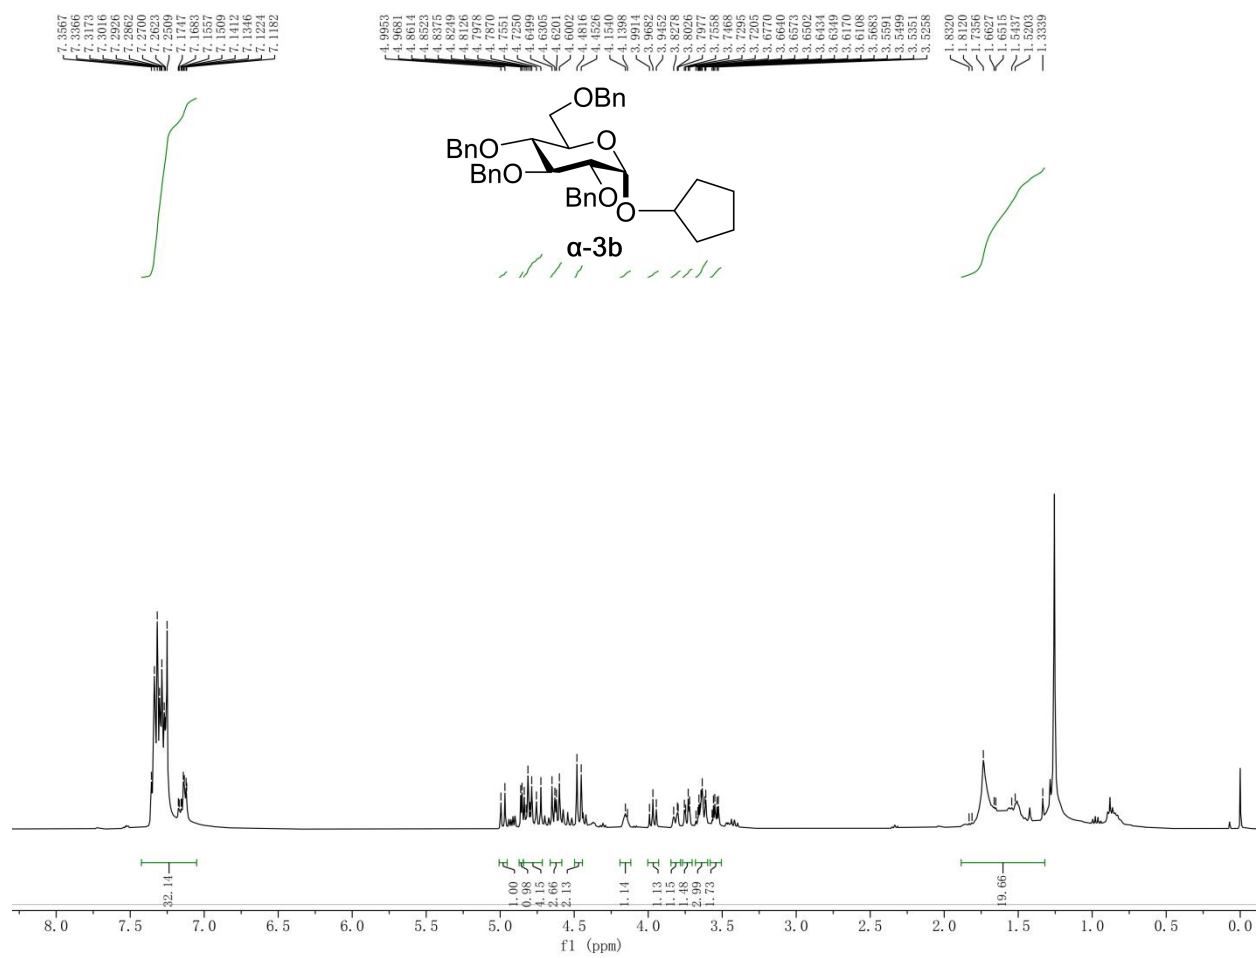

Figure S11.  $^1\text{H NMR}$  (400 MHz,  $\text{CDCl}_3$ ) spectrum of  $\alpha$ -3b

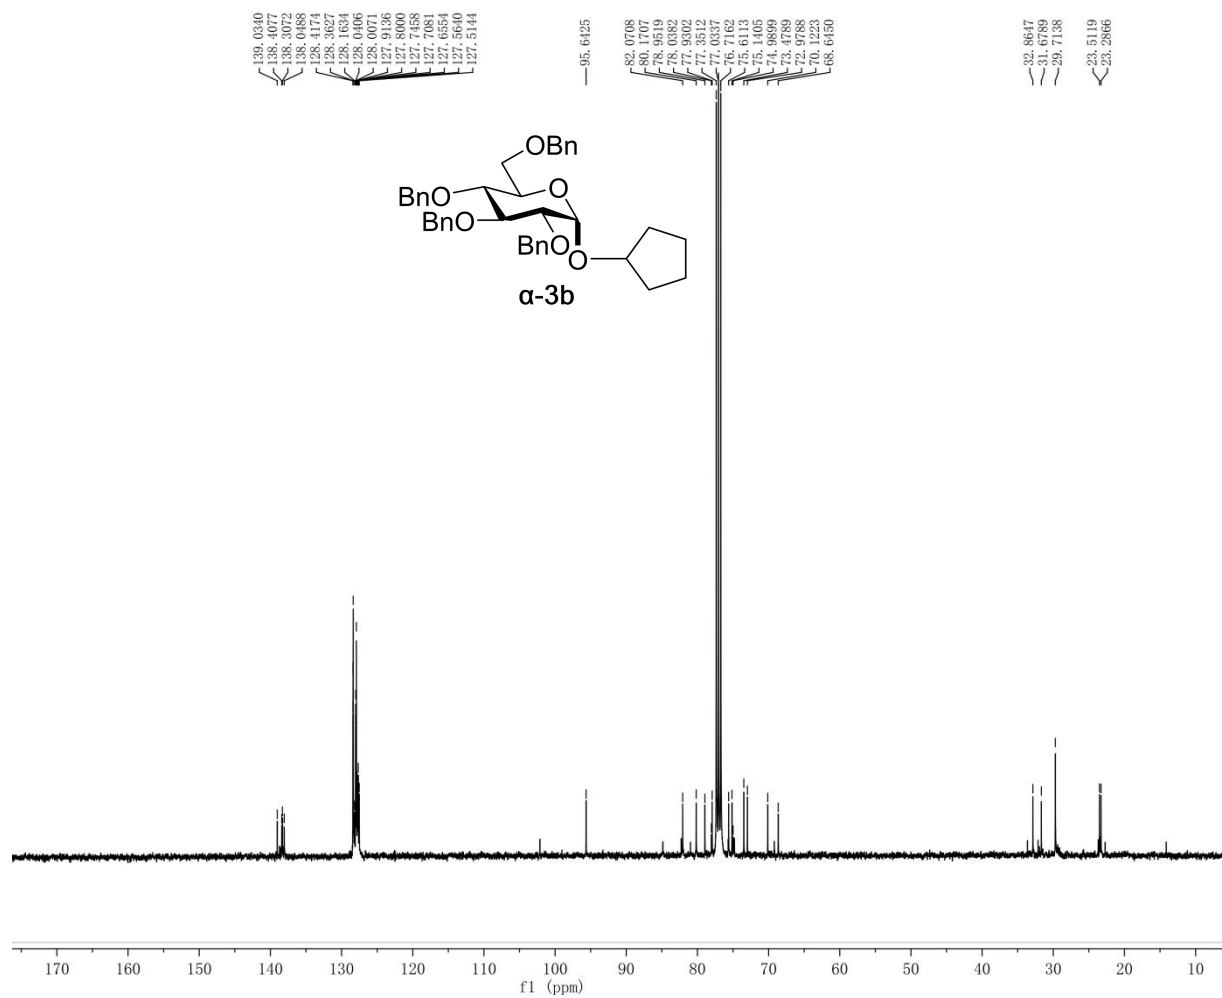

Figure S12.  $^{13}\text{C}$  NMR (400 MHz,  $\text{CDCl}_3$ ) spectrum of  $\alpha$ -3b

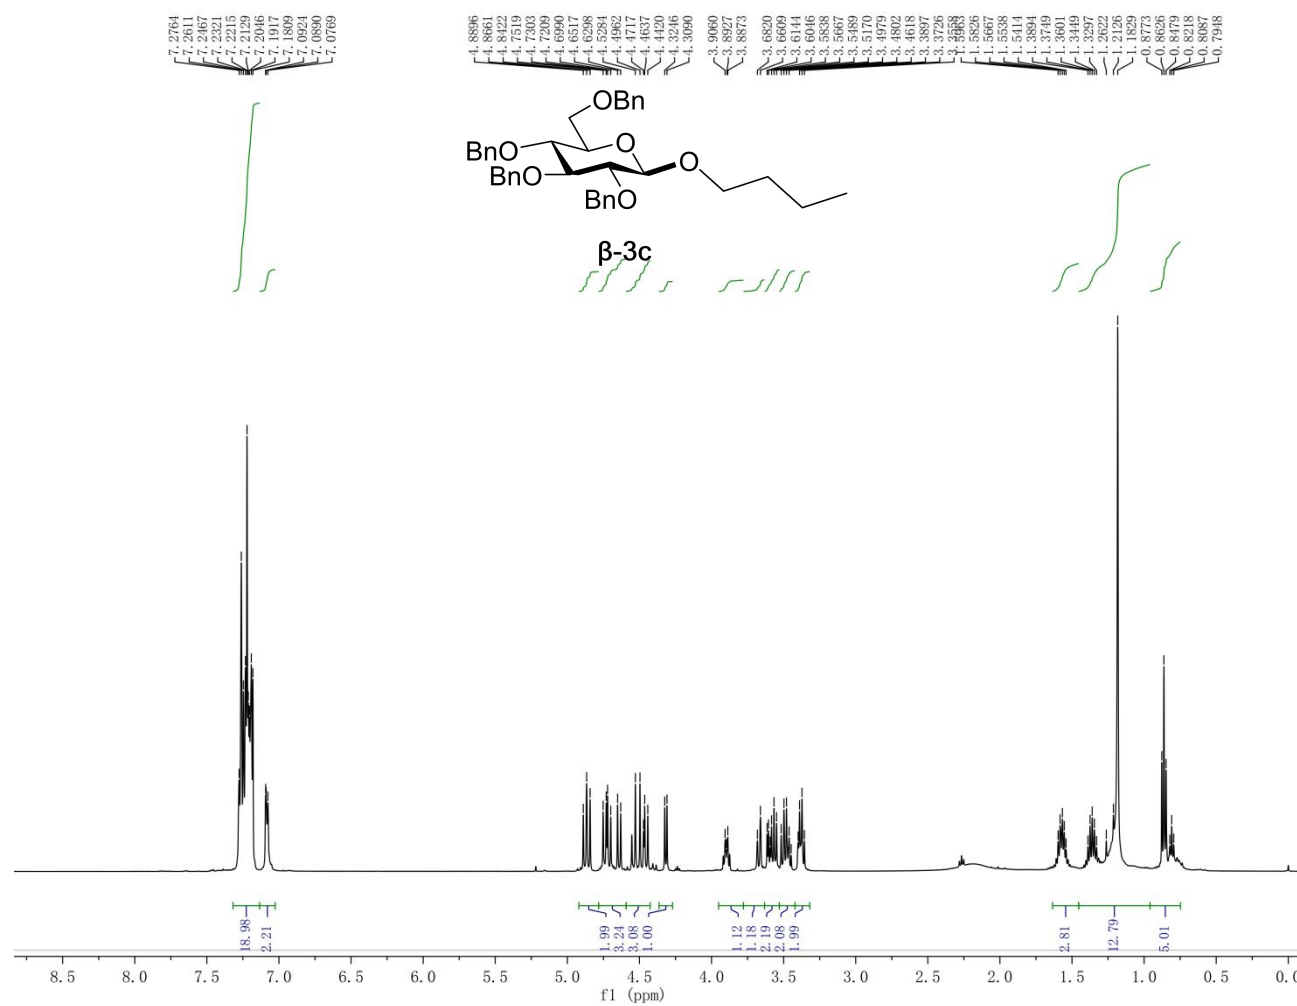

Figure S13.  $^1\text{H NMR}$  (400 MHz,  $\text{CDCl}_3$ ) spectrum of  $\beta$ -3c

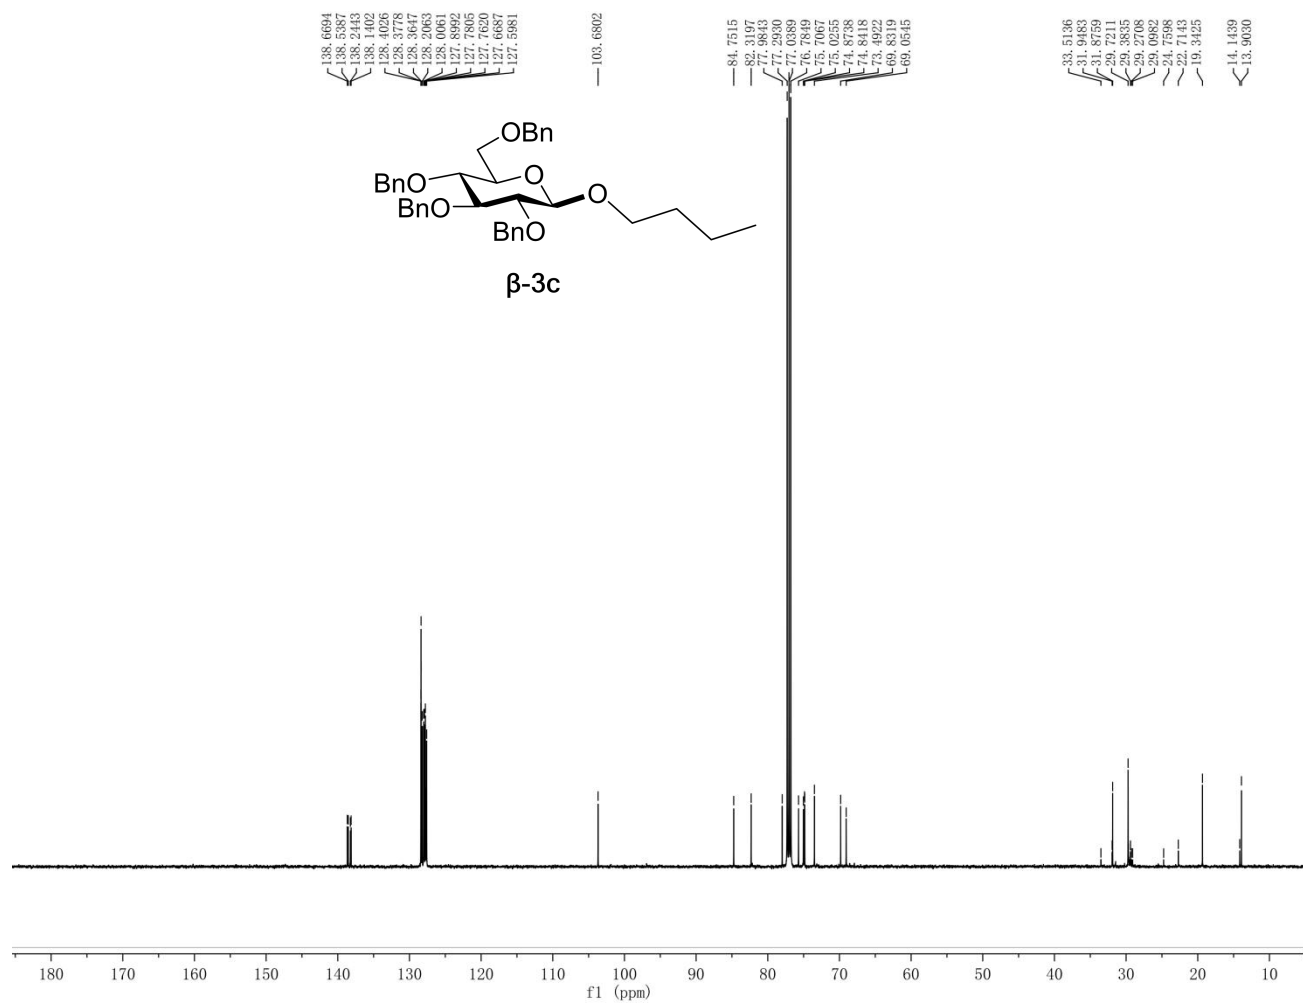

Figure S14.  $^{13}\text{C}$  NMR (400 MHz,  $\text{CDCl}_3$ ) spectrum of  $\beta$ -3c



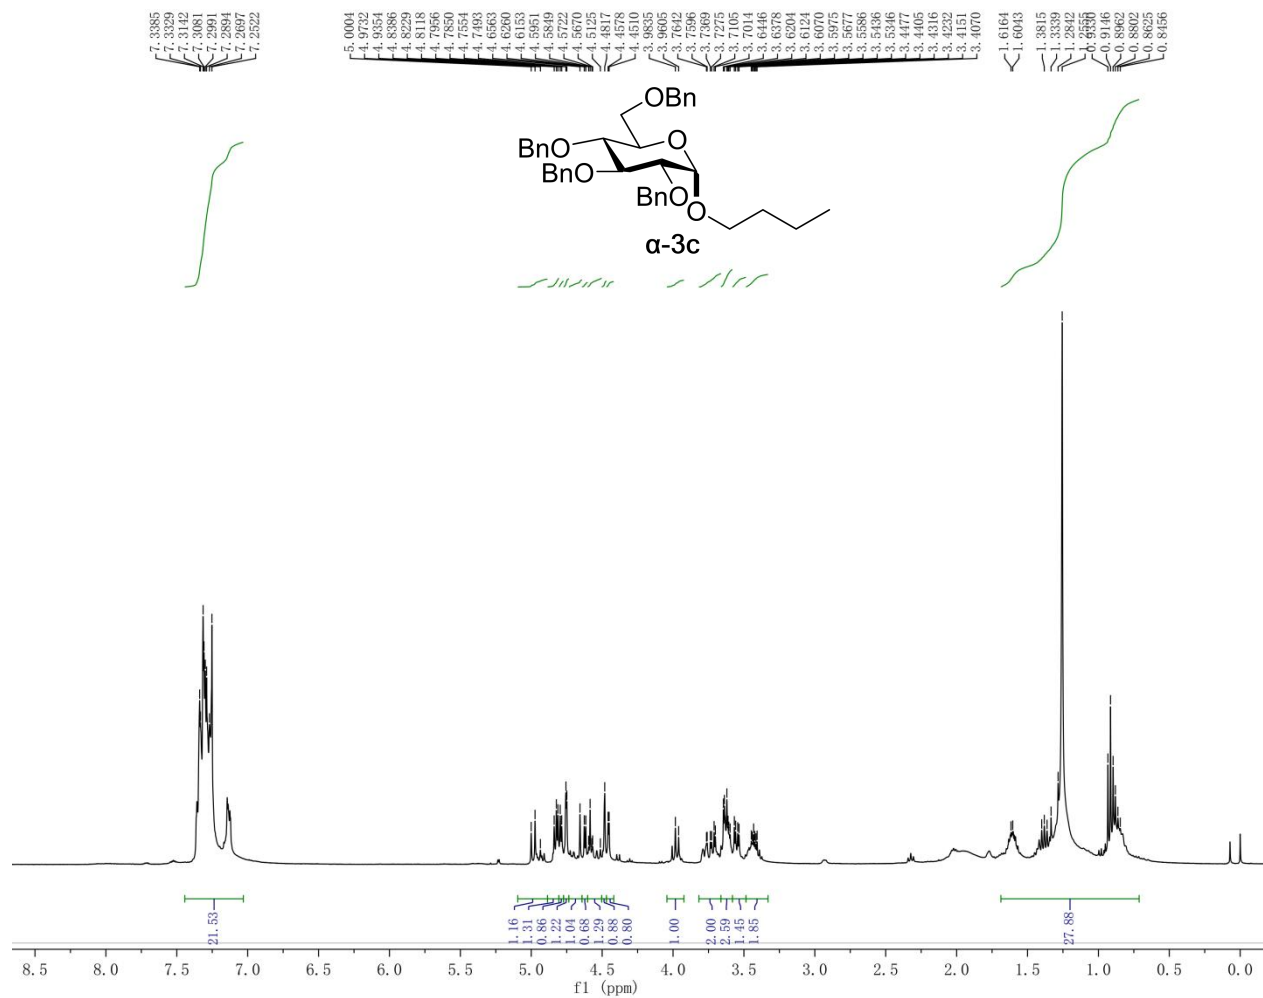

**Figure S15.** <sup>1</sup>H NMR (400 MHz, CDCl<sub>3</sub>) spectrum of **α-3c**

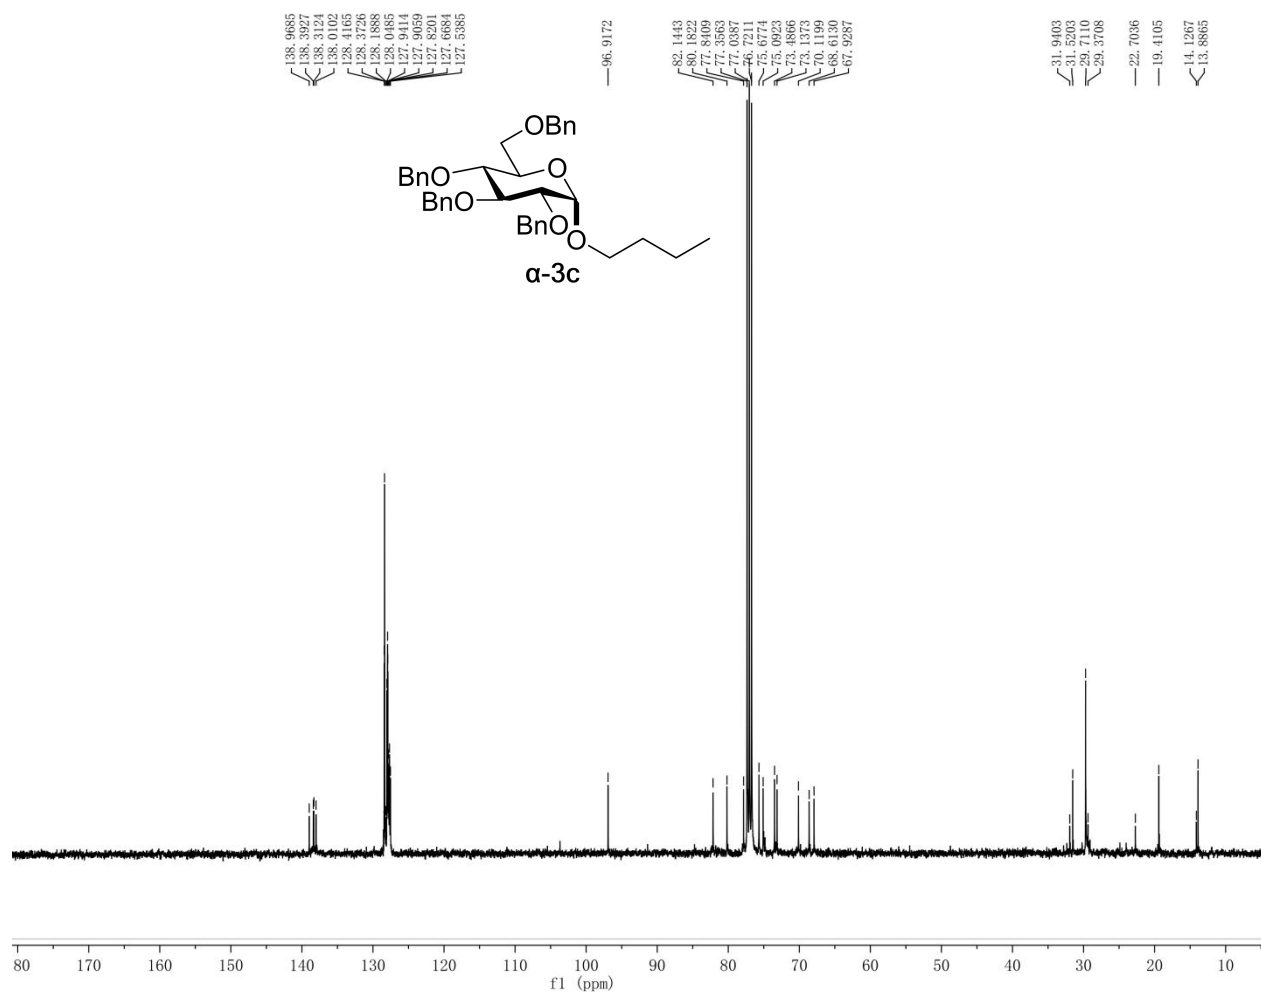

Figure S16. <sup>13</sup>C NMR (400 MHz, CDCl<sub>3</sub>) spectrum of **α-3c**

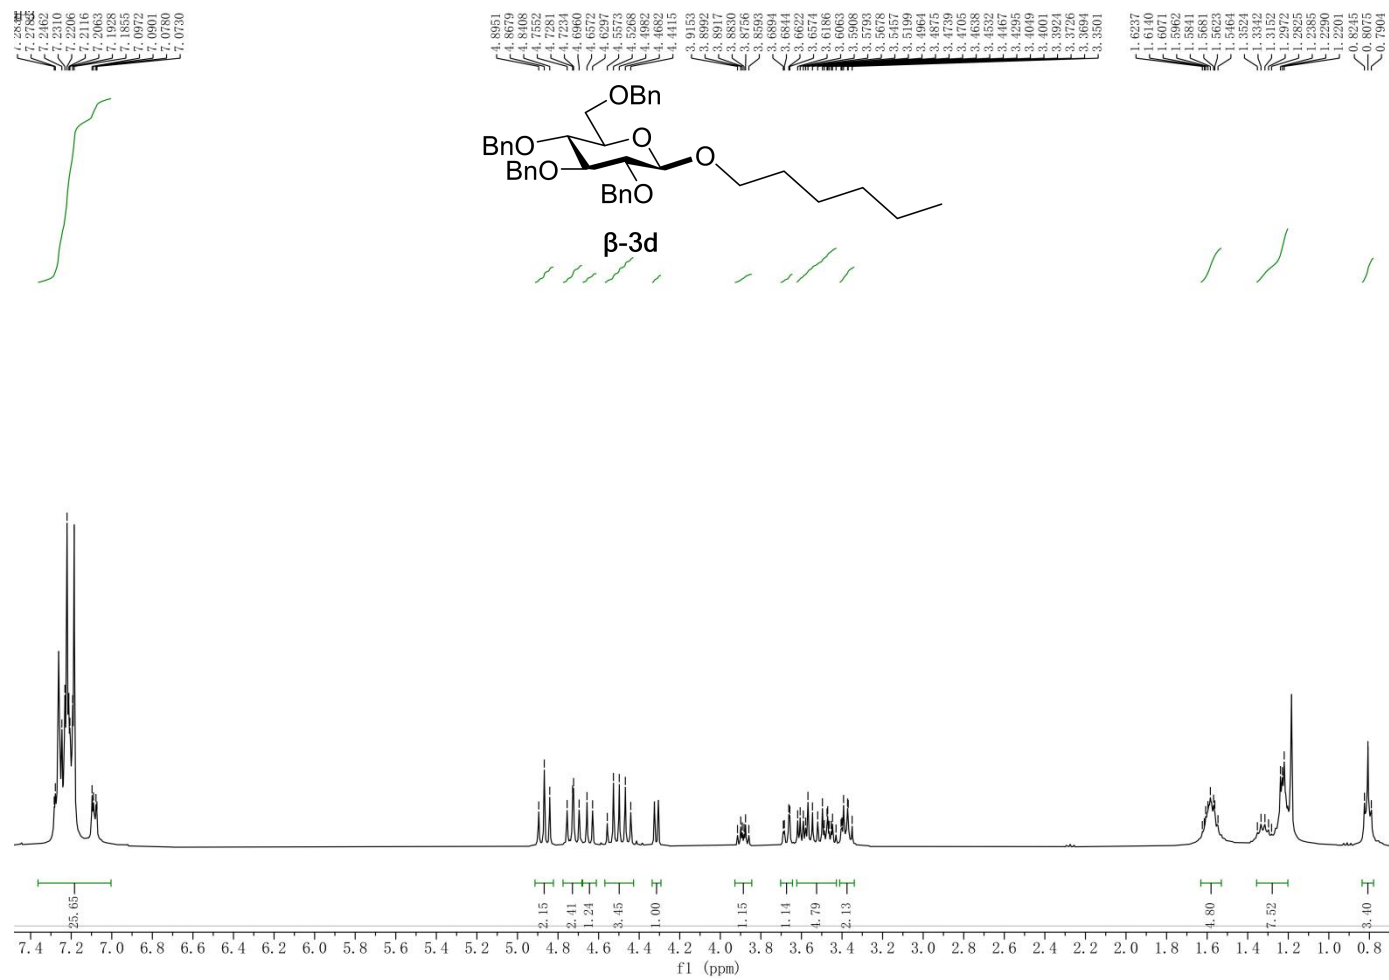

Figure S17.  $^1\text{H}$  NMR (400 MHz,  $\text{CDCl}_3$ ) spectrum of  $\beta$ -3d

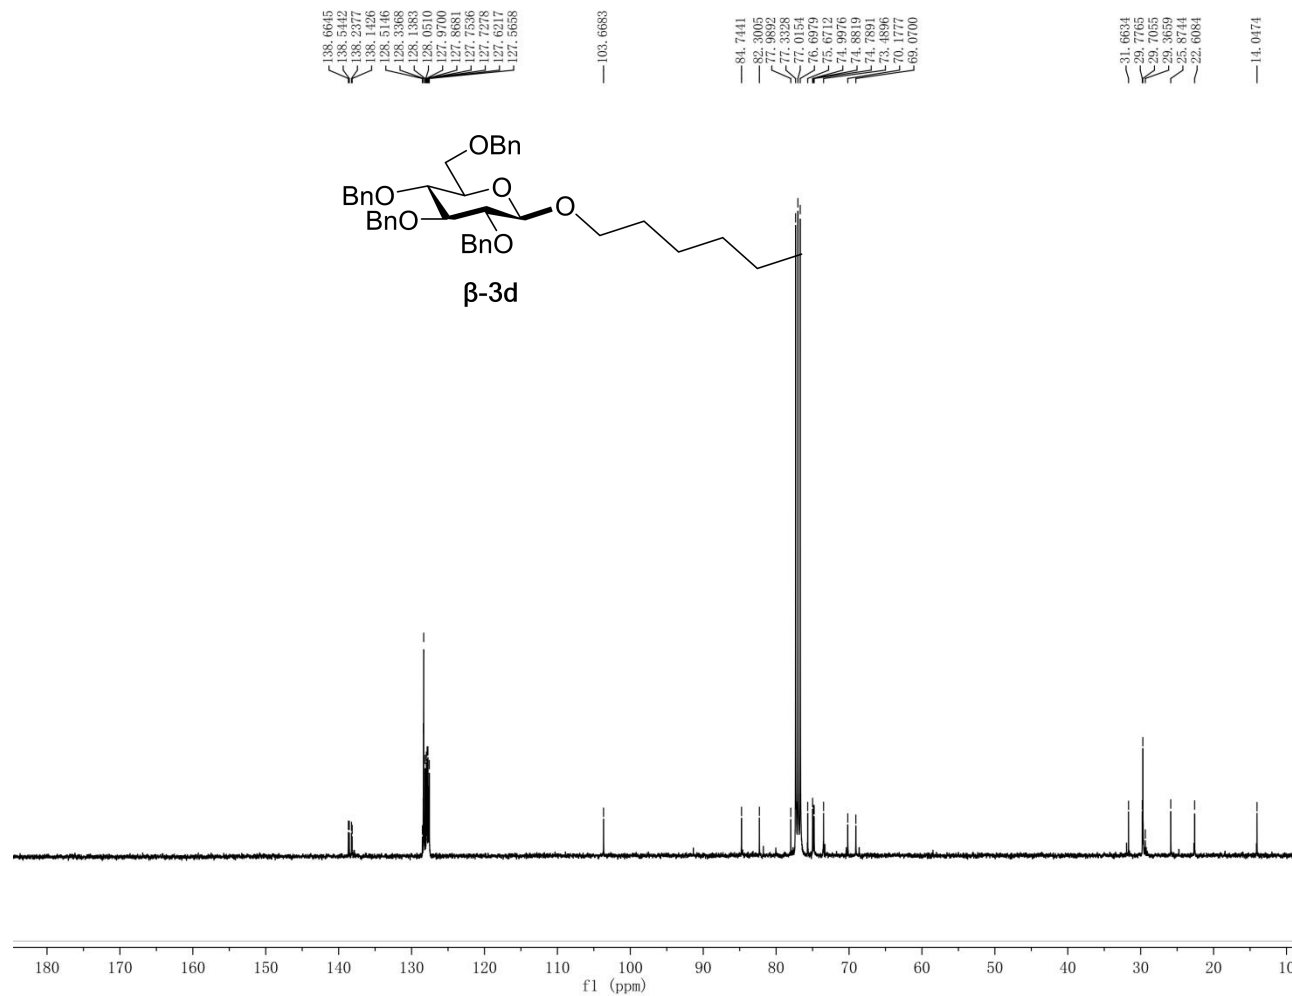

Figure S18.  $^{13}\text{C}$  NMR (400 MHz,  $\text{CDCl}_3$ ) spectrum of  $\beta$ -3d

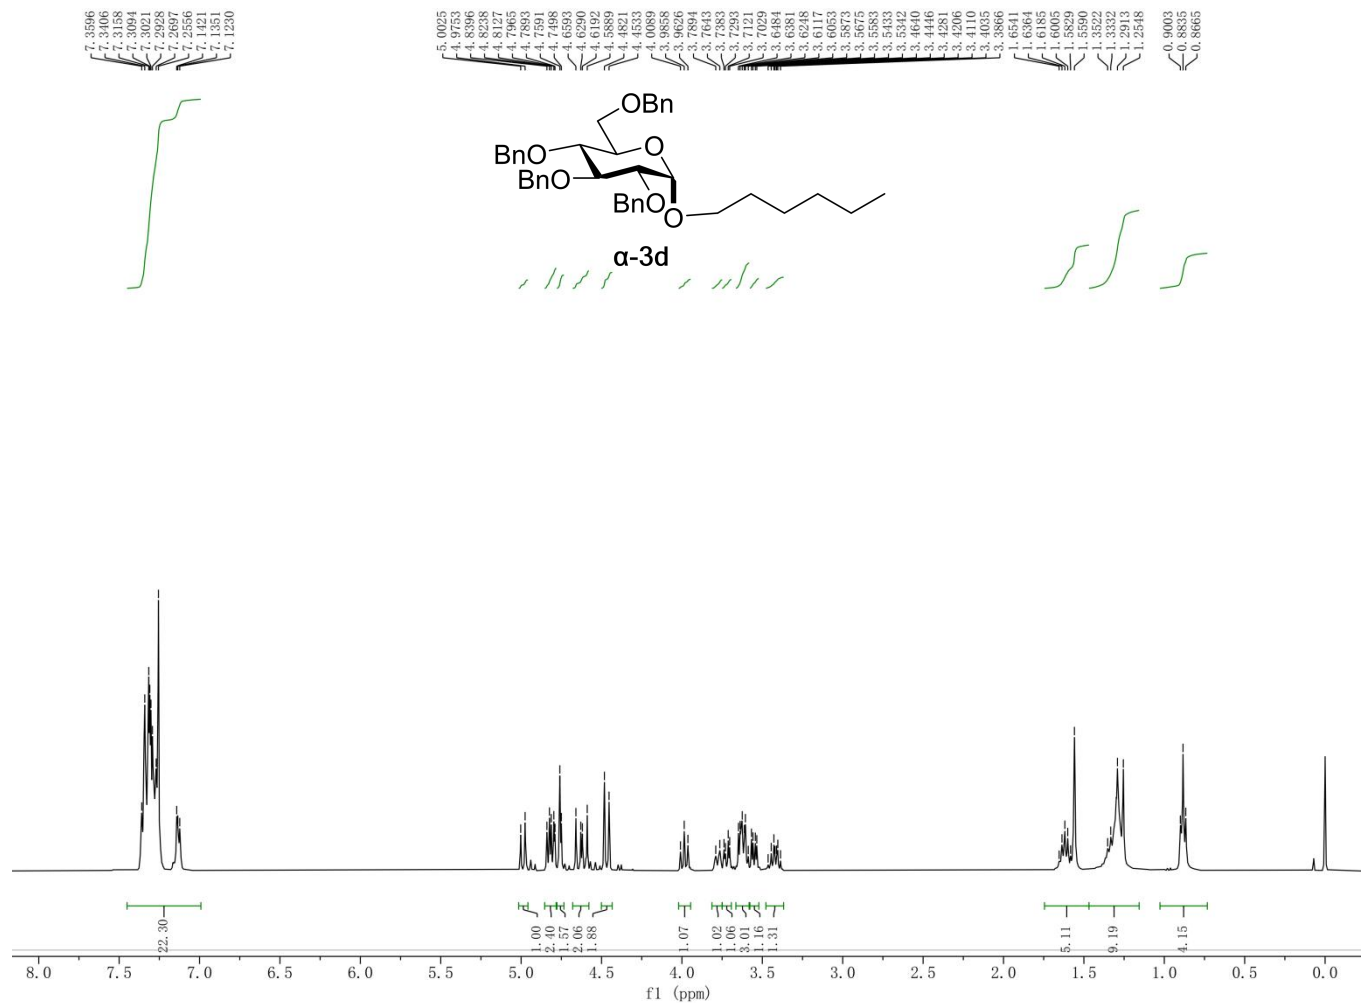

**Figure S19.** <sup>1</sup>H NMR (400 MHz, CDCl<sub>3</sub>) spectrum of **α-3d**

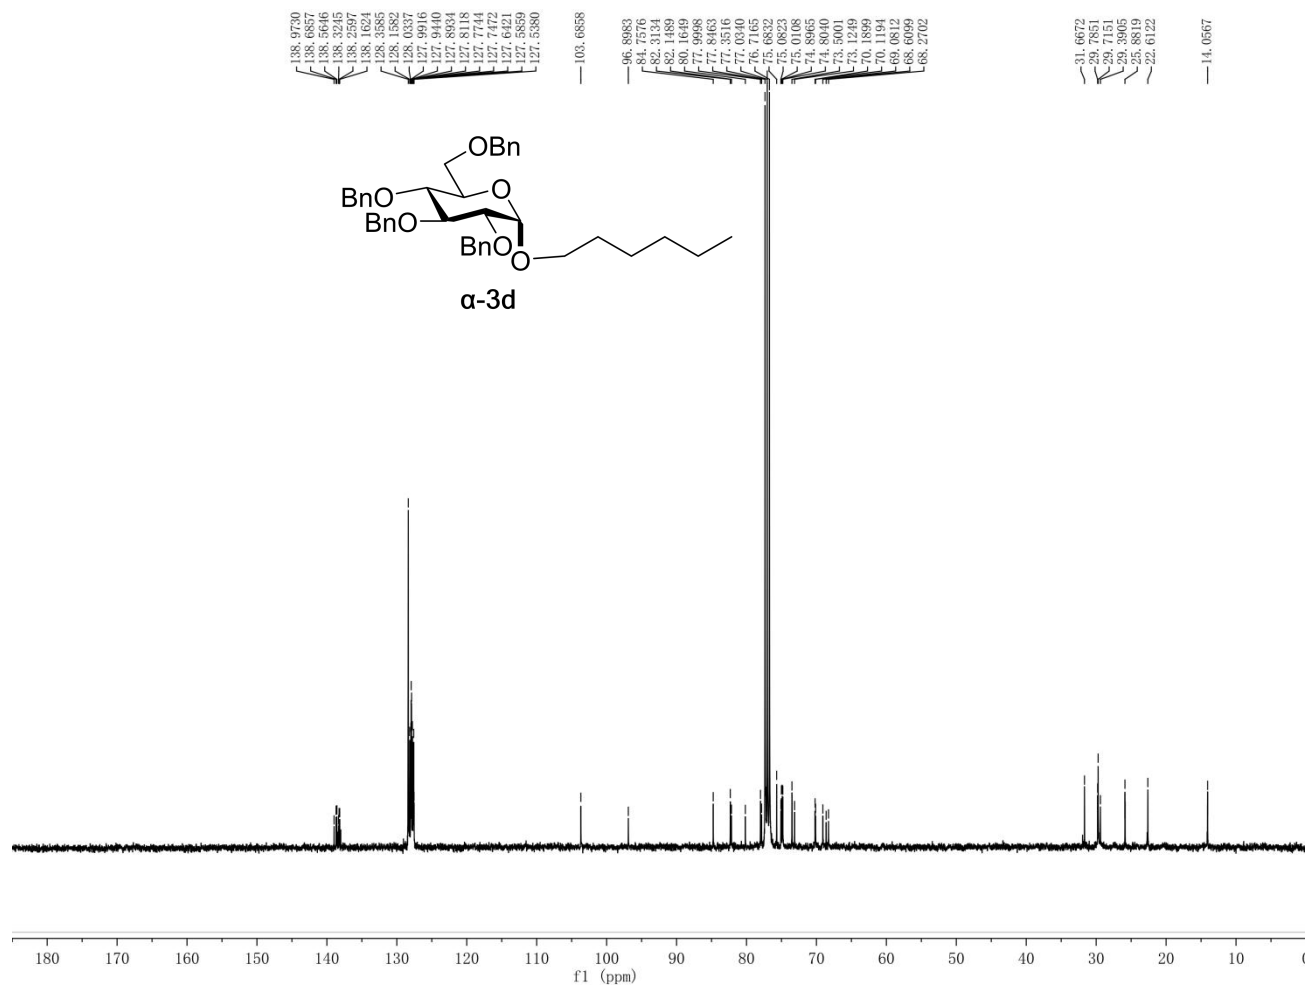

Figure S20. <sup>13</sup>C NMR (400 MHz, CDCl<sub>3</sub>) spectrum of **α-3d**

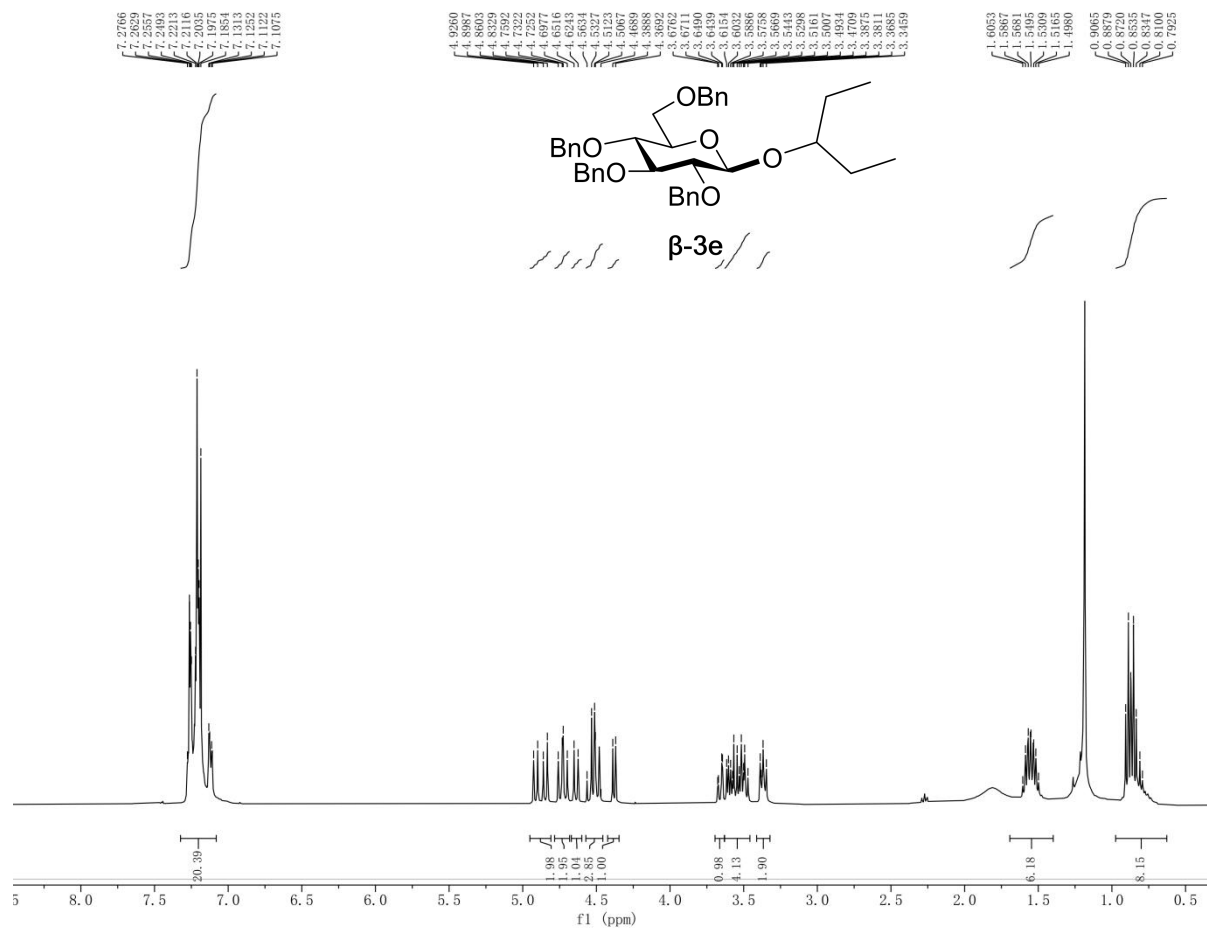

Figure S21.  $^1\text{H NMR}$  (400 MHz,  $\text{CDCl}_3$ ) spectrum of  $\beta$ -3e

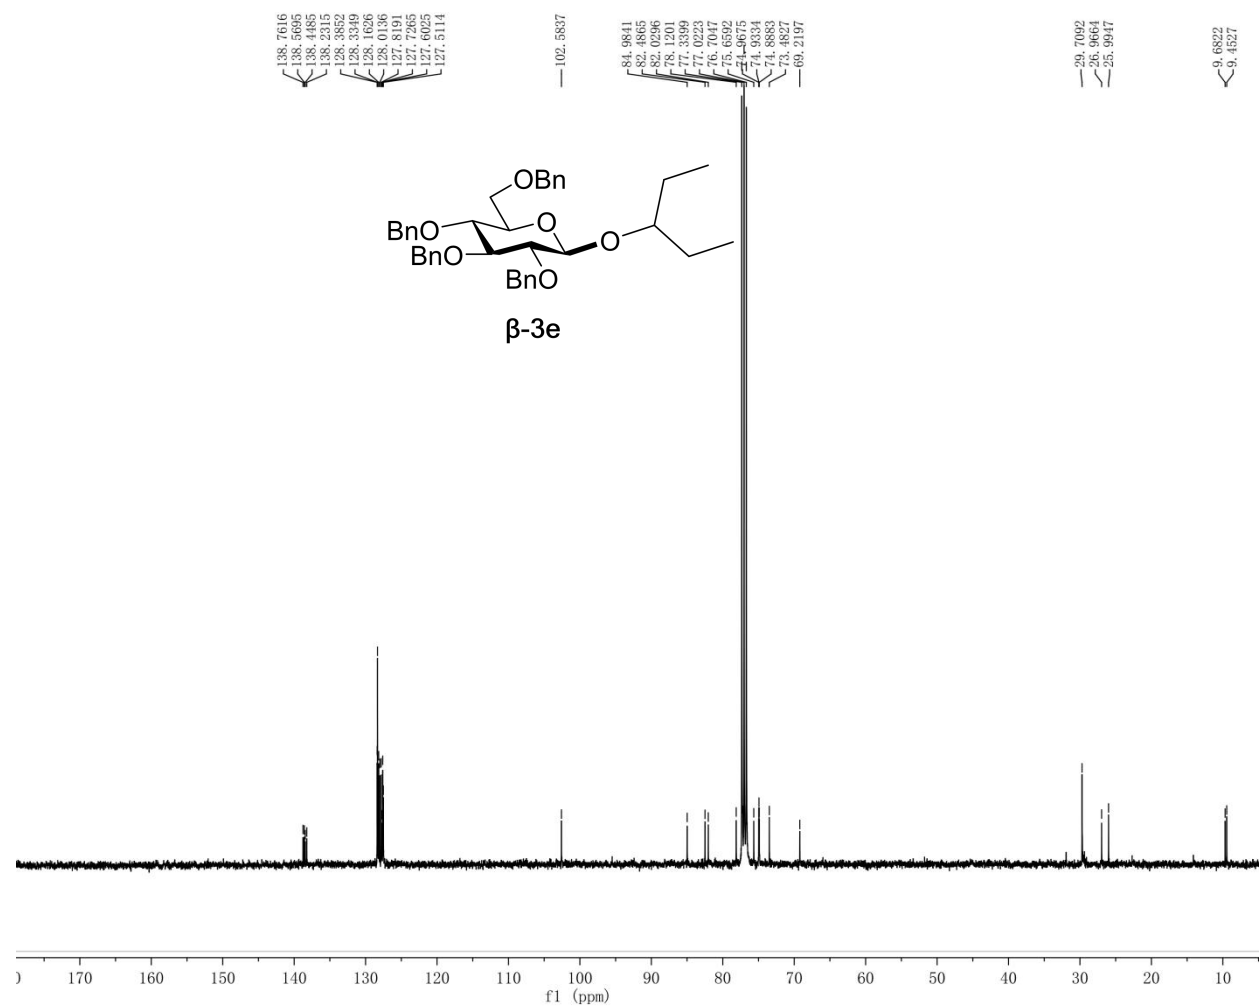

Figure S22.  $^{13}\text{C}$  NMR (400 MHz,  $\text{CDCl}_3$ ) spectrum of  $\beta$ -3e



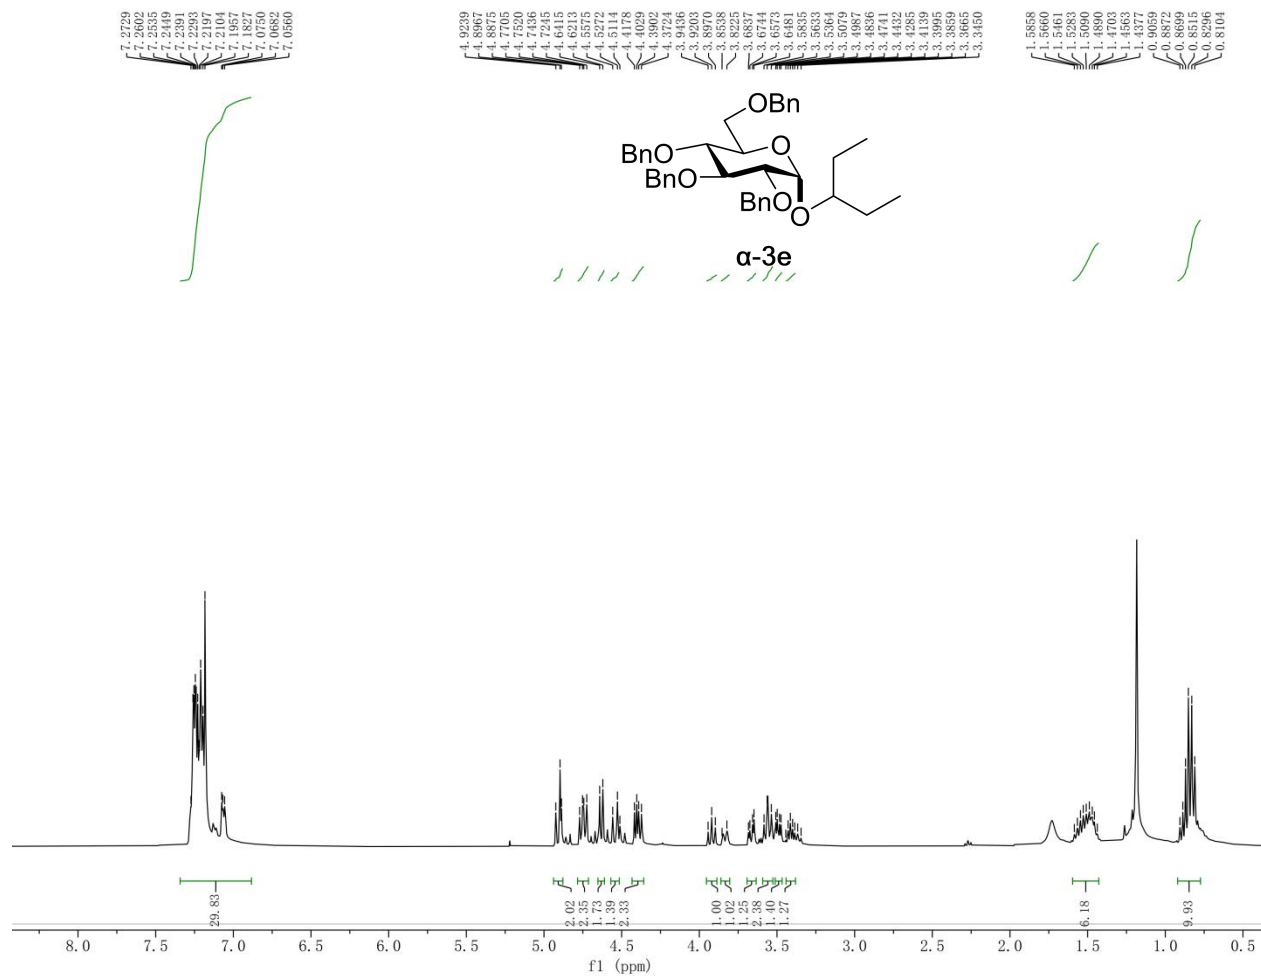

Figure S23.  $^1\text{H NMR}$  (400 MHz,  $\text{CDCl}_3$ ) spectrum of  $\alpha$ -3e

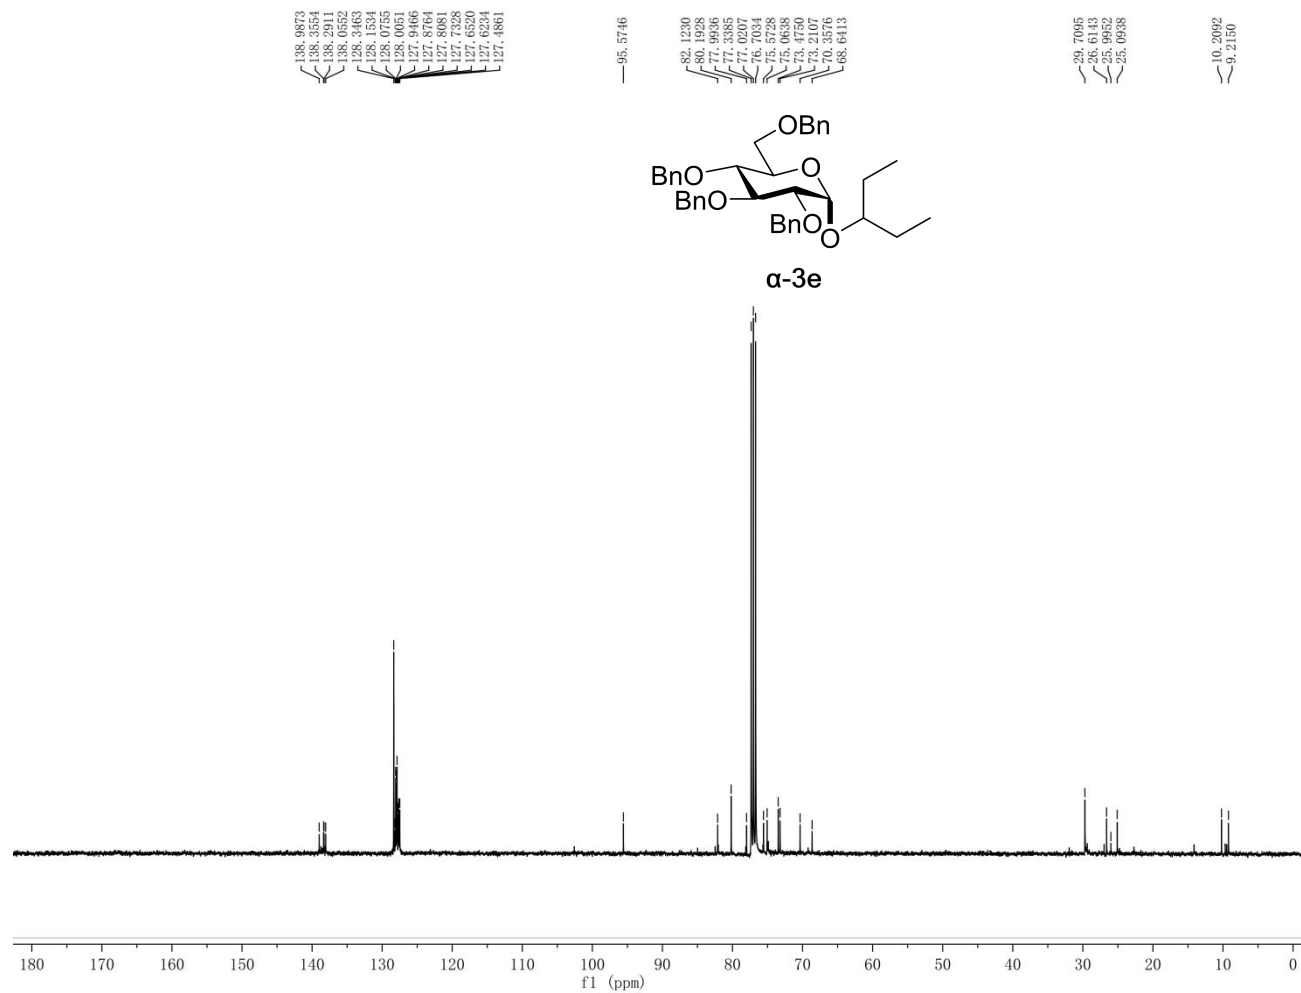

Figure S24.  $^{13}\text{C}$  NMR (400 MHz,  $\text{CDCl}_3$ ) spectrum of  $\alpha$ -3e

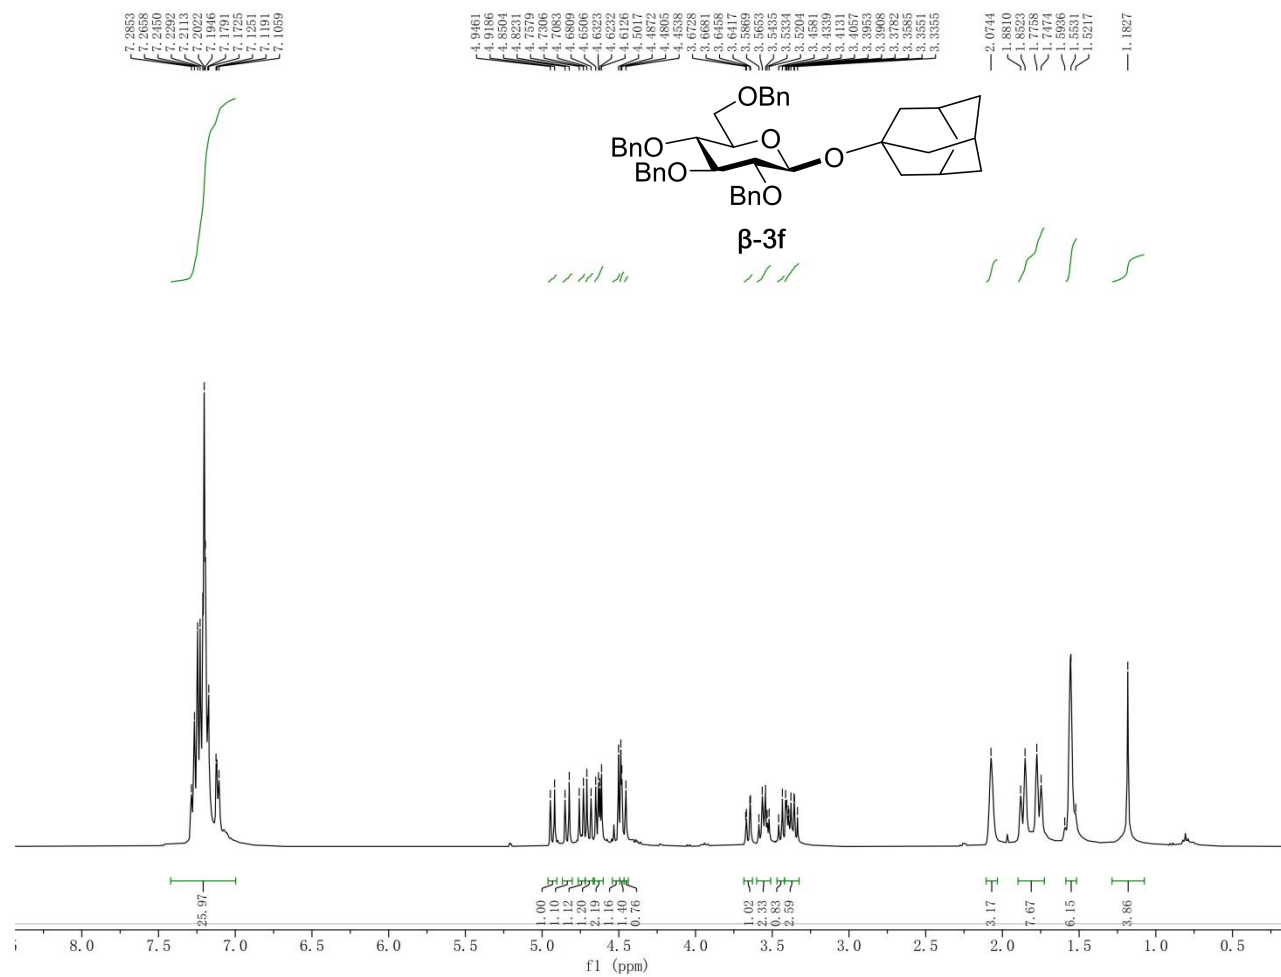

Figure S25.  $^1\text{H NMR}$  (400 MHz,  $\text{CDCl}_3$ ) spectrum of  $\beta$ -3f

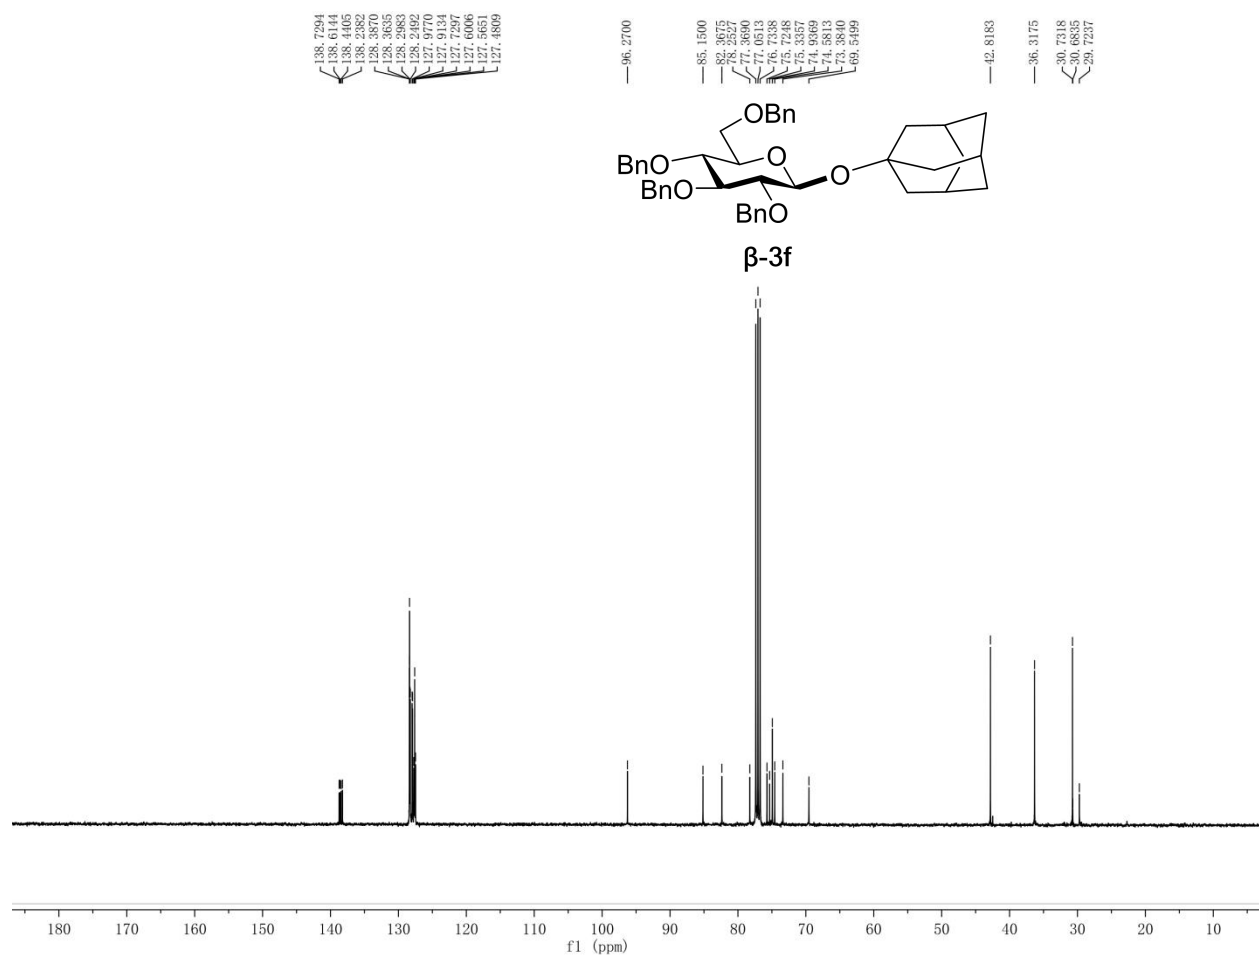

Figure S26.  $^{13}\text{C}$  NMR (400 MHz,  $\text{CDCl}_3$ ) spectrum of  $\beta$ -3f

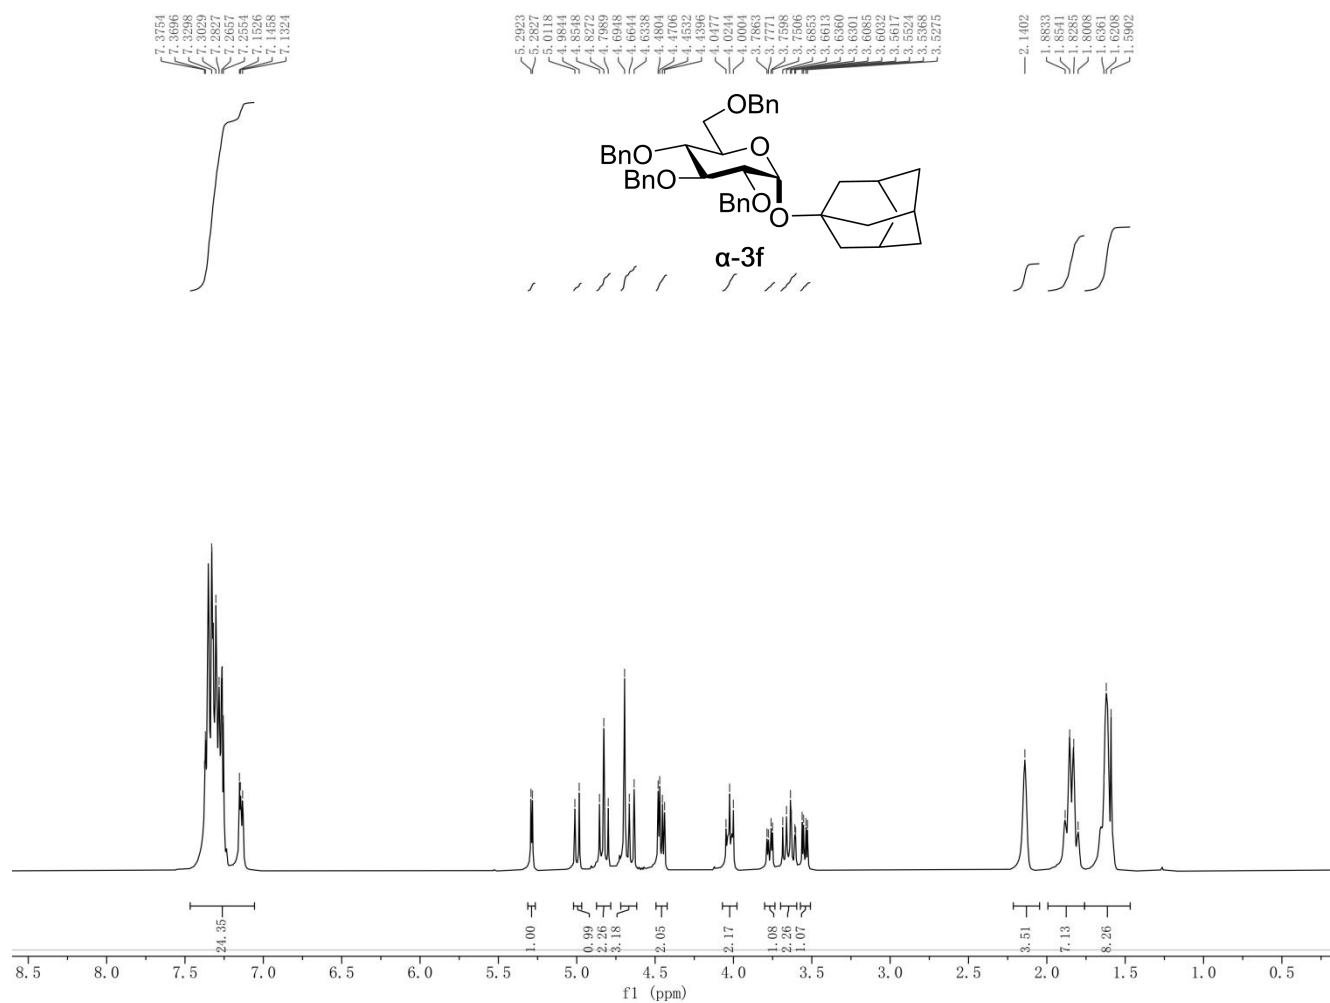

Figure S27.  $^1\text{H}$  NMR (400 MHz,  $\text{CDCl}_3$ ) spectrum of  $\alpha$ -3f

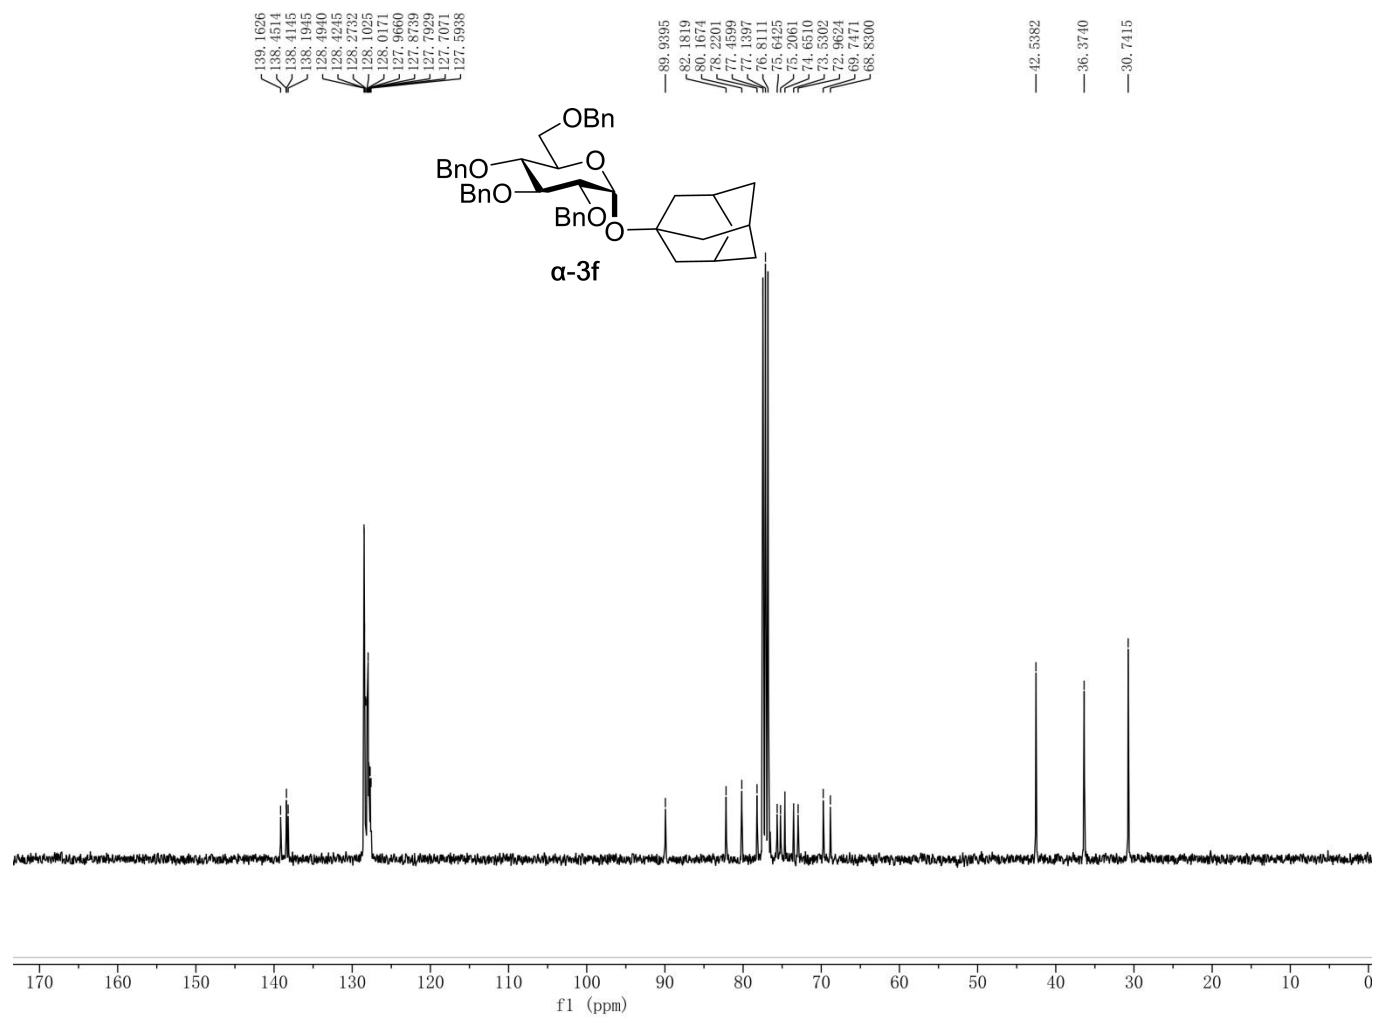

Figure S28. <sup>13</sup>C NMR (400 MHz, CDCl<sub>3</sub>) spectrum of **α-3f**

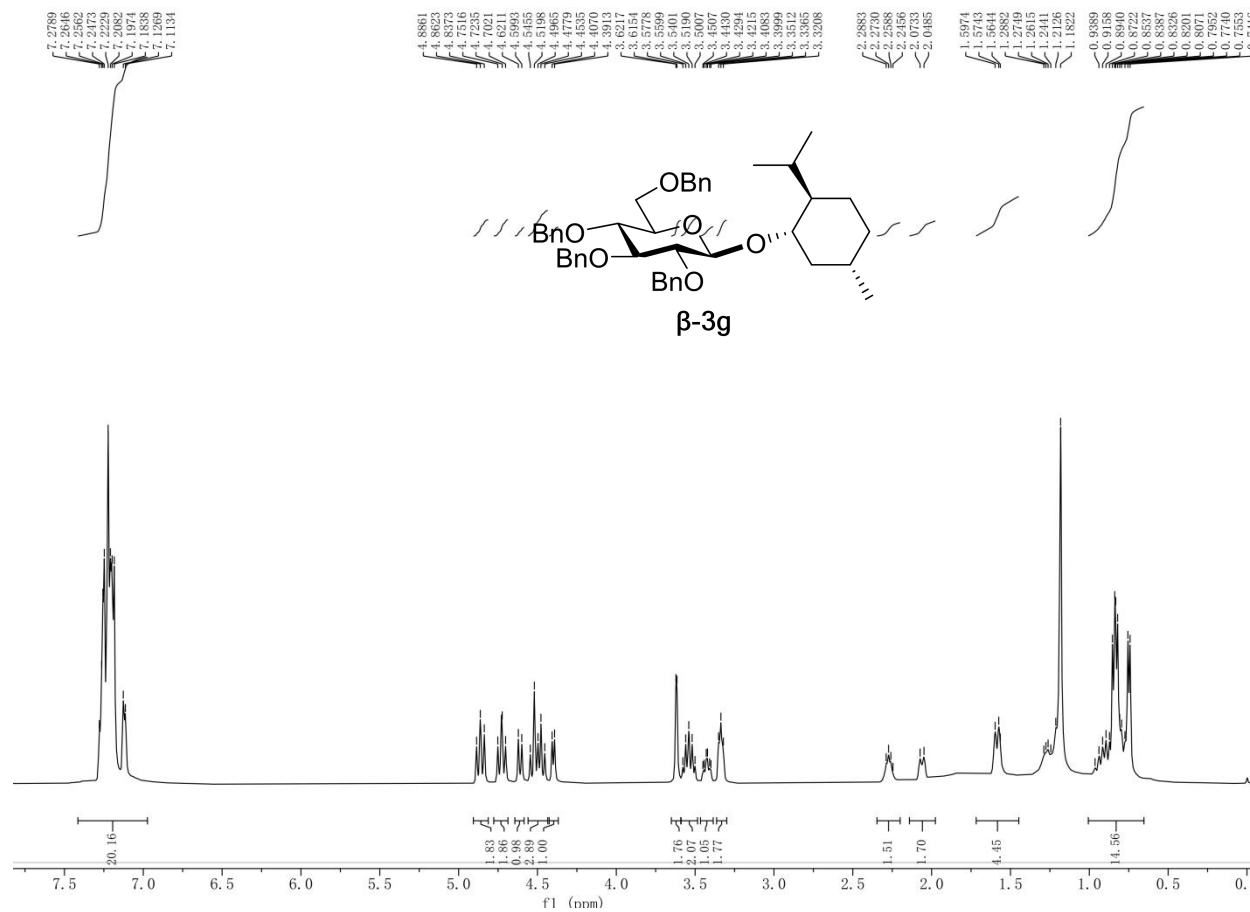

Figure S29.  $^1\text{H NMR}$  (400 MHz,  $\text{CDCl}_3$ ) spectrum of  $\beta$ -3g

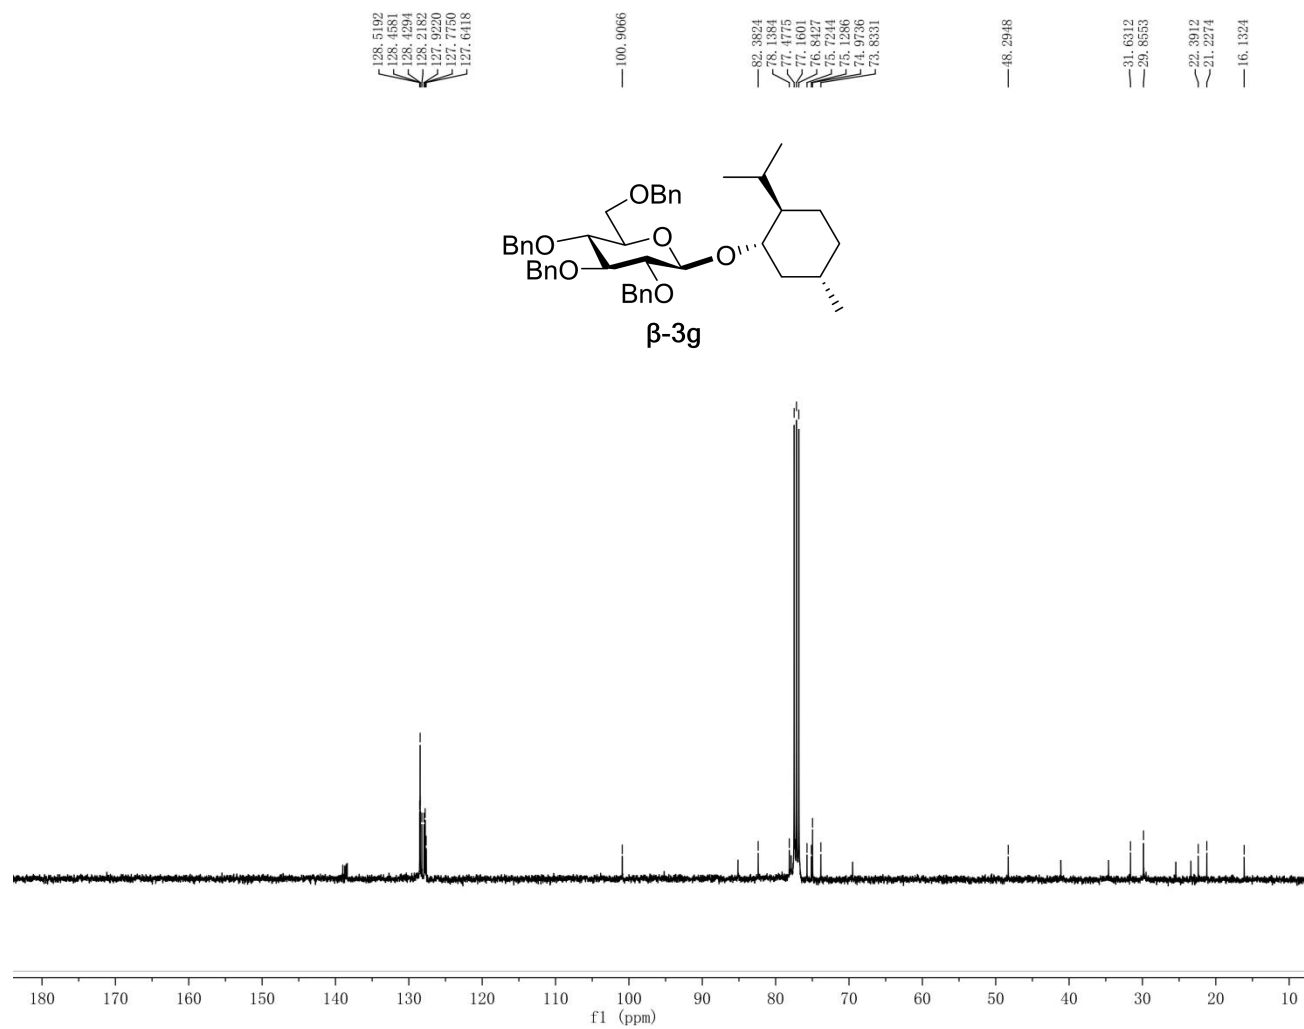

Figure S30. <sup>13</sup>C NMR (400 MHz, CDCl<sub>3</sub>) spectrum of **β-3g**



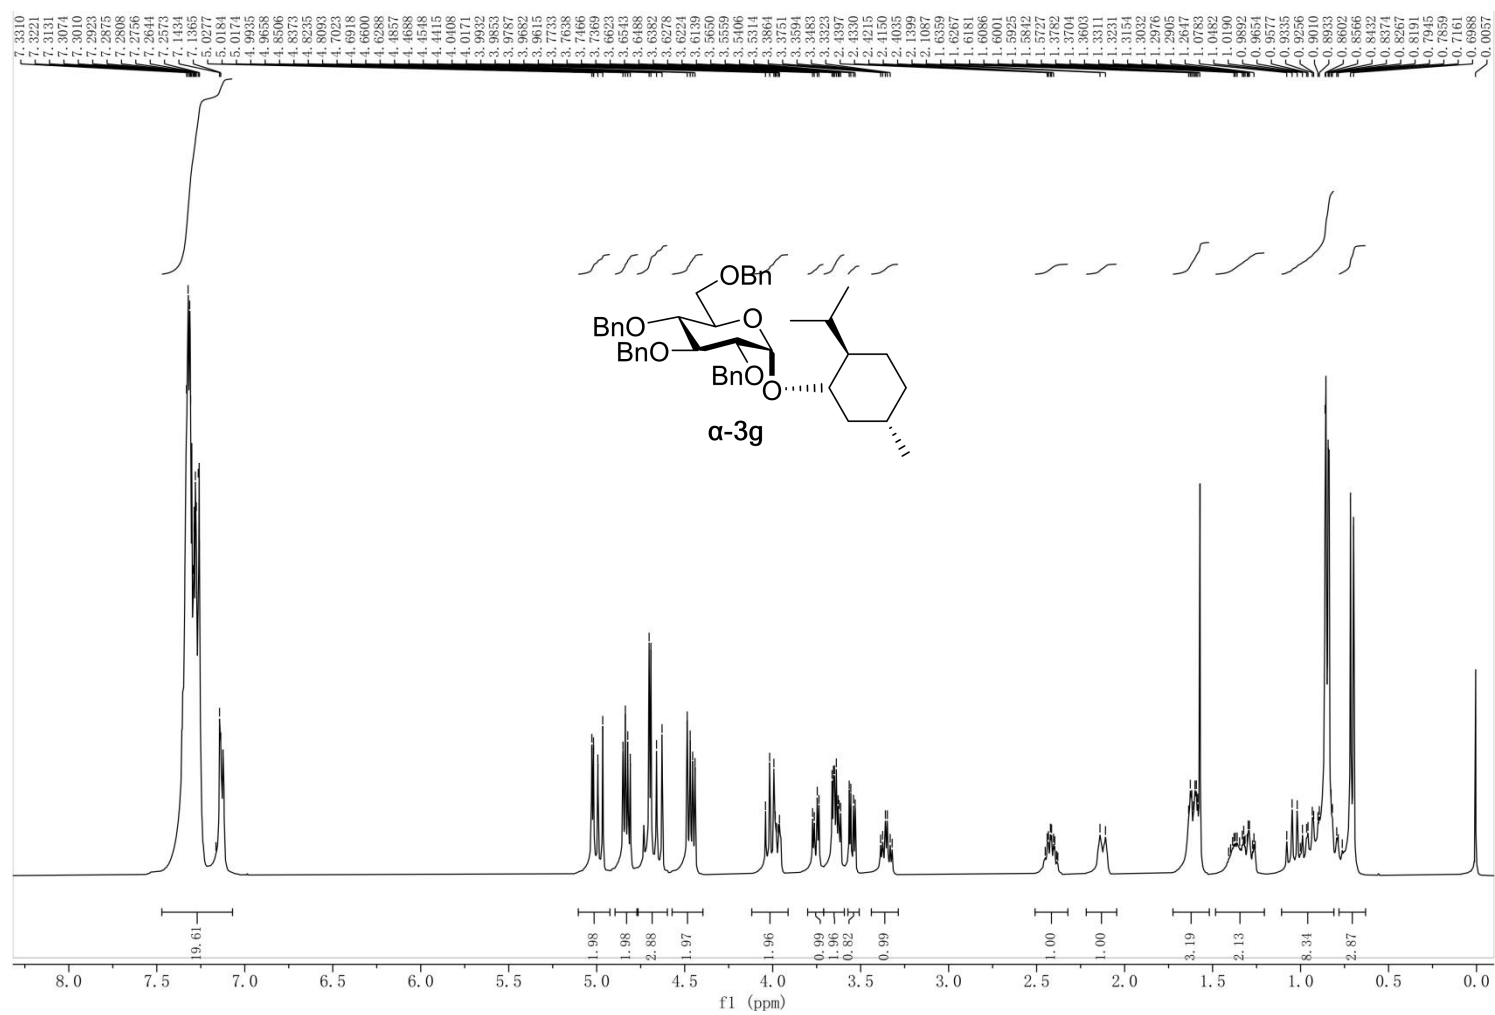

Figure S31.  $^1\text{H}$  NMR (400 MHz,  $\text{CDCl}_3$ ) spectrum of  $\alpha$ -3g

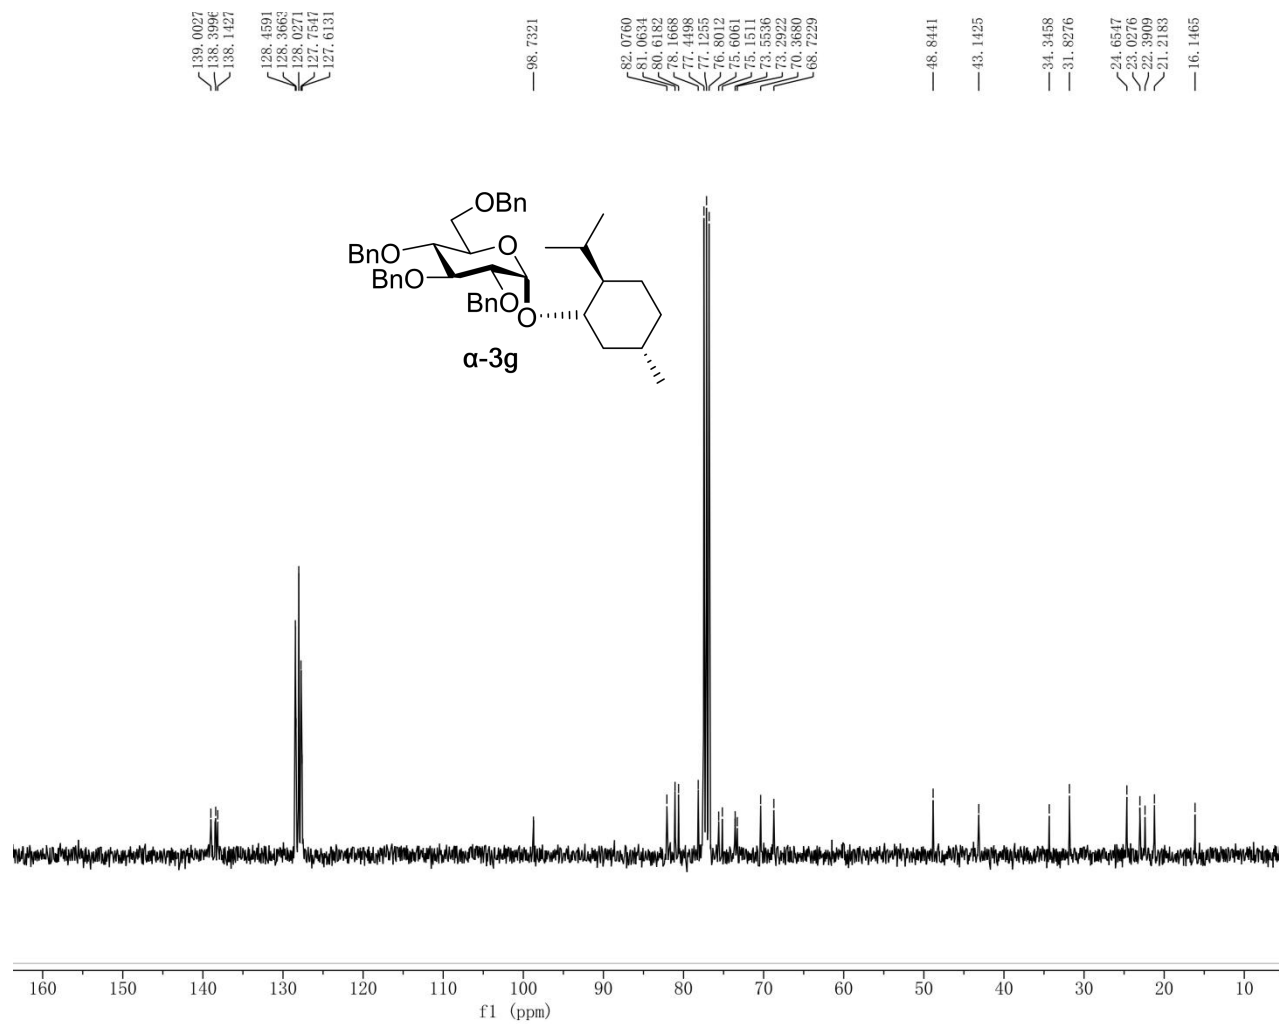

Figure S32.  $^{13}\text{C}$  NMR (400 MHz,  $\text{CDCl}_3$ ) spectrum of  $\alpha$ -3g

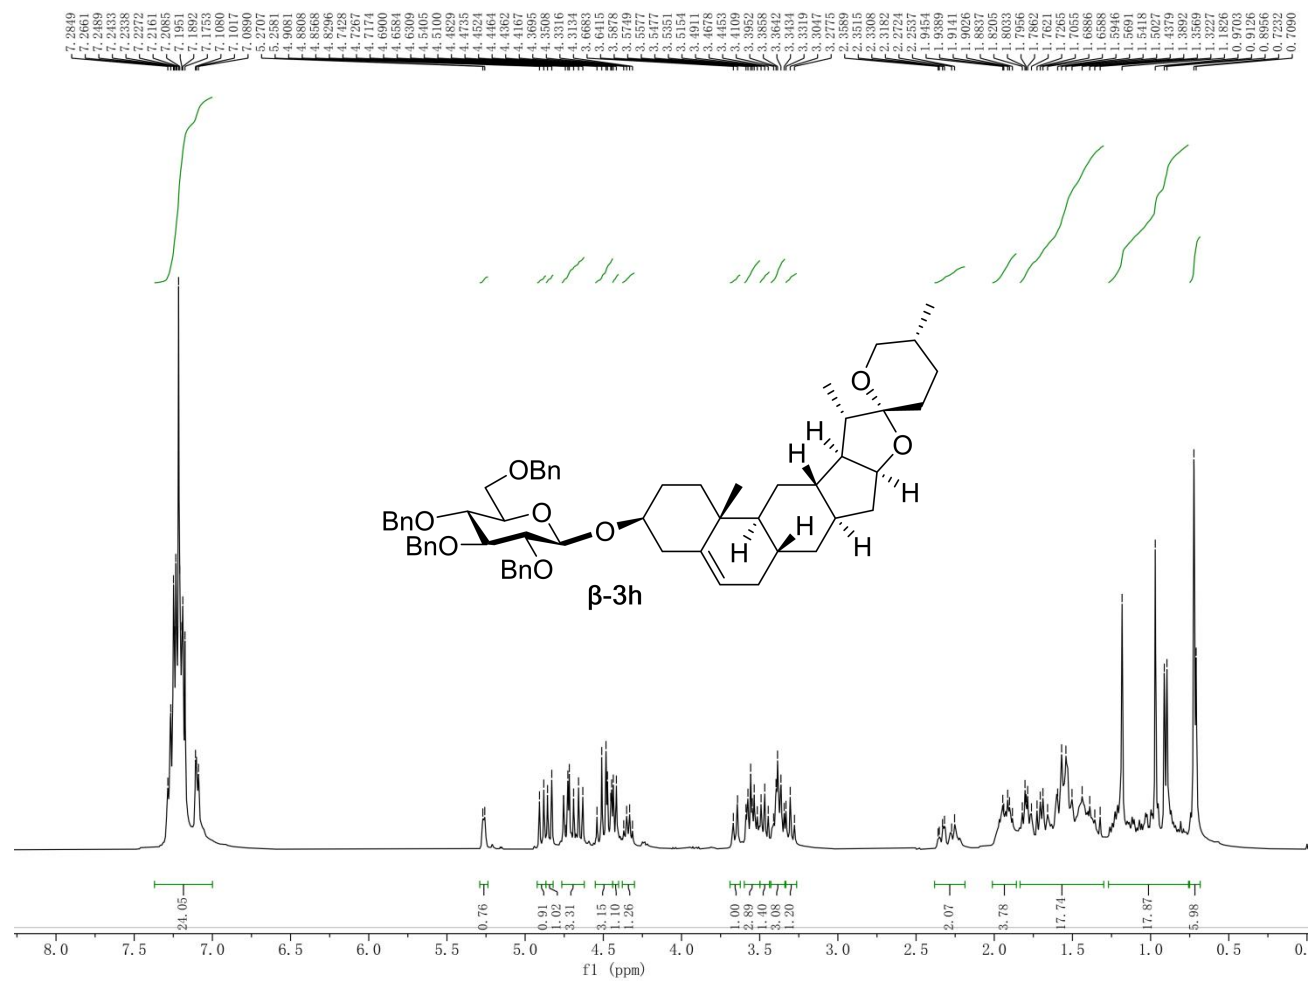

Figure S33.  $^1\text{H NMR}$  (400 MHz,  $\text{CDCl}_3$ ) spectrum of  $\beta$ -3h

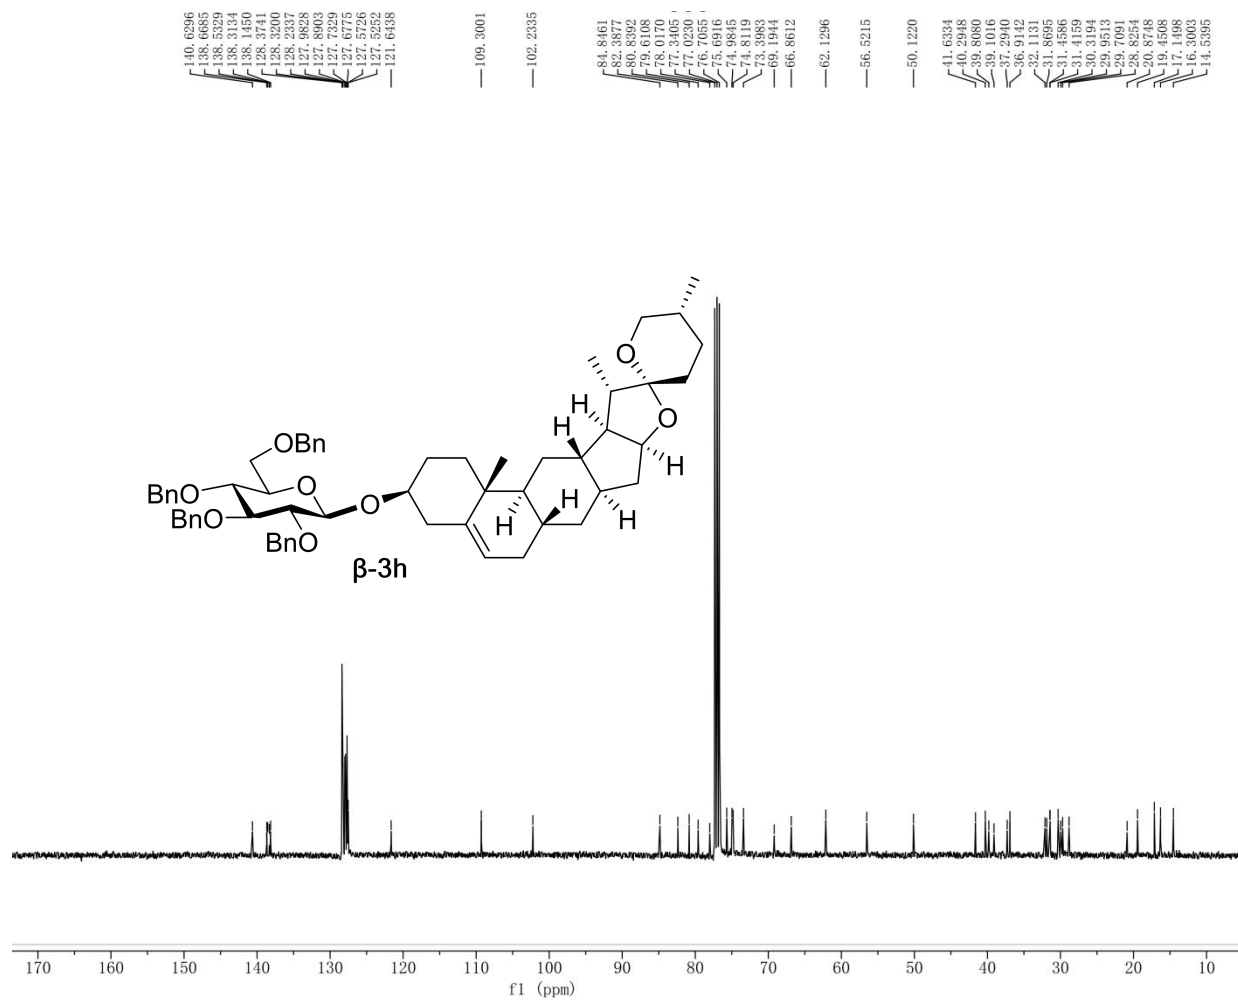

Figure S34.  $^{13}\text{C}$  NMR (400 MHz,  $\text{CDCl}_3$ ) spectrum of  $\beta$ -3h

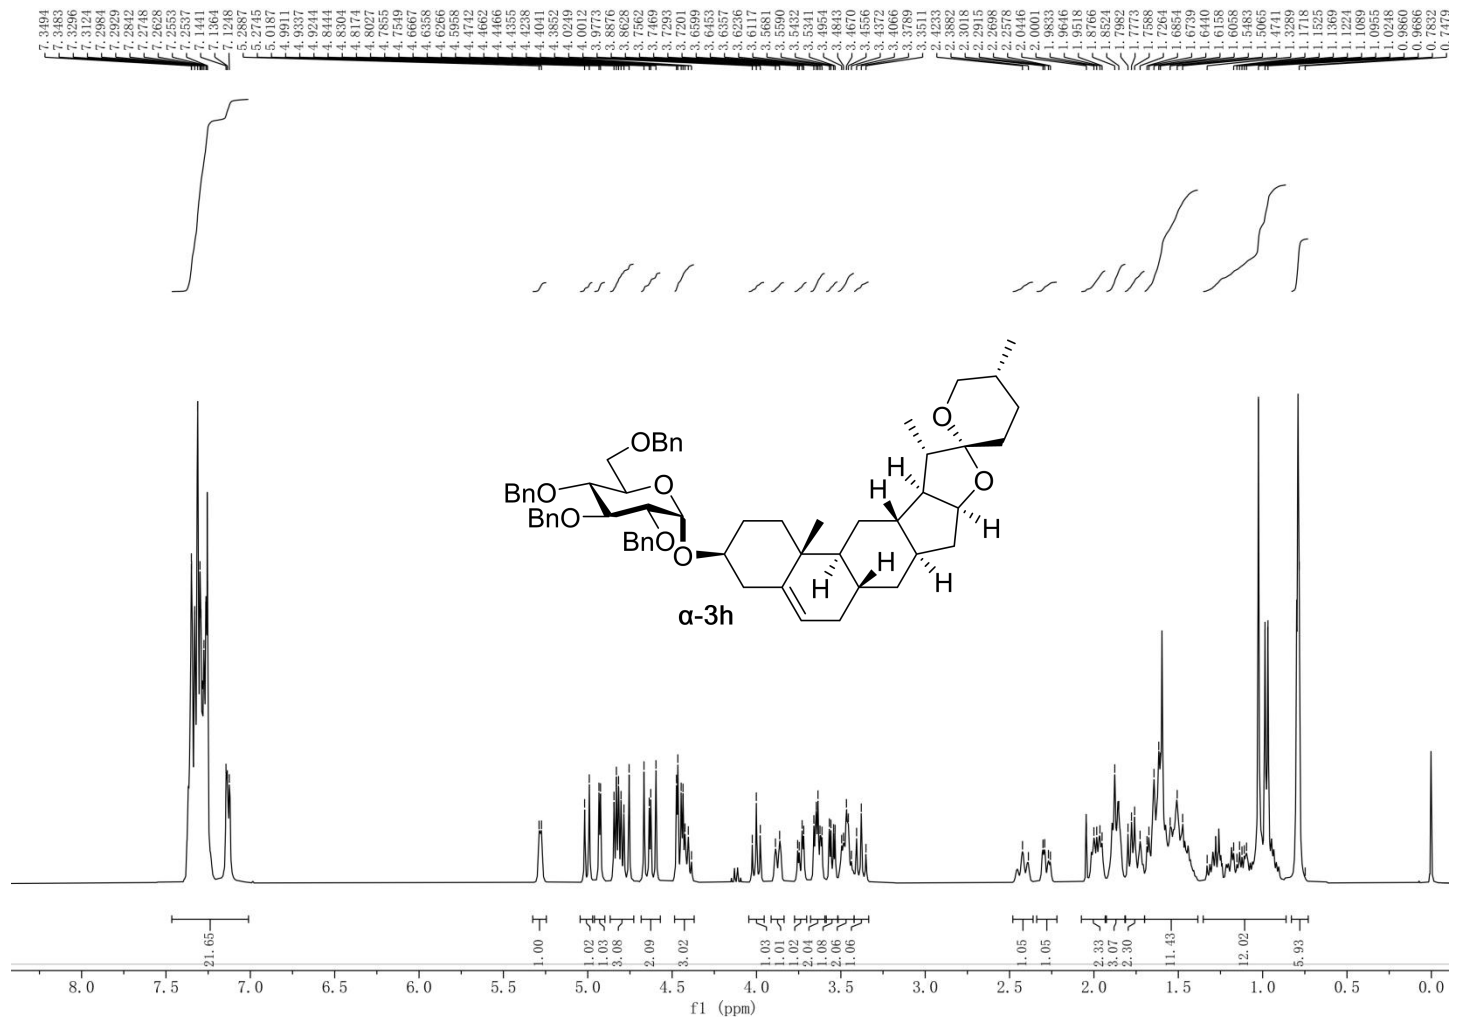

Figure S35.  $^1\text{H NMR}$  (400 MHz,  $\text{CDCl}_3$ ) spectrum of  $\alpha$ -3h

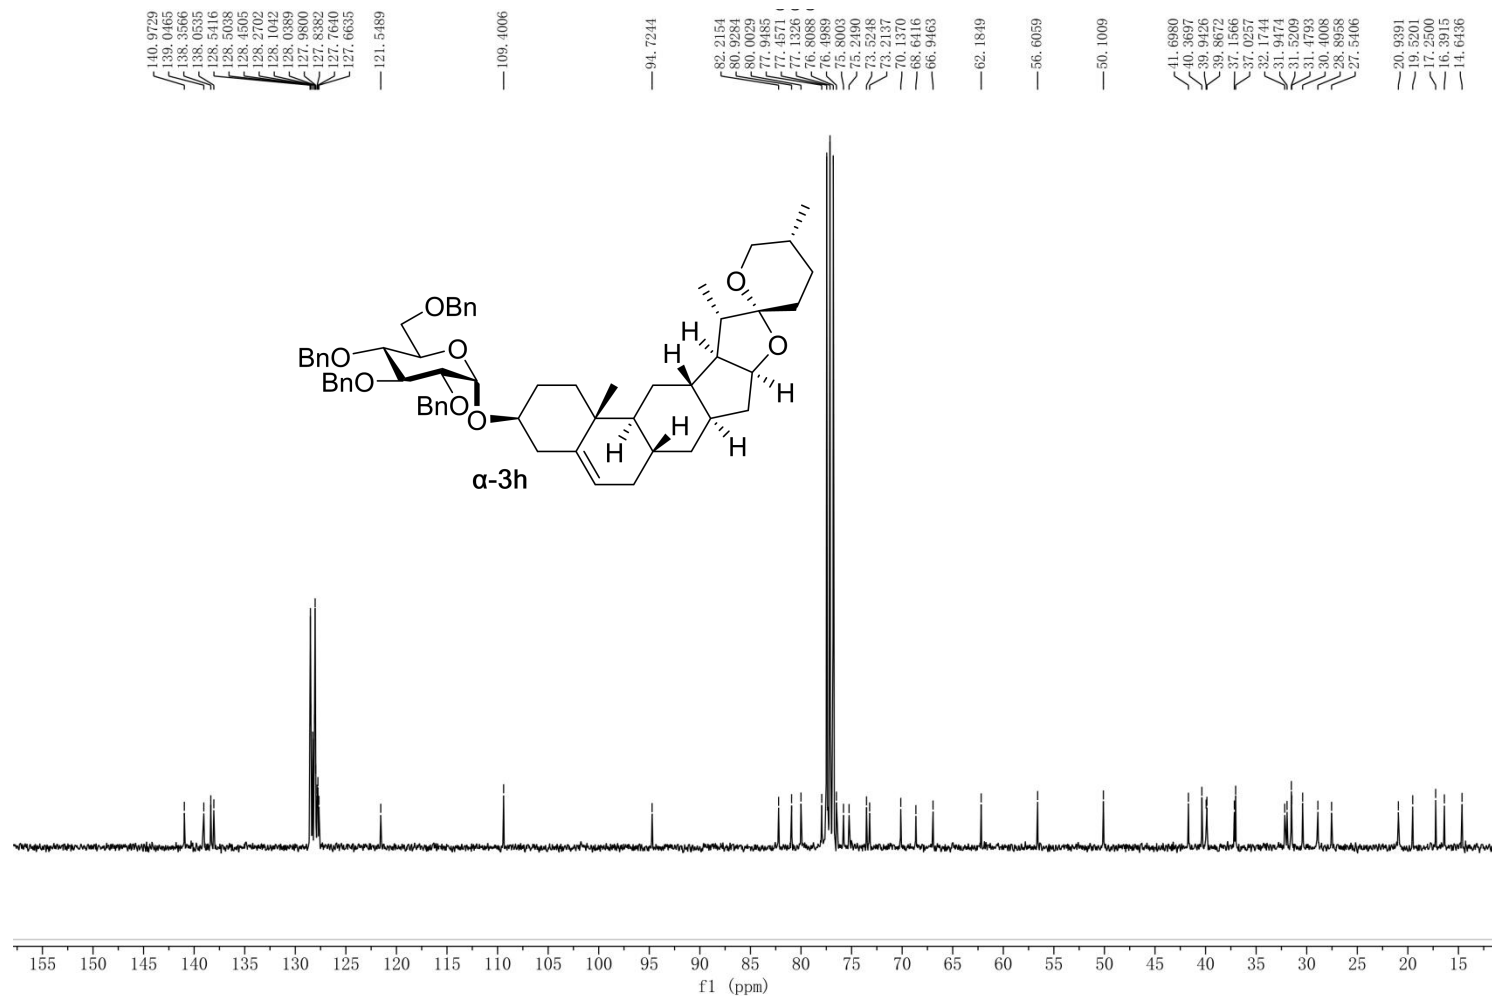

Figure S36.  $^{13}\text{C}$  NMR (400 MHz,  $\text{CDCl}_3$ ) spectrum of  $\alpha$ -3h

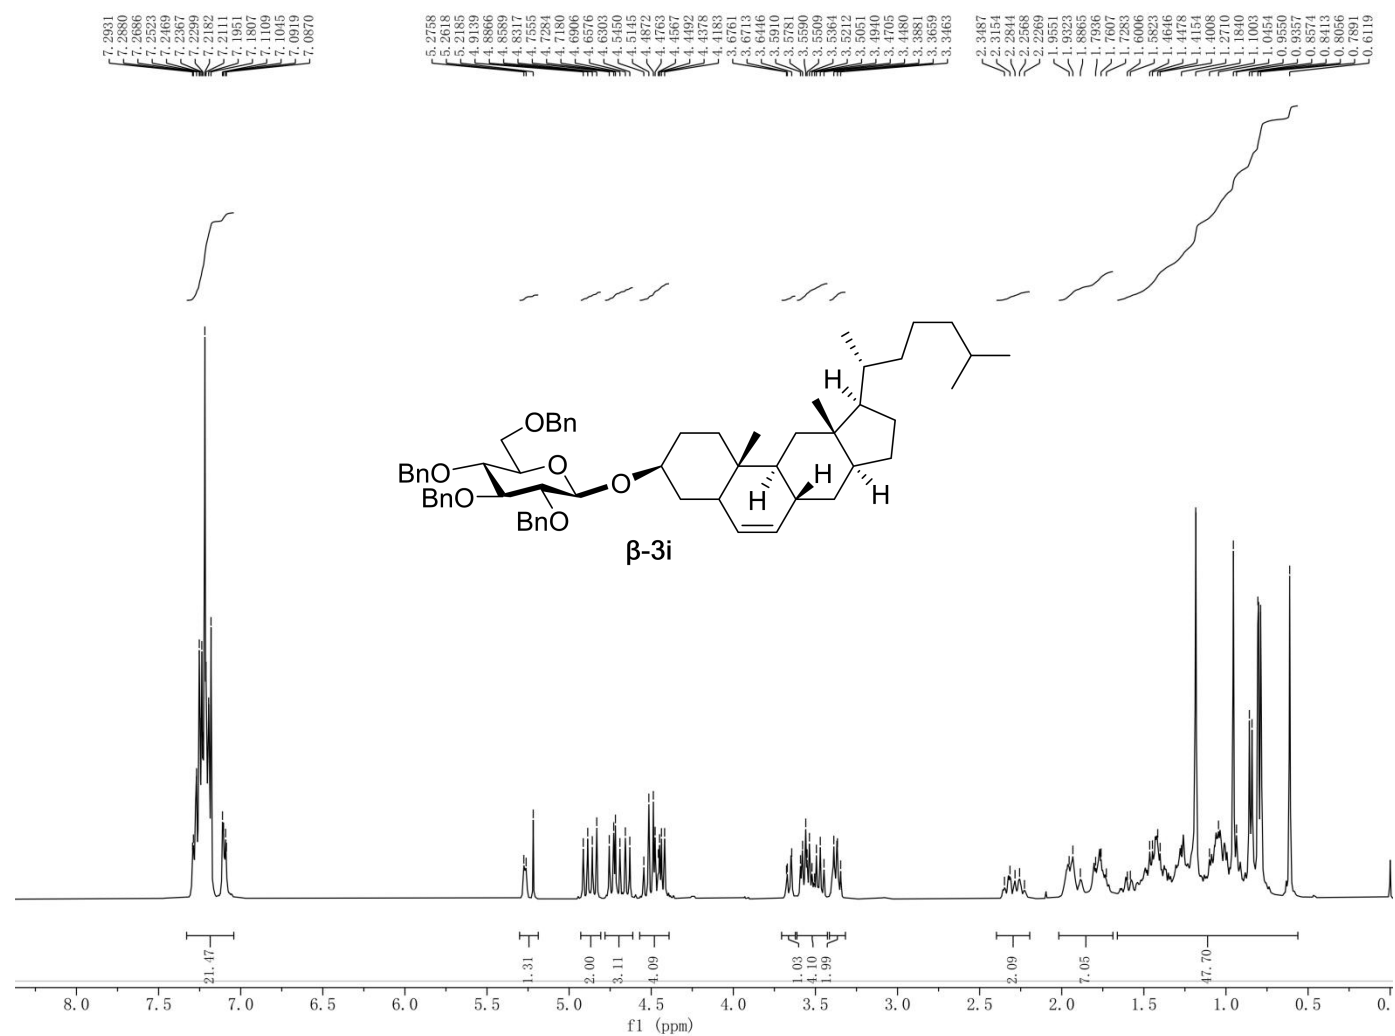

Figure S37.  $^1\text{H}$  NMR (400 MHz,  $\text{CDCl}_3$ ) spectrum of

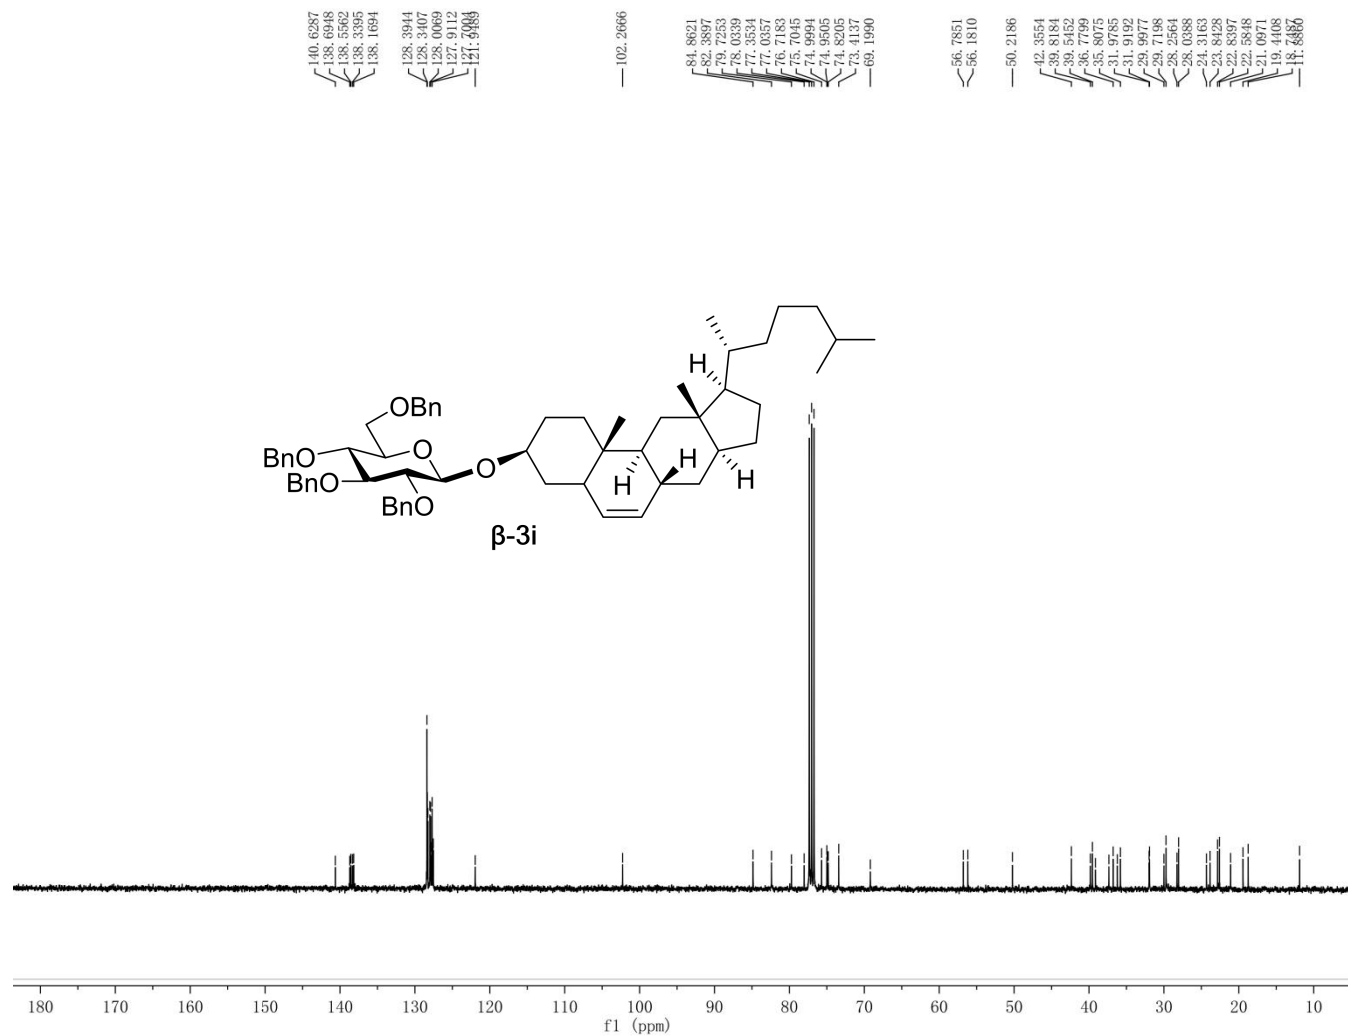

Figure S38.  $^{13}\text{C}$  NMR (400 MHz,  $\text{CDCl}_3$ ) spectrum of  $\beta$ -3i



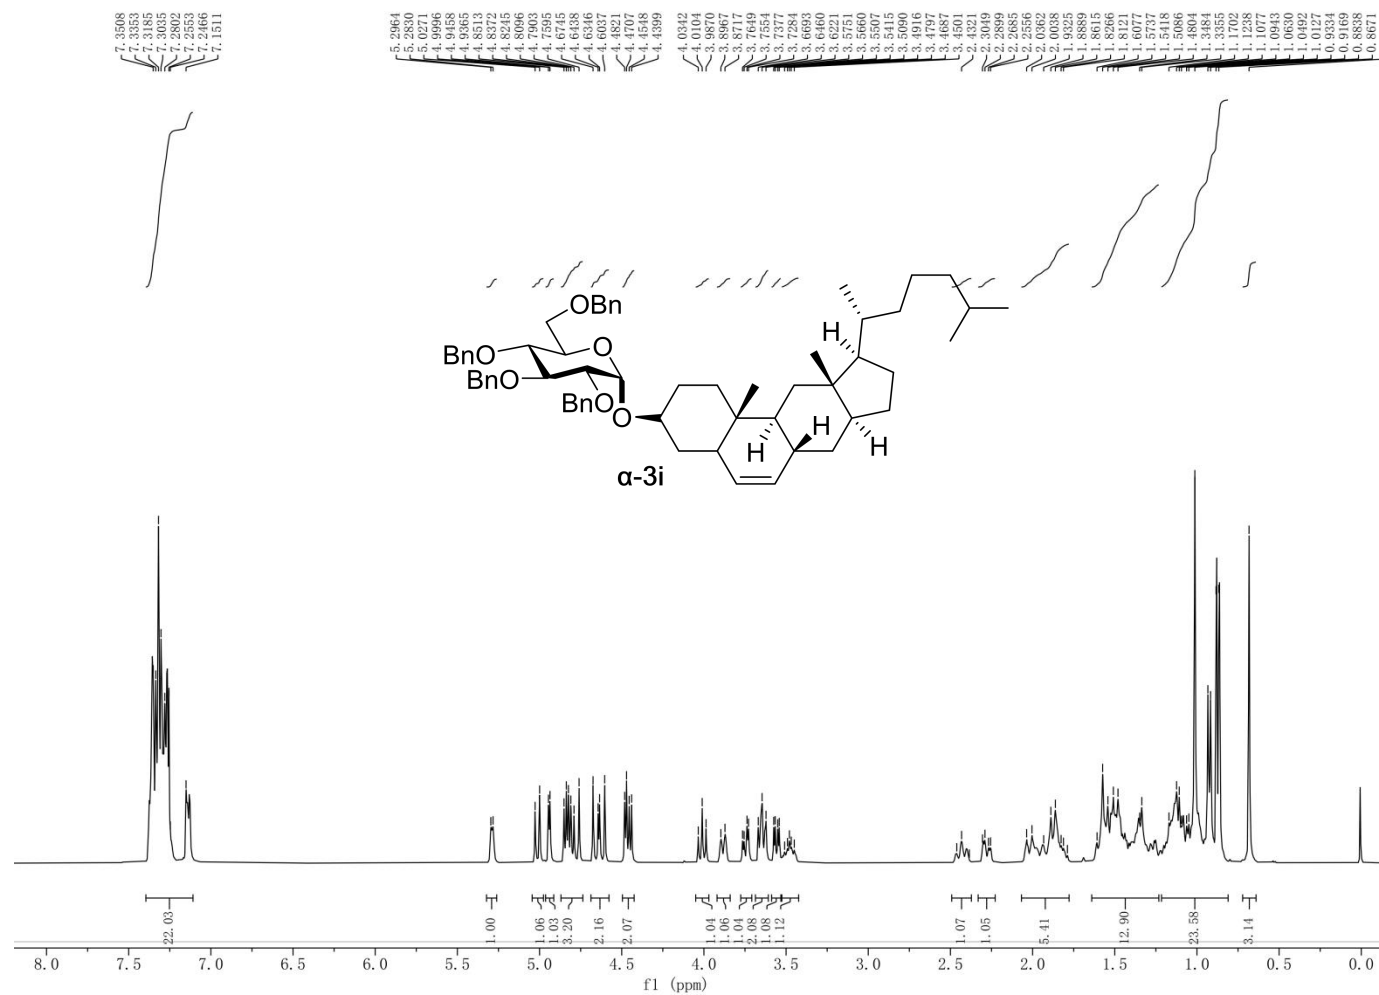

Figure S39.  $^1\text{H}$  NMR (400 MHz,  $\text{CDCl}_3$ ) spectrum of  $\alpha$ -3i

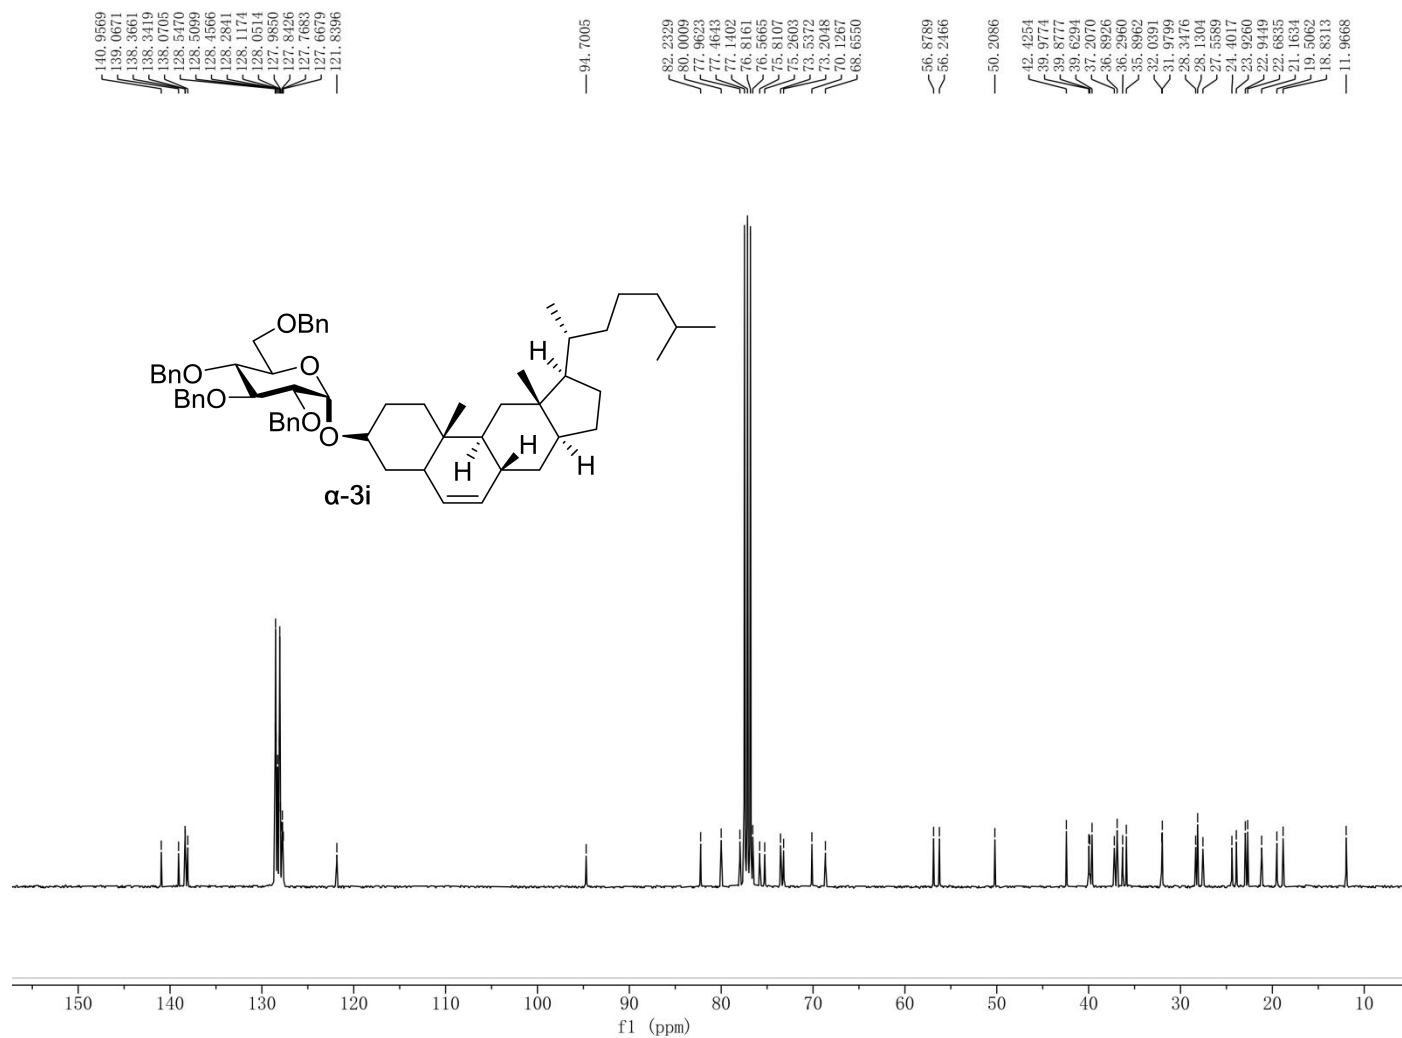

Figure S40.  $^{13}\text{C}$  NMR (400 MHz,  $\text{CDCl}_3$ ) spectrum of  $\alpha$ -3i

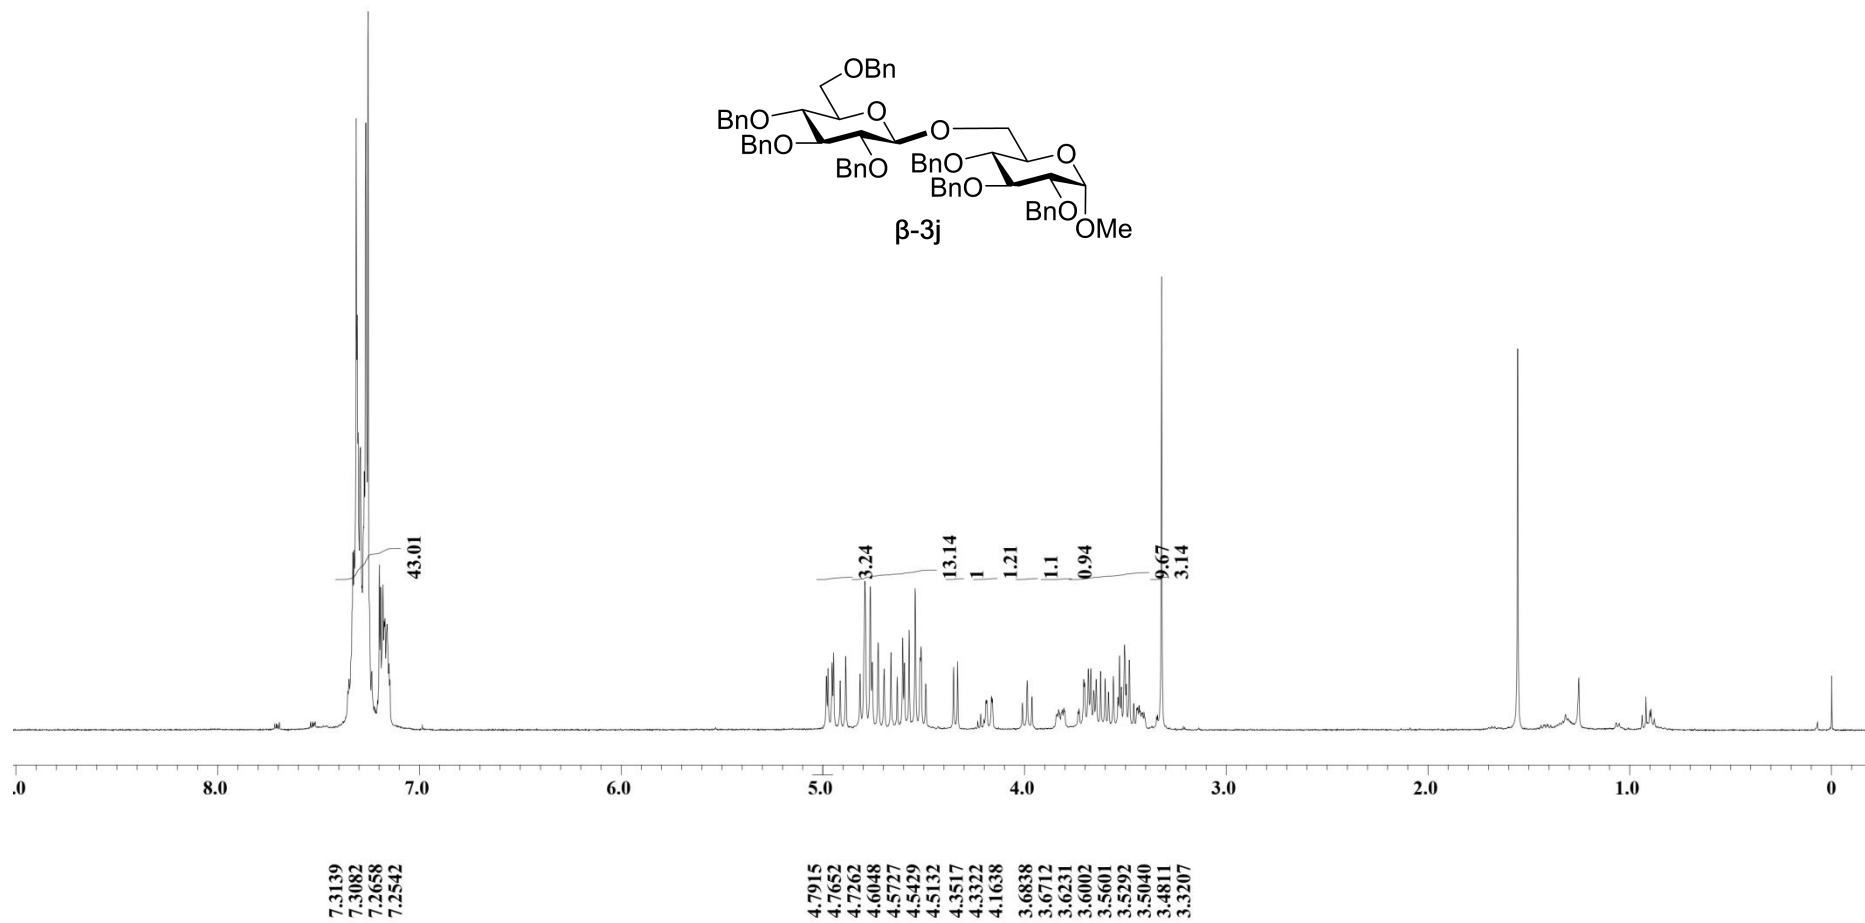

Figure S41. <sup>1</sup>H NMR (400 MHz, CDCl<sub>3</sub>) spectrum of **β-3j**

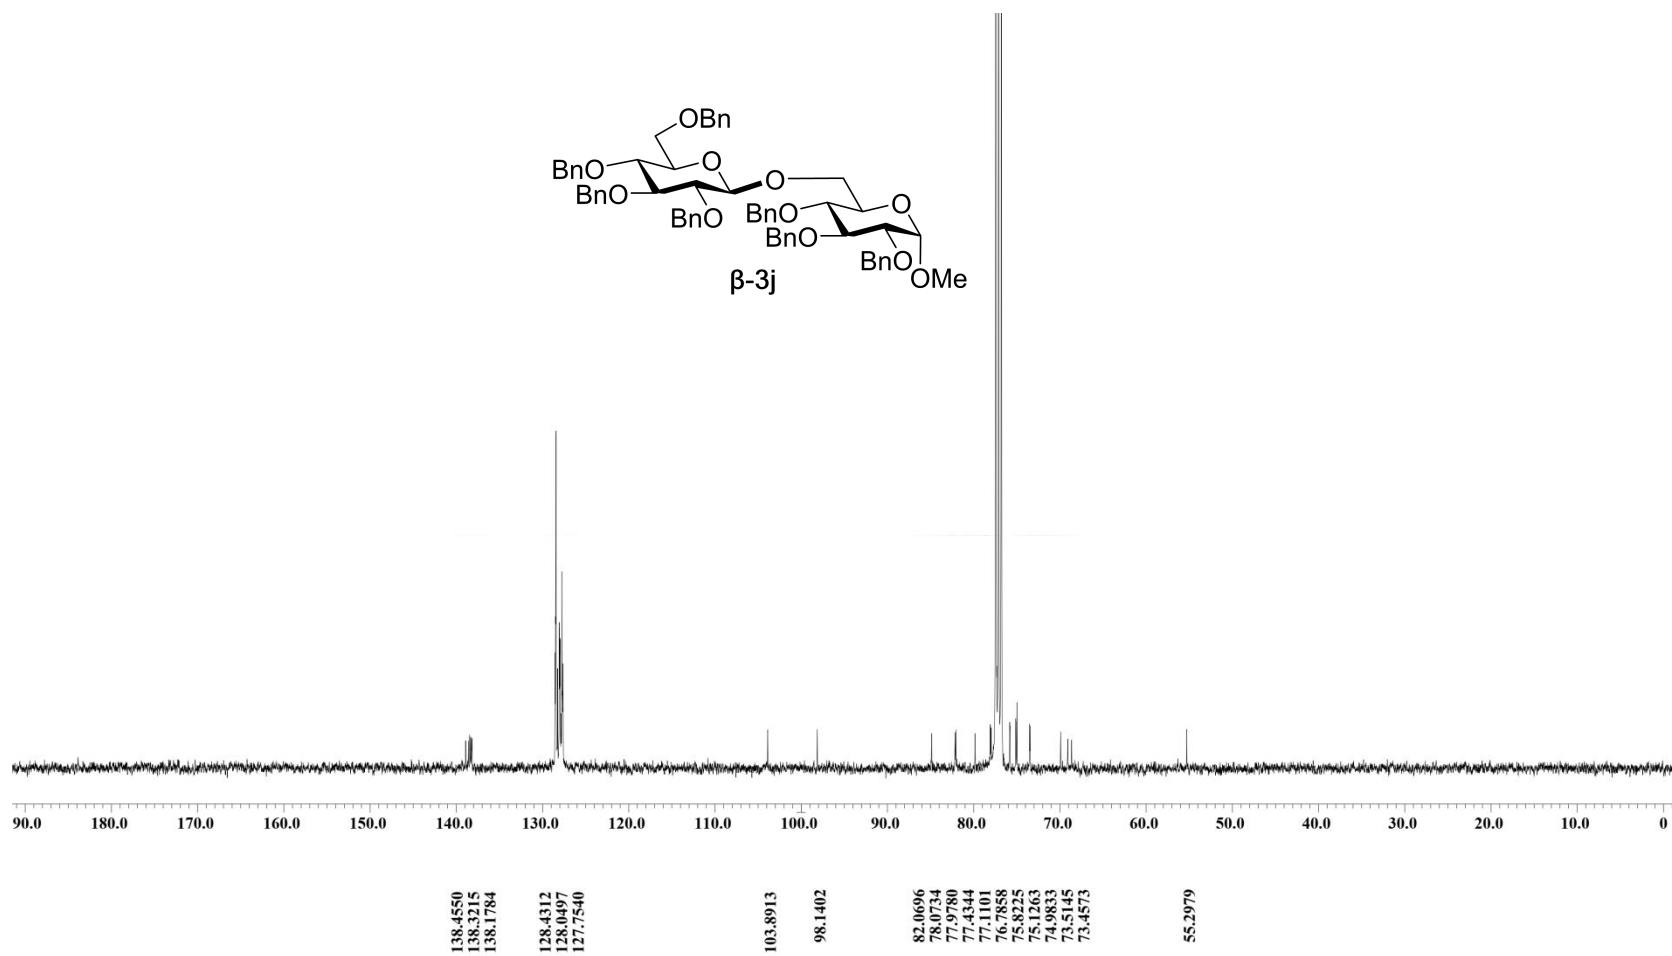

Figure S42. <sup>13</sup>C NMR (400 MHz, CDCl<sub>3</sub>) spectrum of **β-3j**

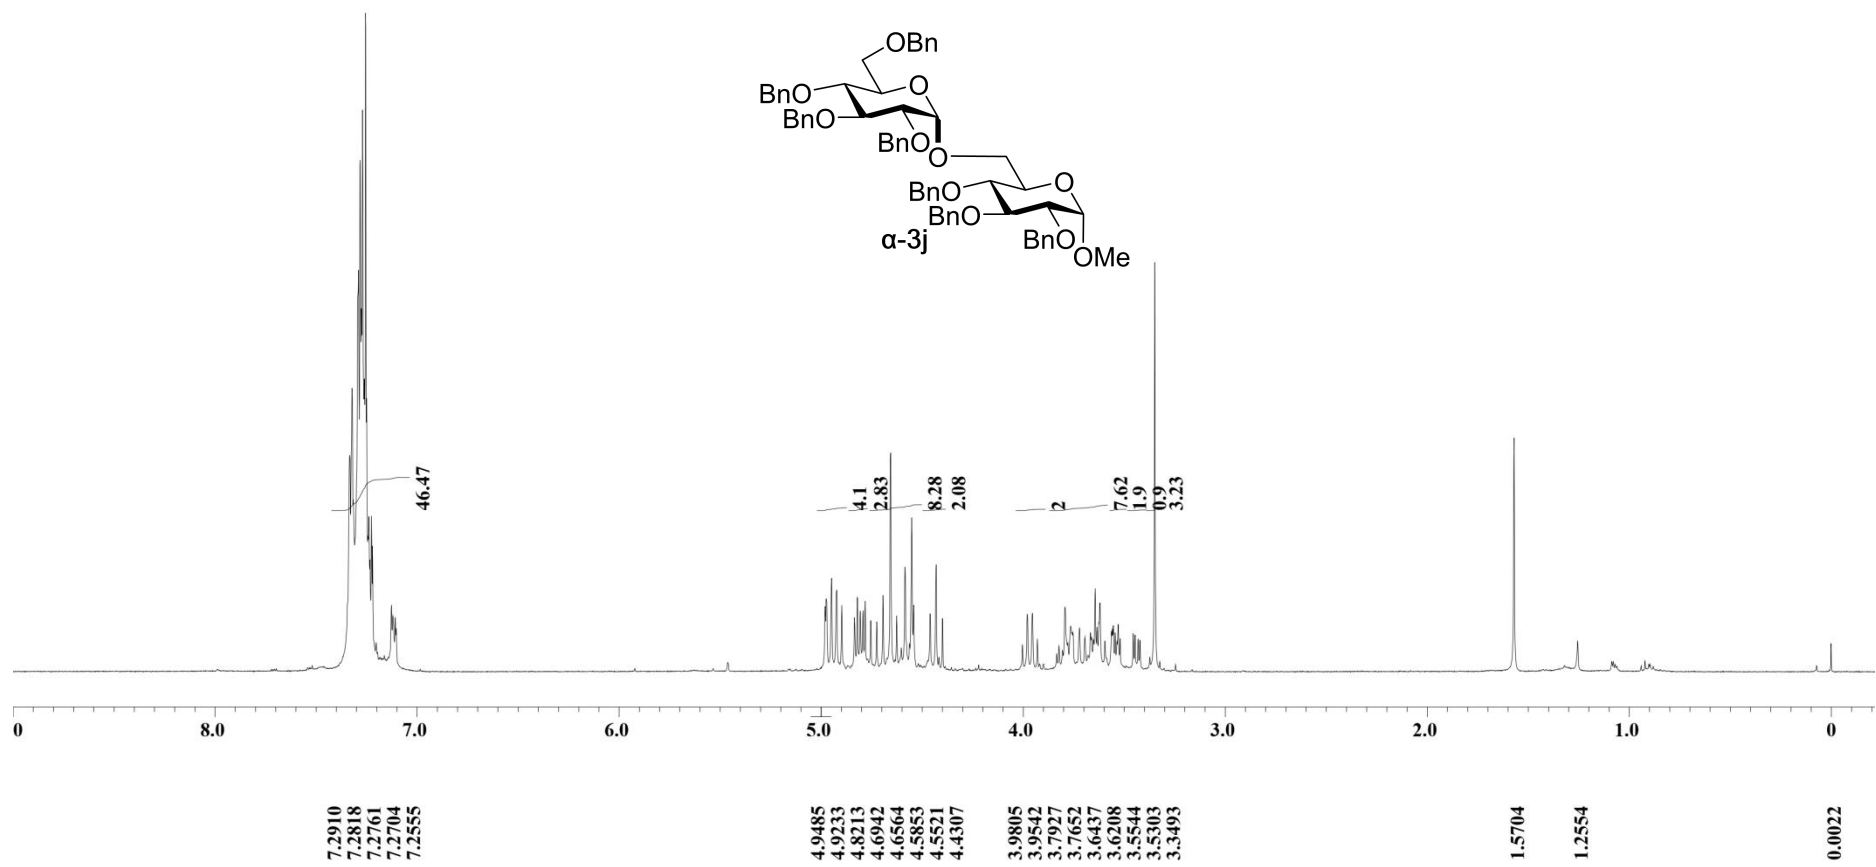

**Figure S43.** <sup>1</sup>H NMR (400 MHz, CDCl<sub>3</sub>) spectrum of **α-3j**

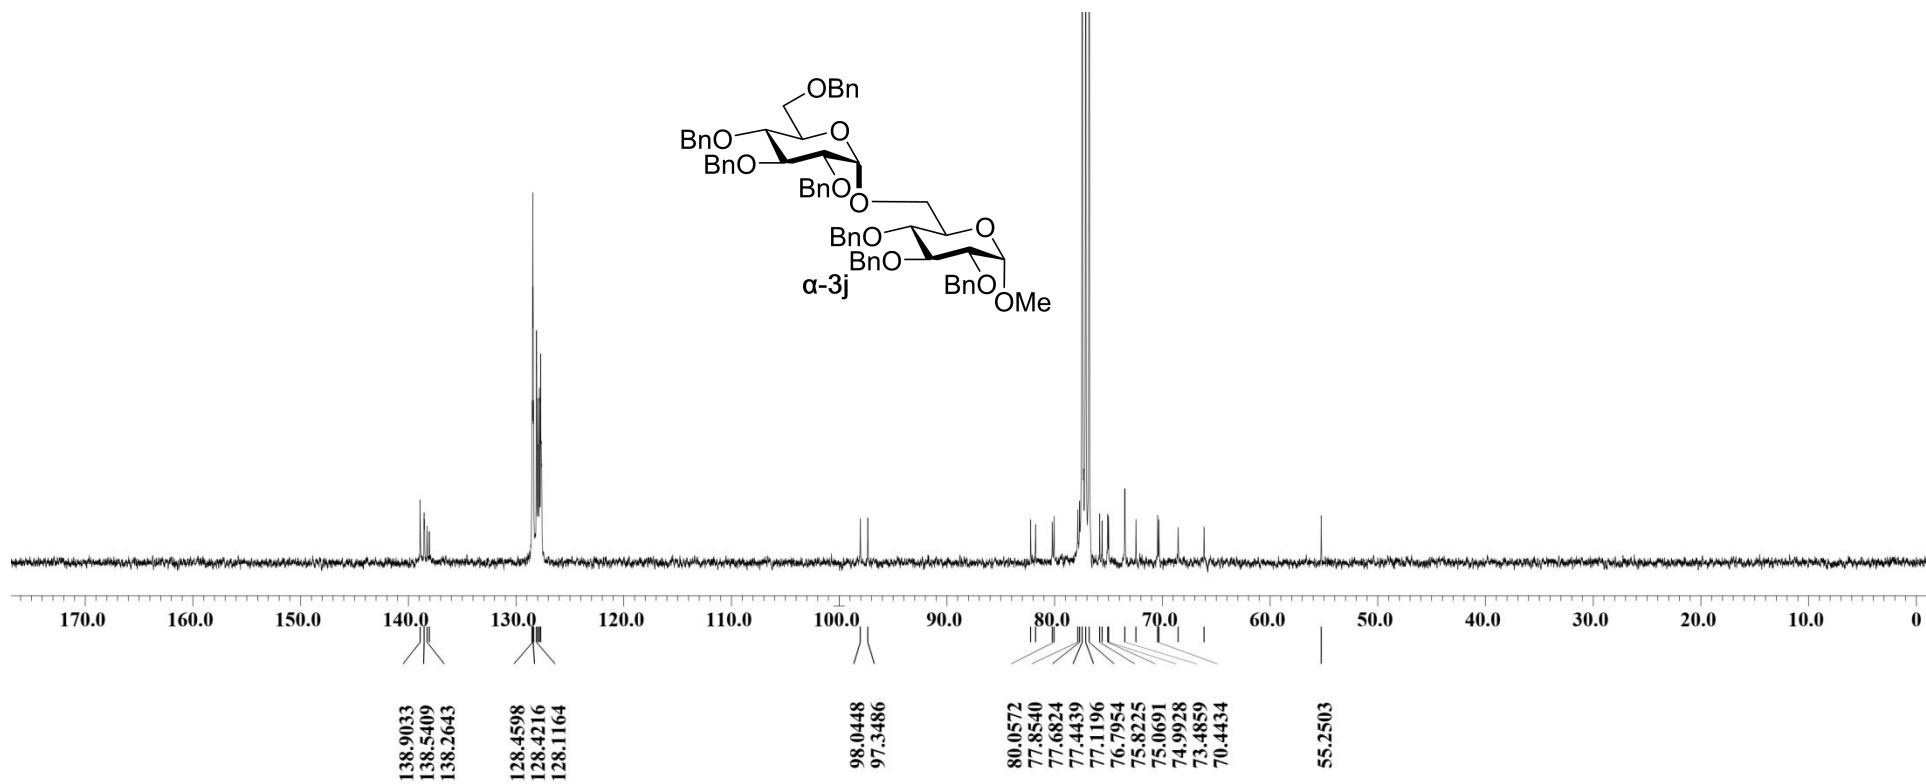

Figure S44. <sup>13</sup>C NMR (400 MHz, CDCl<sub>3</sub>) spectrum of **α-3j**

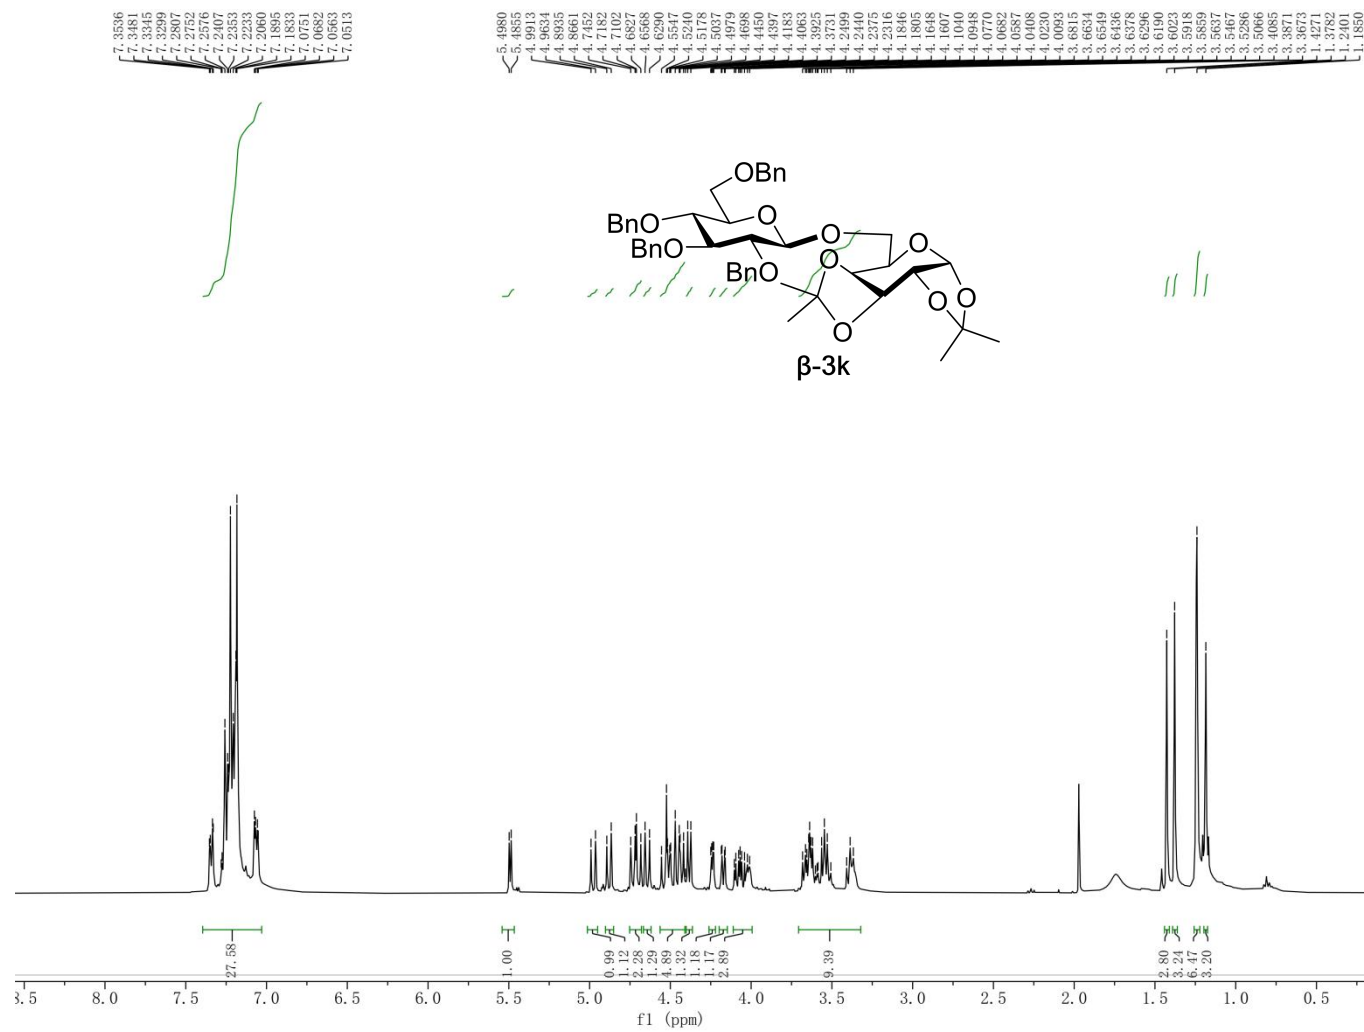

Figure S45. <sup>1</sup>H NMR (400 MHz, CDCl<sub>3</sub>) spectrum of β-3k

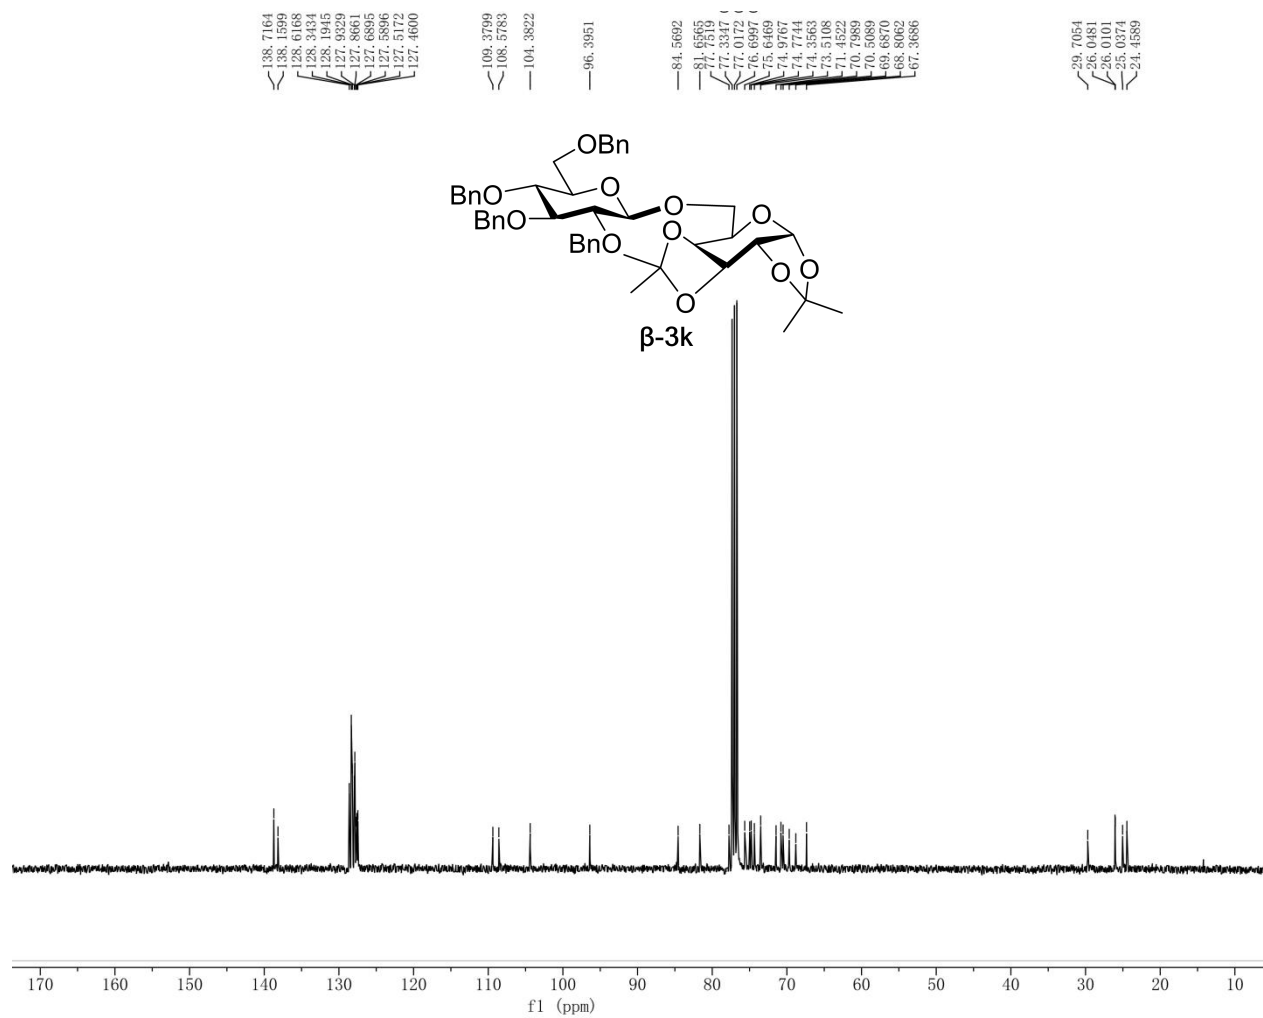

Figure S46.  $^{13}\text{C}$  NMR (400 MHz,  $\text{CDCl}_3$ ) spectrum of  $\beta$ -3k



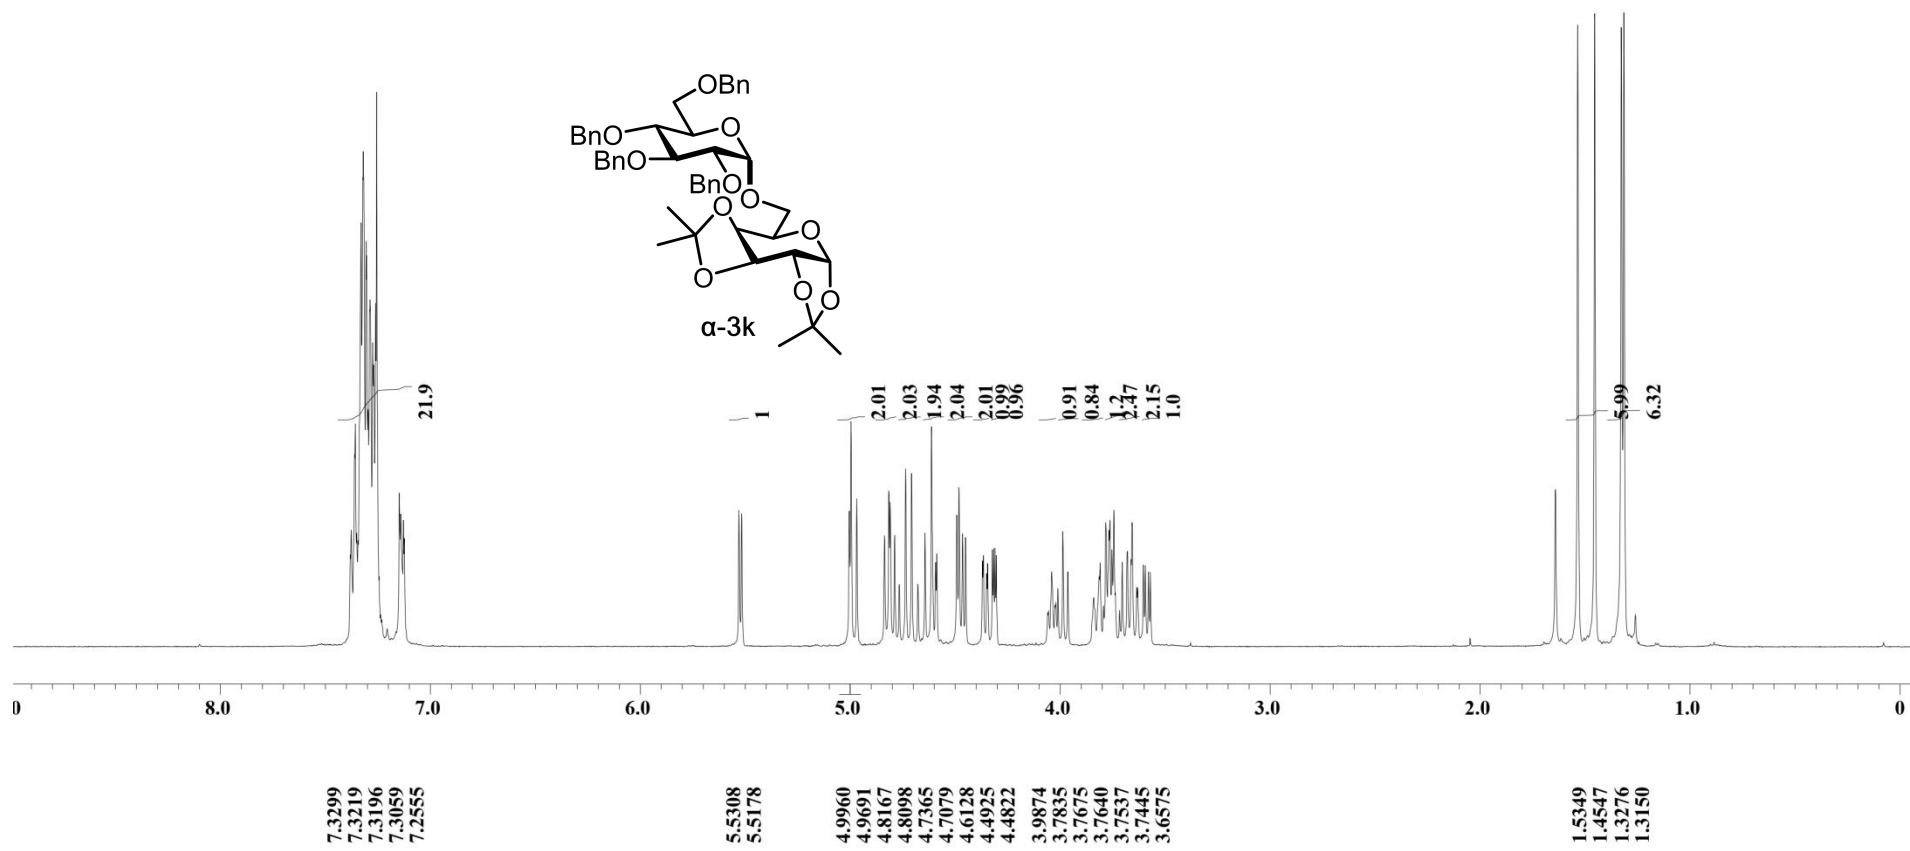

Figure S47.  $^1\text{H}$  NMR (400 MHz,  $\text{CDCl}_3$ ) spectrum of  $\alpha$ -3k

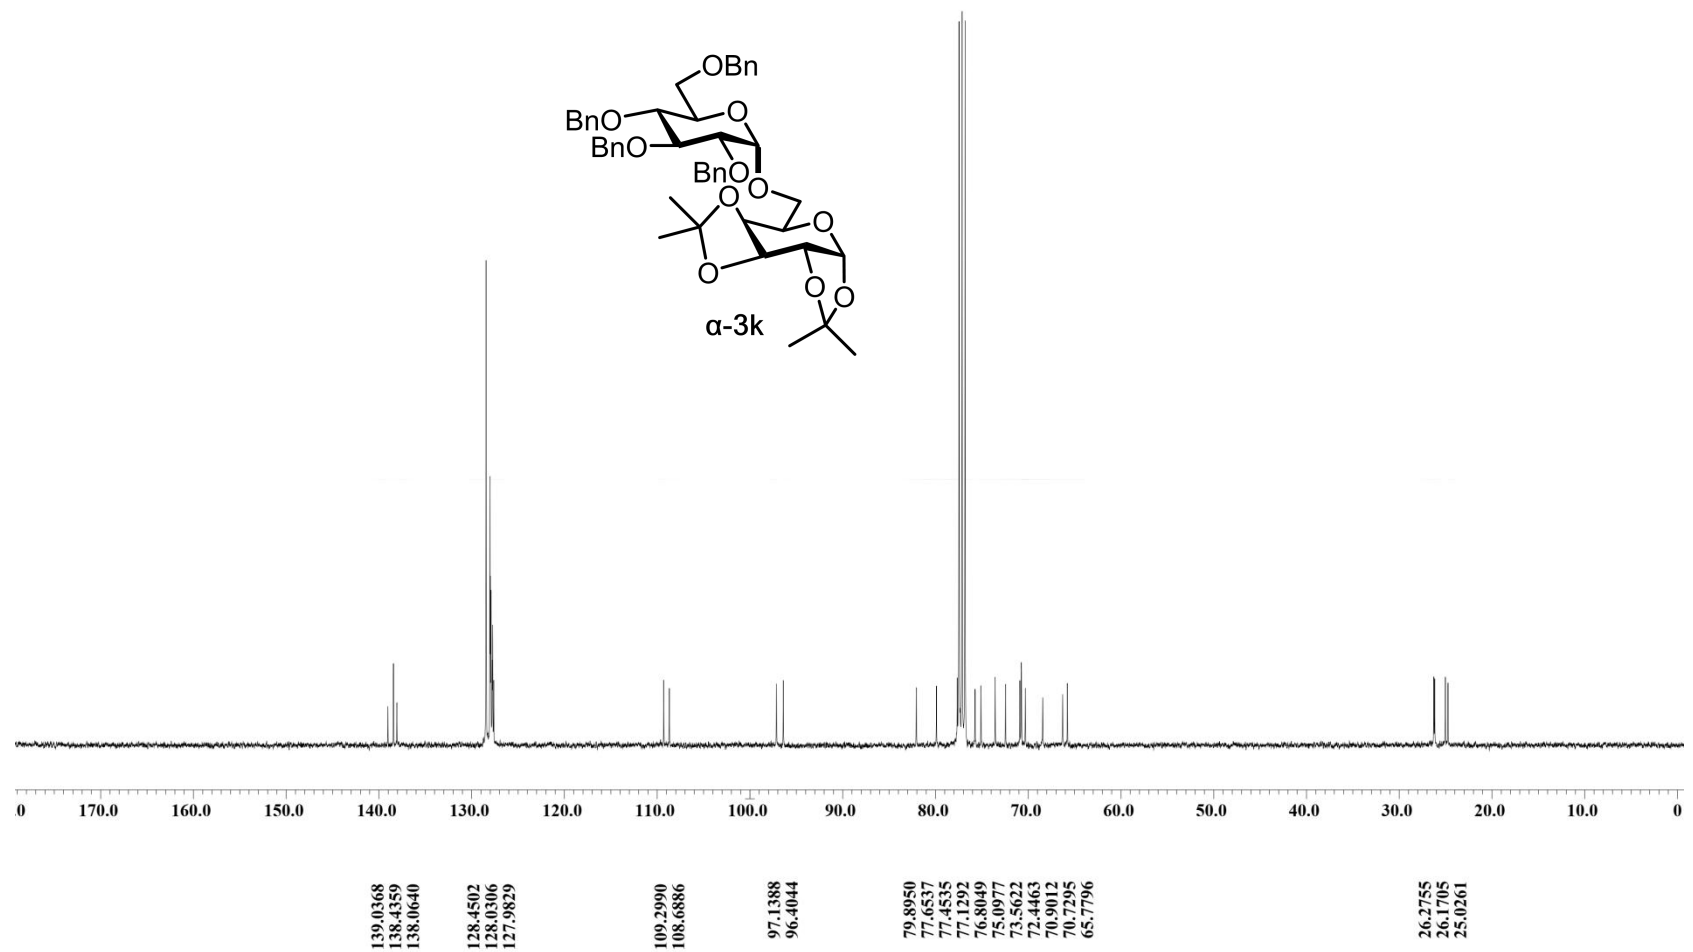

Figure S48.  $^{13}\text{C}$  NMR (400 MHz,  $\text{CDCl}_3$ ) spectrum of  $\alpha$ -3k

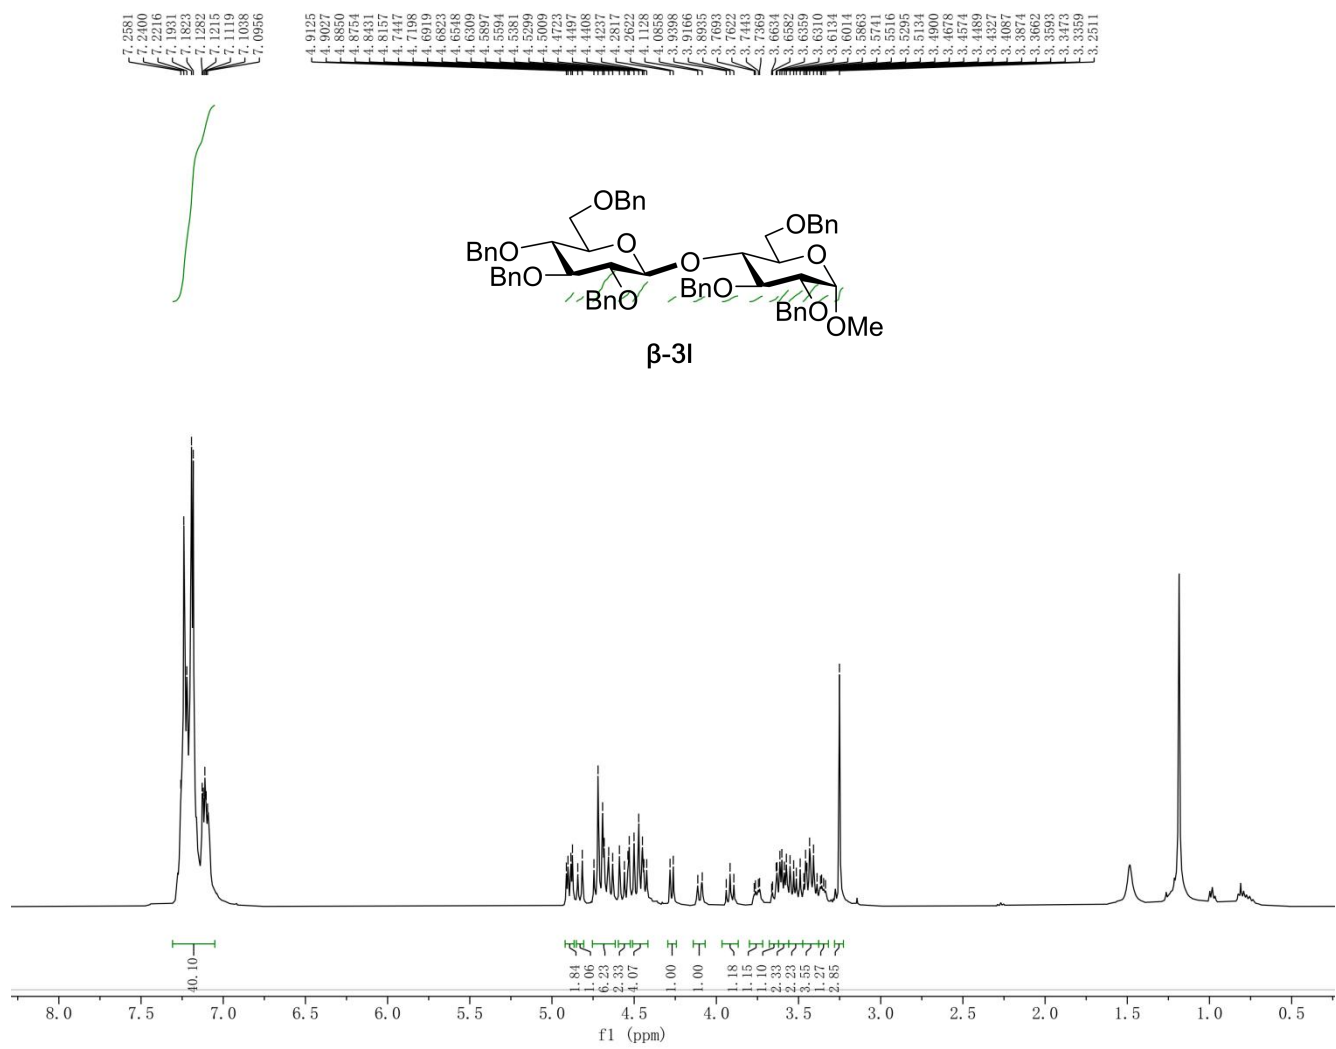

**Figure S49.** <sup>1</sup>H NMR (400 MHz, CDCl<sub>3</sub>) spectrum of **β-3I**

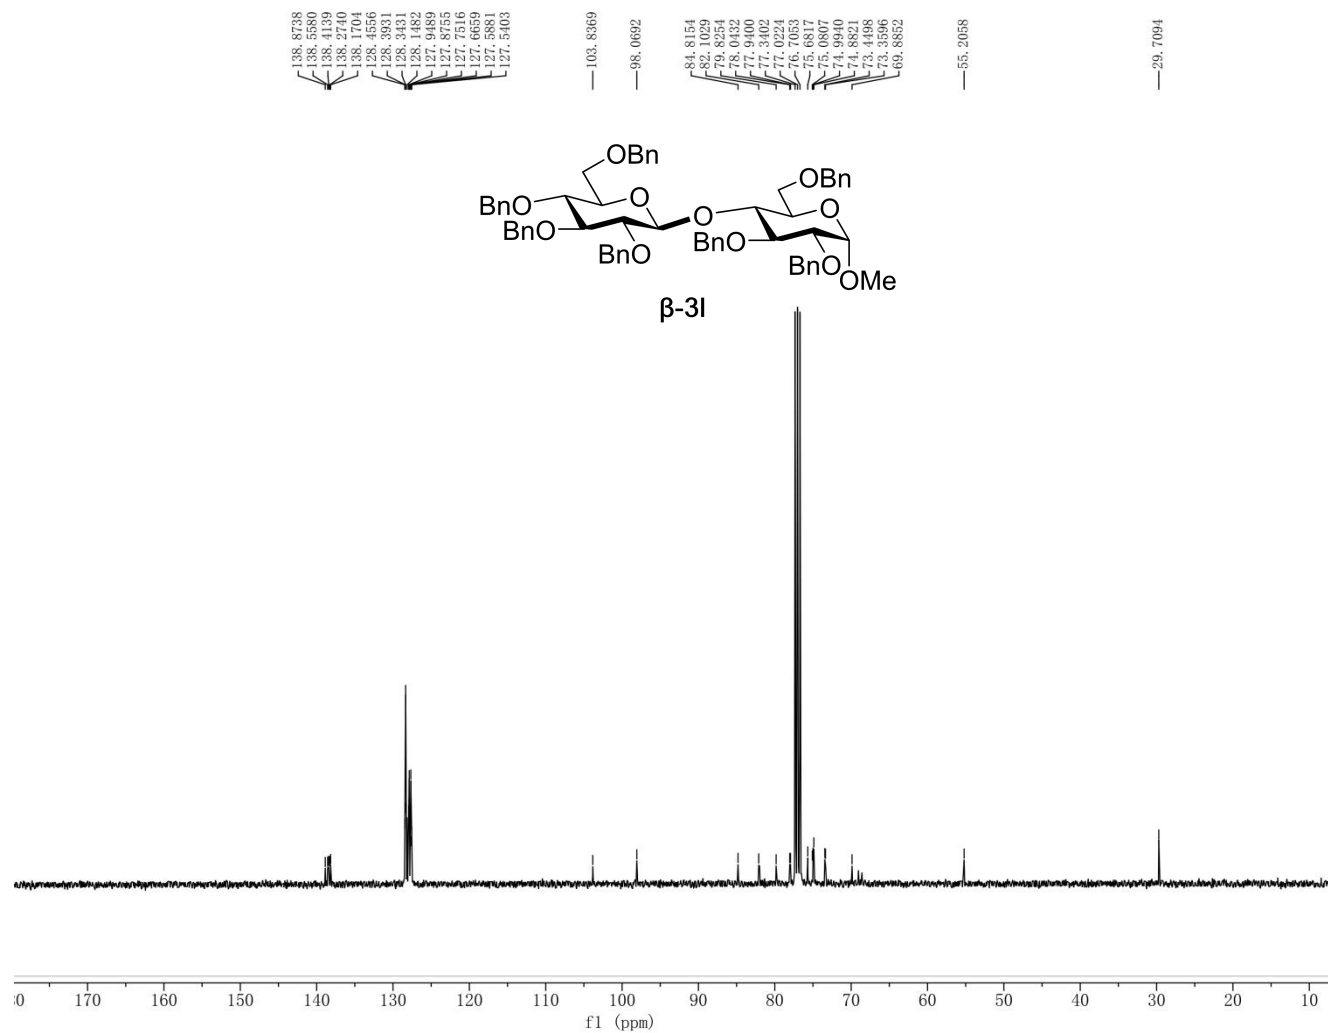

Figure S50.  $^{13}\text{C}$  NMR (400 MHz,  $\text{CDCl}_3$ ) spectrum of  $\beta$ -3I



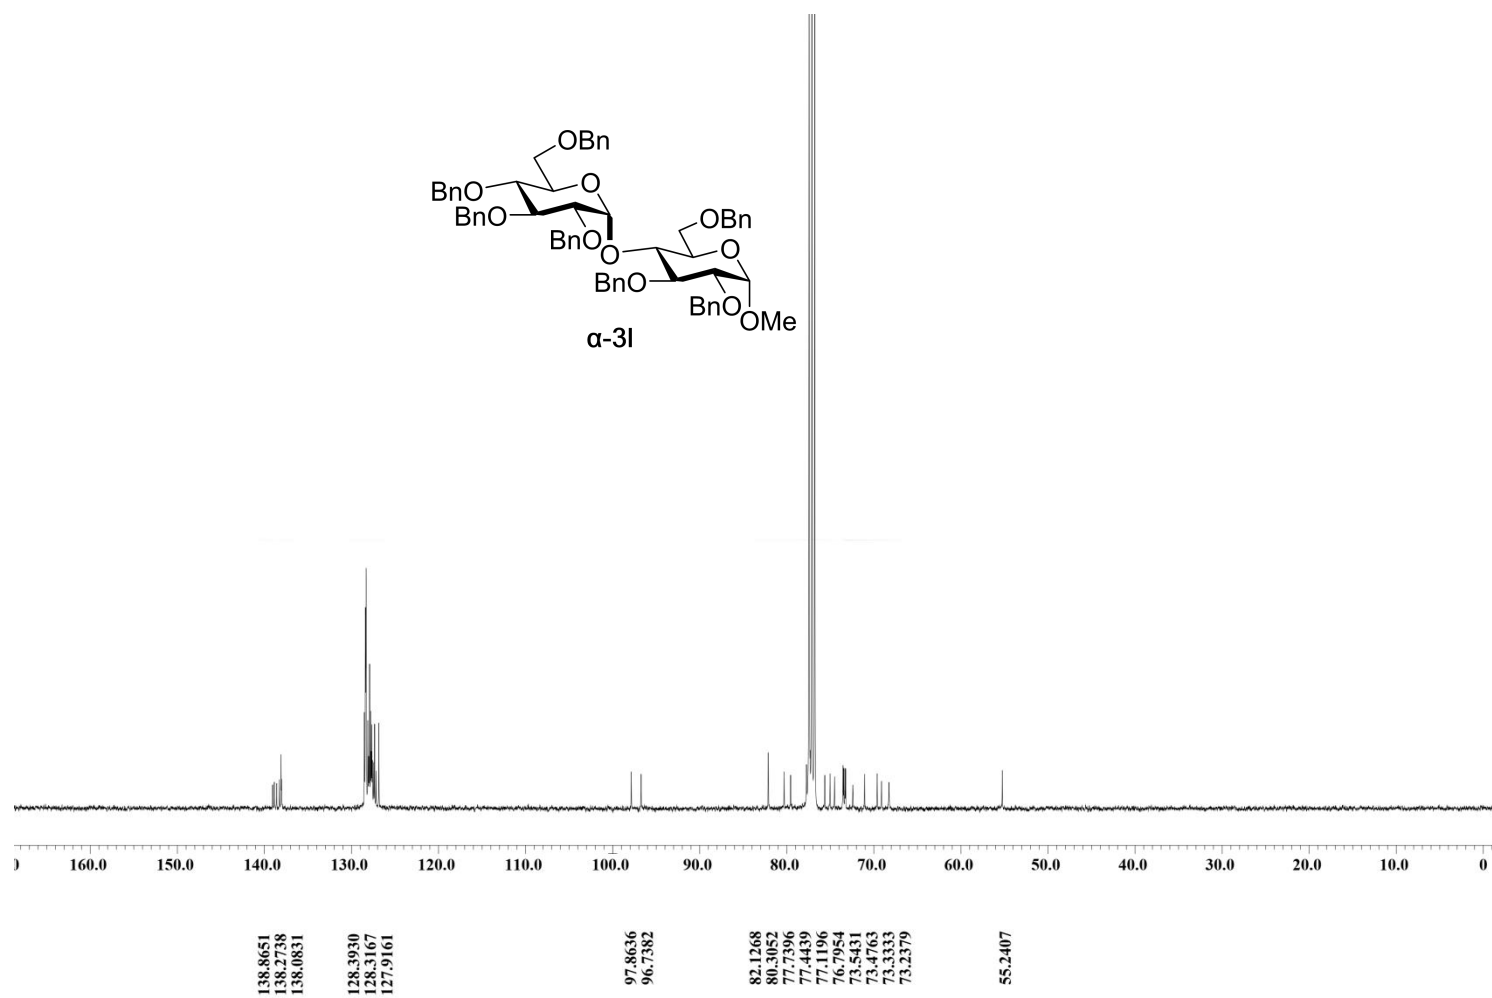

Figure S52. <sup>13</sup>C NMR (400 MHz, CDCl<sub>3</sub>) spectrum of  $\alpha$ -3I

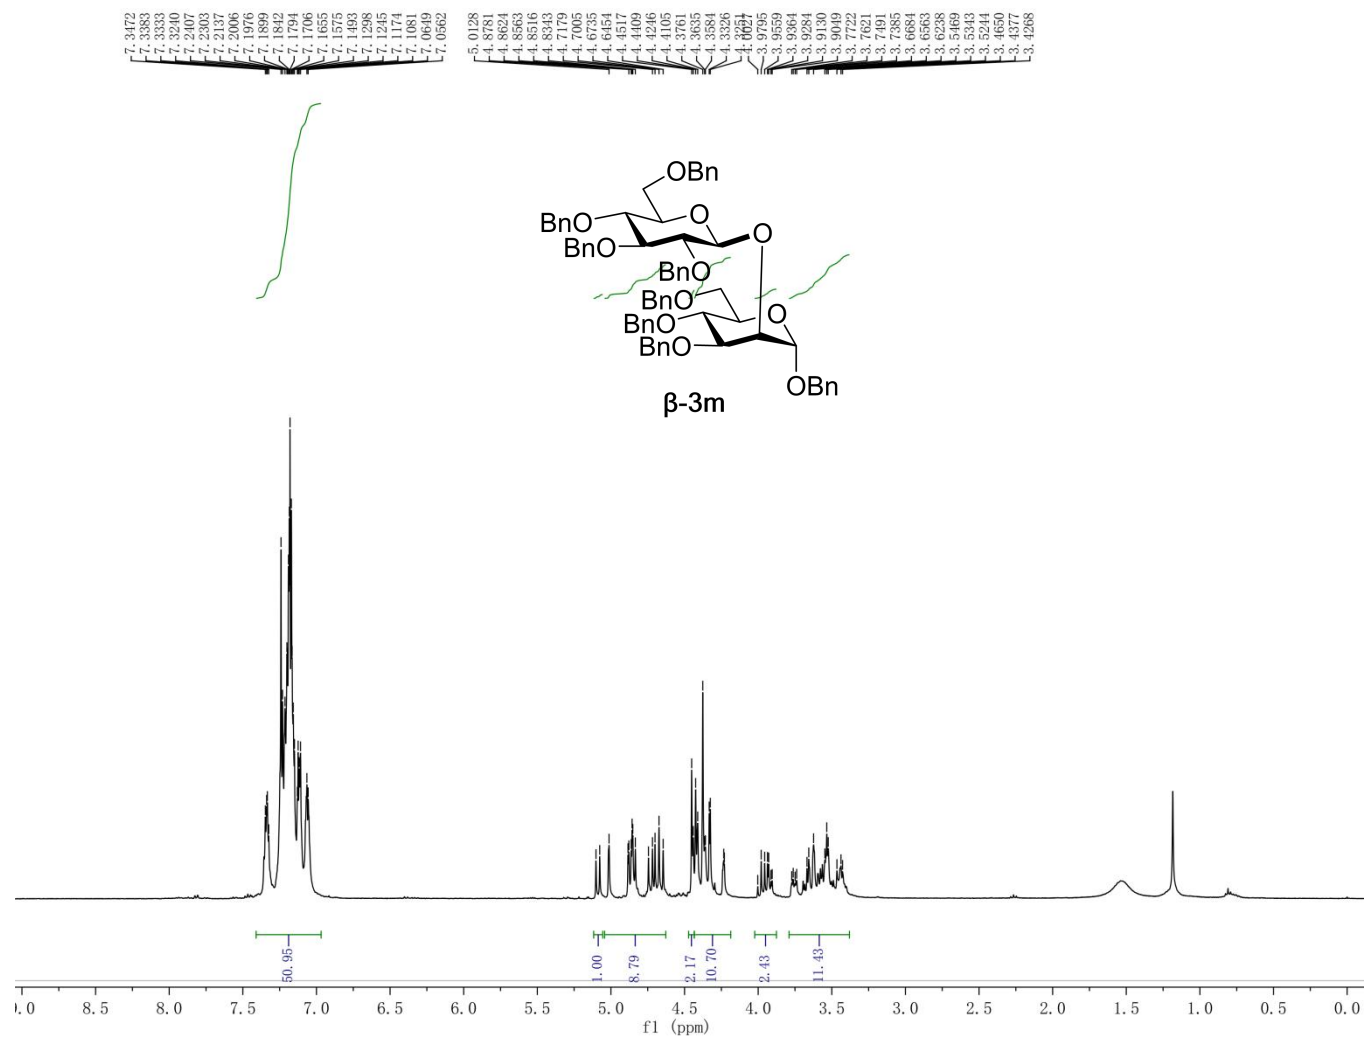

**Figure S53.** <sup>1</sup>H NMR (400 MHz, CDCl<sub>3</sub>) spectrum of β-3m

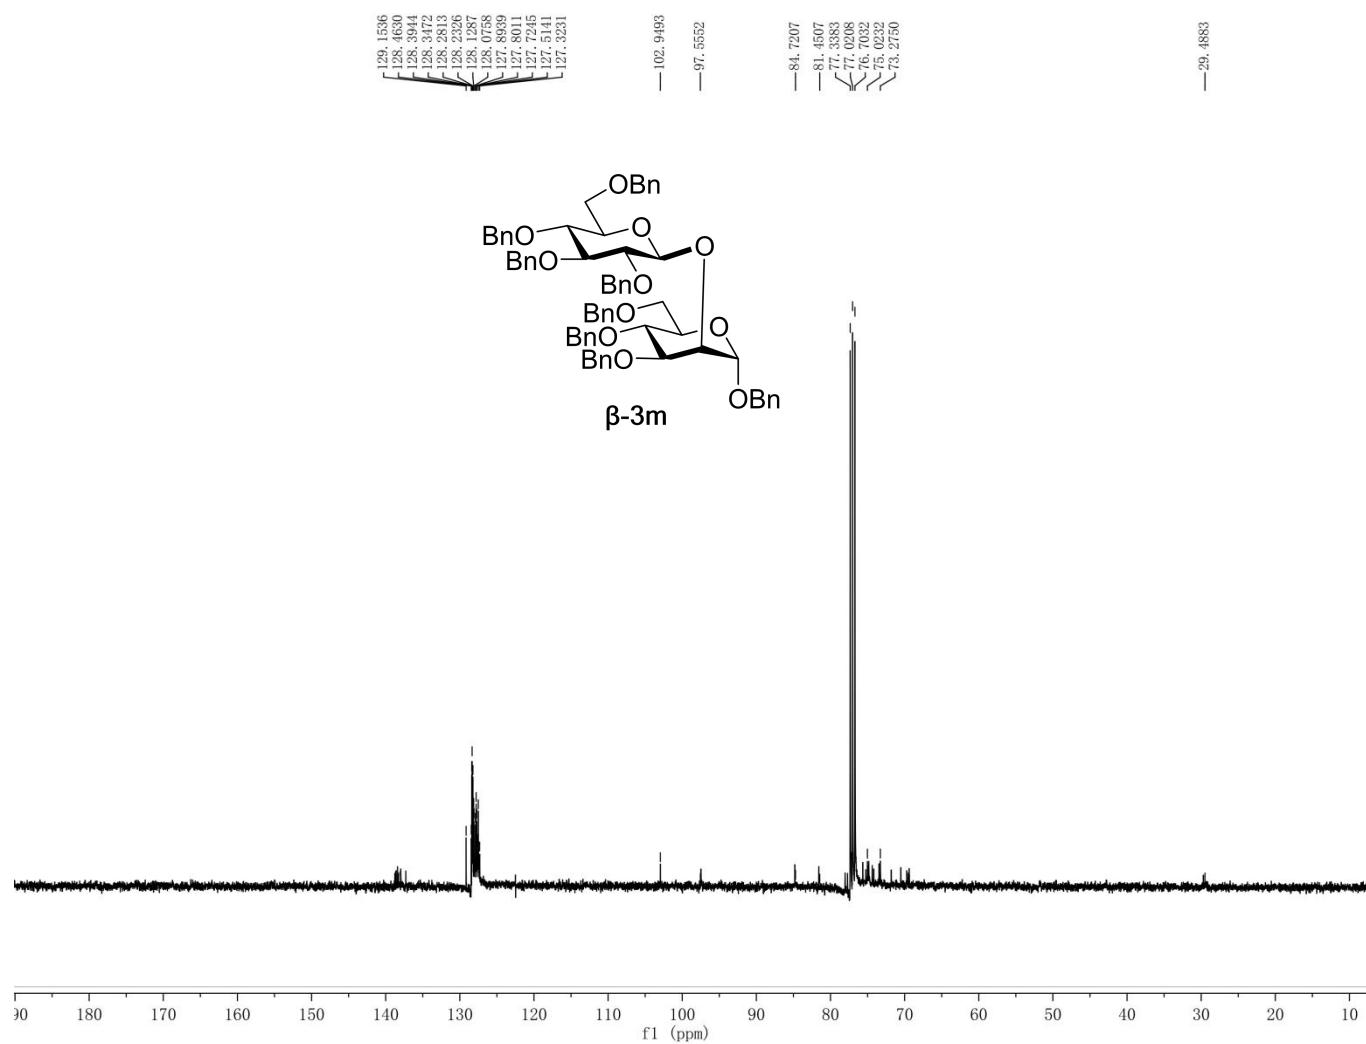

Figure S54.  $^{13}\text{C}$  NMR (400 MHz,  $\text{CDCl}_3$ ) spectrum of  $\beta\text{-3m}$



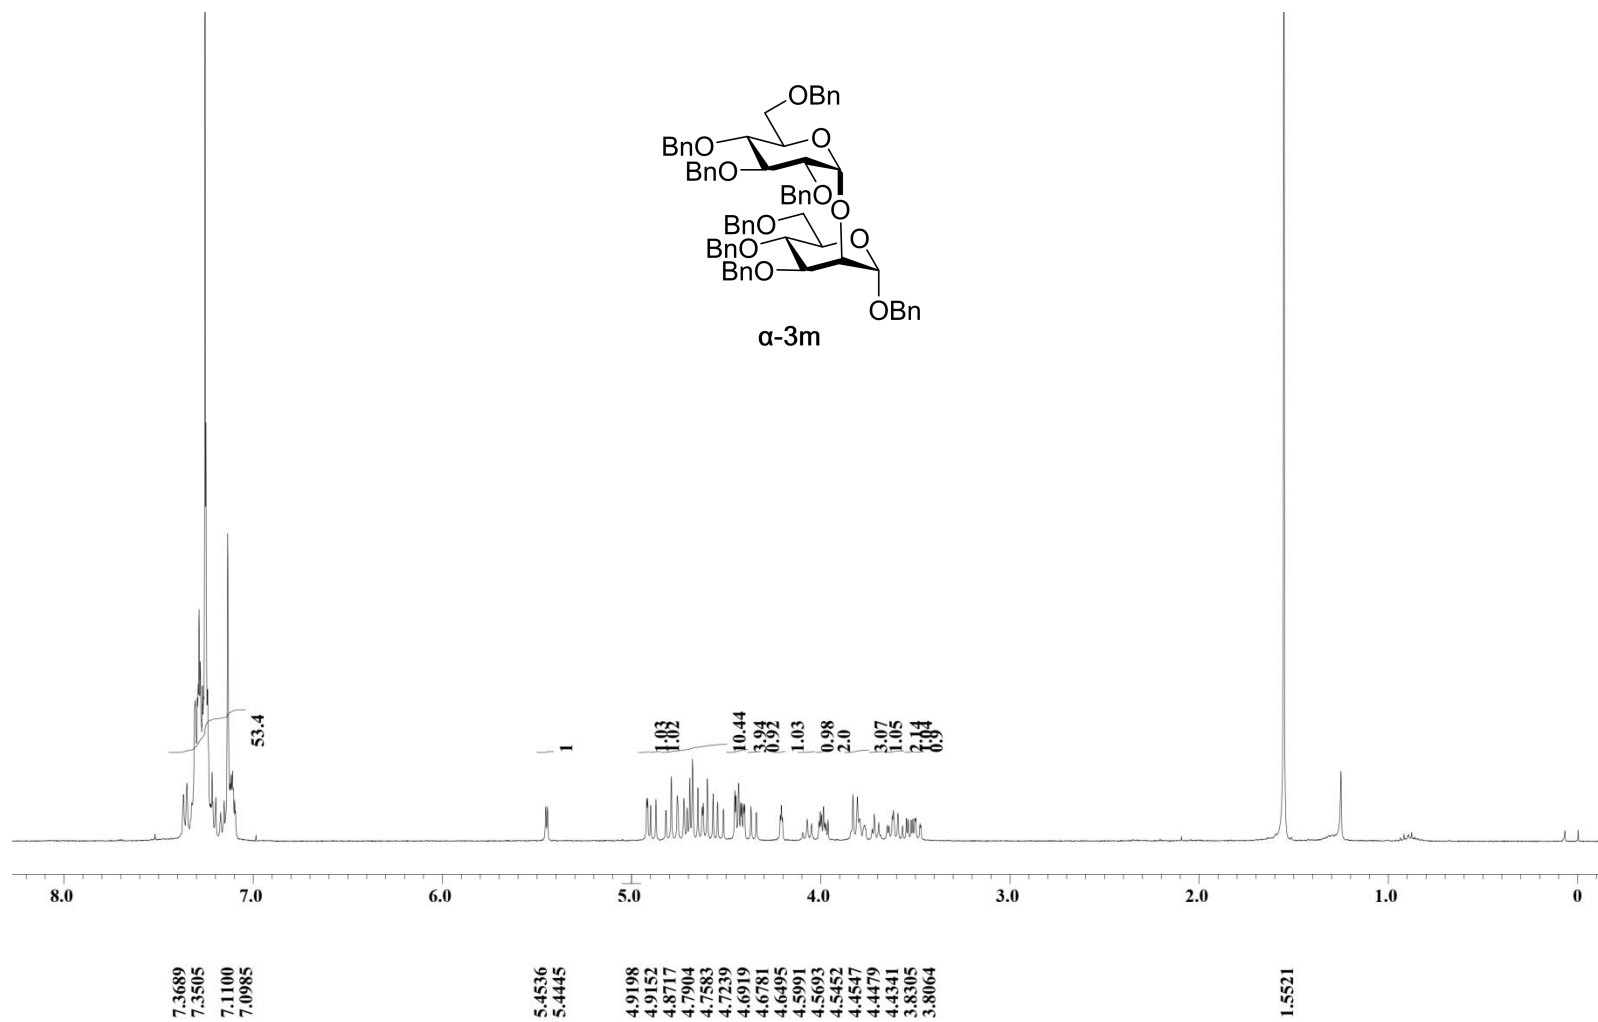

**Figure S55.** <sup>1</sup>H NMR (400 MHz, CDCl<sub>3</sub>) spectrum of **α-3m**

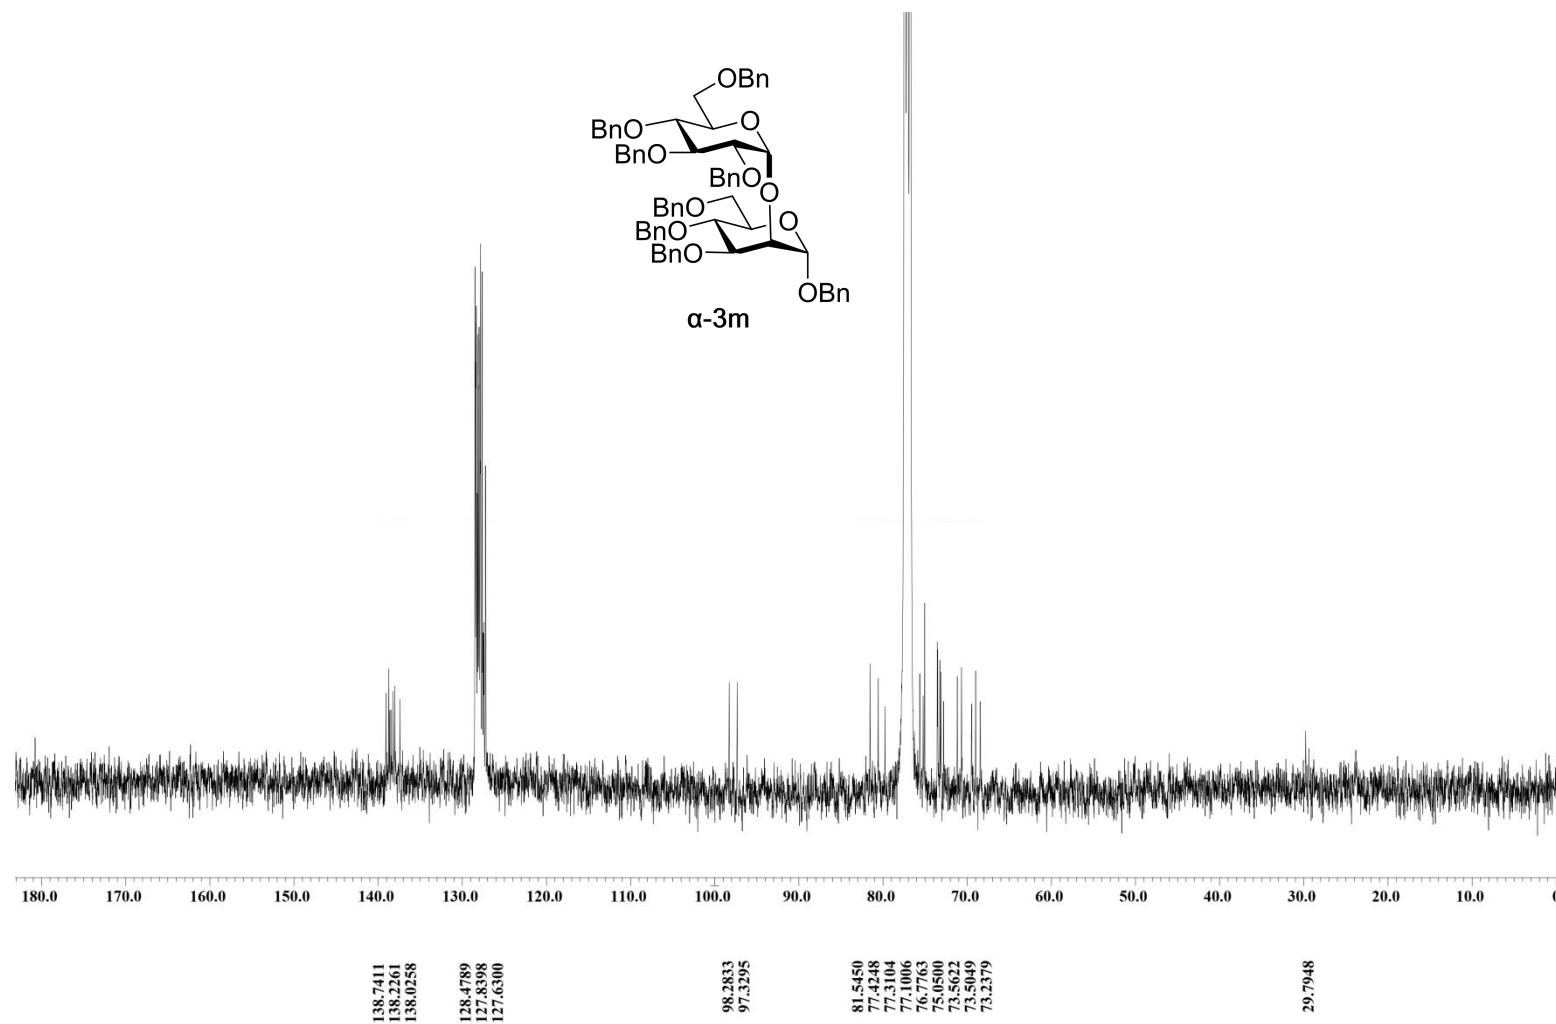

Figure S56. <sup>13</sup>C NMR (400 MHz, CDCl<sub>3</sub>) spectrum of **α-3m**



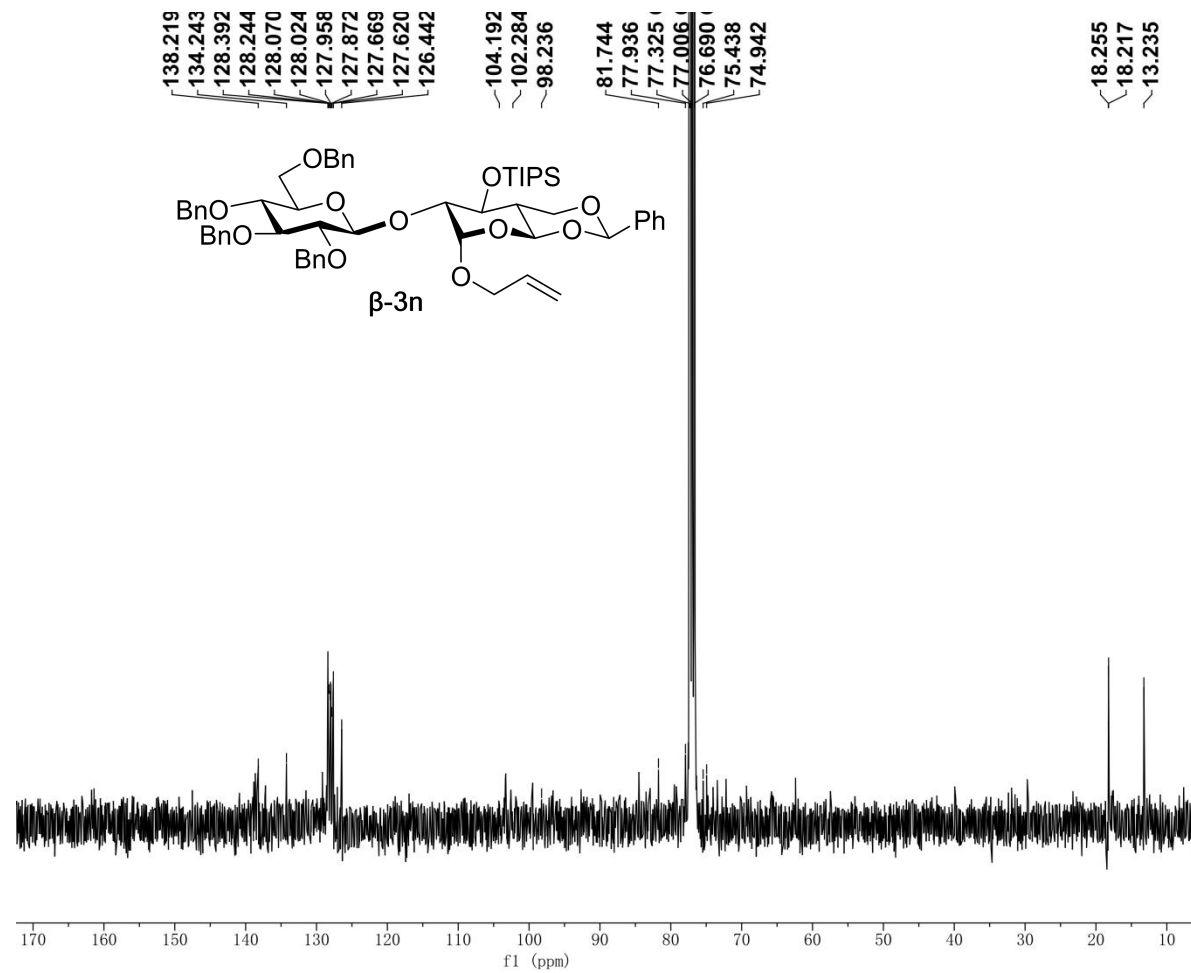

Figure S58. <sup>13</sup>C NMR (400 MHz, CDCl<sub>3</sub>) spectrum of **β-3n**

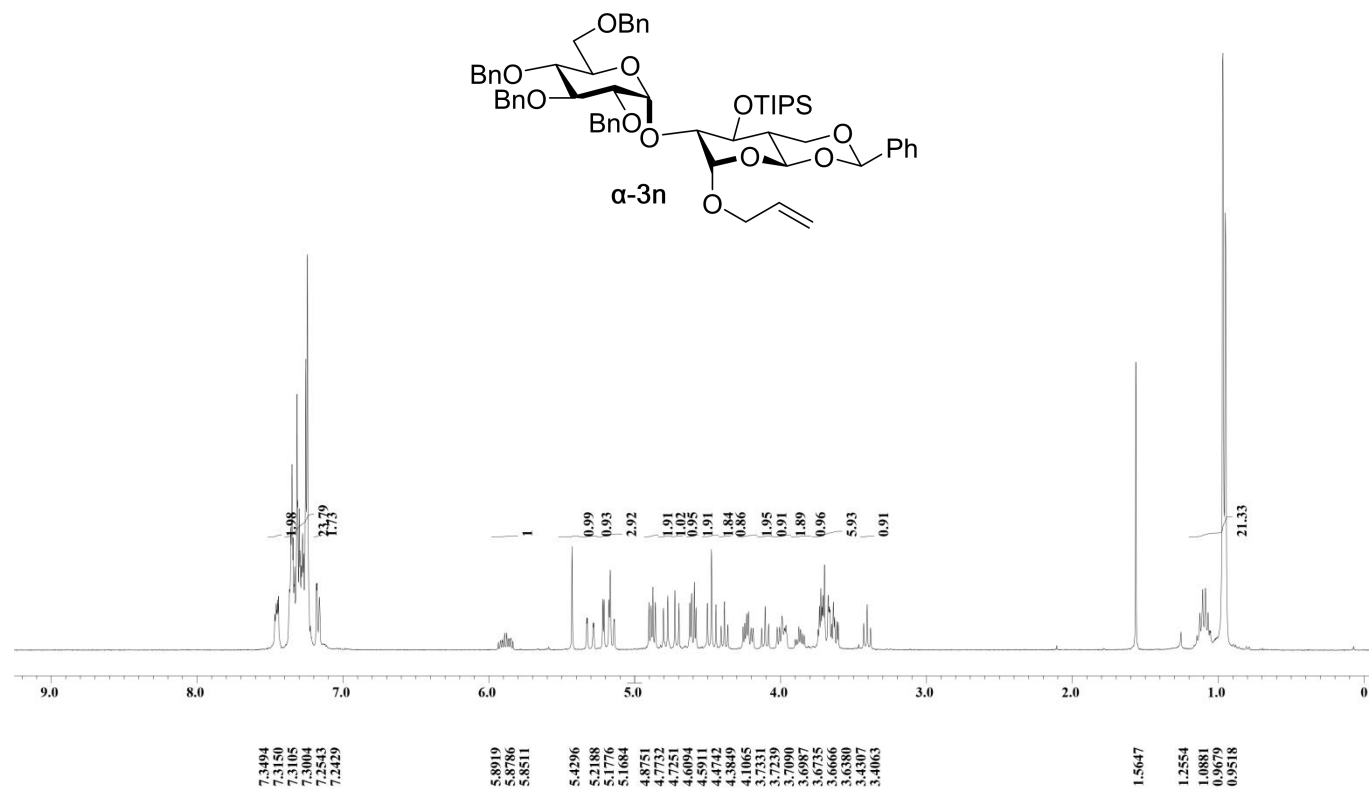

**Figure S59.**  $^1\text{H}$  NMR (400 MHz,  $\text{CDCl}_3$ ) spectrum of  $\alpha$ -3n

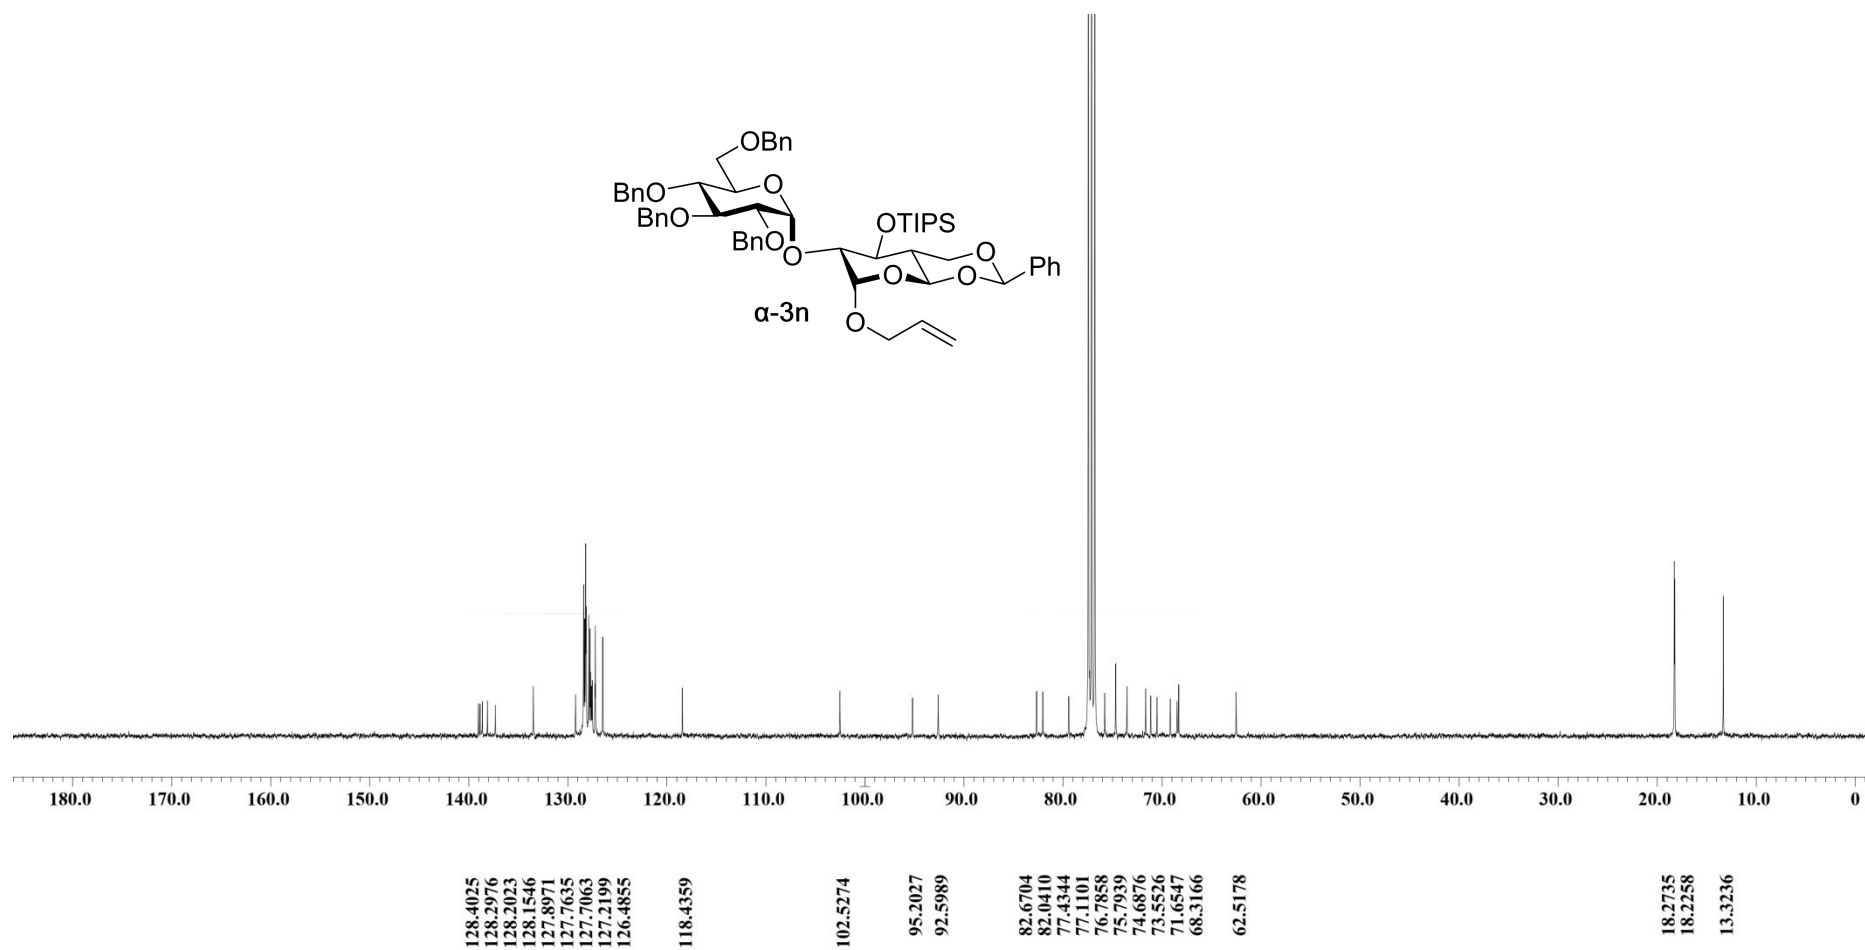

Figure S60.  $^{13}\text{C}$  NMR (400 MHz,  $\text{CDCl}_3$ ) spectrum of  $\alpha$ -3n

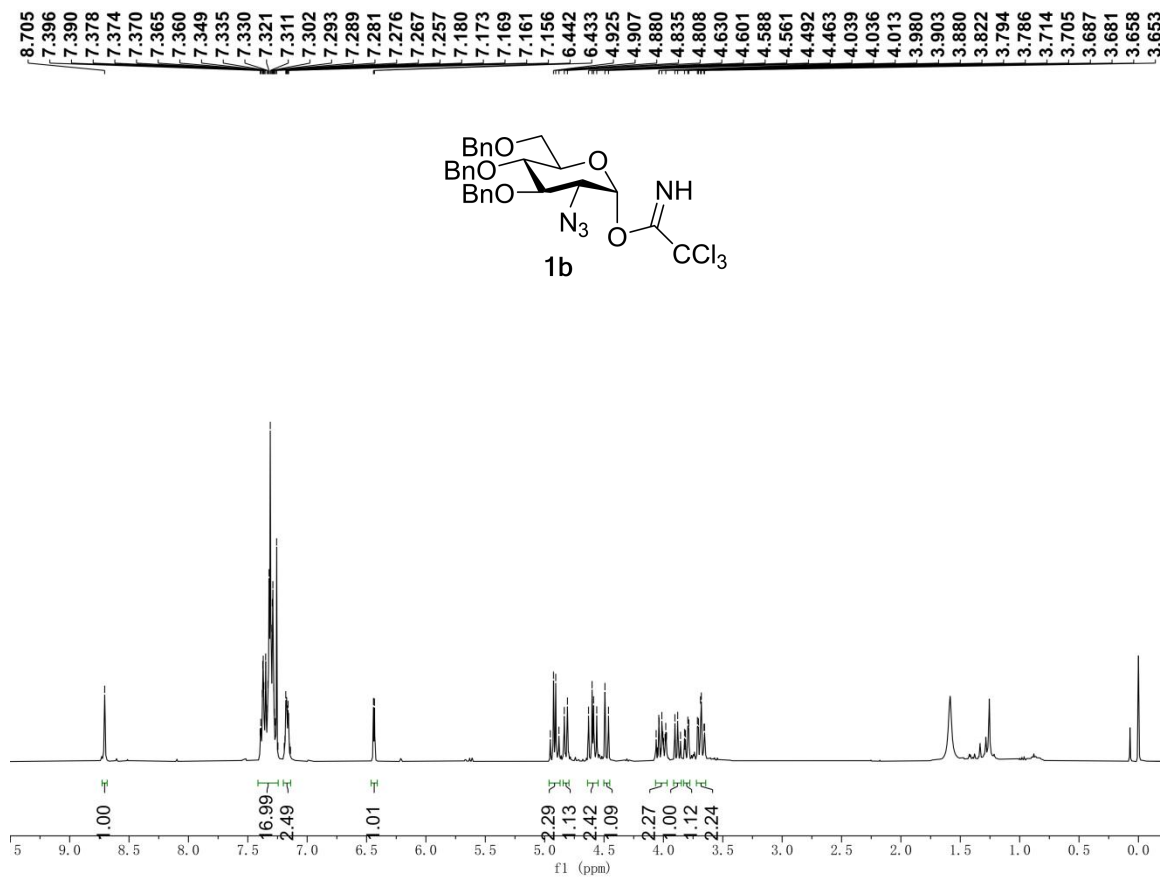

Figure S61. <sup>1</sup>H NMR (400 MHz, CDCl<sub>3</sub>) spectrum of **1b**

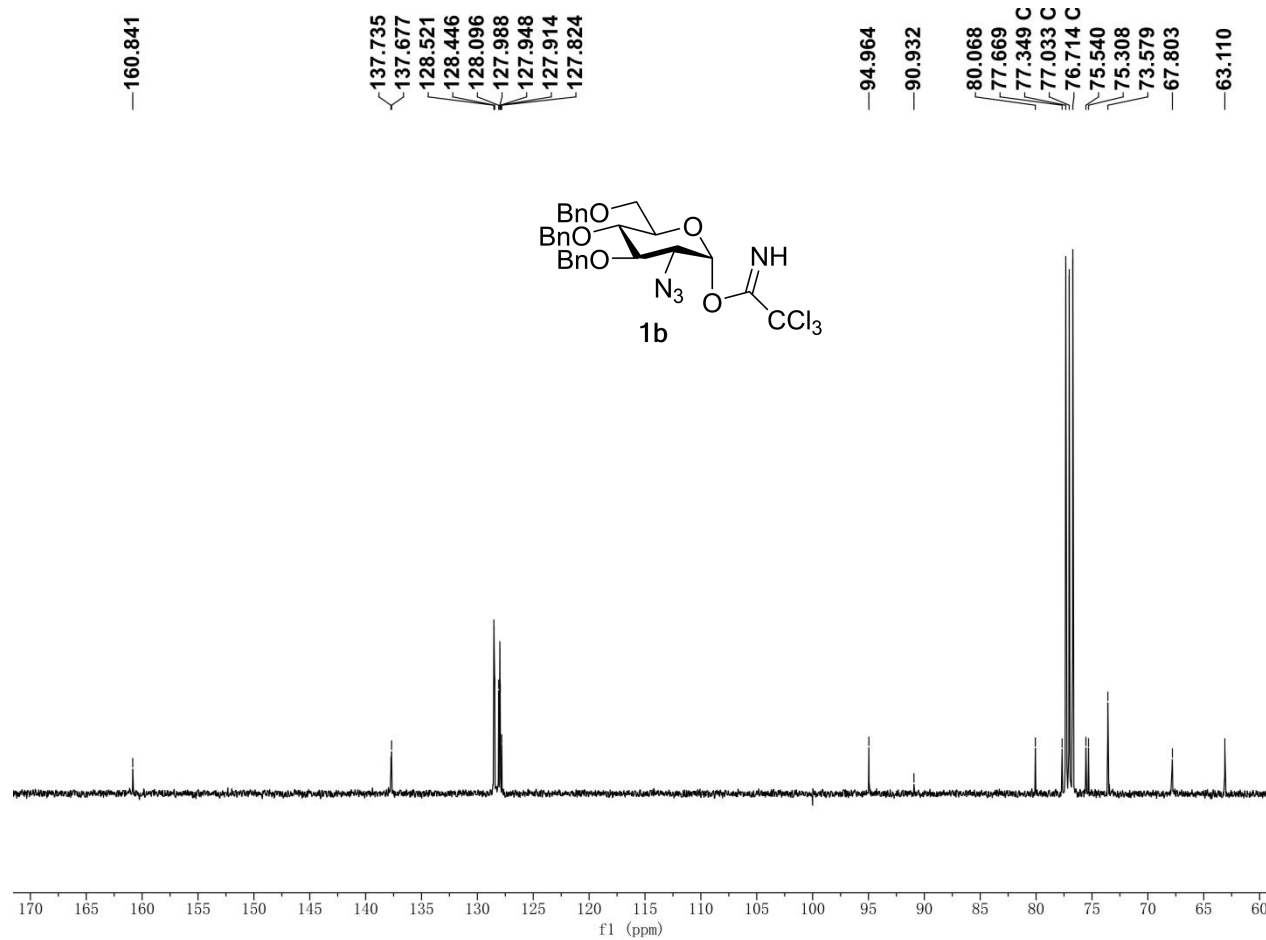

**Figure S62.** <sup>13</sup>C NMR (400 MHz, CDCl<sub>3</sub>) spectrum of **1b**



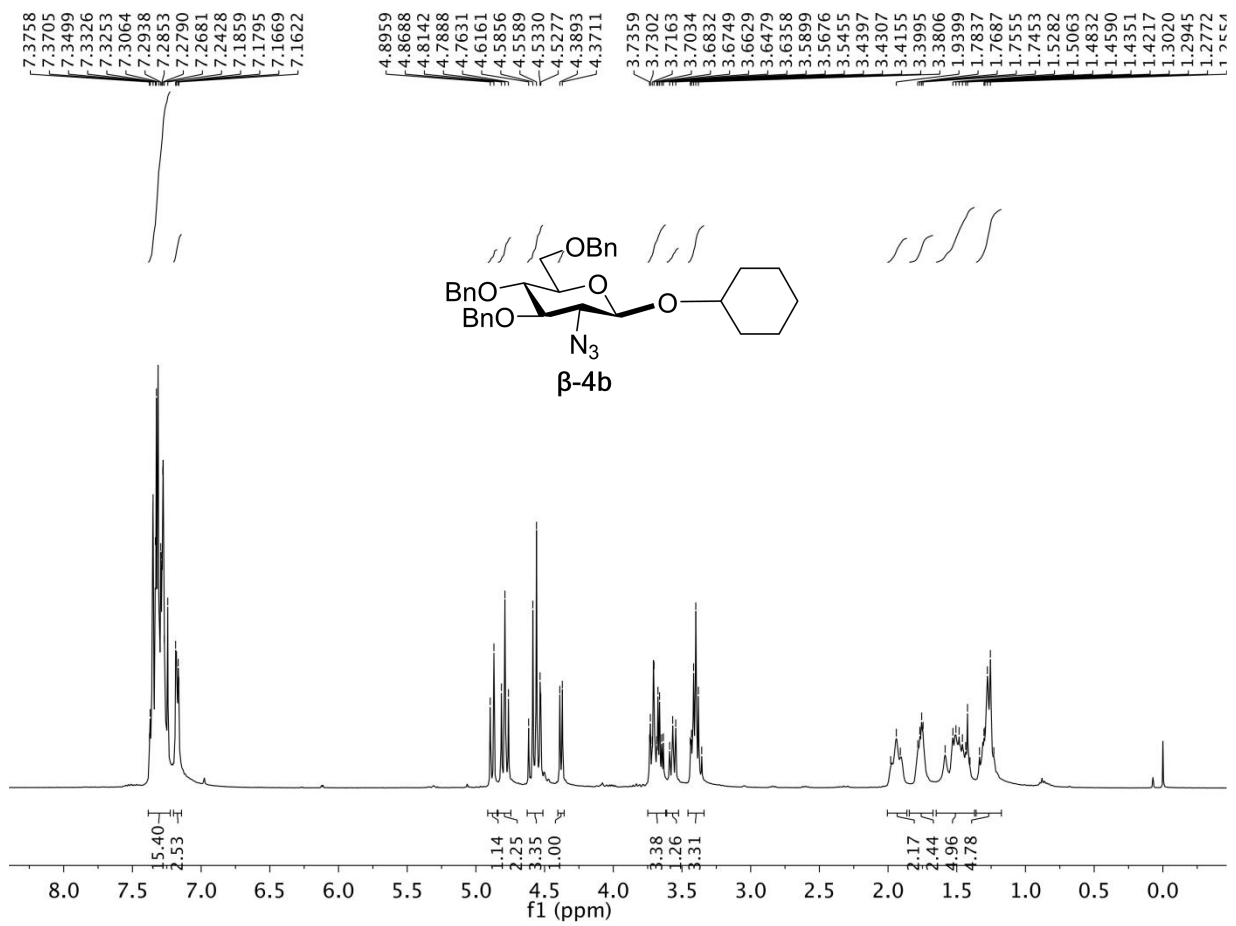

**Figure S63.** <sup>1</sup>H NMR (400 MHz, CDCl<sub>3</sub>) spectrum of **β-4b**

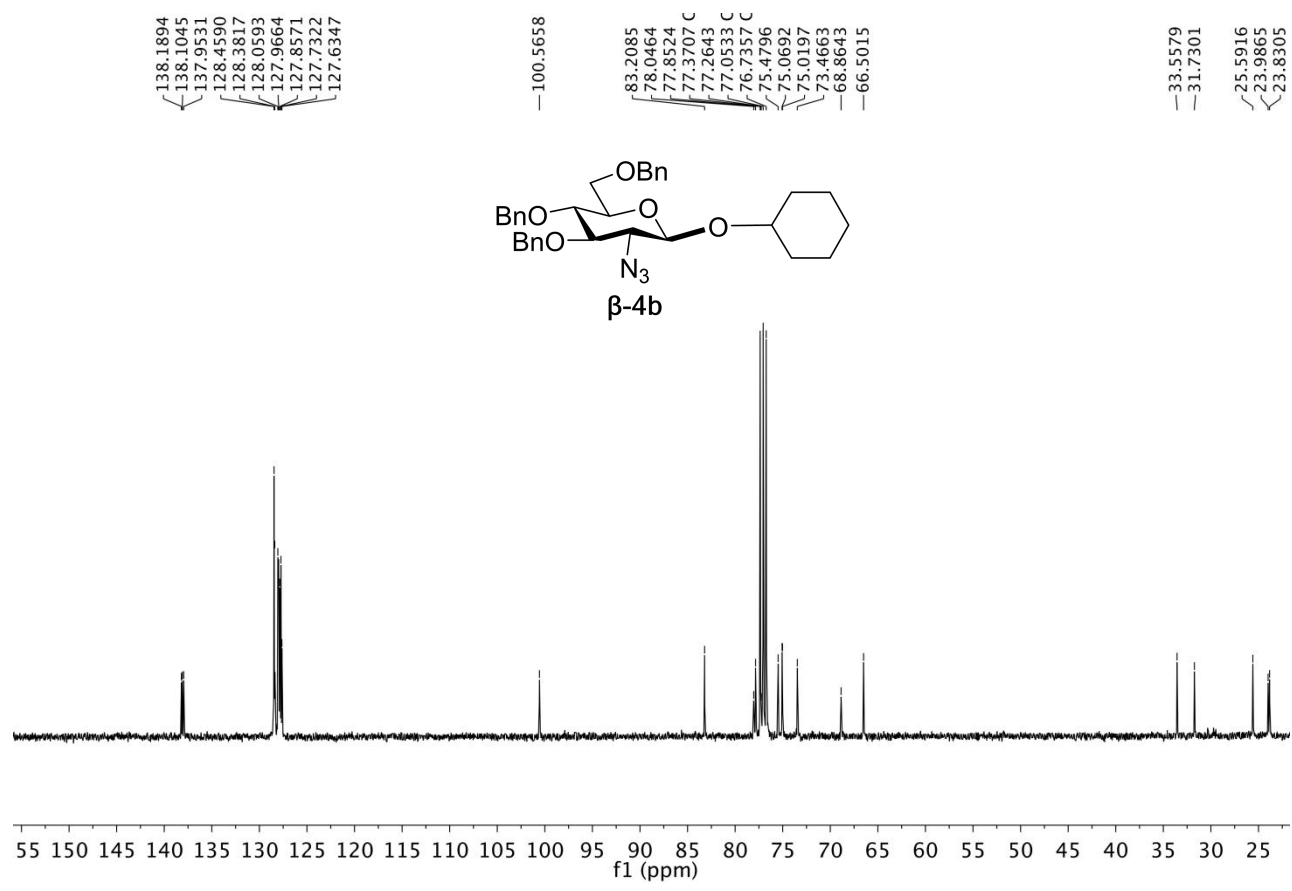

Figure S64.  $^{13}\text{C}$  NMR (400 MHz,  $\text{CDCl}_3$ ) spectrum of  $\beta$ -4b

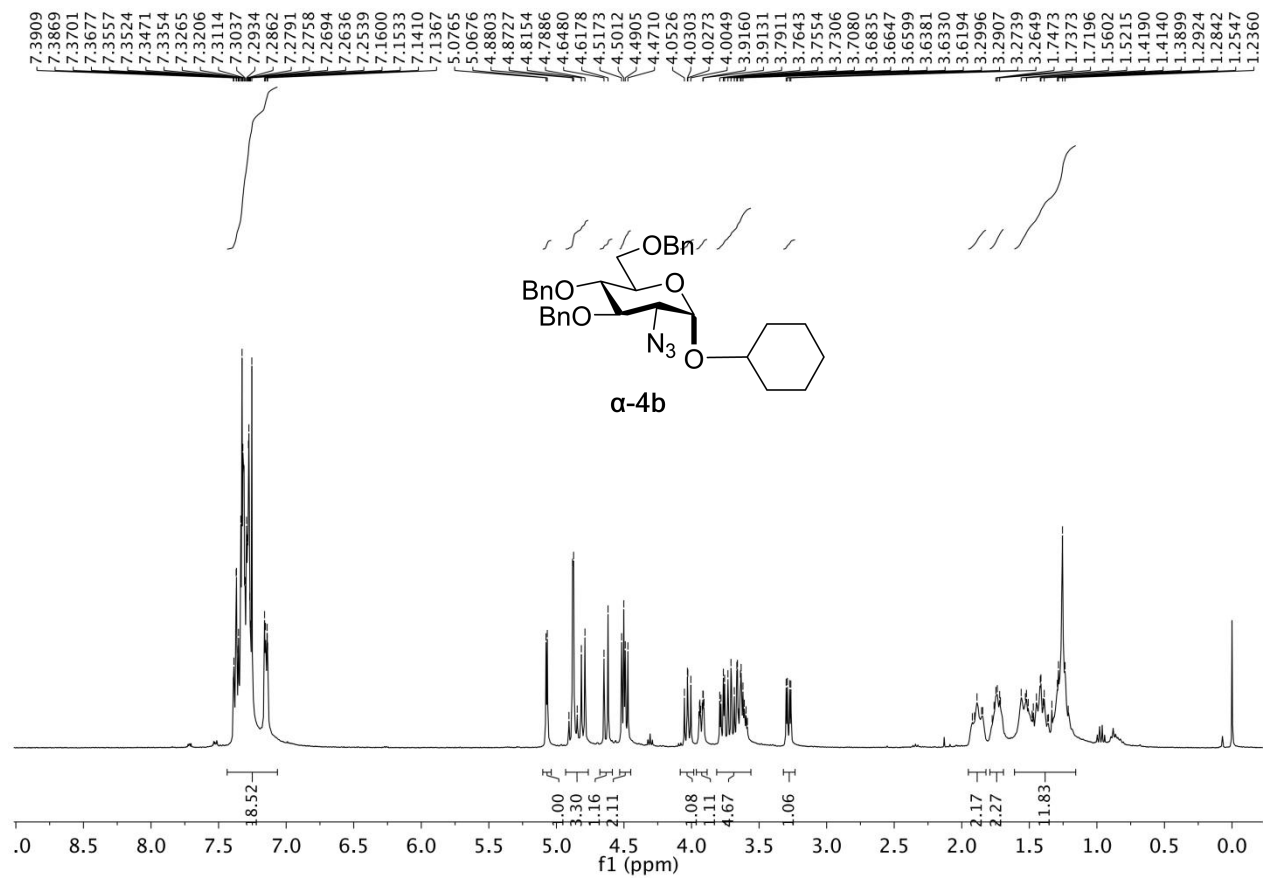

Figure S65.  $^1\text{H}$  NMR (400 MHz,  $\text{CDCl}_3$ ) spectrum of  $\alpha$ -4b

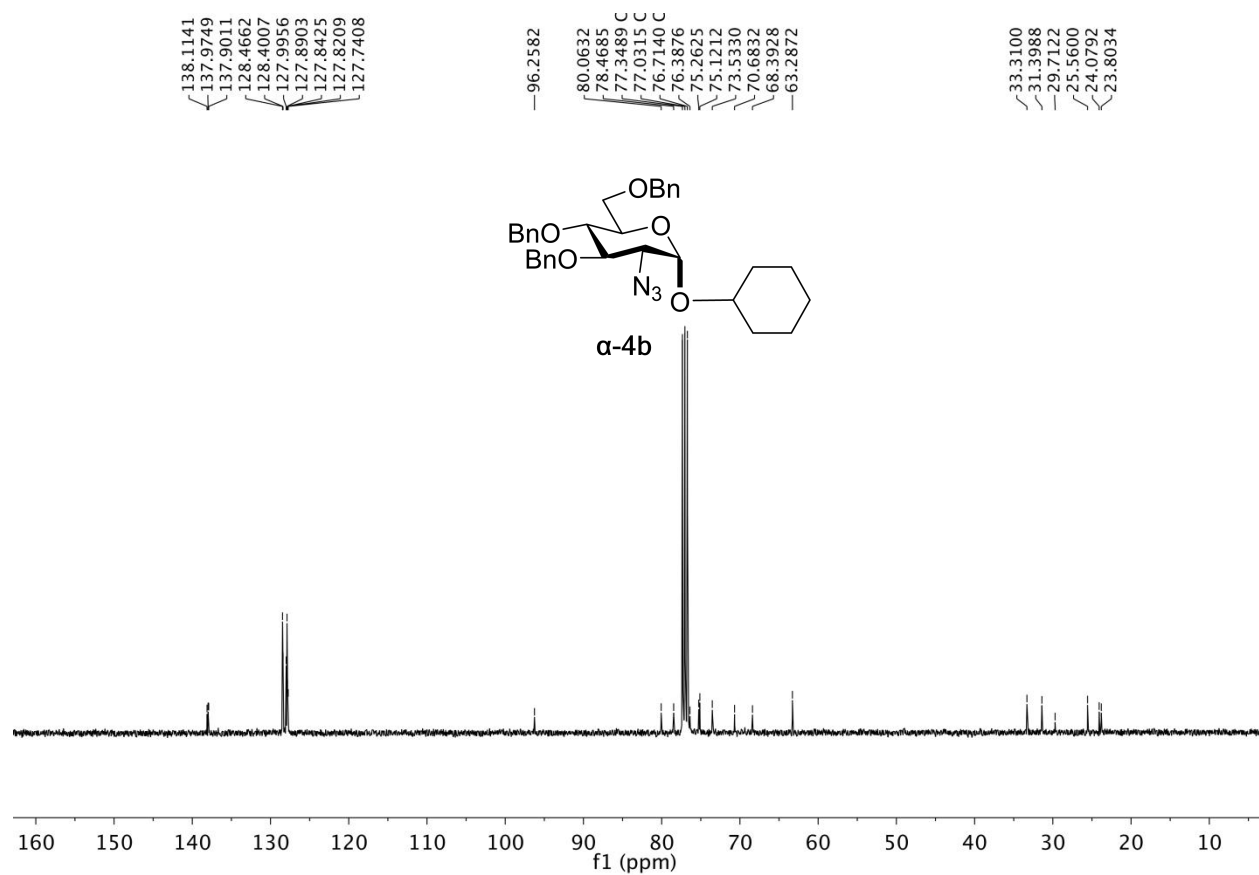

Figure S66.  $^{13}C$  NMR (400 MHz,  $CDCl_3$ ) spectrum of  $\alpha$ -4b

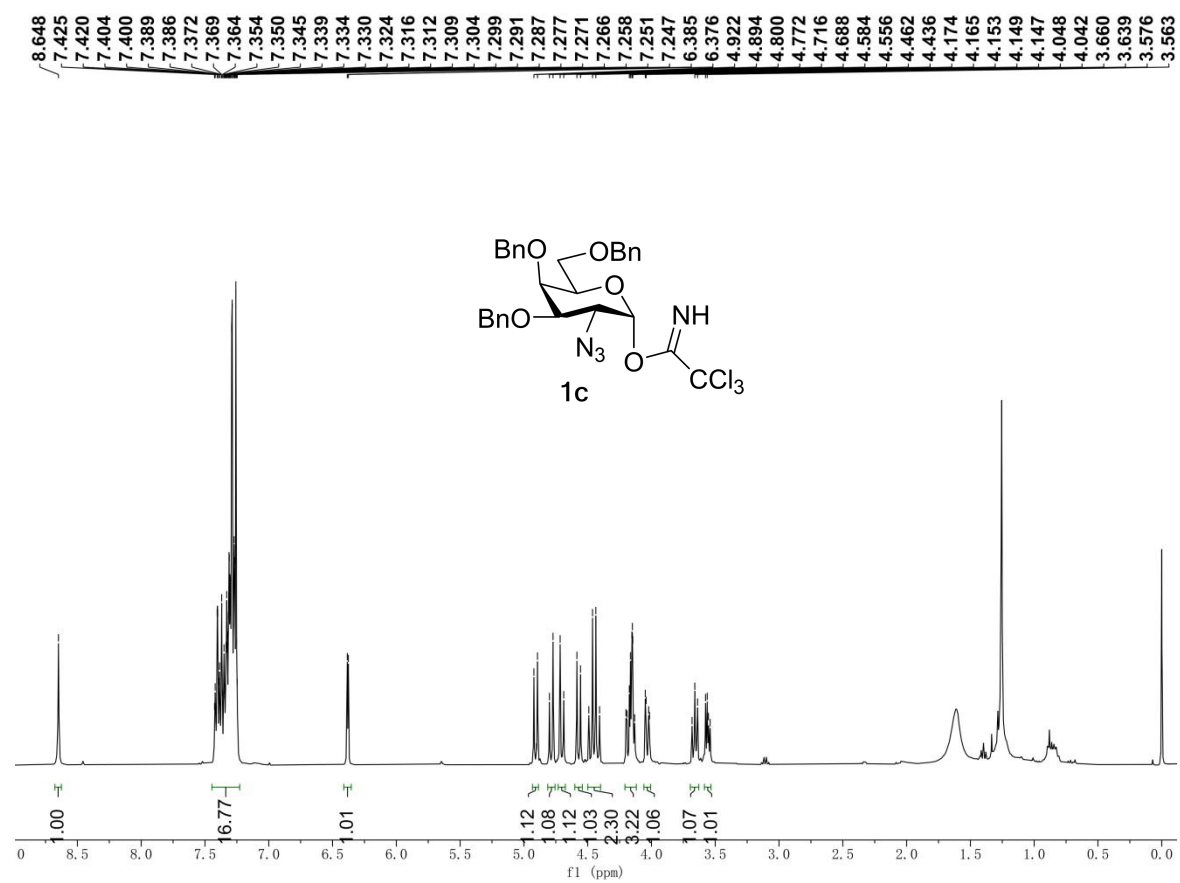

**Figure S67.** <sup>1</sup>H NMR (400 MHz, CDCl<sub>3</sub>) spectrum of **1c**

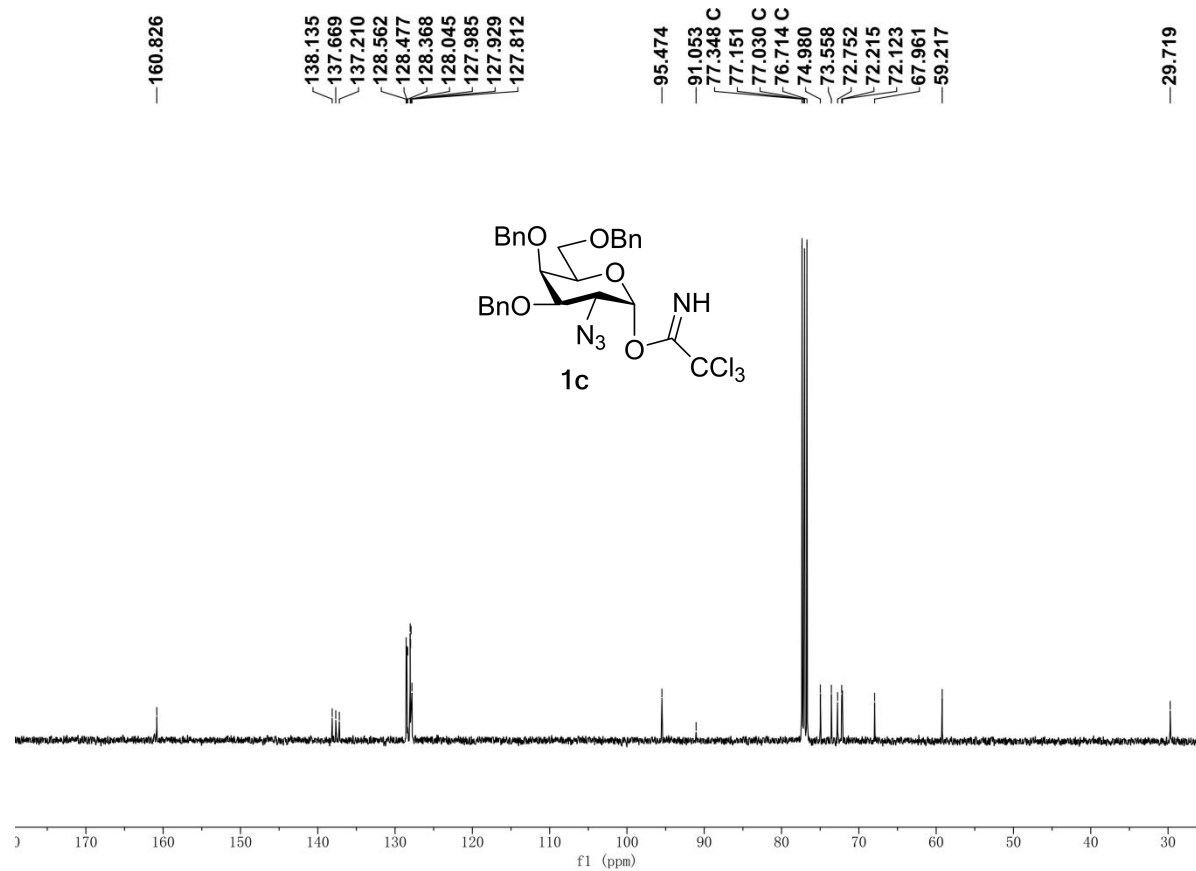

Figure S68. <sup>13</sup>C NMR (400 MHz, CDCl<sub>3</sub>) spectrum of 1c

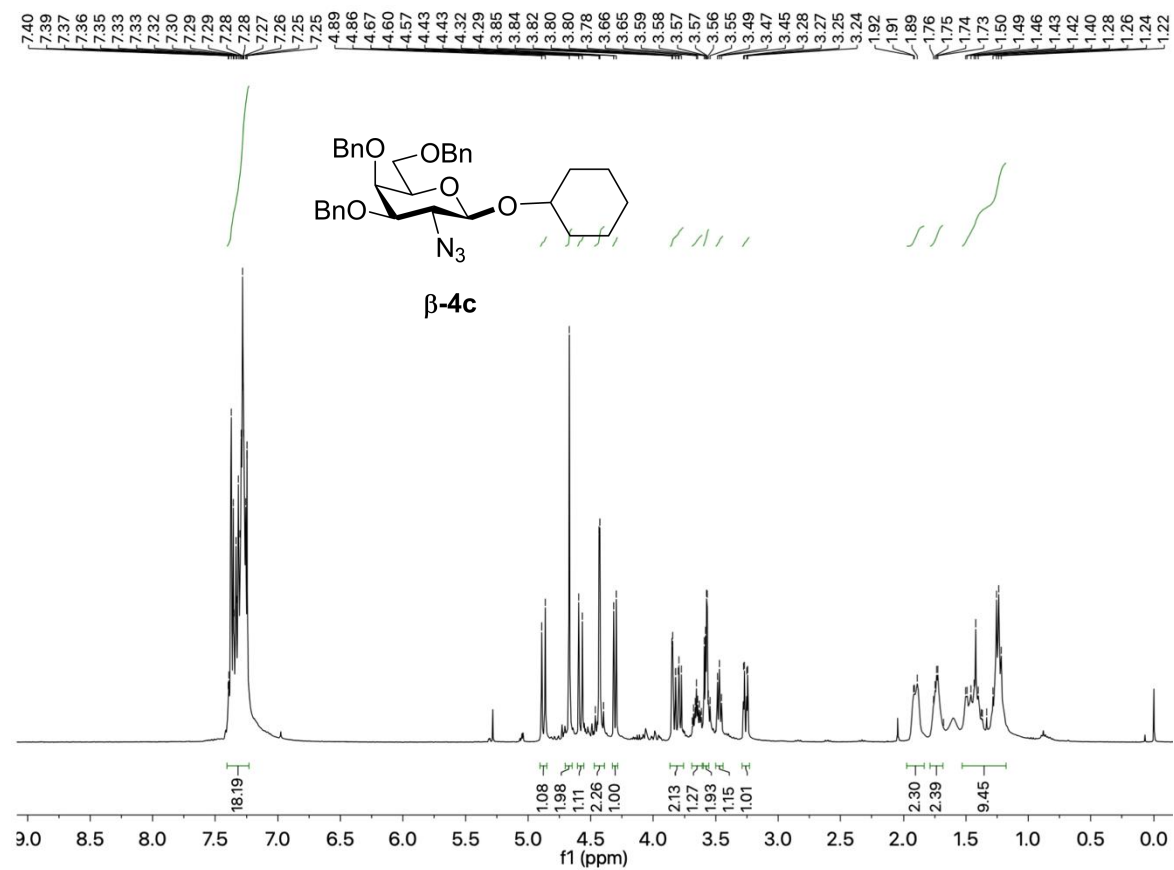

Figure S69.  $^1\text{H}$  NMR (400 MHz,  $\text{CDCl}_3$ ) spectrum of  $\beta$ -4c

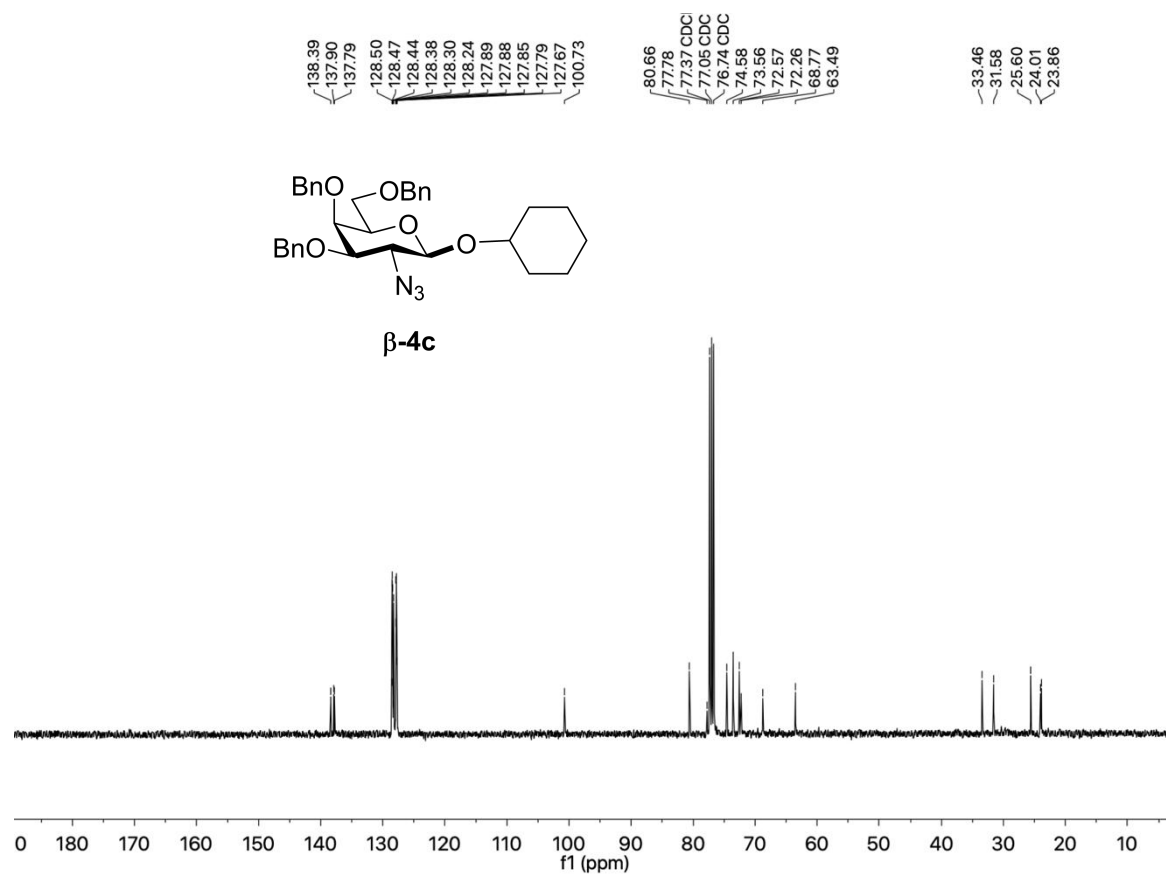

Figure S70. <sup>13</sup>C NMR (400 MHz, CDCl<sub>3</sub>) spectrum of **β-4c**



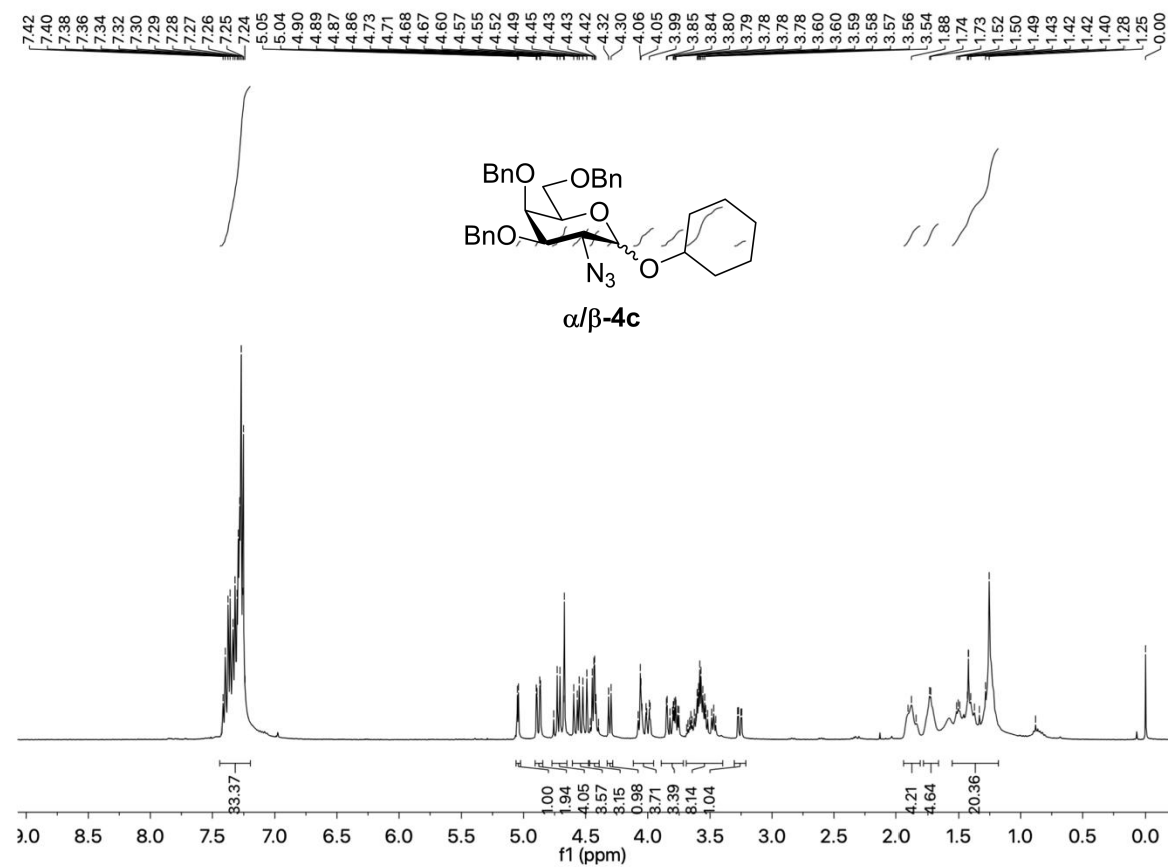

Figure S71.  $^1H$  NMR (400 MHz,  $CDCl_3$ ) spectrum of  $\alpha/\beta$ -4c

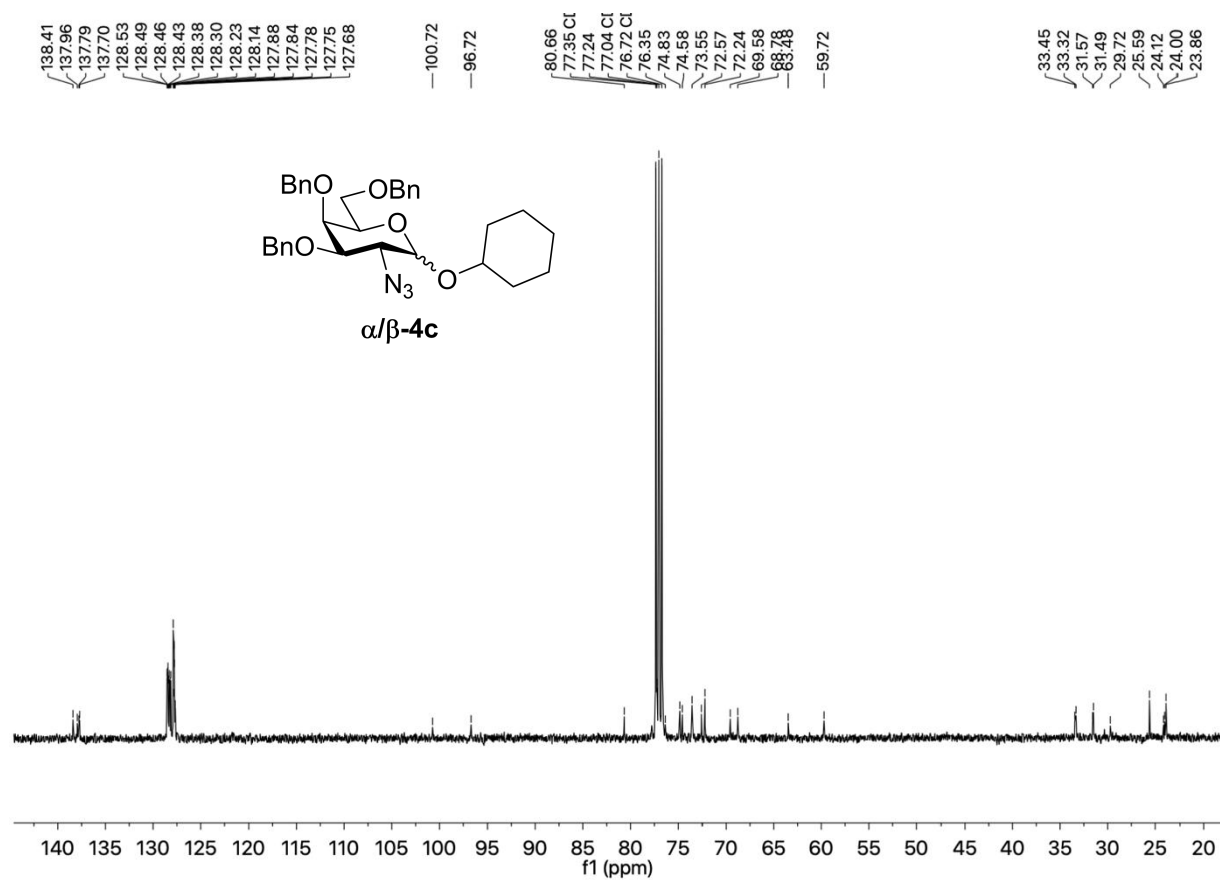

Figure S72.  $^{13}\text{C}$  NMR (400 MHz,  $\text{CDCl}_3$ ) spectrum of  $\alpha/\beta$ -4c

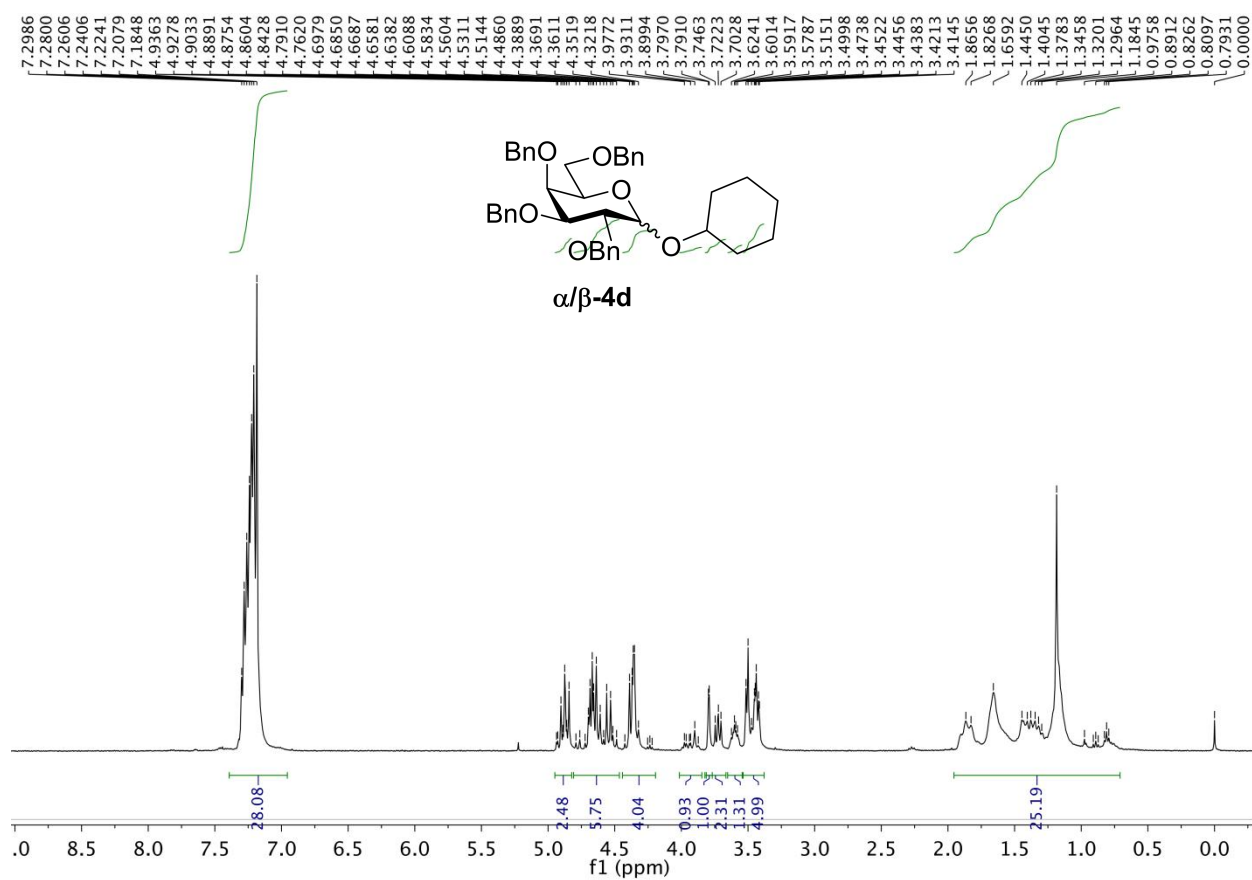

Figure S73.  $^1\text{H NMR}$  (400 MHz,  $\text{CDCl}_3$ ) spectrum of  $\alpha/\beta$ -4d (condition A)

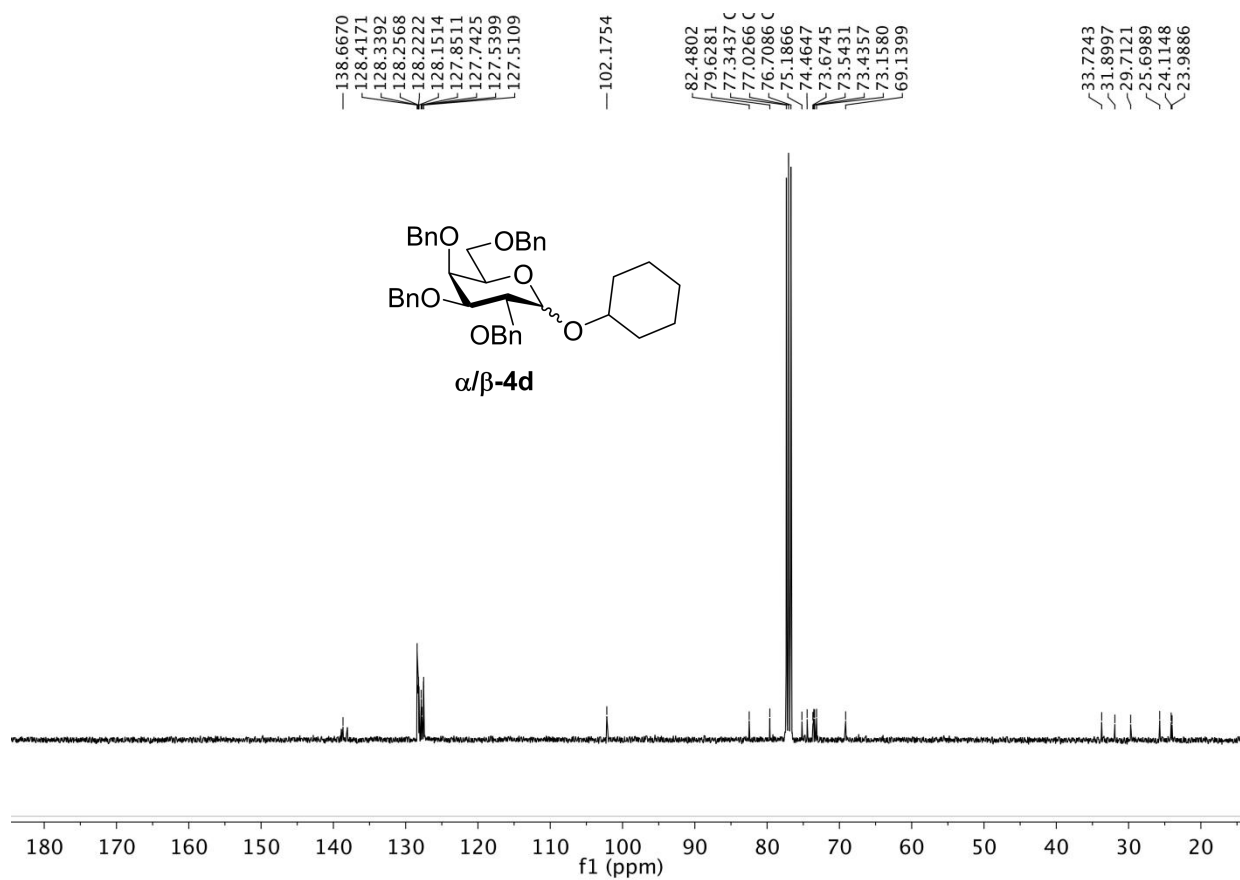

**Figure S74.** <sup>13</sup>C NMR (400 MHz, CDCl<sub>3</sub>) spectrum of  $\alpha/\beta$ -4d (condition A)

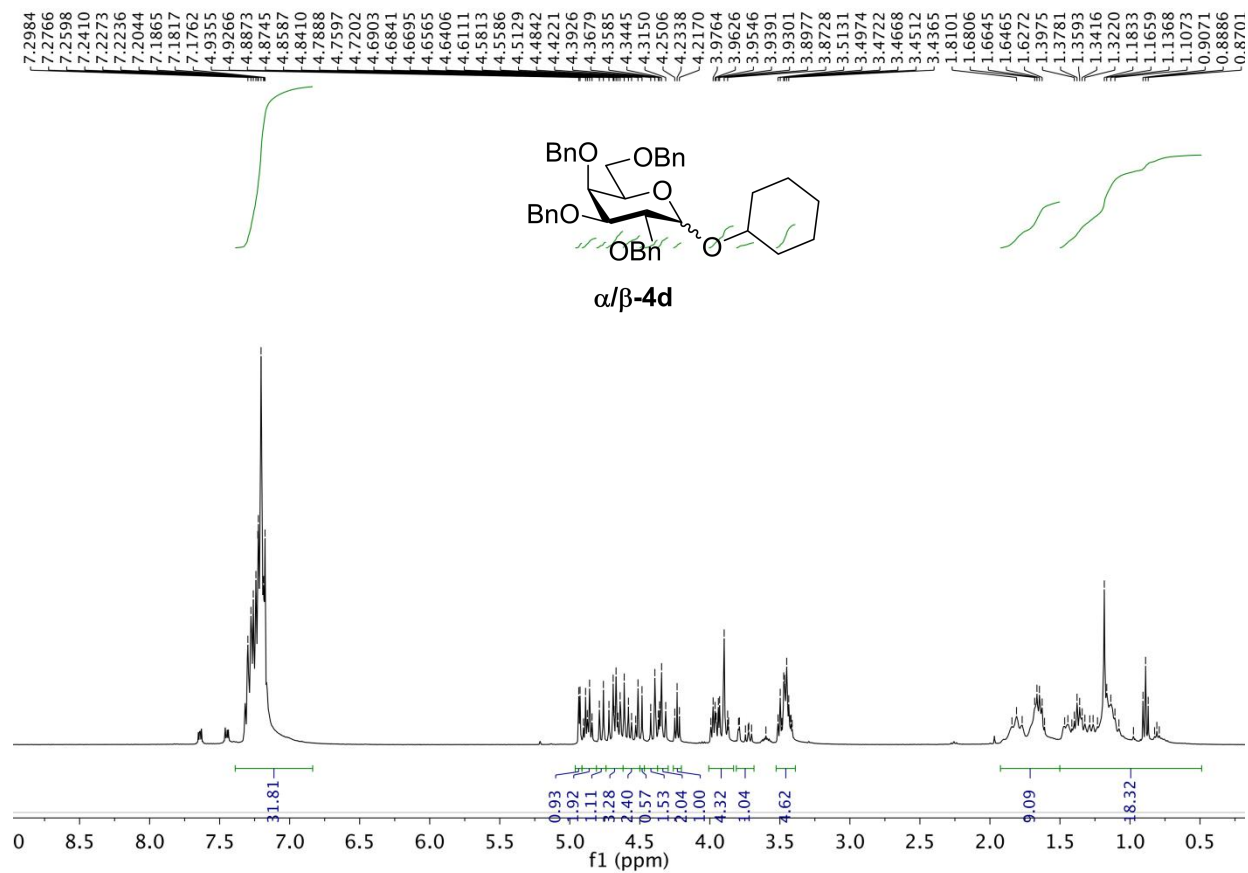

**Figure S75.**  $^1\text{H}$  NMR (400 MHz,  $\text{CDCl}_3$ ) spectrum of  $\alpha/\beta$ -4d (condition B)

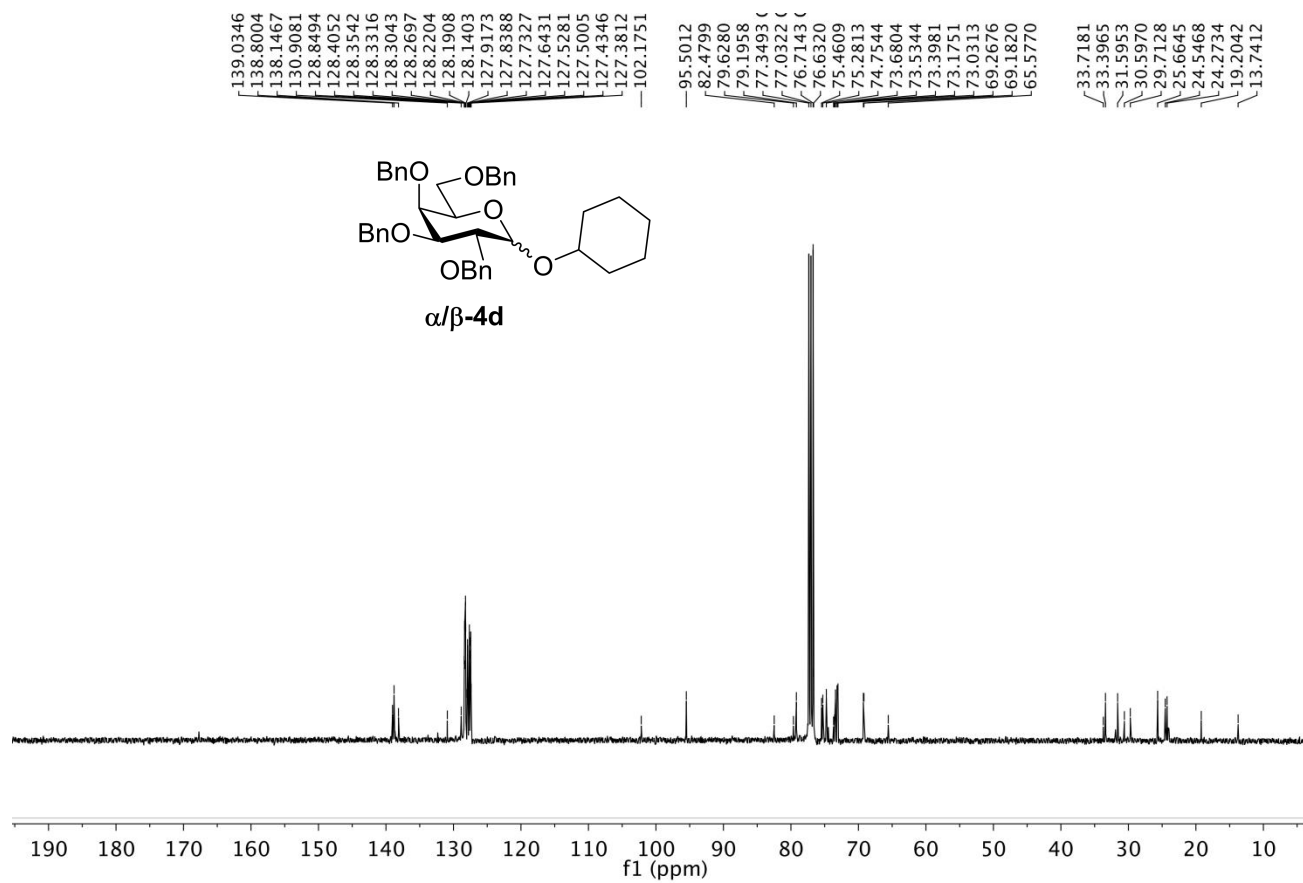

Figure S76.  $^{13}\text{C}$  NMR (400 MHz,  $\text{CDCl}_3$ ) spectrum of  $\alpha/\beta$ -4d (condition B)

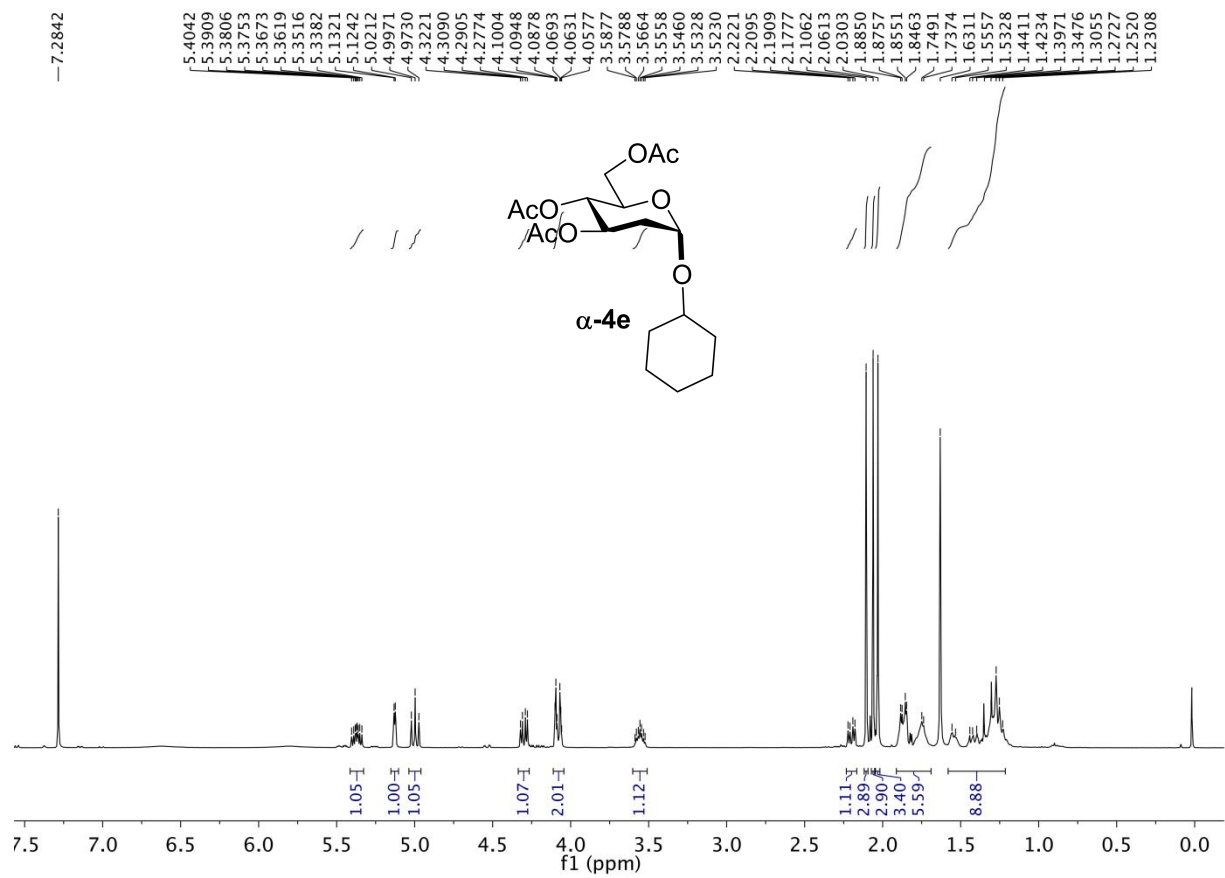

Figure S77.  $^1\text{H}$  NMR (400 MHz,  $\text{CDCl}_3$ ) spectrum of  $\alpha$ -4e

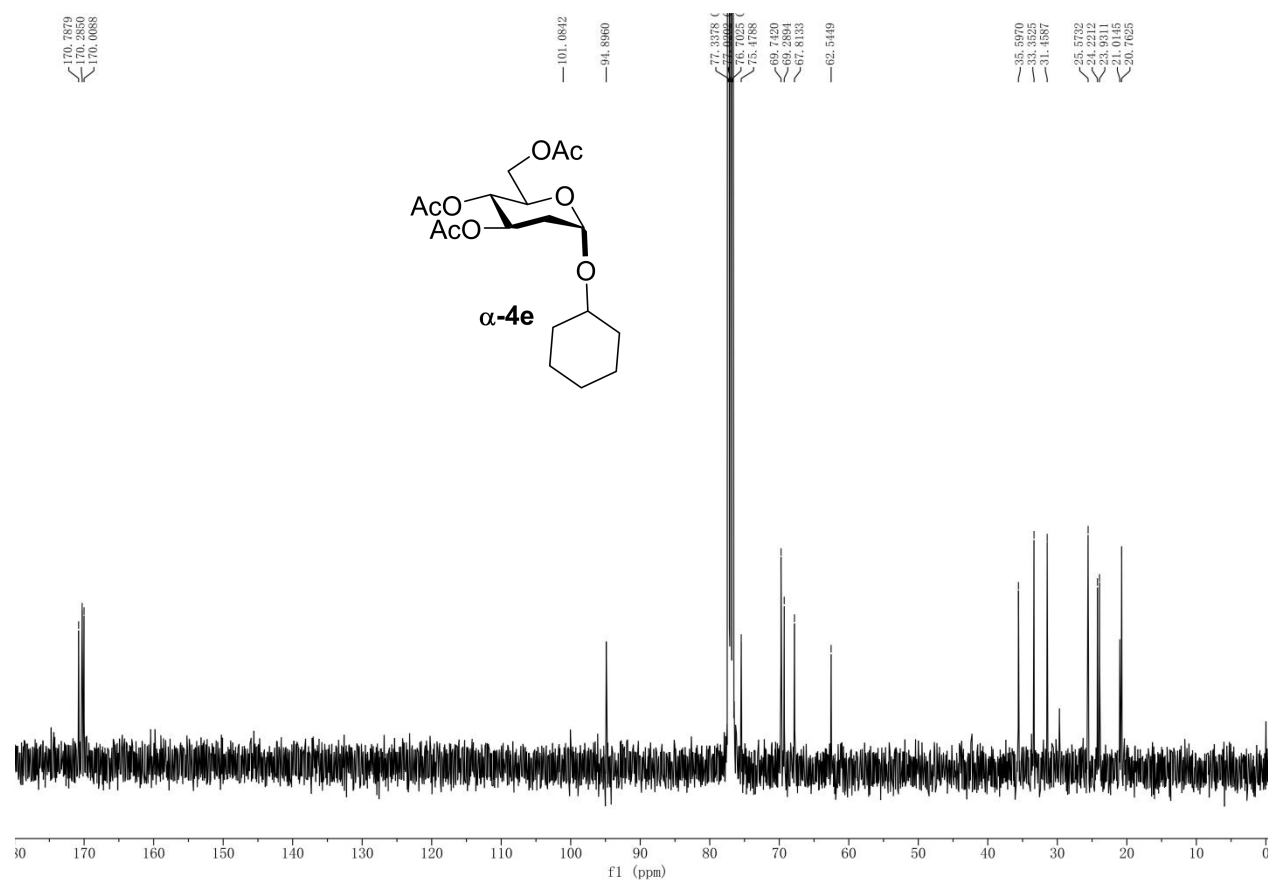

Figure S78. <sup>13</sup>C NMR (400 MHz, CDCl<sub>3</sub>) spectrum of **α-4e**



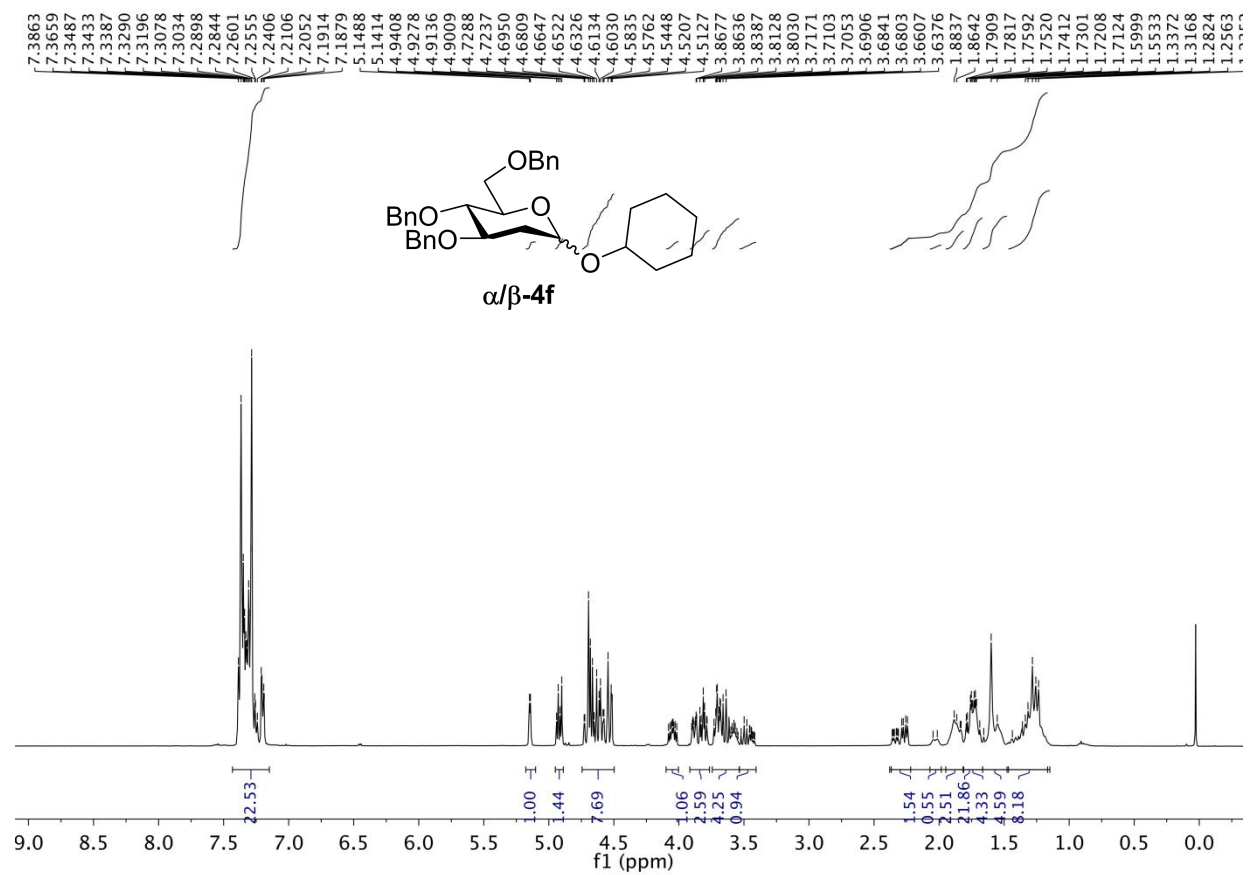

Figure S79.  $^1\text{H}$  NMR (400 MHz,  $\text{CDCl}_3$ ) spectrum of  $\alpha/\beta$ -4f

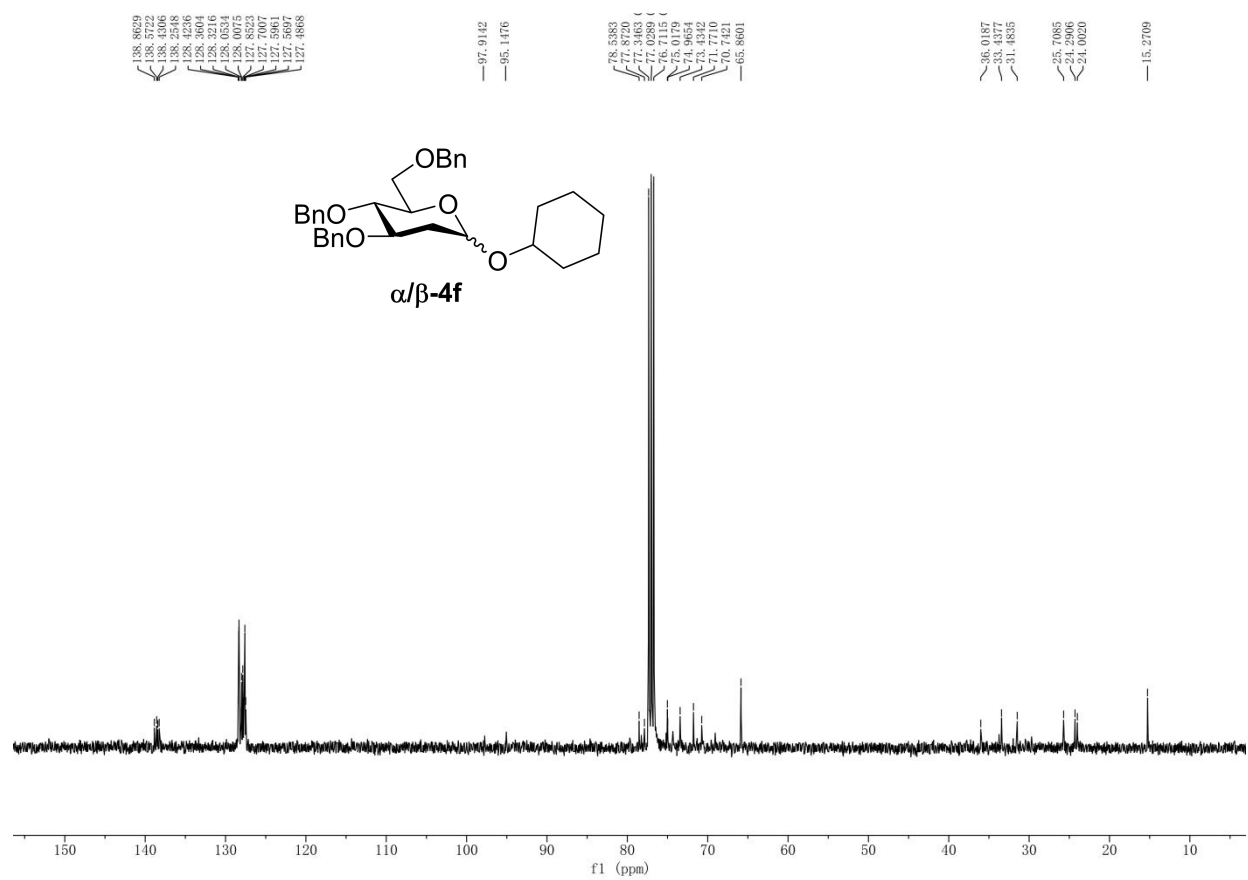

Figure S80.  $^{13}\text{C}$  NMR (400 MHz,  $\text{CDCl}_3$ ) spectrum of  $\alpha/\beta$ -4f

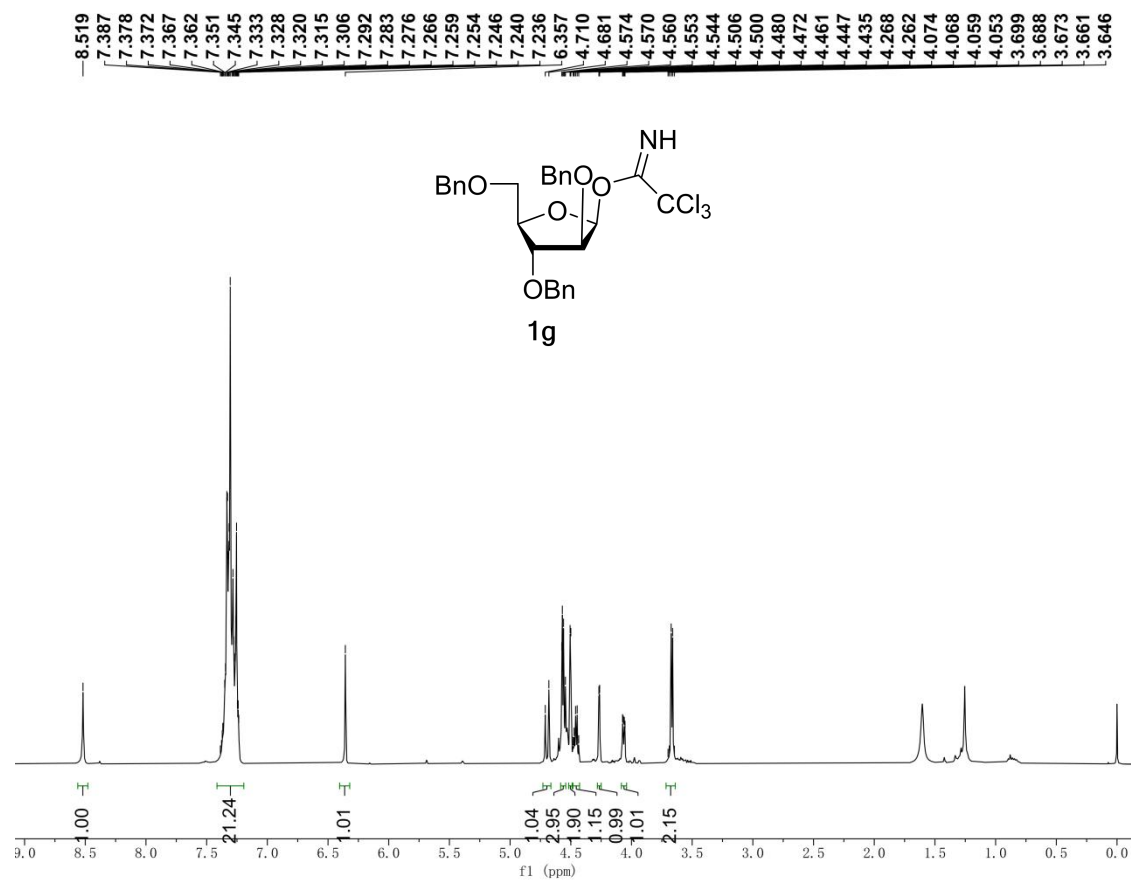

**Figure S81.**  $^1\text{H}$  NMR (400 MHz,  $\text{CDCl}_3$ ) spectrum of **1g**

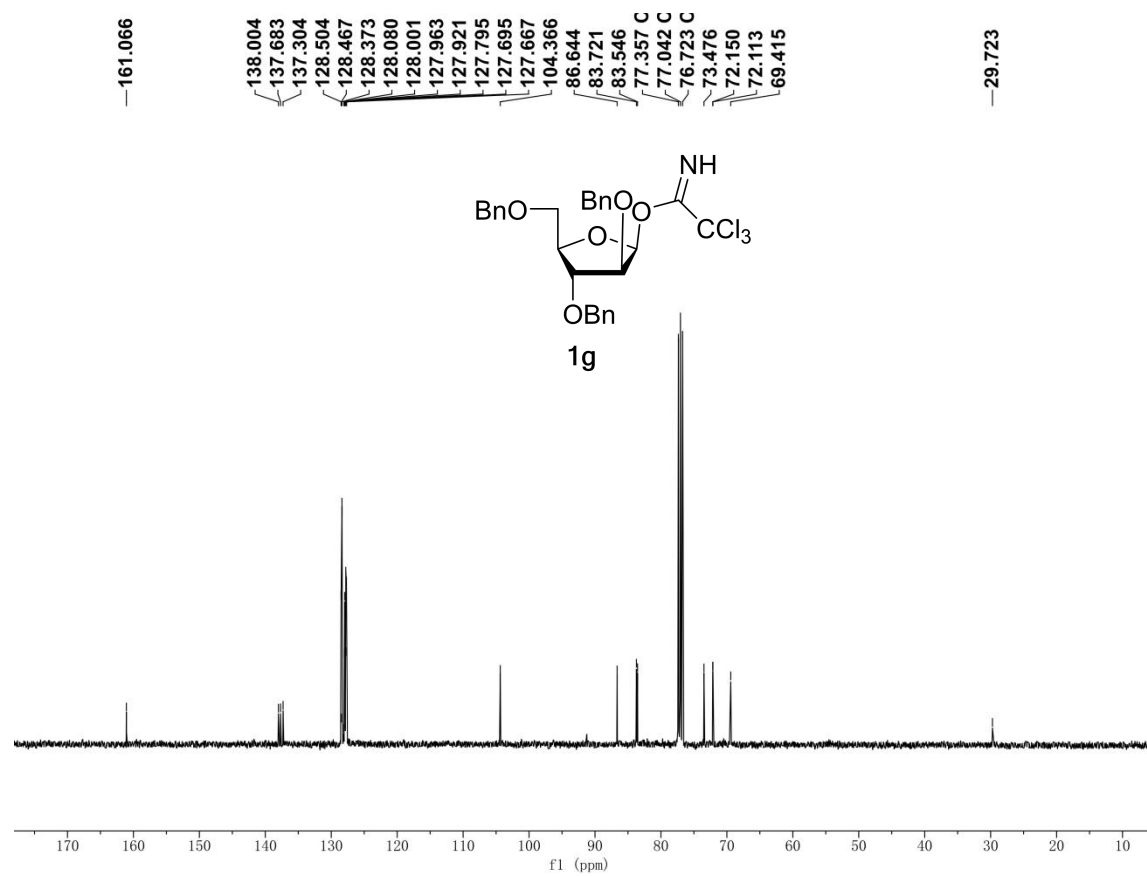

**Figure S82.** <sup>13</sup>C NMR (400 MHz, CDCl<sub>3</sub>) spectrum of **1g**

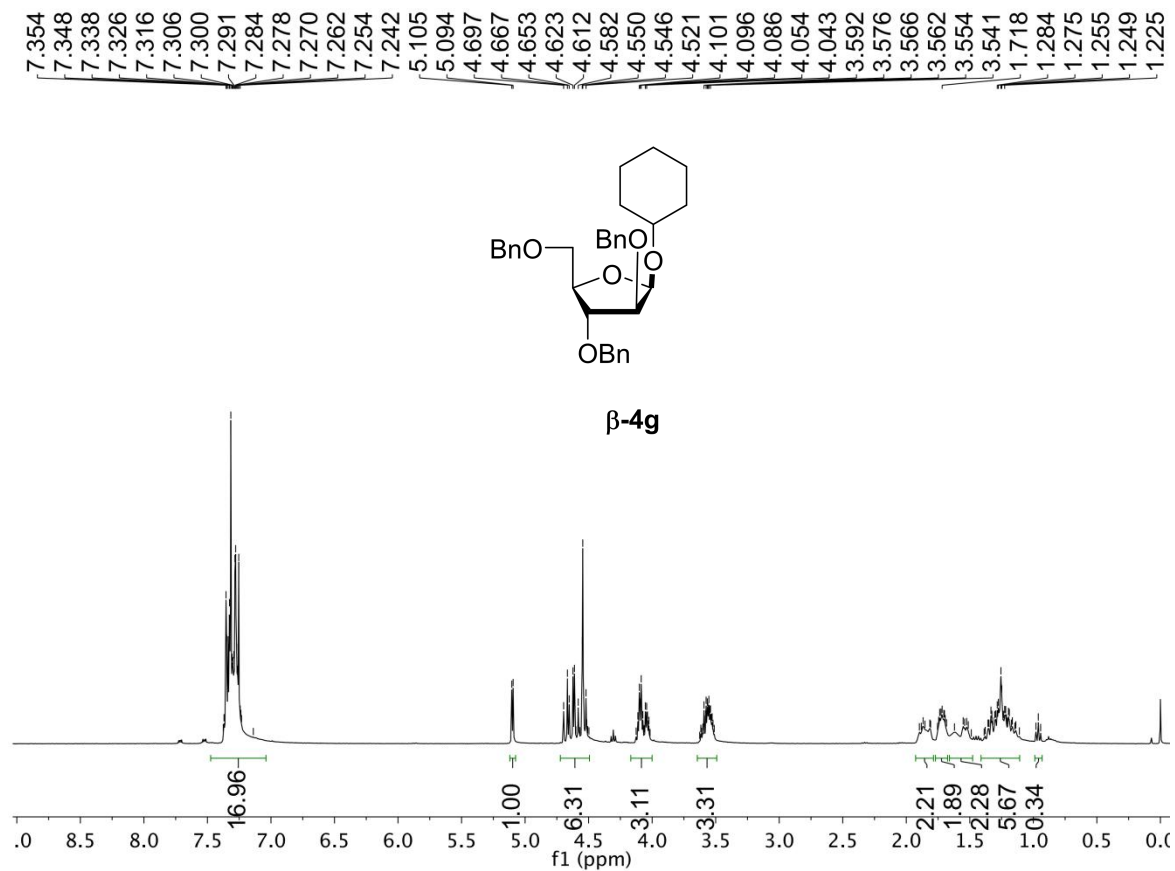

Figure S83.  $^1\text{H}$  NMR (400 MHz,  $\text{CDCl}_3$ ) spectrum of  $\beta$ -4g

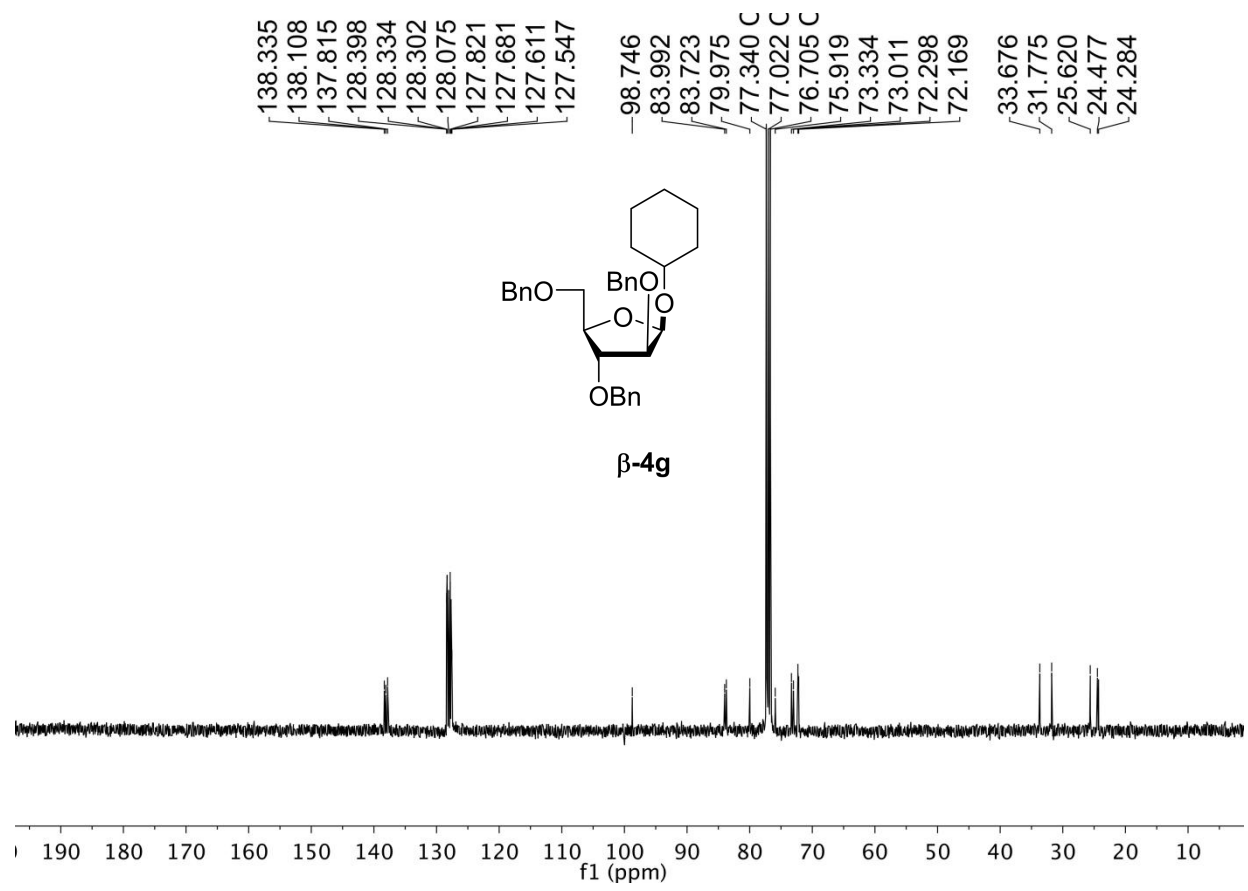

Figure S84. <sup>13</sup>C NMR (400 MHz, CDCl<sub>3</sub>) spectrum of **β-4g**

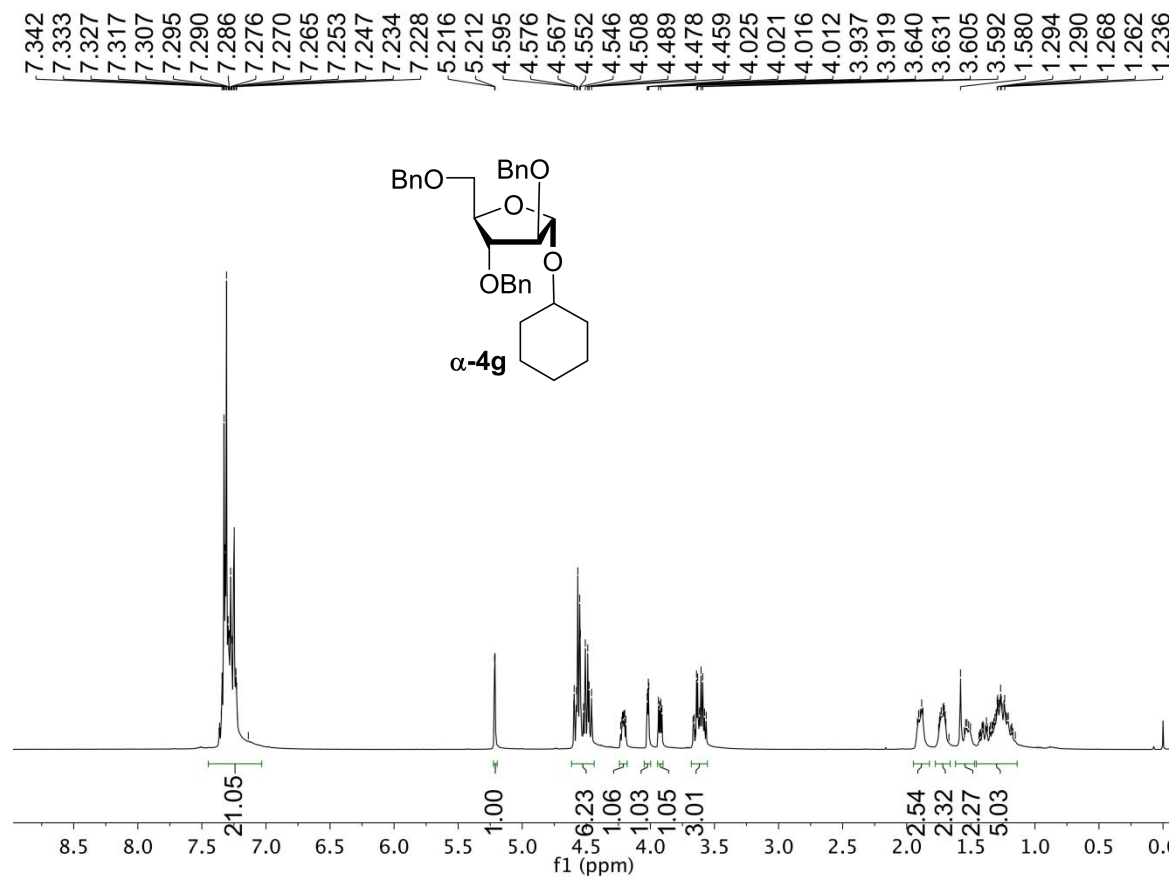

Figure S85.  $^1\text{H}$  NMR (400 MHz,  $\text{CDCl}_3$ ) spectrum of  $\alpha$ -4g

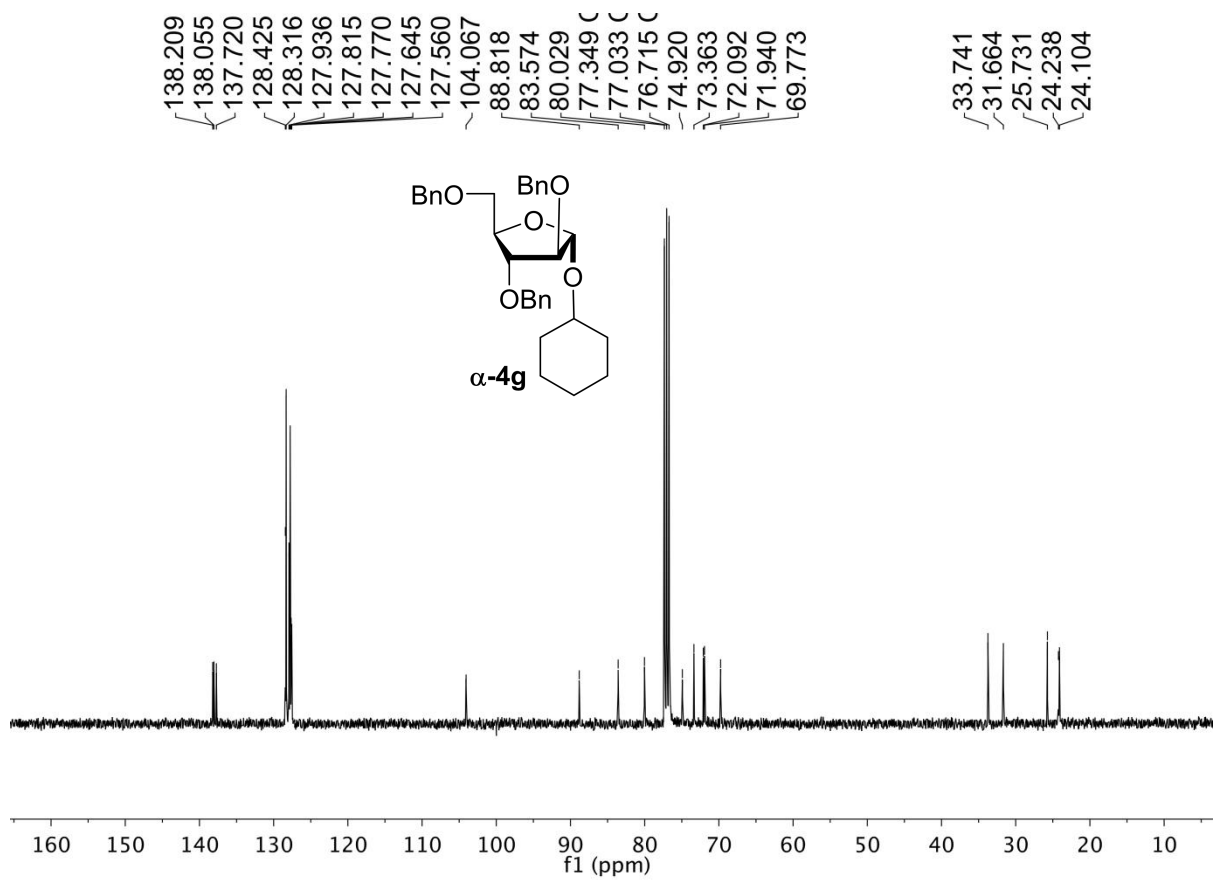

Figure S86.  $^{13}\text{C}$  NMR (400 MHz,  $\text{CDCl}_3$ ) spectrum of  $\alpha$ -4g



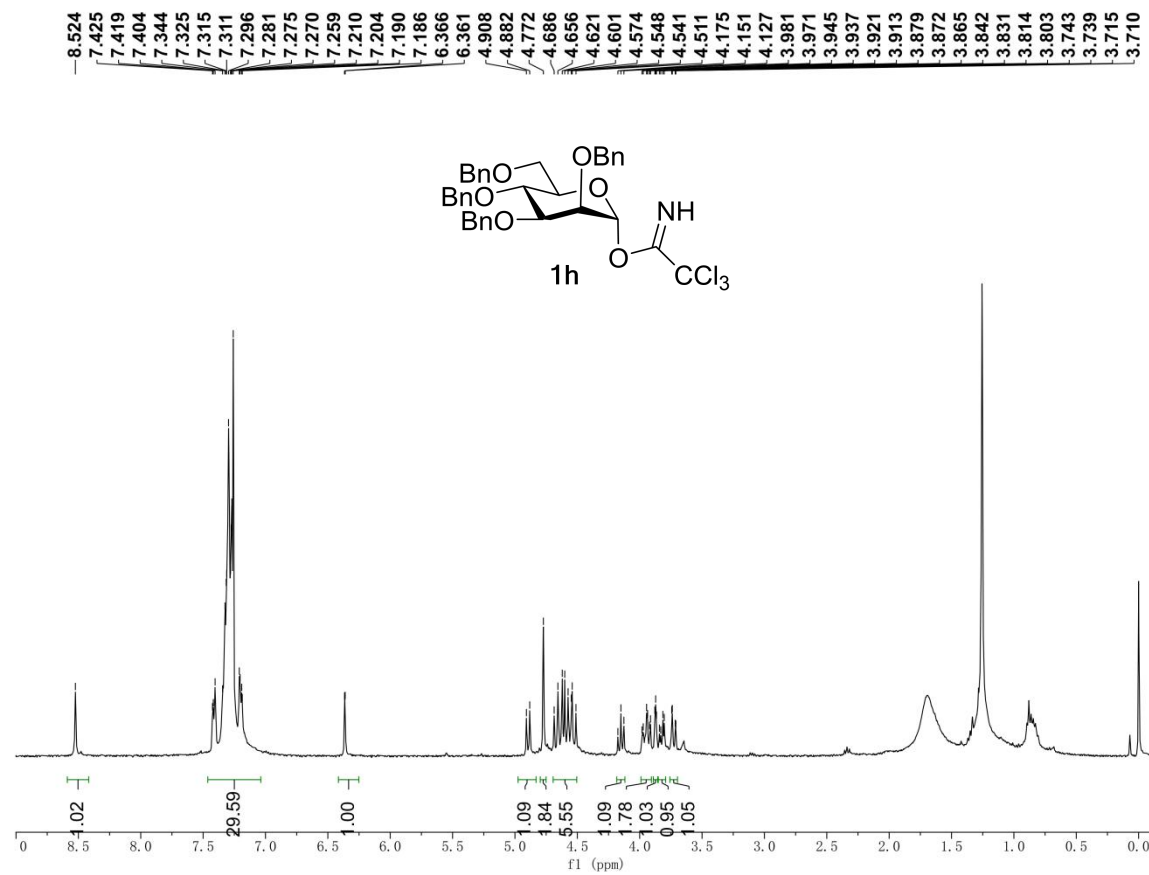

**Figure S87.**  $^1\text{H}$  NMR (400 MHz,  $\text{CDCl}_3$ ) spectrum of **1h**

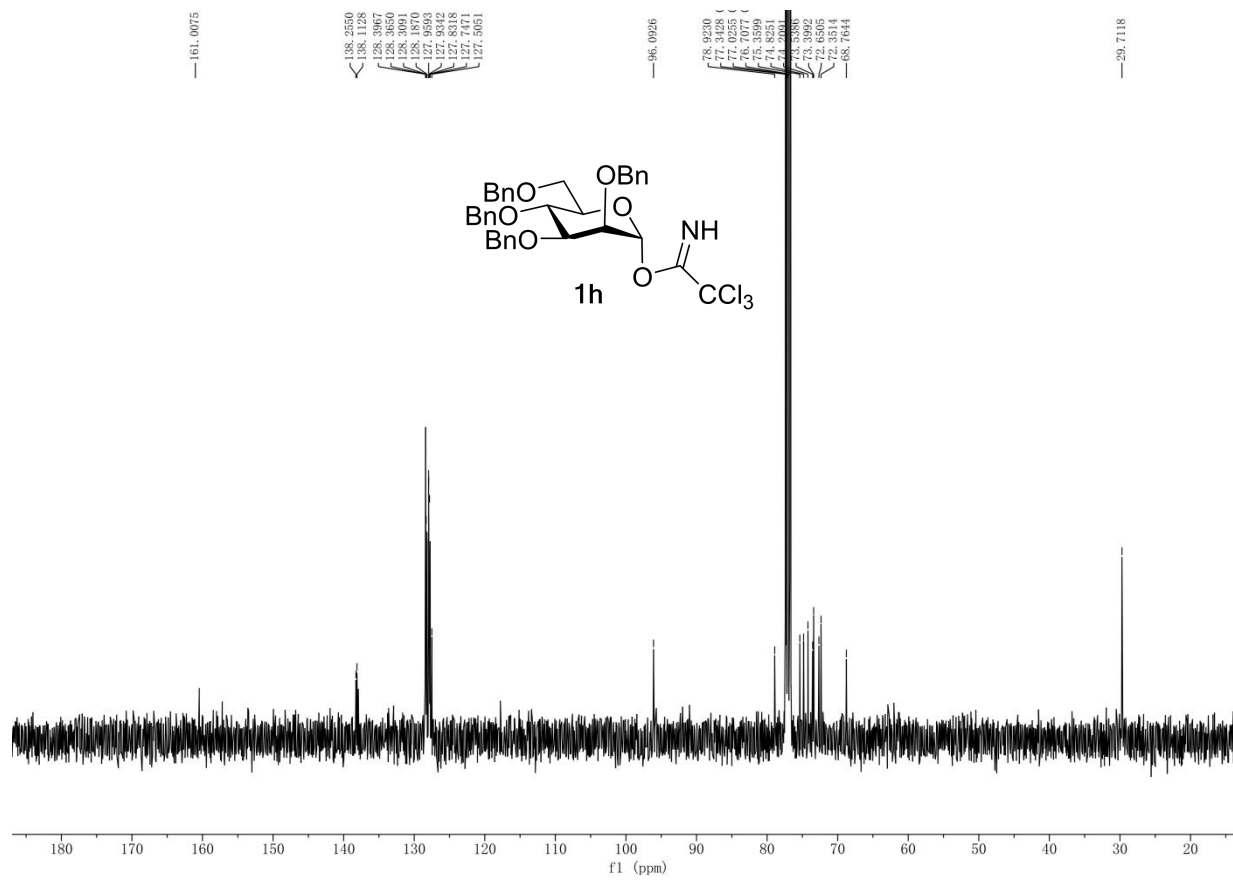

**Figure S88.**  $^{13}\text{C}$  NMR (400 MHz,  $\text{CDCl}_3$ ) spectrum of **1h**

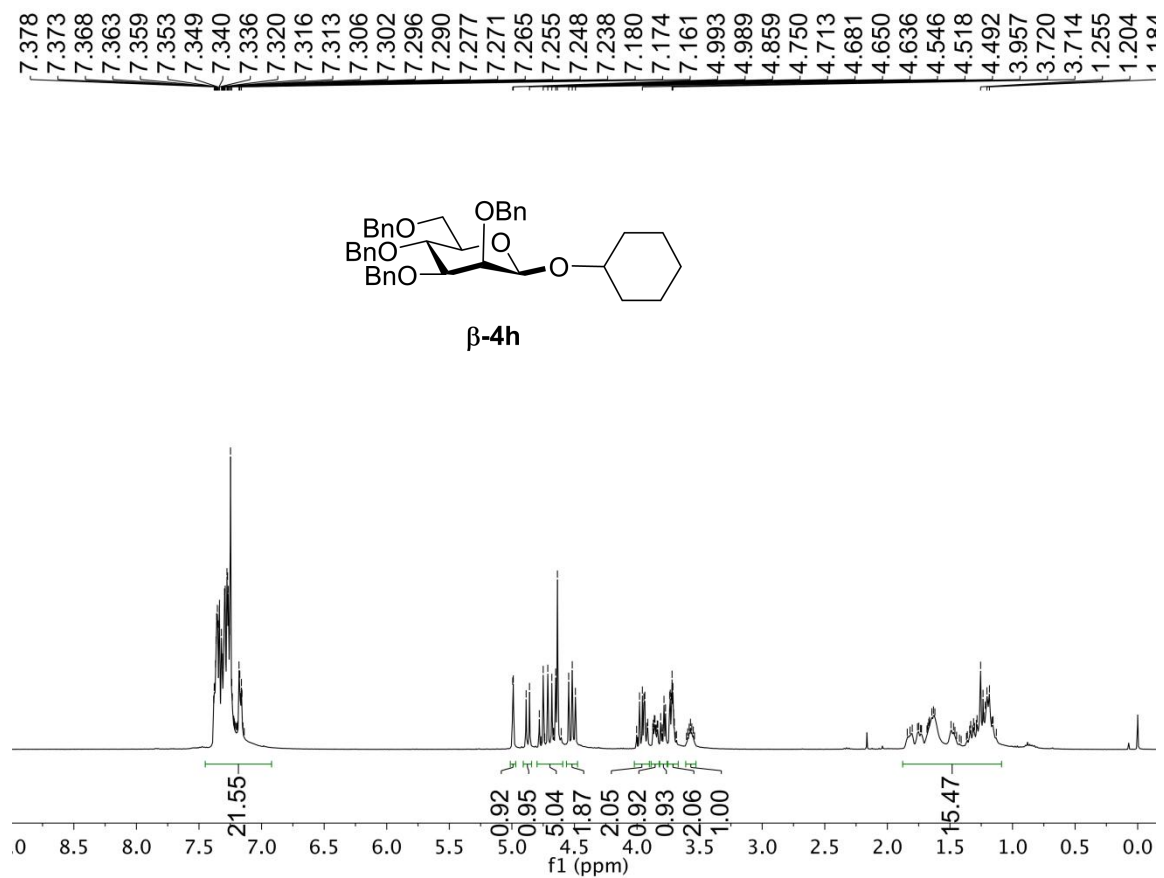

**Figure S89.**  $^1\text{H}$  NMR (400 MHz,  $\text{CDCl}_3$ ) spectrum of  **$\beta$ -4h**

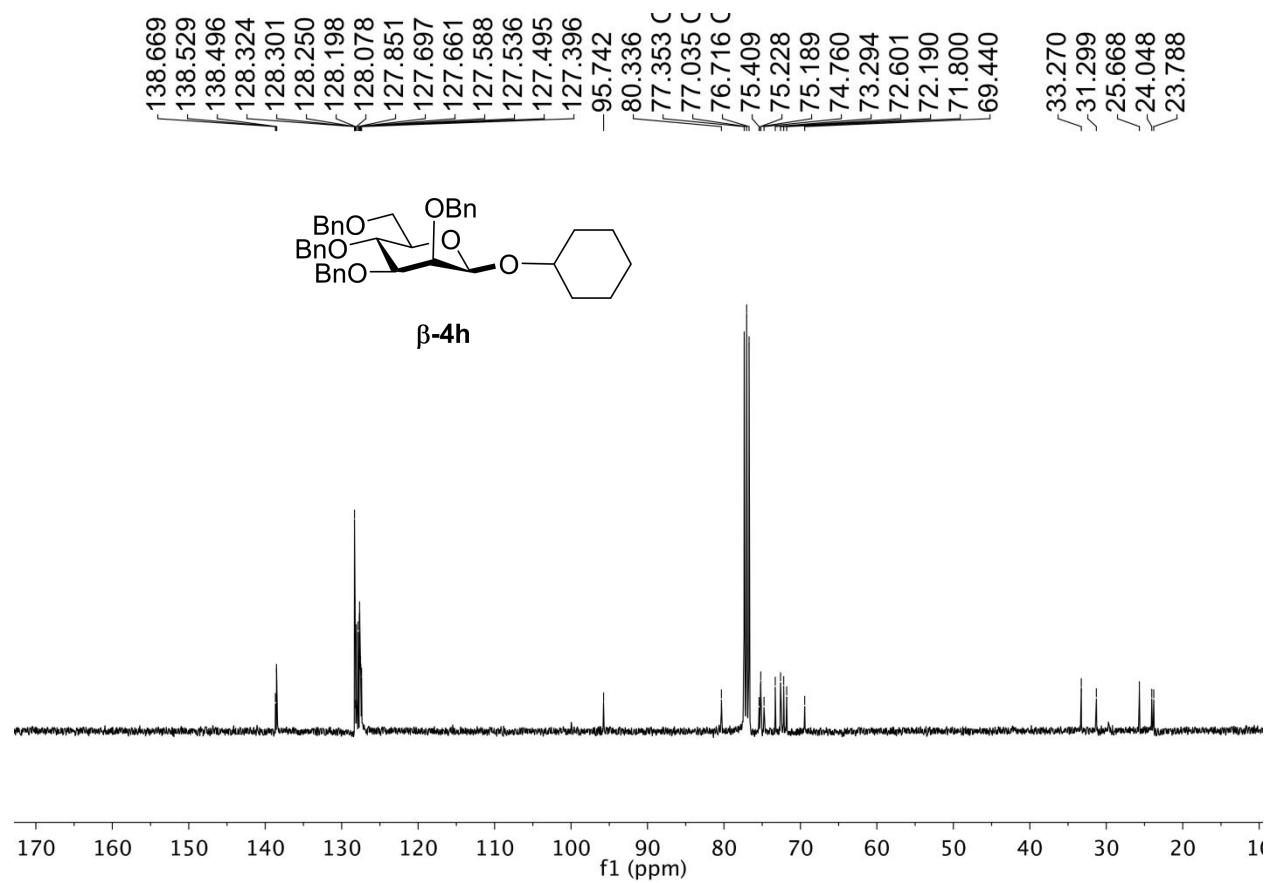

**Figure S90.** <sup>13</sup>C NMR (400 MHz, CDCl<sub>3</sub>) spectrum of **β-4h**

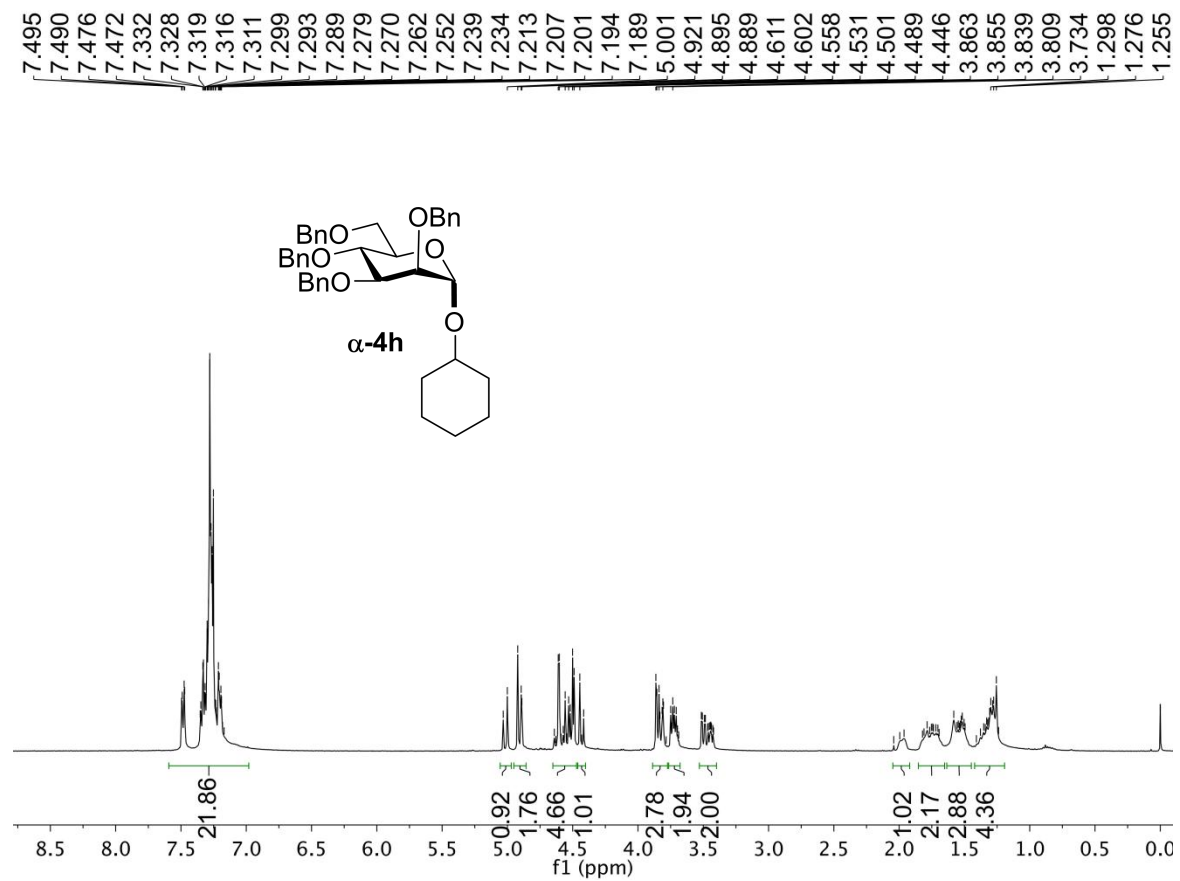

Figure S91.  $^1\text{H}$  NMR (400 MHz,  $\text{CDCl}_3$ ) spectrum of  $\alpha$ -4h

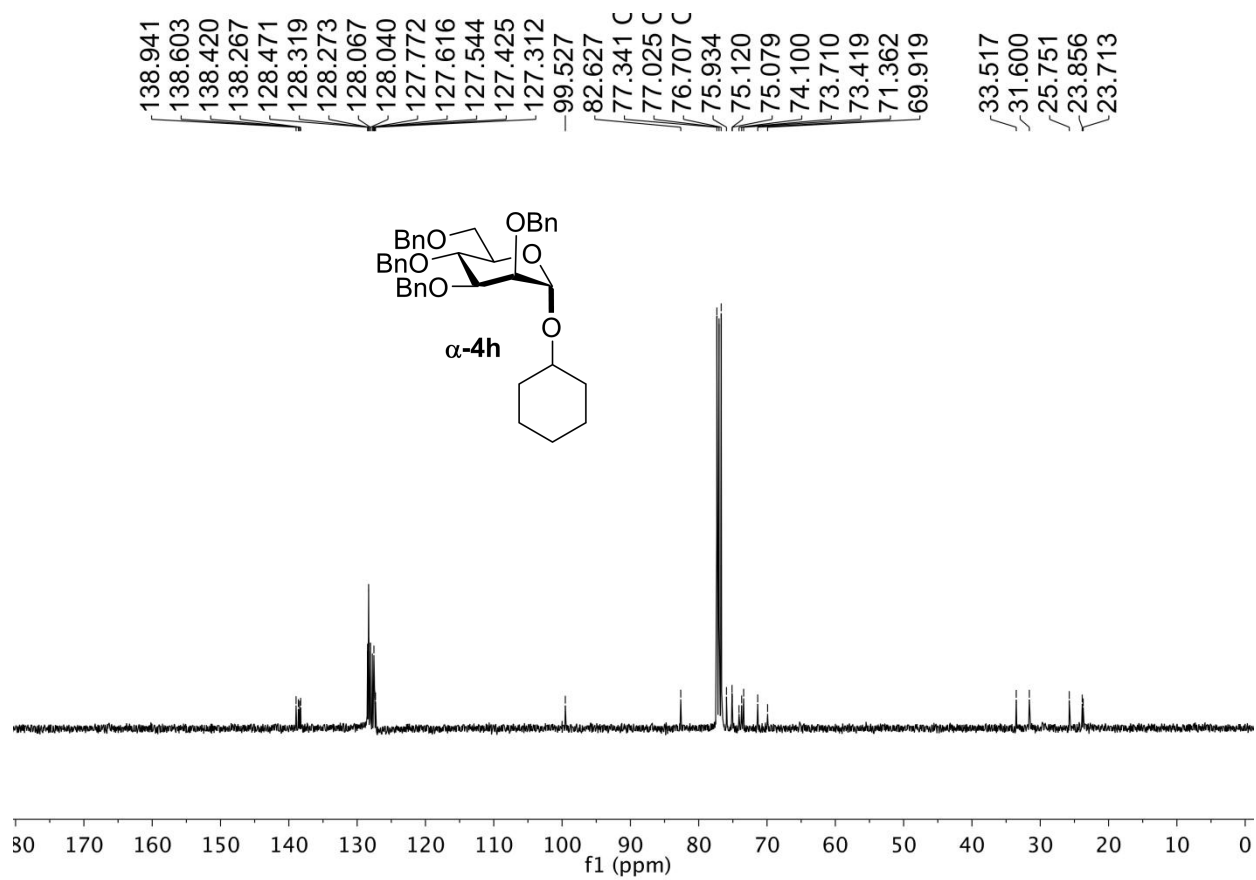

**Figure S92.** <sup>13</sup>C NMR (400 MHz, CDCl<sub>3</sub>) spectrum of **α-4h**

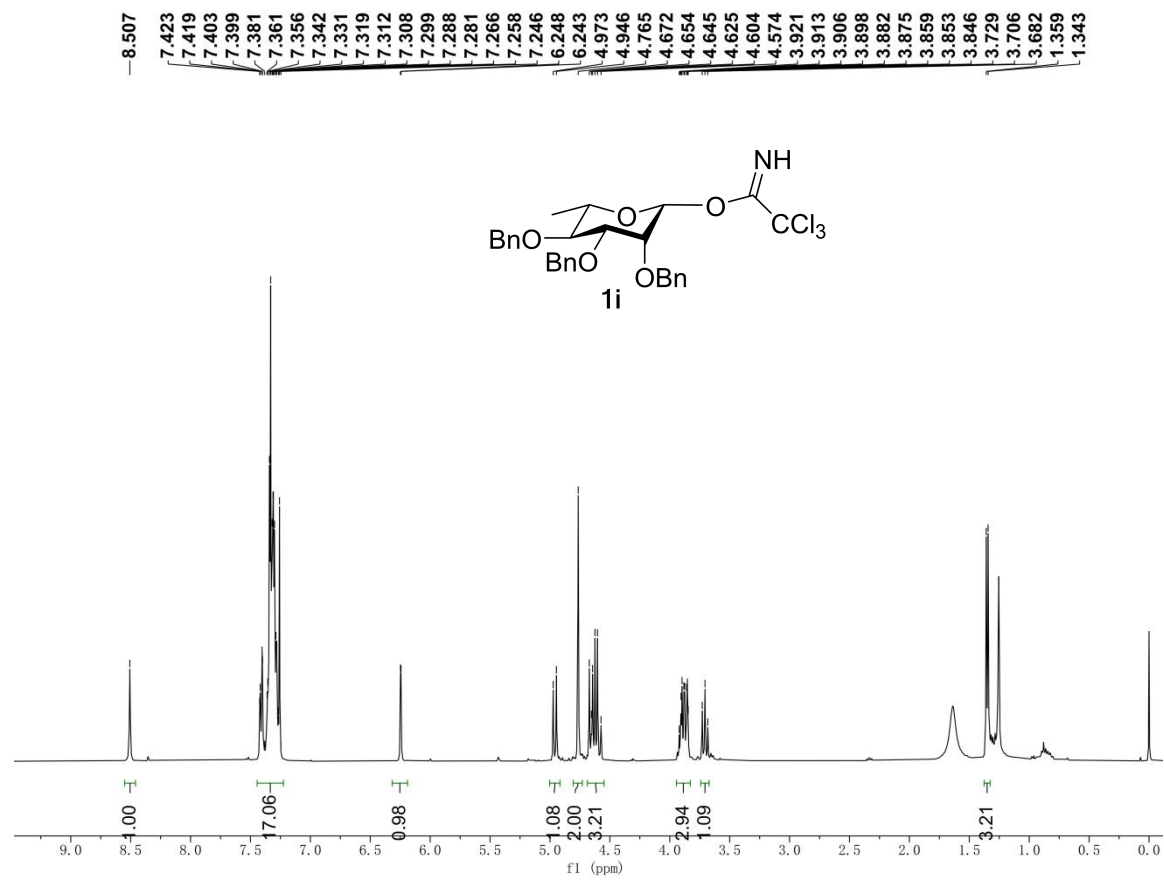

**Figure S93.**  $^1\text{H}$  NMR (400 MHz,  $\text{CDCl}_3$ ) spectrum of **1i**

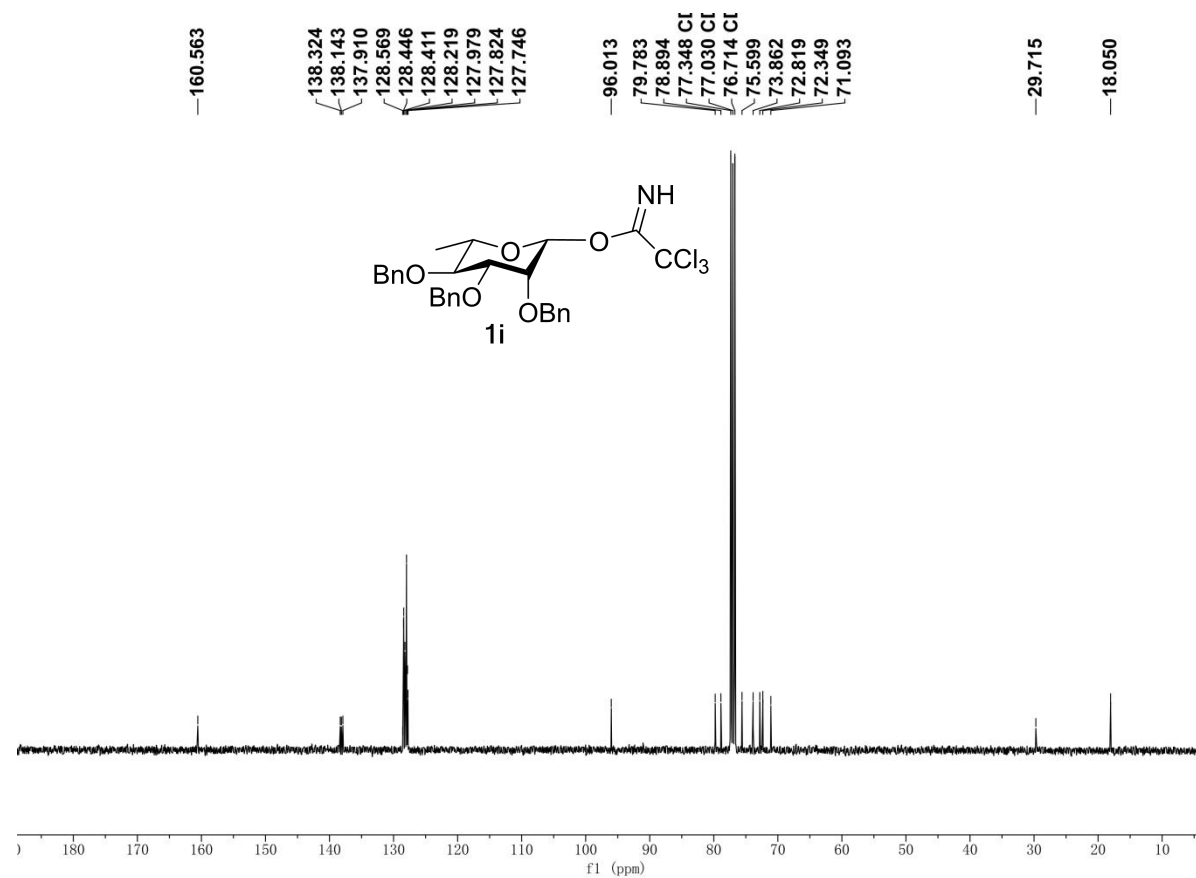

Figure S94. <sup>13</sup>C NMR (400 MHz, CDCl<sub>3</sub>) spectrum of **1i**



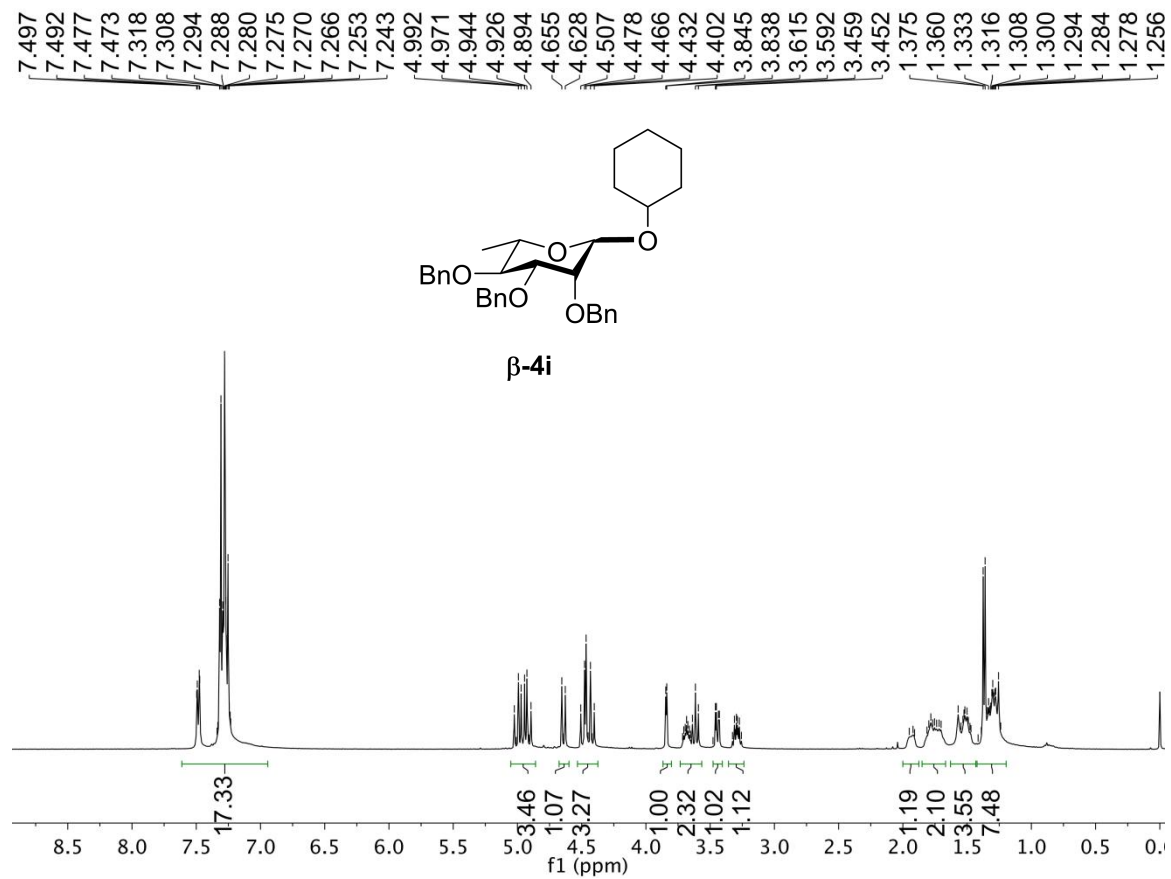

**Figure S95.** <sup>1</sup>H NMR (400 MHz, CDCl<sub>3</sub>) spectrum of **β-4i**

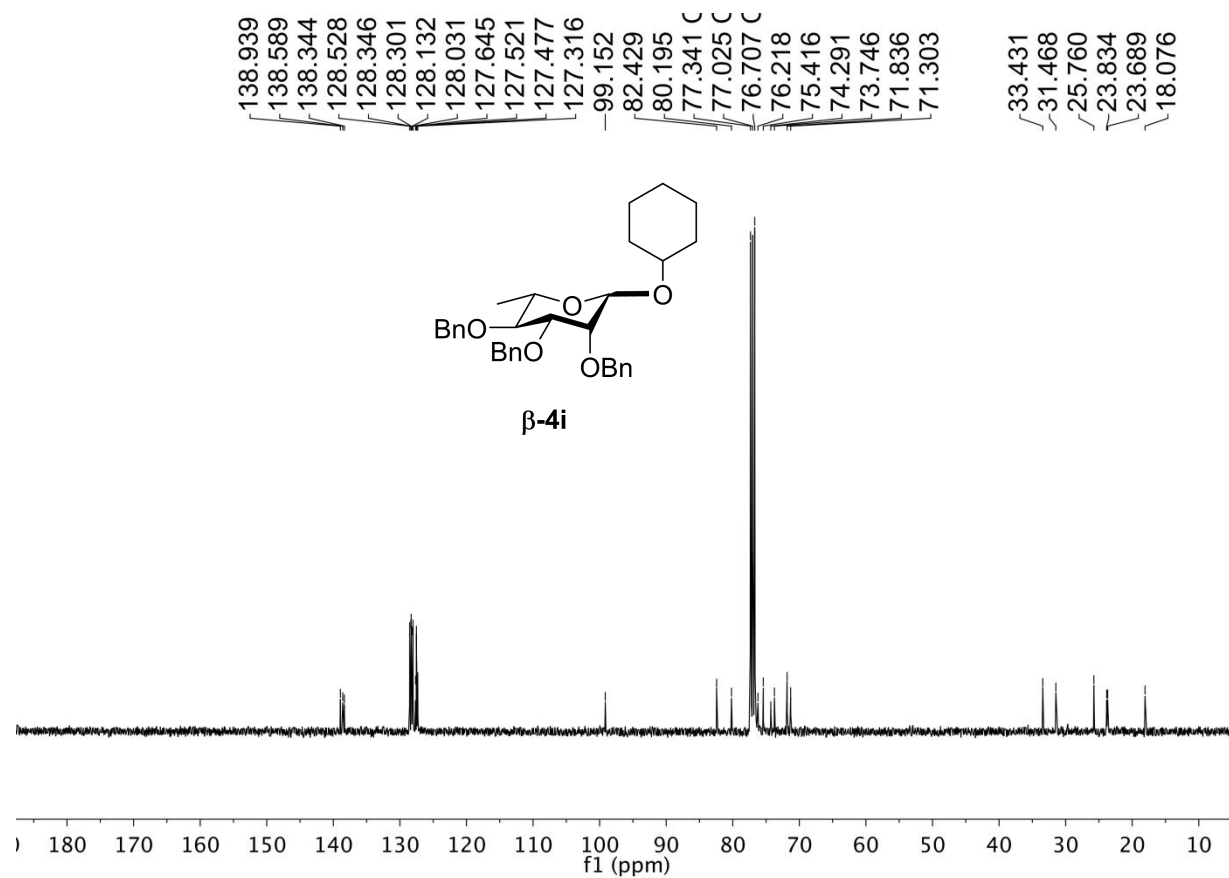

Figure S96. <sup>13</sup>C NMR (400 MHz, CDCl<sub>3</sub>) spectrum of **β-4i**

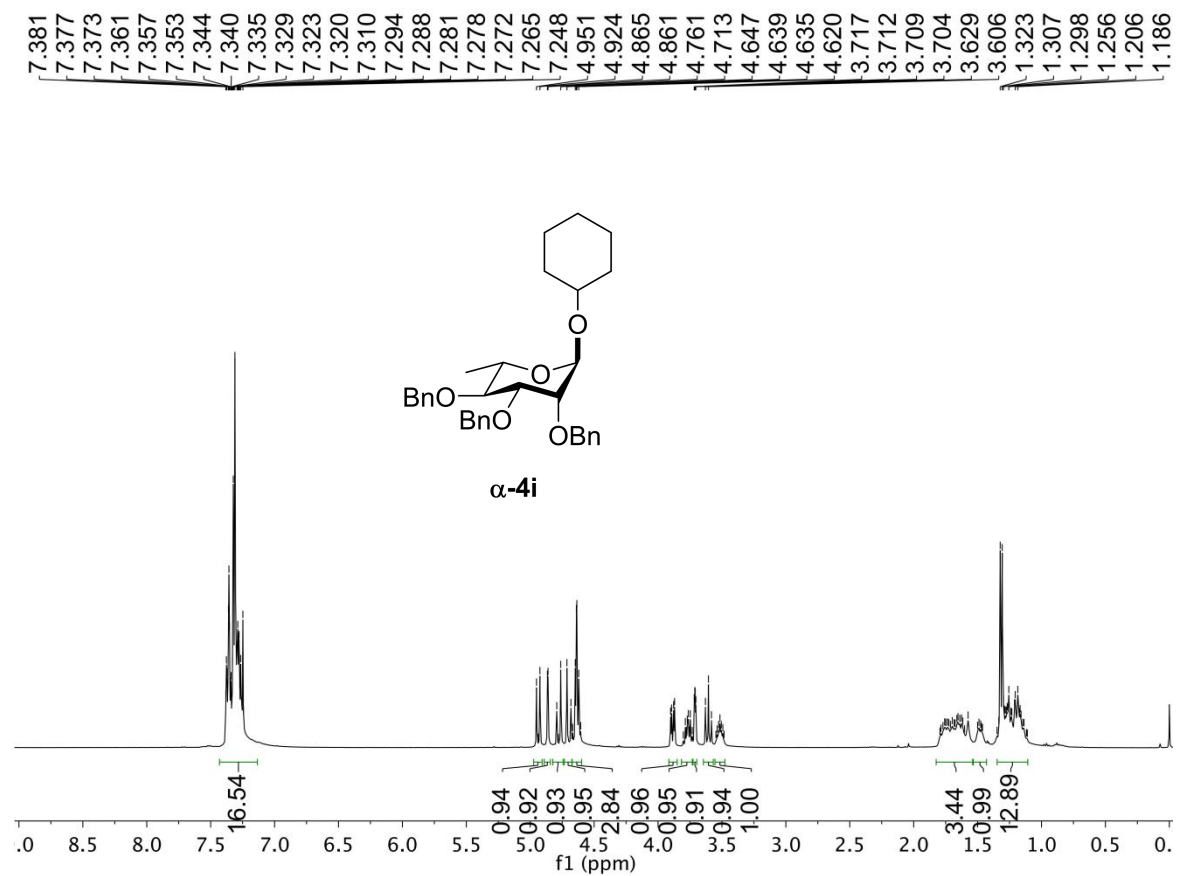

Figure S97.  $^1\text{H}$  NMR (400 MHz,  $\text{CDCl}_3$ ) spectrum of  $\alpha$ -4i

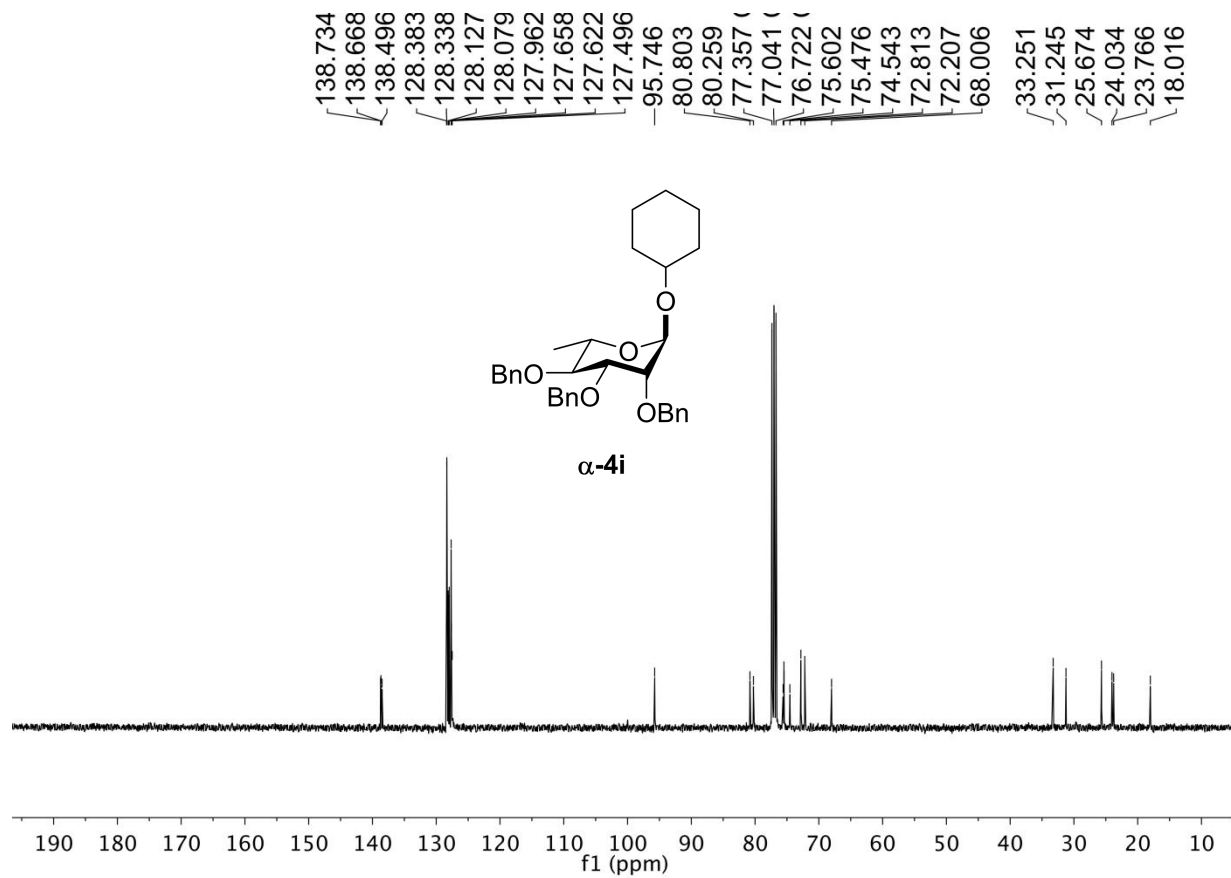

Figure S98.  $^{13}\text{C}$  NMR (400 MHz,  $\text{CDCl}_3$ ) spectrum of  $\alpha$ -4i

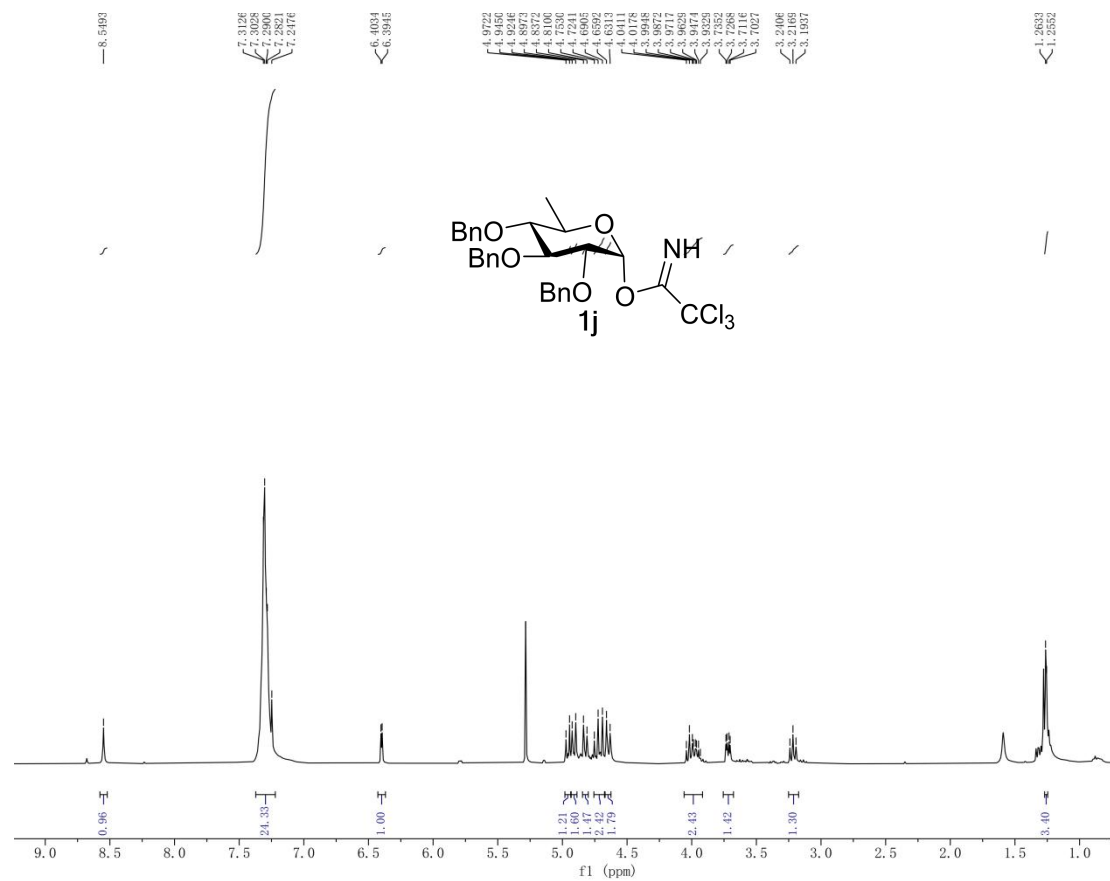

**Figure S99.** <sup>1</sup>H NMR (400 MHz, CDCl<sub>3</sub>) spectrum of **1j**

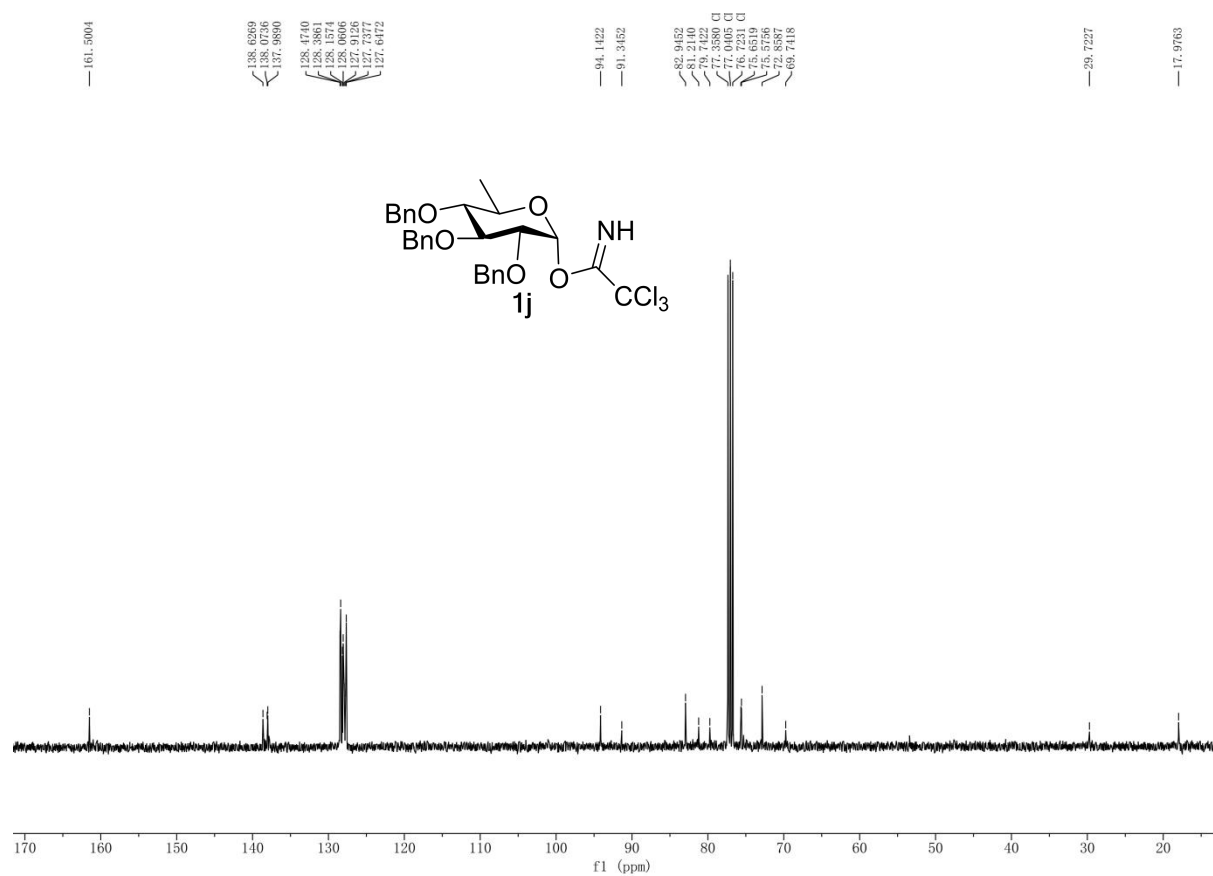

**Figure S100.** <sup>13</sup>C NMR (400 MHz, CDCl<sub>3</sub>) spectrum of ***α*-4i**

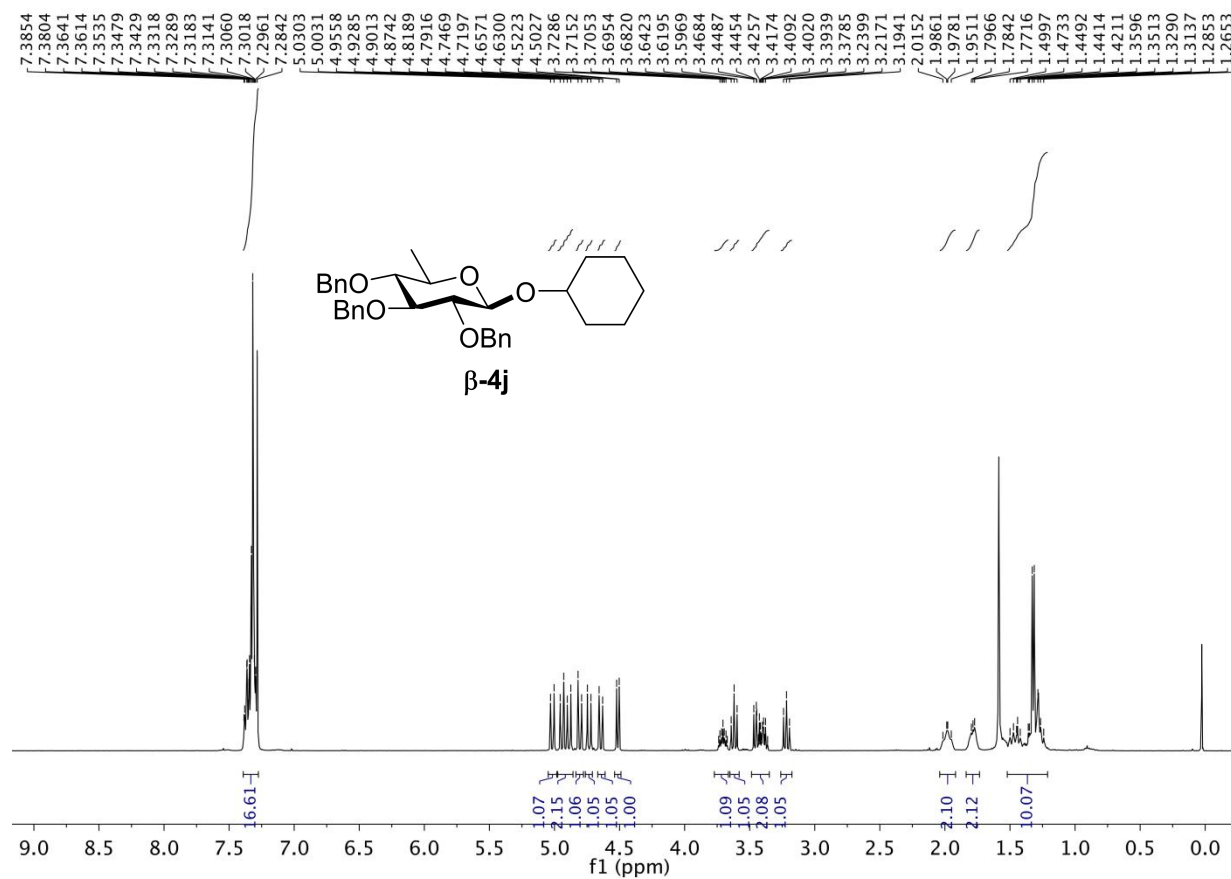

**Figure S101.**  $^1\text{H}$  NMR (400 MHz,  $\text{CDCl}_3$ ) spectrum of  $\beta\text{-4j}$

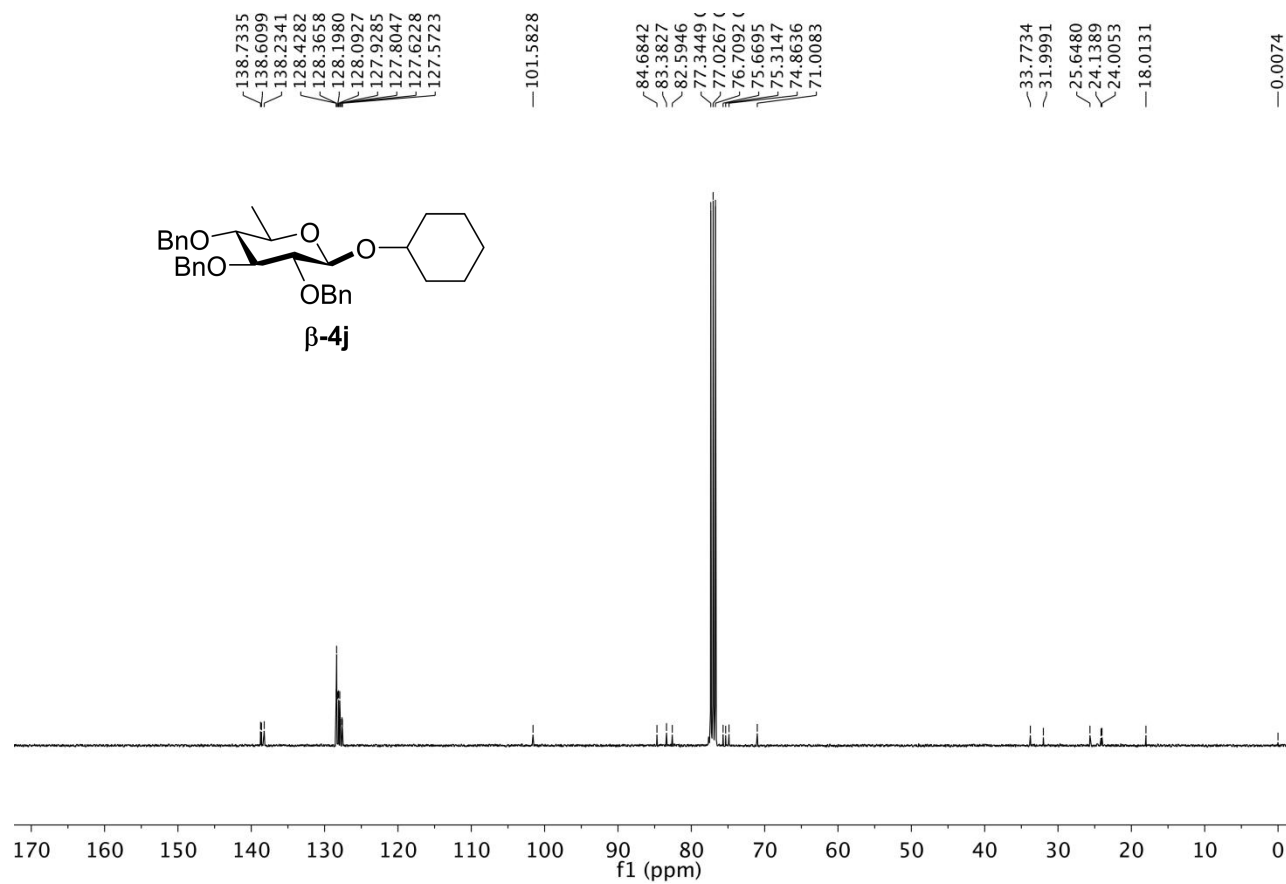

Figure S102.  $^{13}\text{C}$  NMR (400 MHz,  $\text{CDCl}_3$ ) spectrum of  $\beta$ -4j



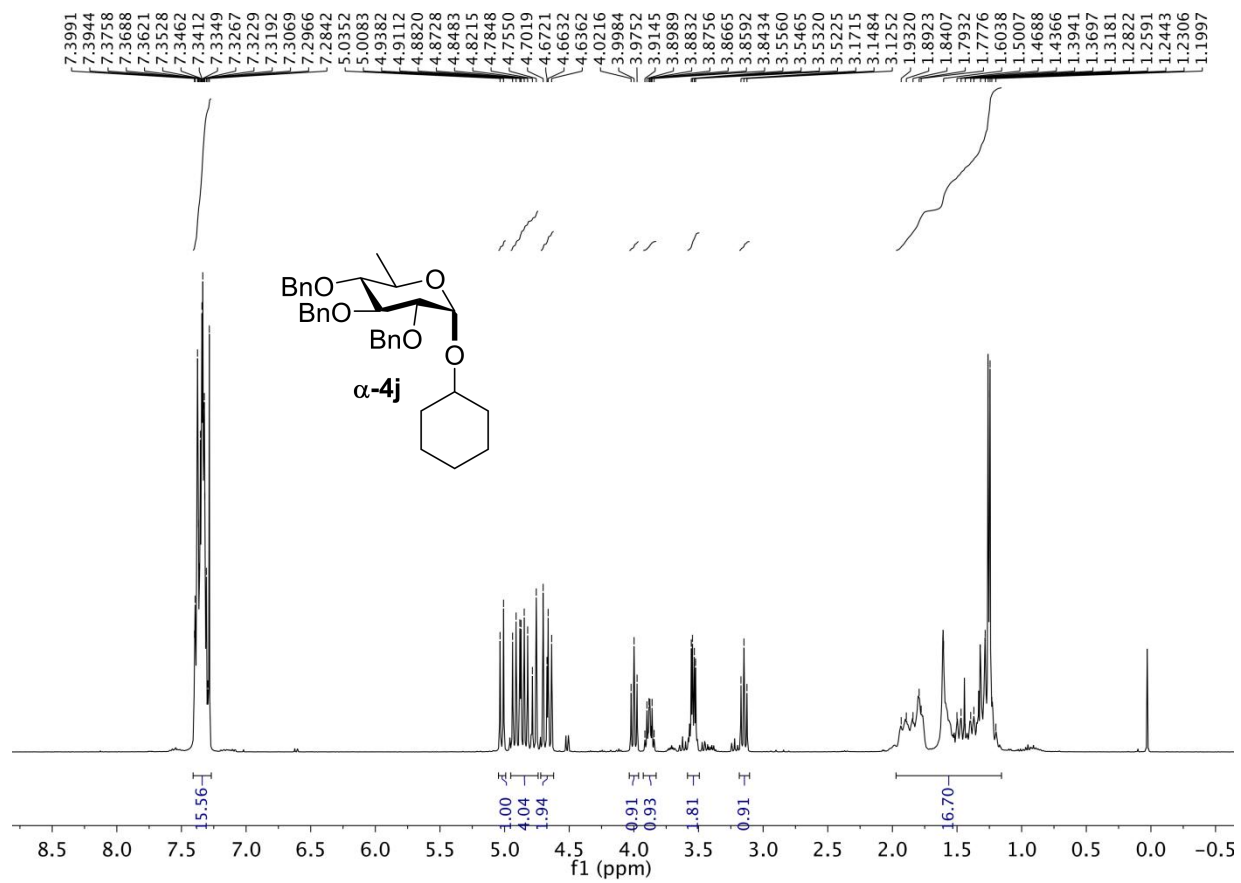

Figure S103.  $^1\text{H}$  NMR (400 MHz,  $\text{CDCl}_3$ ) spectrum of  $\alpha$ -4j

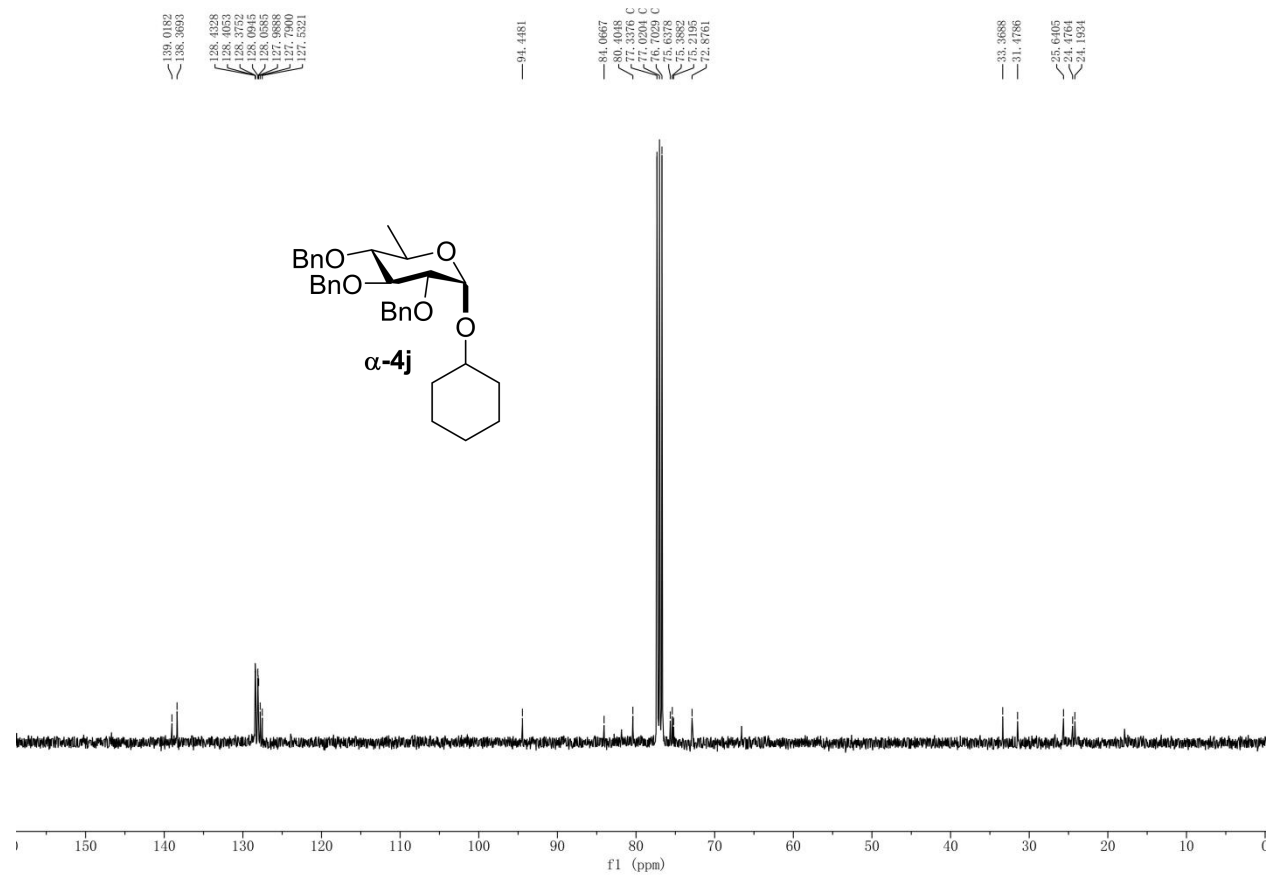

Figure S104.  $^{13}\text{C}$  NMR (400 MHz,  $\text{CDCl}_3$ ) spectrum of  $\alpha$ -4j
